# Supplementary material for: A conserved signaling axis integrates conflicting environmental drought and heat signals to control stomatal aperture in plants
Source: Research Square preprint supplement (doi:10.21203/rs.3.rs-3228667/v1), 2023-08-18
Supplement: Supplementary file 1 [file 147bd2228620635b0f325845.xlsx]

## Sheet: S3A
Extended Data Table 3A. Proteins detected by mass spectrometry after GFP-TOT3 pulldown from Arabidopsis seedlings in the 3 indicated conditions (mock, heat and ABA)
T: Protein IDs	Gene Model Description	Primary Gene Symbol	All Gene Symbols	mock_1	mock_2	mock_3	mock_4	heat_1	heat_2	heat_3	heat_4	ABA_1	ABA_2	ABA_3	ABA_4	C: Student's T-test Significant mock_heat	C: Student's T-test significant	C: Student's T-test Significant mock_ABA	C: Student's T-test significant_	N: Peptides	N: Razor + unique peptides	N: Unique peptides	N: Sequence coverage [%]	N: Unique + razor sequence coverage [%]	N: Unique sequence coverage [%]	N: Mol. weight [kDa]	N: Q-value	N: Score	N: Intensity	N: MS/MS count	N: Student's T-test p-value mock_heat	N: Student's T-test Difference mock_heat	N: Student's T-test Test statistic mock_heat	N: Student's T-test p-value mock_ABA	N: Student's T-test Difference mock_ABA	N: Student's T-test Test statistic mock_ABA	T: Protein IDs	T: Majority protein IDs	T: id
AT1G03130	Encodes a protein predicted by sequence similarity with spinach PsaD to be photosystem I reaction center subunit II (PsaD2)	PHOTOSYSTEM I SUBUNIT D-2 (PSAD-2)	PHOTOSYSTEM I SUBUNIT D-2 (PSAD-2)	26.0374	26.3519	26.7294	26.328	26.2018	26.2625	26.855	26.194	26.6319	26.0195	26.139	26.5986					8	8	8	49	49	49	22.306	0	142.88	5695500000	101	0.940436	-0.0166378	-0.077906	0.94778	0.0144386	0.0682816	AT1G03130.1;AT4G02770.1	AT1G03130.1;AT4G02770.1	2
AT1G05190	Encodes the plastid 50S ribosomal protein L6.	EMBRYO DEFECTIVE 2394 (emb2394)	EMBRYO DEFECTIVE 2394 (emb2394);RIBOSOMAL PROTEIN UL6C (UL6C); (RPL6)	23.1947	23.9815	23.9624	23.8872	23.4413	23.6617	24.0207	23.006	23.8952	23.9254	23.9016	23.3656					6	6	6	36.3	36.3	36.3	24.705	0	62.549	1235000000	55	0.459903	0.224022	0.789443	0.948835	-0.0155272	-0.0669005	AT1G05190.1	AT1G05190.1	5
AT1G06680	Encodes a 23 kD extrinsic protein that is part of photosystem II and participates in the regulation of oxygen evolution. Phosphorylation of this protein is dependent on calcium. In plsp1-1 mutant plastids, the nonmature form of the protein localizes in the stroma. The mRNA is cell-to-cell mobile.	PHOTOSYSTEM II SUBUNIT P-1 (PSBP-1)	PHOTOSYSTEM II SUBUNIT P-1 (PSBP-1);OXYGEN-EVOLVING ENHANCER PROTEIN 2 (OEE2);PHOTOSYSTEM II SUBUNIT P (PSII-P);OXYGEN EVOLVING COMPLEX SUBUNIT 23 KDA (OE23)	21.9436	23.0657	NaN	23.8998	24.3348	22.9788	25.5908	23.8715	24.484	23.4064	22.3312	24.1017					4	4	4	32.4	32.4	32.4	23.759	0	33.321	842900000	16	0.186267	-1.22423	-1.53127	0.442491	-0.611095	-0.833607	AT1G06680.2;AT1G06680.1	AT1G06680.2;AT1G06680.1	6
AT5G02570	Histone superfamily protein;(source:Araport11)	(HTB10)	(HTB10)	22.3405	NaN	23.3506	NaN	22.6105	23.1237	22.8361	22.2345	NaN	23.626	22.6666	23.5484					2	2	2	18.2	18.2	18.2	14.544	0	3.5745	283870000	9	0.747442	0.144307	0.345043	0.484924	-0.434812	-0.794556	AT5G02570.1;AT2G37470.1;AT5G22880.1;AT3G46030.1;AT1G07790.1;AT5G59910.1;AT3G45980.1;AT2G28720.1;AT3G09480.1;AT3G53650.1	AT5G02570.1;AT2G37470.1;AT5G22880.1;AT3G46030.1;AT1G07790.1;AT5G59910.1;AT3G45980.1;AT2G28720.1;AT3G09480.1;AT3G53650.1	9
AT1G07930	GTP binding Elongation factor Tu family protein.	0	0	26.1483	26.6501	24.7292	26.0733	24.3036	26.0231	26.5242	26.12	26.3703	25.7204	NaN	26.7917					4	4	4	13.2	13.2	13.2	41.374	0	58.833	3254500000	28	0.814064	0.157483	0.245753	0.507083	-0.393892	-0.714141	AT1G07930.2;AT5G60390.3;AT5G60390.2;AT5G60390.1;AT1G07940.4;AT1G07940.3;AT1G07940.2;AT1G07940.1;AT1G07930.1;AT1G07920.1	AT1G07930.2;AT5G60390.3;AT5G60390.2;AT5G60390.1;AT1G07940.4;AT1G07940.3;AT1G07940.2;AT1G07940.1;AT1G07930.1;AT1G07920.1	11
AT1G09750	Eukaryotic aspartyl protease family protein;(source:Araport11)	0	0	23.8212	24.5254	24.7686	24.1618	24.0347	24.5757	NaN	23.6551	24.5968	24.1793	24.2249	24.3165					2	2	2	5.1	5.1	5.1	47.661	0	7.4352	799080000	18	0.518082	0.230755	0.694896	0.965887	-0.0101523	-0.0445822	AT1G09750.1	AT1G09750.1	14
AT1G13440	The expression level of GAPC-2 is upregulated in Arabidopsis seedlings exposed to cadmium.	GLYCERALDEHYDE-3-PHOSPHATE DEHYDROGENASE C2 (GAPC2)	GLYCERALDEHYDE-3-PHOSPHATE DEHYDROGENASE C-2 (GAPC-2);GLYCERALDEHYDE-3-PHOSPHATE DEHYDROGENASE C2 (GAPC2)	24.3361	24.3204	23.6946	23.8723	24.2245	23.5544	25.1905	23.615	24.2868	23.7416	NaN	23.8961					4	4	4	20.3	20.3	20.3	33.905	0	78.597	988070000	15	0.834073	-0.0902472	-0.218781	0.743557	0.0810396	0.345815	AT1G13440.2;AT3G04120.1;AT1G13440.1	AT1G13440.2;AT3G04120.1;AT1G13440.1	16
AT1G15820	Lhcb6 protein (Lhcb6), light harvesting complex of photosystem II.	LIGHT HARVESTING COMPLEX PHOTOSYSTEM II SUBUNIT 6 (LHCB6)	LIGHT HARVESTING COMPLEX PHOTOSYSTEM II SUBUNIT 6 (LHCB6); (CP24)	26.7058	27.3819	27.0607	27.5072	26.9803	27.8898	26.8509	26.5105	27.4818	27.5376	26.9589	27.2598					9	9	9	43.8	43.8	43.8	27.522	0	323.31	18398000000	166	0.768806	0.10604	0.30757	0.536717	-0.145607	-0.655064	AT1G15820.1	AT1G15820.1	18
AT1G20620	Catalase, catalyzes the breakdown of hydrogen peroxide (H2O2) into water and oxygen.The mRNA is cell-to-cell mobile.It is a target for SUMOlaytion (PMID: 21413927).Transnitrosylates GSNOR1 and mutants suppress the gnsnor1 phenotype.	REPRESSOR OF GSNOR1 (ROG1)	REPRESSOR OF GSNOR1 (ROG1)	22.5032	23.3321	23.6126	23.705	23.1797	23.0912	22.9368	22.3461	23.6738	NaN	NaN	22.7619					4	4	2	12.4	12.4	6.6	48.898	0	59.017	586290000	21	0.273329	0.399801	1.20567	0.894063	0.0703716	0.141841	AT1G20620.2;AT1G20620.5;AT1G20620.1;AT1G20620.6;AT1G20620.7;AT1G20620.4;AT1G20630.1	AT1G20620.2;AT1G20620.5;AT1G20620.1;AT1G20620.6;AT1G20620.7;AT1G20620.4	20
AT4G09800	encodes a ribosomal protein S18C, a constituent of the small subunit of the ribosomal complex	S18 RIBOSOMAL PROTEIN (RPS18C)	S18 RIBOSOMAL PROTEIN (RPS18C);RIBOSOMAL PROTEIN US13X (US13X)	26.24	26.5717	24.1231	26.1783	26.2386	25.8738	NaN	25.7603	26.0551	26.4942	25.4847	25.6346					2	2	2	13.8	13.8	13.8	17.545	0	192.28	2185900000	18	0.800199	-0.179278	-0.266908	0.825452	-0.138883	-0.230377	AT4G09800.1;AT1G34030.1;AT1G22780.1	AT4G09800.1;AT1G34030.1;AT1G22780.1	21
AT1G70600	Ribosomal protein L18e/L15 superfamily protein;(source:Araport11)	RIBOSOMAL PROTEIN UL15X (UL15X)	RIBOSOMAL PROTEIN UL15X (UL15X)	NaN	NaN	NaN	NaN	NaN	NaN	NaN	NaN	24.1155	23.8045	24.5638	24.2914					2	2	2	15.1	15.1	15.1	16.455	0	5.0393	506300000	11	NaN	0	NaN	1	NaN	0	AT1G70600.1;AT1G23290.1	AT1G70600.1;AT1G23290.1	24
AT2G47110	polyubiquitin gene The mRNA is cell-to-cell mobile.	UBIQUITIN 6 (UBQ6)	UBIQUITIN 6 (UBQ6);UBIQUITIN EXTENSION PROTEIN 6 (UBI6);RIBOSOMAL PROTEIN S27AB (RPS27AB);RIBOSOMAL PROTEIN ES31Y (ES31Y)	NaN	24.2021	24.6802	25.0438	24.0272	24.1808	NaN	24.0044	24.3425	25.274	25.1129	24.7065					2	2	2	15.3	15.3	15.3	17.812	0	52.032	904130000	37	0.084267	0.571241	2.28557	0.529163	-0.216918	-0.675788	AT2G47110.1;AT3G62250.1;AT1G23410.1;AT2G47110.2;AT2G36170.1;AT4G05320.2;AT5G20620.1;AT4G05320.3;AT4G05320.6;AT3G52590.1;AT4G05320.1;AT3G09790.2;AT1G65350.1;AT5G03240.1;AT5G03240.2;AT5G03240.3;AT5G20620.2;AT4G05320.5;AT4G05320.4;AT4G02890.4;AT4G02890.3;AT4G05320.8;AT4G05050.4;AT4G05320.7;AT2G35635.1;AT1G31340.1;AT5G37640.1;AT4G02890.1;AT4G02890.2;AT4G05050.2;AT4G05050.3;AT4G05050.1;AT1G55060.1;AT3…	AT2G47110.1;AT3G62250.1;AT1G23410.1;AT2G47110.2;AT2G36170.1;AT4G05320.2;AT5G20620.1;AT4G05320.3;AT4G05320.6;AT3G52590.1;AT4G05320.1;AT3G09790.2;AT1G65350.1;AT5G03240.1;AT5G03240.2;AT5G03240.3;AT5G20620.2;AT4G05320.5;AT4G05320.4;AT4G02890.4;AT4G02890.3;AT4G05320.8;AT4G05050.4;AT4G05320.7;AT2G35635.1;AT1G31340.1;AT5G37640.1;AT4G02890.1;AT4G02890.2;AT4G05050.2;AT4G05050.3;AT4G05050.1;AT1G55060.1;AT3…	25
AT1G29930	Subunit of light-harvesting complex II (LHCII),which absorbs light and transfers energy to the photosynthetic reaction center. The mRNA is cell-to-cell mobile.	CHLOROPHYLL A/B BINDING PROTEIN 1 (CAB1)	CHLOROPHYLL A/B BINDING PROTEIN 1 (CAB1); (AB140);CHLOROPHYLL A/B PROTEIN 140 (CAB140);LIGHT-HARVESTING CHLOROPHYLL A/B-PROTEIN 1.3 (LHCB1.3);CELLULOSE SYNTHASE LIKE C8 (CLSC8)	28.6294	28.3953	27.4596	27.8225	28.2695	28.8189	28.3184	27.8963	27.96	28.0657	27.0418	27.4305					8	2	2	42.3	27.3	27.3	28.241	0	91.769	9143700000	49	0.475145	-0.249071	-0.761625	0.25324	0.452209	1.26363	AT1G29930.1;AT1G29920.1;AT1G29910.1	AT1G29930.1;AT1G29920.1;AT1G29910.1	30
AT1G31330	Encodes subunit F of photosystem I.	PHOTOSYSTEM I SUBUNIT F (PSAF)	PHOTOSYSTEM I SUBUNIT F (PSAF)	25.1071	25.9026	25.9547	25.7579	25.6112	25.1281	25.4388	23.7503	25.5506	25.9673	25.2828	25.6063					4	4	4	14.9	14.9	14.9	24.173	0	23.812	2421700000	65	0.184319	0.698457	1.49985	0.754792	0.0788217	0.326976	AT1G31330.1	AT1G31330.1	32
AT1G33140	Encodes ribosomal protein L9. Identified in a screen for enhancers of as1. as1/pgy double mutants show defects in leaf vascular patterning and adaxial cell fate. Double mutant analysis indicates pgy genes function in the same pathway as REV, KAN1 and KAN2. The mRNA is cell-to-cell mobile.	PIGGYBACK2 (PGY2)	RIBOSOMAL PROTEIN UL6Y (UL6Y);PIGGYBACK2 (PGY2)	24.46	25.1604	25.8424	25.2653	25.0449	25.21	25.26	25.0487	25.0113	25.4956	25.1734	25.0858					7	7	7	41.2	41.2	41.2	22.017	0	272.89	2398600000	91	0.891445	0.0411329	0.142374	0.975988	-0.00950527	-0.0313755	AT1G33140.1;AT1G33120.1;AT4G10450.1;AT4G10450.2	AT1G33140.1;AT1G33120.1	33
AT1G42970	Encodes chloroplast localized glyceraldehyde-3-phosphate dehydrogenase that can use both NADH and NADPH to reduce 1,3-diphosphate glycerate. It forms A2B2 heterotetramers with GapA forms of the GADPH enzyme. These complexes are active in the light under reducing conditions, but show reduced NADPH-dependent activity in response to oxidized thioredoxins and increased NAD(H)/NADP(H) ratios due to th…	GLYCERALDEHYDE-3-PHOSPHATE DEHYDROGENASE B SUBUNIT (GAPB)	GLYCERALDEHYDE-3-PHOSPHATE DEHYDROGENASE B SUBUNIT (GAPB)	23.6122	24.2534	23.5672	23.9651	24.0144	23.5342	24.1325	23.3077	24.0933	23.966	23.4061	23.9246					7	7	7	25.3	25.3	25.3	47.659	0	61.769	1030400000	32	0.70061	0.10225	0.403438	0.99319	0.00196886	0.00889713	AT1G42970.1	AT1G42970.1	35
AT1G44575	Encoding PSII-S (CP22), a ubiquitous pigment-binding protein associated with photosystem II (PSII) of higher plants. Involved in nonphotochemical quenching rather than in photosynthesis. Mutant has a normal violaxanthin cycle but has a limited capacity of quenching singlet excited chlorophylls and is tolerant to lipid peroxidation.	NONPHOTOCHEMICAL QUENCHING 4 (NPQ4)	NONPHOTOCHEMICAL QUENCHING 4 (NPQ4);PHOTOSYSTEM II SUBUNIT S (PSBS); (CP22)	24.0274	24.6541	24.8467	25.1848	24.3691	24.5845	24.5586	24.5233	24.9395	25.0086	24.762	24.9609					5	5	5	23.4	23.4	23.4	28.007	0	48.293	1792500000	50	0.519886	0.169356	0.683353	0.373199	-0.239529	-0.962002	AT1G44575.1;AT1G44575.3;AT1G44575.2	AT1G44575.1;AT1G44575.3;AT1G44575.2	38
AT3G18780	Encodes an actin that is constitutively expressed in vegetative structures but not pollen. ACT2 is involved in tip growth of root hairs.	ACTIN 2 (ACT2)	ACTIN 2 (ACT2);DEFORMED ROOT HAIRS 1 (DER1);LIGHT STRESS-REGULATED 2 (LSR2);ENHANCER OF LRX1 2 (ENL2)	25.081	25.4166	26.271	25.6394	25.501	25.6083	25.3666	25.3227	25.6772	25.9572	25.4101	25.3919					6	6	4	23.1	23.1	16.7	41.876	0	101.28	3337800000	98	0.578008	0.152337	0.58795	0.98094	-0.00707054	-0.0249029	AT3G18780.3;AT3G18780.2;AT1G49240.1;AT3G18780.1;AT2G42100.1	AT3G18780.3;AT3G18780.2;AT1G49240.1;AT3G18780.1	43
AT1G51805	Leucine-rich repeat protein kinase family protein;(source:Araport11)	STRESS INDUCED FACTOR 3 (SIF3)	STRESS INDUCED FACTOR 3 (SIF3)	NaN	20.6363	NaN	NaN	NaN	NaN	NaN	NaN	NaN	21.6222	21.3702	20.9682					3	3	3	3.3	3.3	3.3	95.296	0	3.9539	77404000	4	1	NaN	0	1	-0.683926	0	AT1G51805.2;AT1G51805.1;AT1G51890.5;AT1G51820.1;AT1G51890.1;AT2G19230.2;AT3G46330.1;AT2G28960.2;AT2G19210.1;AT3G46400.1;AT1G51850.2;AT1G49100.1;AT1G51880.1;AT3G46340.1;AT1G51870.2;AT1G51860.1;AT1G51880.2;AT2G04300.2;AT1G51800.1;AT1G51880.3;AT1G51890.2;AT3G21340.1;AT1G51910.1;AT2G29000.1;AT1G51820.2;AT2G28960.1;AT5G16900.2;AT5G16900.4;AT1G51830.1;AT1G51830.2;AT3G21340.2;AT1G51890.3;AT1G51810.1;AT1…	AT1G51805.2;AT1G51805.1	45
AT1G54780	Encodes a thylakoid lumen protein regulating photosystem II repair cycle. Has acid phosphatase activity. The mRNA is cell-to-cell mobile.	THYLAKOID LUMEN PROTEIN 18.3 (TLP18.3)	(ATTLP18.3);THYLAKOID LUMEN PROTEIN 18.3 (TLP18.3)	NaN	22.8438	NaN	NaN	NaN	NaN	22.9032	NaN	23.7837	23.1572	NaN	23.1456					2	2	2	6.3	6.3	6.3	31.138	0	7.8466	275130000	15	1	-0.0594521	0	1	-0.518362	0	AT1G54780.1	AT1G54780.1	48
AT3G13470	Encodes a subunit of chloroplasts chaperonins that are involved in mediating the folding of newly synthesized, translocated, or stress-denatured proteins. Cpn60 subunits are: Cpn60alpha1 (At2g28000), AtCpn60alpha2 (At5g18820), AtCpn60beta1 (At1g55490), AtCpn60beta2 (At3g13470), AtCpn60beta3 (At5g56500), AtCpn60beta4 (At1g26230).	CHAPERONIN-60BETA2 (CPN60BETA2)	CHAPERONIN-60BETA2 (CPN60BETA2); (CPNB2)	NaN	NaN	22.4055	NaN	22.6049	NaN	24.2326	22.7609	NaN	NaN	NaN	NaN					2	2	2	4.2	4.2	4.2	63.341	0	9.3581	116380000	9	1	-0.794003	0	1	NaN	0	AT3G13470.1;AT1G55490.5;AT1G55490.4;AT1G55490.3;AT1G55490.2;AT1G55490.1;AT5G56500.2;AT5G56500.1	AT3G13470.1;AT1G55490.5;AT1G55490.4;AT1G55490.3;AT1G55490.2;AT1G55490.1;AT5G56500.2;AT5G56500.1	50
AT1G61520	PSI type III chlorophyll a/b-binding protein (Lhca3*1) The mRNA is cell-to-cell mobile.	PHOTOSYSTEM I LIGHT HARVESTING COMPLEX GENE 3 (LHCA3)	PHOTOSYSTEM I LIGHT HARVESTING COMPLEX GENE 3 (LHCA3)	24.4365	24.971	25.5979	24.8731	25.0865	25.4839	25.154	25.0897	24.6436	25.2737	24.3268	25.3544					4	4	4	28.4	28.4	28.4	23.746	0	34.105	1842900000	75	0.39885	-0.233873	-0.908059	0.845911	0.0700145	0.20291	AT1G61520.2;AT1G61520.3;AT1G61520.1	AT1G61520.2;AT1G61520.3;AT1G61520.1	55
AT1G67090	Encodes a member of the Rubisco small subunit (RBCS) multigene family: RBCS1A (At1g67090), RBCS1B (At5g38430), RBCS2B (At5g38420), and RBCS3B (At5g38410). Functions to yield sufficient Rubisco content for leaf photosynthetic capacity.	RIBULOSE BISPHOSPHATE CARBOXYLASE SMALL CHAIN 1A (RBCS1A)	RIBULOSE BISPHOSPHATE CARBOXYLASE SMALL CHAIN 1A (RBCS1A)	26.0757	24.8739	24.3088	NaN	25.116	24.6638	26.6566	25.8438	24.6095	NaN	NaN	NaN					5	5	4	23.3	23.3	18.9	20.216	0	31.302	1170100000	20	0.505856	-0.483901	-0.716304	1	0.476619	0	AT1G67090.1;AT1G67090.2	AT1G67090.1;AT1G67090.2	58
AT1G71500	Encodes PSB33, a protein conserved in the plastid lineage. PSB33 is associated with the chloroplast thylakoid membrane and provides stability to Photosystem II. The mRNA is cell-to-cell mobile.	PHOTOSYSTEM B PROTEIN 33 (PSB33)	LIGHT-HARVESTING-LIKE 8 (LIL8);PHOTOSYSTEM B PROTEIN 33 (PSB33)	NaN	24.2402	24.0989	NaN	22.5901	23.0728	23.2197	22.6858	NaN	24.6183	NaN	24.3644	+	mock_heat			3	3	3	15.7	15.7	15.7	31.727	0	30.602	631120000	15	0.00519555	1.27745	5.53851	0.157198	-0.321792	-2.21451	AT1G71500.1	AT1G71500.1	60
AT1G74060	Ribosomal protein L6 family protein;(source:Araport11)	RIBOSOMAL PROTEIN EL6Y (EL6Y)	RIBOSOMAL PROTEIN EL6Y (EL6Y)	22.3341	NaN	NaN	NaN	23.2165	24.2676	24.0189	23.3794	NaN	NaN	23.6714	23.4692					2	2	2	13.7	13.7	13.7	26.008	0	14.38	421160000	15	1	-1.38652	0	1	-1.23626	0	AT1G74060.1;AT1G74050.1	AT1G74060.1;AT1G74050.1	63
AT1G78900	Encodes catalytic subunit A of the vacuolar ATP synthase. Mutants are devoid of vacuolar ATPase activity as subunit A is encoded only by this gene and show strong defects in male gametophyte development and in Golgi stack morphology. The mRNA is cell-to-cell mobile.	VACUOLAR ATP SYNTHASE SUBUNIT A (VHA-A)	VACUOLAR ATP SYNTHASE SUBUNIT A (VHA-A)	25.1802	24.9148	23.3695	NaN	24.2229	24.4642	24.3398	24.0816	25.113	23.2977	NaN	24.5306					4	4	4	11.1	11.1	11.1	68.812	0	20.837	639260000	13	0.679862	0.211034	0.437704	0.833616	0.174371	0.224161	AT1G78900.2;AT1G78900.1	AT1G78900.2;AT1G78900.1	65
AT1G79040	Encodes for the 10 kDa PsbR subunit of photosystem II (PSII). This subunit appears to be involved in the stable assembly of PSII, particularly that of the oxygen-evolving complex subunit PsbP. Mutants defective in this gene have reduced amounts of subunits PsbP and PsbQ in PSII. In turn, assembly of PsbR is dependent on the presence of PsbJ.	PHOTOSYSTEM II SUBUNIT R (PSBR)	PHOTOSYSTEM II SUBUNIT R (PSBR)	23.0595	23.8074	23.4909	23.8753	22.993	23.9324	23.7991	23.2088	23.7505	24.0243	23.3019	23.6223					3	3	3	30.7	30.7	30.7	14.586	0	193.69	1019700000	19	0.806783	0.0749993	0.255618	0.643424	-0.116444	-0.48717	AT1G79040.1	AT1G79040.1	67
AT1G79200	Encodes a nuclear localized protein involved in auxin-dependent control of cell proliferation in pistil development. Loss of function mutations have increased cell proliferation in the stigma.	STIGMA/STYLE CELL-CYCLE INHIBITOR 1 (SCI1)	(ATSCI1);STIGMA/STYLE CELL-CYCLE INHIBITOR 1 (SCI1)	22.3774	NaN	23.4723	23.1861	22.095	22.8826	23.4578	23.4059	NaN	23.4485	23.5367	23.2963					3	3	3	19.5	19.5	19.5	19.087	0	6.852	318300000	15	0.915759	0.0516151	0.111233	0.283279	-0.41521	-1.2384	AT1G79200.1	AT1G79200.1	68
AT3G10610	Ribosomal S17 family protein;(source:Araport11)	RIBOSOMAL PROTEIN ES17X (ES17X)	RIBOSOMAL PROTEIN ES17X (ES17X)	22.3716	NaN	NaN	NaN	22.8677	22.8969	NaN	22.515	NaN	NaN	NaN	NaN					2	2	2	8.6	8.6	8.6	16.036	0	5.0282	297420000	13	1	-0.388259	0	1	NaN	0	AT3G10610.1;AT2G05220.2;AT2G05220.1;AT5G04800.4;AT5G04800.3;AT5G04800.2;AT5G04800.1;AT2G04390.1	AT3G10610.1;AT2G05220.2;AT2G05220.1;AT5G04800.4;AT5G04800.3;AT5G04800.2;AT5G04800.1;AT2G04390.1	70
AT2G05100	Lhcb2.1 protein encoding a subunit of the light harvesting complex II. Member of a gene family with high degree of sequence similarity. Initially LHCB2.3 was considered as a separate gene but appears to be an allele of LHCB2.1.	0	0	28.4502	29.1216	27.2905	28.0117	27.1273	27.8026	28.2428	27.8624	28.3527	28.3577	27.7687	28.1368					7	3	3	40.8	32.5	32.5	28.649	0	92.163	18471000000	72	0.345347	0.459727	1.02397	0.879653	0.0645423	0.157983	AT2G05100.1;AT2G05070.1;AT3G27690.1;AT3G27690.2;AT2G05100.2	AT2G05100.1;AT2G05070.1;AT3G27690.1;AT3G27690.2;AT2G05100.2	71
AT2G07698	ATPase, F1 complex, alpha subunit protein;(source:Araport11)	0	0	24.1036	24.3356	24.3273	24.0746	24.0955	23.3519	23.8029	23.6914	24.2245	24.3202	NaN	24.1017	+	mock_heat			5	4	4	6.2	5.3	5.3	85.932	0	40.4	681710000	44	0.030707	0.474861	2.81122	0.960065	-0.00518513	-0.0526299	AT2G07698.1;ATMG01190.1	AT2G07698.1;ATMG01190.1	72
AT5G07090	Ribosomal protein S4 (RPS4A) family protein;(source:Araport11)	RIBOSOMAL PROTEIN ES4Y (ES4Y)	RIBOSOMAL PROTEIN ES4Y (ES4Y)	23.944	24.6382	25.0114	25.2636	22.8275	24.3582	24.2945	24.4903	23.7102	25.1026	24.8779	25.1124					2	2	2	11.1	11.1	11.1	27.707	0	53.192	1039700000	16	0.187085	0.721666	1.48891	0.976563	0.0135016	0.0306239	AT5G07090.3;AT5G07090.2;AT2G17360.1;AT5G58420.1;AT5G07090.1	AT5G07090.3;AT5G07090.2;AT2G17360.1;AT5G58420.1;AT5G07090.1	76
AT2G18960	Encodes a plasma membrane proton ATPase. Mutants have a reduced ability to close their stomata in response to drought and are affected in stomatal but not seed responsiveness to ABA. The mRNA is cell-to-cell mobile.	H(+)-ATPASE 1 (HA1)	H(+)-ATPASE 1 (AHA1);PLASMA MEMBRANE PROTON ATPASE (PMA);OPEN STOMATA 2 (OST2);H(+)-ATPASE 1 (HA1)	22.2906	22.3002	22.6272	22.2907	22.2766	22.424	22.4156	22.1984	22.7634	22.8858	22.2477	22.3392					2	2	2	3.3	3.3	3.3	96.857	0	24.81	249160000	8	0.644394	0.0485172	0.485719	0.344547	-0.181869	-1.02581	AT2G18960.3;AT2G18960.2;AT4G30190.1;AT2G18960.1;AT4G30190.2;AT5G57350.3;AT1G17260.1;AT3G42640.1;AT5G57350.4;AT5G57350.2;AT5G57350.1;AT5G62670.1;AT3G47950.2;AT3G47950.1	AT2G18960.3;AT2G18960.2;AT4G30190.1;AT2G18960.1;AT4G30190.2;AT5G57350.3;AT1G17260.1;AT3G42640.1;AT5G57350.4;AT5G57350.2;AT5G57350.1;AT5G62670.1;AT3G47950.2;AT3G47950.1	79
AT2G20260	Encodes subunit E of photosystem I. The mRNA is cell-to-cell mobile.	PHOTOSYSTEM I SUBUNIT E-2 (PSAE-2)	PHOTOSYSTEM I SUBUNIT E-2 (PSAE-2)	22.6701	24.7931	24.0098	24.9538	NaN	23.6277	24.0236	23.4584	24.8876	24.1664	24.6701	24.9982					2	1	1	22.8	13.8	13.8	15.189	0	126.18	827250000	25	0.551649	0.40348	0.637824	0.339424	-0.573846	-1.03766	AT2G20260.1	AT2G20260.1	82
AT2G21580	Ribosomal protein S25 family protein;(source:Araport11)	RIBOSOMAL PROTEIN ES25Y (ES25Y)	RIBOSOMAL PROTEIN ES25Y (ES25Y)	23.3506	23.9457	24.0011	23.5905	24.1402	NaN	24.9616	24.1497	24.2504	24.3029	24.1273	23.8818					3	3	1	34.6	34.6	13.1	11.941	0	26.41	741710000	25	0.0627359	-0.695153	-2.3855	0.058987	-0.418624	-2.3257	AT2G21580.2;AT2G21580.1	AT2G21580.2;AT2G21580.1	84
AT5G44340	beta tubulin gene	TUBULIN BETA CHAIN 4 (TUB4)	TUBULIN BETA CHAIN 4 (TUB4)	24.5957	24.4161	24.56	23.0917	24.9186	23.8713	23.7979	24.6014	24.3028	23.3776	NaN	NaN					3	3	3	8.8	8.8	8.8	49.823	0	31.69	581950000	23	0.781647	-0.131417	-0.289904	0.621656	0.325717	0.533972	AT5G44340.1;AT4G20890.1;AT5G23860.2;AT5G23860.1;AT2G29550.1;AT5G62700.1;AT5G62690.1;AT1G75780.1;AT5G12250.1;AT1G20010.1	AT5G44340.1;AT4G20890.1;AT5G23860.2;AT5G23860.1;AT2G29550.1;AT5G62700.1;AT5G62690.1;AT1G75780.1;AT5G12250.1;AT1G20010.1	89
AT2G30950	Metalloprotease that functions in thylakoid membrane biogenesis. Involved in the repair of PSII following damaged incurred during photoinhibition. Forms a complex with VAR1. Mutants show a variegated phenotype, which decreases during development. Transcript and protein levels increase with light intensity. In plsp1-1 mutant plastids, the nonmature form of the protein localizes in the membrane.	0	0	21.5333	22.8847	22.561	22.9659	22.6854	22.4422	22.7209	NaN	23.2106	23.2935	22.7294	23.0928					3	3	3	7.2	7.2	7.2	74.157	0	11.684	363300000	17	0.756484	-0.129943	-0.327603	0.141869	-0.595359	-1.6906	AT2G30950.3;AT2G30950.2;AT2G30950.1;AT2G30950.4;AT1G06430.3;AT1G06430.2;AT1G06430.1	AT2G30950.3;AT2G30950.2;AT2G30950.1;AT2G30950.4;AT1G06430.3;AT1G06430.2;AT1G06430.1	92
AT2G33450	Ribosomal L28 family;(source:Araport11)	PLASTID RIBOSOMAL PROTEIN L28 (PRPL28)	PLASTID RIBOSOMAL PROTEIN L28 (PRPL28);RIBOSOMAL PROTEIN BL28C (BL28C)	22.3188	NaN	22.3875	22.8988	21.8897	23.5211	24.485	22.7664	NaN	NaN	24.1741	23.4571			+	mock_ABA	2	2	2	11.2	11.2	11.2	16.033	0	9.618	275630000	13	0.390294	-0.630528	-0.940173	0.0370033	-1.28059	-3.59076	AT2G33450.1	AT2G33450.1	96
AT2G34420	Photosystem II type I chlorophyll a/b-binding protein	PHOTOSYSTEM II LIGHT HARVESTING COMPLEX GENE B1B2 (LHB1B2)	PHOTOSYSTEM II LIGHT HARVESTING COMPLEX GENE B1B2 (LHB1B2);PHOTOSYSTEM II LIGHT HARVESTING COMPLEX GENE 1.5 (LHCB1.5)	32.1246	31.295	32.2233	30.8728	31.8921	32.4788	31.7572	31.5093	31.095	31.4774	30.4131	30.5721					9	9	0	53.6	53.6	0	28.054	0	249.7	56053000000	318	0.495115	-0.280427	-0.726099	0.119843	0.739551	1.8126	AT2G34420.1	AT2G34420.1	99
AT3G55280	60S ribosomal protein L23A (RPL23aB). Paralog of RPL23aA and functionally redundant to it.	RIBOSOMAL PROTEIN L23AB (RPL23AB)	RIBOSOMAL PROTEIN L23AB (RPL23AB);RIBOSOMAL PROTEIN UL23Y (UL23Y);RIBOSOMAL PROTEIN L23A2 (RPL23A2)	25.6298	27.1659	26.7268	27.5975	26.3699	26.7497	27.1865	26.2998	27.3646	25.6379	27.5147	26.5454					7	7	7	40.5	40.5	40.5	16.744	0	75.764	5221500000	70	0.793357	0.128509	0.273885	0.98184	0.0143399	0.023727	AT3G55280.3;AT3G55280.2;AT3G55280.1;AT2G39460.2;AT2G39460.1	AT3G55280.3;AT3G55280.2;AT3G55280.1;AT2G39460.2;AT2G39460.1	105
AT2G39730	Rubisco activase, a nuclear-encoded chloroplast protein that consists of two isoforms arising from alternative splicing in most plants. Required for the light activation of rubisco. Involved in jasmonate-induced leaf senescence.	RUBISCO ACTIVASE (RCA)	RUBISCO ACTIVASE (RCA)	27.5751	27.8452	28.2963	27.8527	27.544	28.076	27.7758	27.2811	27.861	27.9848	27.4679	27.6505					12	12	12	37.7	37.7	37.7	49.1	0	323.31	20766000000	180	0.360836	0.223119	0.98904	0.451803	0.151254	0.804494	AT2G39730.2;AT2G39730.3;AT2G39730.1	AT2G39730.2;AT2G39730.3;AT2G39730.1	106
AT2G41840	Ribosomal protein S5 family protein;(source:Araport11)	RIBOSOMAL PROTEIN US5X (US5X)	RIBOSOMAL PROTEIN US5X (US5X)	23.005	23.5434	24.7032	24.1871	22.7487	23.913	23.9745	23.5765	23.1059	24.6538	24.51	24.0229					4	4	4	20	20	20	30.878	0	37.013	748310000	15	0.53494	0.306527	0.658023	0.689803	-0.213482	-0.418998	AT2G41840.1;AT1G59359.1;AT1G58983.1;AT1G58684.1;AT1G58380.1;AT3G57490.1	AT2G41840.1;AT1G59359.1;AT1G58983.1;AT1G58684.1;AT1G58380.1;AT3G57490.1	109
AT5G45775	Ribosomal L5P family protein;(source:Araport11)	RIBOSOMAL PROTEIN UL5W (UL5W)	RIBOSOMAL PROTEIN UL5W (UL5W)	24.3384	24.6851	25.471	24.8455	24.1299	24.9666	25.0033	24.1699	24.6555	24.7857	24.898	24.6694					6	6	6	40.7	40.7	40.7	19.775	0	42.441	1293600000	44	0.459007	0.267545	0.7911	0.745472	0.0828238	0.33996	AT5G45775.1;AT5G45775.2;AT4G18730.1;AT3G58700.1;AT2G42740.1	AT5G45775.1;AT5G45775.2;AT4G18730.1;AT3G58700.1;AT2G42740.1	110
AT2G44120	Ribosomal protein L30/L7 family protein;(source:Araport11)	RIBOSOMAL PROTEIN UL30X (UL30X)	RIBOSOMAL PROTEIN UL30X (UL30X)	22.4346	22.3819	22.8369	22.4748	22.8214	22.8246	22.7868	22.4373	22.6424	NaN	NaN	NaN					2	2	1	9.9	9.9	6.2	27.939	0	10.494	231710000	7	0.232156	-0.185512	-1.32898	1	-0.110375	0	AT2G44120.1;AT2G44120.2;AT2G01250.2;AT2G01250.1	AT2G44120.1;AT2G44120.2;AT2G01250.2;AT2G01250.1	112
AT2G46820	Encodes the P subunit of Photosystem I. About 25% of the TMP14 pool appeared to be phosphorylated, and this ratio is not affected by light. Contains seven phosphorylation sites on threonine residue and chloroplast targeting signal. Located in the proximity of PSI-L, -H and -O subunits. Forms oligomers with other members of CURT1 family to modulate grana structure.	PHOTOSYSTEM I P SUBUNIT (PSI-P)	PLASTID TRANSCRIPTIONALLY ACTIVE 8 (PTAC8);THYLAKOID MEMBRANE PHOSPHOPROTEIN OF 14 KDA (TMP14); (PSAP);PHOTOSYSTEM I P SUBUNIT (PSI-P);CURVATURE THYLAKOID 1B (CURT1B)	23.0049	24.3316	23.5976	24.2055	23.2103	23.5509	23.9571	23.4056	24.4292	24.5014	24.0707	24.2104					1	1	1	14.4	14.4	14.4	18.482	0	65.074	808770000	17	0.488256	0.253906	0.73819	0.15776	-0.518045	-1.61351	AT2G46820.2;AT2G46820.1	AT2G46820.2;AT2G46820.1	114
AT2G47170	Gene encoding ADP-ribosylation factor and similar to other ARFs and ARF-like proteins. Members of this family are known to be essential for vesicle coating and uncoating and functions in GTP-binding. The gene is shown to play a role in cell division, cell expansion and cellulose production using antisense construct. The mRNA is cell-to-cell mobile.	(ARF1A1C)	BFA-VISUALIZED EXOCYTIC TRAFFICKING DEFECTIVE 1 (BEX1); (ARF1A1C)	23.9599	23.9745	24.588	24.117	24.0619	24.4817	24.0591	23.9689	23.8055	24.0905	24.5366	23.8713					4	4	4	27.6	27.6	27.6	20.608	0	13.386	641250000	18	0.930665	0.0169353	0.0907241	0.717559	0.0838771	0.379253	AT2G47170.2;AT2G47170.3;AT2G47170.1;AT5G14670.3;AT1G70490.5;AT3G62290.3;AT3G62290.2;AT3G62290.1;AT1G70490.7;AT1G70490.6;AT1G70490.4;AT5G14670.2;AT1G70490.3;AT1G70490.2;AT1G70490.1;AT1G23490.1;AT1G10630.2;AT1G10630.1;AT5G14670.1	AT2G47170.2;AT2G47170.3;AT2G47170.1;AT5G14670.3;AT1G70490.5;AT3G62290.3;AT3G62290.2;AT3G62290.1;AT1G70490.7;AT1G70490.6;AT1G70490.4;AT5G14670.2;AT1G70490.3;AT1G70490.2;AT1G70490.1;AT1G23490.1;AT1G10630.2;AT1G10630.1;AT5G14670.1	115
AT3G04920	Ribosomal protein S24e family protein;(source:Araport11)	RIBOSOMAL PROTEIN ES24Z (ES24Z)	RIBOSOMAL PROTEIN ES24Z (ES24Z)	24.1658	25.0782	25.9776	25.6541	24.8125	26.0348	26.556	25.4886	25.212	25.3094	26.1031	25.0933					5	5	3	36.6	36.6	25.9	12.909	0	29.655	2670400000	64	0.391017	-0.504032	-0.92424	0.662334	-0.210479	-0.459086	AT3G04920.2;AT3G04920.1	AT3G04920.2;AT3G04920.1	122
AT3G05590	Encodes cytoplasmic ribosomal protein L18.	RIBOSOMAL PROTEIN L18 (RPL18)	RIBOSOMAL PROTEIN L18 (RPL18);RIBOSOMAL PROTEIN EL18Y (EL18Y)	26.2383	26.454	26.4016	26.4434	25.138	27.2621	27.5307	26.6319	25.5733	24.6241	26.6579	25.5994					8	8	2	37.4	37.4	15.5	20.925	0	79.518	2939700000	39	0.650259	-0.256351	-0.47697	0.115121	0.770648	1.84161	AT3G05590.1;AT3G05590.3;AT3G05590.2	AT3G05590.1;AT3G05590.3;AT3G05590.2	124
AT3G08580	mitochondrial ADP/ATP carrier	ADP/ATP CARRIER 1 (AAC1)	ADP/ATP CARRIER 1 (AAC1)	25.2061	25.2471	25.8794	24.9971	25.5448	24.99	25.1153	24.7149	25.0895	25.4787	24.7243	24.9177					6	6	4	16	16	11.3	41.475	0	29.894	2109600000	79	0.384389	0.241165	0.938128	0.303863	0.279881	1.12425	AT3G08580.2;AT3G08580.1	AT3G08580.2;AT3G08580.1	126
AT3G08940	Lhcb4.2 protein (Lhcb4.2, protein involved in the light harvesting complex of photosystem II The mRNA is cell-to-cell mobile.	LIGHT HARVESTING COMPLEX PHOTOSYSTEM II (LHCB4.2)	LIGHT HARVESTING COMPLEX PHOTOSYSTEM II (LHCB4.2)	26.3599	26.6495	26.79	26.5869	26.897	26.9803	26.506	26.4308	26.6143	26.6196	25.85	26.2402					9	9	8	44.3	44.3	35.5	31.193	0	128.41	8087900000	138	0.539095	-0.106953	-0.651112	0.240767	0.265578	1.30168	AT3G08940.2;AT3G08940.1	AT3G08940.2;AT3G08940.1	127
AT3G09260	Encodes beta-glucosidase.The major constituent of ER bodies. One of the most abundant proteins in Arabidopsis seedlings. Exist in an soluble (inactive) and non-soluble (active) form, most probably formed in a polymerization process. Involved in the mutualistic interaction between Arabidopsis and the endophytic fungus Piriformospora indica.	(PYK10)	LONG ER BODY (LEB); (BGLU23); (PYK10); (PSR3.1)	22.7411	23.2992	22.9309	NaN	22.9512	23.0529	23.6243	NaN	23.3095	23.0088	23.2366	24.4403					4	4	4	17.2	17.2	17.2	59.72	0	21.673	558370000	9	0.45633	-0.219092	-0.823814	0.262796	-0.508393	-1.26145	AT3G09260.1	AT3G09260.1	128
AT3G09630	Ribosomal protein L4/L1 family;(source:Araport11)	SUPPRESSOR OF ACAULIS 56 (SAC56)	SUPPRESSOR OF ACAULIS 56 (SAC56);RIBOSOMAL PROTEIN UL4Z (UL4Z)	22.6964	23.2048	23.621	23.594	NaN	23.614	23.4362	NaN	NaN	23.8806	23.8699	24.3733			+	mock_ABA	2	2	2	10.4	10.4	10.4	44.572	0	5.8261	607460000	9	0.495958	-0.246058	-0.748152	0.0472072	-0.762218	-2.61808	AT3G09630.2;AT5G02870.2;AT3G09630.1;AT5G02870.1	AT3G09630.2;AT5G02870.2;AT3G09630.1;AT5G02870.1	130
AT5G02960	Ribosomal protein S12/S23 family protein;(source:Araport11)	RIBOSOMAL PROTEIN US12Y (US12Y)	RIBOSOMAL PROTEIN US12Y (US12Y)	22.3998	NaN	22.369	NaN	23.073	22.8089	NaN	22.4599	NaN	NaN	NaN	NaN					2	2	2	16.2	16.2	16.2	15.735	0	17.965	204170000	12	0.182765	-0.396198	-1.72622	1	NaN	0	AT5G02960.1;AT3G09680.1	AT5G02960.1;AT3G09680.1	131
AT3G12580	Cytoplasmically localized member of the heat shock protein 70 family. Forms complex(heat shock granule) with J3. Mutants are heat sensitive and show increased accummulation of insoluble proteins suggesting a role in thermotolerance.	HEAT SHOCK 70 KDA PROTEIN 4 (HSP70-4)	(HSC70-4);ARABIDOPSIS HEAT SHOCK PROTEIN 70 (ATHSP70);HEAT SHOCK PROTEIN 70 (HSP70);HEAT SHOCK 70 KDA PROTEIN 4 (HSP70-4)	23.5933	NaN	23.5523	NaN	24.0991	22.8231	NaN	24.1017	NaN	NaN	23.7966	24.0651					5	3	1	9.2	6.6	1.8	71.101	0	31.098	380750000	14	0.864864	-0.101852	-0.18523	0.118793	-0.358068	-2.63621	AT3G12580.1;AT5G02500.2;AT1G56410.1;AT1G16030.1;AT3G09440.4;AT3G09440.3;AT3G09440.2;AT3G09440.1;AT5G02490.1	AT3G12580.1;AT5G02500.2;AT1G56410.1;AT1G16030.1;AT3G09440.4;AT3G09440.3;AT3G09440.2;AT3G09440.1;AT5G02490.1	137
AT3G12780	PGK1 was localized exclusively in the chloroplasts of photosynthetic tissues and is the photosynthetic isoform. The pgk1.1 knock-down mutant displayed reduced growth, lower photosynthetic capacity and starch content. Expression studies in PGK mutants showed that PGK1 and PGK3 were down-regulated in pgk3.2 and pgk1.1, respectively. These results indicate that the down-regulation of photosynthetic …	PHOSPHOGLYCERATE KINASE 1 (PGK1)	PHOSPHOGLYCERATE KINASE 1 (PGK1); (PGKP1)	21.682	23.5403	21.8659	23.2859	22.6612	22.0931	24.5046	22.4935	24.2372	22.6175	NaN	24.0886					5	5	5	16.2	16.2	16.2	50.111	0	16.713	758130000	20	0.648054	-0.3446	-0.480254	0.198504	-1.05428	-1.48174	AT3G12780.1;AT1G56190.2;AT1G56190.1;AT1G79550.2;AT1G79550.1	AT3G12780.1;AT1G56190.2;AT1G56190.1	138
AT3G14415	Encodes a glycolate oxidase that modulates reactive oxygen species-mediated signal transduction during nonhost resistance. The mRNA is cell-to-cell mobile.	GLYCOLATE OXIDASE 2 (GOX2)	GLYCOLATE OXIDASE 2 (GOX2)	23.479	23.9708	22.4628	23.8837	24.0068	24.4706	24.0921	23.4188	24.0692	24.692	23.4991	23.6373					6	6	2	25.6	25.6	7.4	40.306	0	136.17	1279600000	61	0.228305	-0.547991	-1.34149	0.275216	-0.525328	-1.20042	AT3G14415.3;AT3G14415.1;AT3G14415.2;AT4G18360.3	AT3G14415.3;AT3G14415.1;AT3G14415.2	141
AT3G20820	Leucine-rich repeat (LRR) family protein;(source:Araport11)	0	0	22.8839	23.7496	24.2611	24.3434	23.1516	24.2652	23.973	23.7066	23.815	24.4316	24.2013	23.8423					3	3	3	11.2	11.2	11.2	39.862	0	29.726	649340000	17	0.9341	0.0353918	0.0862157	0.500147	-0.263078	-0.717302	AT3G20820.1	AT3G20820.1	147
AT3G25520	Encodes ribosomal protein L5 that binds to 5S ribosomal RNA and in involved in its export from the nucleus to the cytoplasm. Identified in a screen for enhancers of as1. as1/pgy double mutants show defects in leaf vascular patterning and adaxial cell fate. Double mutant analysis indicates pgy genes function in the same pathway as REV, KAN1 and KAN2.	RIBOSOMAL PROTEIN L5 (ATL5)	RIBOSOMAL PROTEIN L5 (ATL5);PIGGYBACK3 (PGY3);OLIGOCELLULA 5 (OLI5);RIBOSOMAL PROTEIN L5 A (RPL5A);RIBOSOMAL PROTEIN UL18Z (UL18Z)	25.5297	25.1038	24.9908	24.7017	25.5916	25.0059	24.8503	25.4909	24.6374	24.7078	24.4077	24.0833			+	mock_ABA	5	5	5	14.6	14.6	14.6	34.358	0	56.961	1563100000	49	0.561722	-0.153208	-0.614058	0.0310099	0.622419	2.80376	AT3G25520.3;AT3G25520.1;AT3G25520.2;AT5G39740.2;AT5G39740.1	AT3G25520.3;AT3G25520.1;AT3G25520.2;AT5G39740.2;AT5G39740.1	153
AT3G26650	Encodes one of the two subunits forming the photosynthetic glyceraldehyde-3-phosphate dehydrogenase (GAPDH) and as such a constituent of the supramolecular complex with phosphoribulokinase (PRK) thought to be linked by a small peptide encoded by CP12-2. GapA-1 is coordinately expressed by light with PRK and CP12-2. The enzyme activity, tested in leaf protein extracts dropped significantly after e…	GLYCERALDEHYDE 3-PHOSPHATE DEHYDROGENASE A SUBUNIT (GAPA)	GLYCERALDEHYDE 3-PHOSPHATE DEHYDROGENASE A SUBUNIT 1 (GAPA-1); (GAPA1);GLYCERALDEHYDE 3-PHOSPHATE DEHYDROGENASE A SUBUNIT (GAPA)	23.6859	24.1867	23.9361	23.9594	24.4065	23.5746	24.6423	24.0393	24.3915	24.1357	23.4444	24.0927					8	8	8	28.8	28.8	28.8	42.489	0	125.52	1443000000	55	0.413006	-0.22368	-0.879418	0.754438	-0.0740538	-0.327469	AT3G26650.1;AT1G12900.2;AT1G12900.4;AT1G12900.3;AT1G12900.1;AT1G12900.5	AT3G26650.1;AT1G12900.2;AT1G12900.4;AT1G12900.3;AT1G12900.1;AT1G12900.5	157
AT3G27850	50S ribosomal protein L12-C The mRNA is cell-to-cell mobile.	RIBOSOMAL PROTEIN L12-C (RPL12-C)	RIBOSOMAL PROTEIN L12-C (RPL12-C);RIBOSOMAL PROTEIN BL12CX (BL12CX)	22.3251	22.583	23.3129	23.3659	22.7221	23.0158	NaN	23.2304	23.6066	23.4307	NaN	23.3081					2	2	2	12.3	12.3	12.3	19.682	0	22.719	410400000	16	0.791561	-0.0927561	-0.278801	0.142623	-0.551791	-1.73849	AT3G27850.1;AT3G27830.2;AT3G27830.1	AT3G27850.1;AT3G27830.2;AT3G27830.1	158
AT3G44890	Plastid ribosomal protein CL9 The mRNA is cell-to-cell mobile.	RIBOSOMAL PROTEIN L9 (RPL9)	RIBOSOMAL PROTEIN L9 (RPL9);RIBOSOMAL PROTEIN BL9C (BL9C)	21.872	22.352	22.5057	22.3309	22.4275	22.4919	22.3856	22.1424	22.2197	22.5586	NaN	22.0661					2	2	2	12.2	12.2	12.2	22.134	0	6.5697	188100000	21	0.559521	-0.0967131	-0.61762	0.938826	-0.0163339	-0.0806808	AT3G44890.1	AT3G44890.1	160
AT3G46780	plastid transcriptionally active 16;(source:Araport11)	PLASTID TRANSCRIPTIONALLY ACTIVE 16 (PTAC16)	PLASTID TRANSCRIPTIONALLY ACTIVE 16 (PTAC16)	21.8151	22.1253	21.614	23.1488	NaN	NaN	22.2754	NaN	22.5309	22.1663	NaN	23.3557					3	3	3	10.4	10.4	10.4	54.358	0	15.402	292830000	11	1	-0.0996032	0	0.355277	-0.508506	-1.01824	AT3G46780.1	AT3G46780.1	163
AT3G47470	Encodes a chlorophyll a/b-binding protein that is more similar to the PSI Cab proteins than the PSII cab proteins. The predicted protein is about 20 amino acids shorter than most known Cab proteins.	LIGHT-HARVESTING CHLOROPHYLL-PROTEIN COMPLEX I SUBUNIT A4 (LHCA4)	LIGHT-HARVESTING CHLOROPHYLL-PROTEIN COMPLEX I SUBUNIT A4 (LHCA4); (CAB4)	26.1183	25.5016	26.7041	25.1342	26.2347	26.6285	26.4454	26.0595	25.0525	25.7477	25.1052	24.7893					9	9	9	63.3	63.3	63.3	27.733	0	50.901	3515700000	78	0.241252	-0.477481	-1.30017	0.135787	0.690882	1.72233	AT3G47470.1	AT3G47470.1	164
AT3G53020	RPL24B encodes ribosomal protein L24, homolog of cytosolic RPL24, found in archaea and higher eukaryotes. Arabidopsis has two RPL24 homologs, RPL24A (AT2G36620) and RPL24B. Mutants showed defects in apical-basal gynoecium patterning similar to previously described ett and mp mutants. Transformation of stv1-1 mutant with a uORF-eliminated ETT construct partially suppressed the stv1 gynoecium pheno…	SHORT VALVE1 (STV1)	RIBOSOMAL PROTEIN EL24Y (EL24Y); (RPL24B);SHORT VALVE1 (STV1);RIBOSOMAL PROTEIN L24 (RPL24)	NaN	NaN	24.8674	NaN	NaN	24.9169	25.4585	24.3069	NaN	24.7541	NaN	NaN					2	2	2	12.3	12.3	12.3	18.632	0	26.524	591580000	25	1	-0.0267061	0	1	0.113258	0	AT3G53020.1;AT2G36620.1	AT3G53020.1;AT2G36620.1	169
AT4G00100	Encodes a cytoplasmic ribosomal protein S13 homologue involved in early leaf development The mRNA is cell-to-cell mobile.	RIBOSOMAL PROTEIN S13A (RPS13A)	RIBOSOMAL PROTEIN S13A (RPS13A);POINTED FIRST LEAF 2 (PFL2); (RPS13);RIBOSOMAL PROTEIN S13A (ATRPS13A);RIBOSOMAL PROTEIN US15Y (US15Y)	22.5662	23.578	24.1393	23.9739	23.0122	23.7005	24.2824	23.3617	23.5366	23.8035	24.1023	23.7288					4	4	4	19.9	19.9	19.9	17.085	0	84.293	885410000	44	0.957232	-0.0248575	-0.0559059	0.561648	-0.228456	-0.614176	AT4G00100.1;AT3G60770.1	AT4G00100.1;AT3G60770.1	178
AT3G61470	Encodes a component of the light harvesting antenna complex of photosystem I. The mRNA is cell-to-cell mobile.	PHOTOSYSTEM I LIGHT HARVESTING COMPLEX GENE 2 (LHCA2)	PHOTOSYSTEM I LIGHT HARVESTING COMPLEX GENE 2 (LHCA2)	25.3113	25.095	25.6206	25.1377	25.7729	26.1232	25.2664	25.1126	24.8638	25.4613	24.9436	25.1195					3	3	3	24.9	24.9	24.9	27.755	0	101.36	1682100000	46	0.328968	-0.277618	-1.06232	0.318458	0.194104	1.08775	AT3G61470.1	AT3G61470.1	179
AT4G01050	hydroxyproline-rich glycoprotein family protein, contains a rhodanese homology domain. Required for anchoring the FNR flavoenzyme to the thylakoid membranes and sustaining high efficiency photosynthetic linear electron flow.The mRNA is cell-to-cell mobile.	0	0	21.9114	22.4131	22.5025	NaN	22.3193	NaN	22.5157	22.2503	22.3811	22.703	21.9352	22.647					3	3	3	8.6	8.6	8.6	49.387	0	10.256	189350000	7	0.689617	-0.0860952	-0.429599	0.608608	-0.140916	-0.545884	AT4G01050.1;AT4G01050.2	AT4G01050.1;AT4G01050.2	182
AT4G01150	Integral thylakoid membrane protein required for proper grana stack curvature.	CURVATURE THYLAKOID 1A (CURT1A)	CURVATURE THYLAKOID 1A (CURT1A)	23.3724	24.6904	NaN	23.9666	22.7499	NaN	23.266	23.6829	24.6696	NaN	NaN	NaN					3	3	3	7.3	7.3	7.3	17.697	0	5.9078	767310000	19	0.171514	0.776844	1.66366	1	-0.659862	0	AT4G01150.1	AT4G01150.1	183
AT4G02930	GTP binding Elongation factor Tu family protein;(source:Araport11)	0	0	NaN	21.7089	21.9161	21.8563	21.2369	21.2507	NaN	NaN	22.4058	NaN	NaN	21.7296	+	mock_heat			2	2	2	6.6	6.6	6.6	49.409	0	6.2861	124590000	5	0.00526353	0.58326	7.32132	0.429674	-0.240604	-0.910534	AT4G02930.1	AT4G02930.1	184
AT4G03280	Encodes the Rieske FeS center of cytochrome b6f complex. Gene is expressed in shoot but not in root. Mutant has reduced electron transport at saturating light intensities and Q-cycle activity is hypersensitive to acidification of the thylakoid lumen. The mRNA is cell-to-cell mobile.	PHOTOSYNTHETIC ELECTRON TRANSFER C (PETC)	PHOTOSYNTHETIC ELECTRON TRANSFER C (PETC);PROTON GRADIENT REGULATION 1 (PGR1)	NaN	24.9659	25.1932	24.5031	25.4252	24.6972	24.143	NaN	NaN	24.2735	23.8916	24.4482					2	2	2	14.8	14.8	14.8	22.533	0	7.7337	913660000	13	0.7702	0.132283	0.312606	0.0591203	0.682988	2.61481	AT4G03280.2;AT4G03280.1	AT4G03280.2;AT4G03280.1	185
AT4G04640	One of two genes (with ATPC2) encoding the gamma subunit of Arabidopsis chloroplast ATP synthase.	(ATPC1)	(ATPC1)	22.8727	23.9627	23.6674	23.7313	23.2146	23.1259	22.9036	22.9942	23.45	23.783	23.2487	23.4931					6	6	6	26.8	26.8	26.8	40.911	0	95.21	808460000	25	0.0899296	0.498966	2.01977	0.812462	0.0648465	0.247921	AT4G04640.1	AT4G04640.1	186
AT4G05180	Encodes the PsbQ subunit of the oxygen evolving complex of photosystem II.	PHOTOSYSTEM II SUBUNIT Q-2 (PSBQ-2)	PHOTOSYSTEM II SUBUNIT Q (PSBQ);PHOTOSYSTEM II SUBUNIT Q-2 (PSBQ-2); (PSII-Q)	22.0112	23.4702	23.038	23.8967	23.4738	22.3467	25.003	22.9692	24.3489	NaN	NaN	24.6309					4	4	4	27.4	27.4	27.4	24.643	0	36.344	587160000	17	0.638808	-0.344151	-0.49409	0.086431	-1.38585	-2.26261	AT4G05180.2;AT4G05180.1	AT4G05180.2;AT4G05180.1	187
AT4G10340	photosystem II encoding the light-harvesting chlorophyll a/b binding protein CP26 of the antenna system of the photosynthetic apparatus The mRNA is cell-to-cell mobile.	LIGHT HARVESTING COMPLEX OF PHOTOSYSTEM II 5 (LHCB5)	CHLOROPHYLL PROTEIN 26 (CP26);LIGHT HARVESTING COMPLEX OF PHOTOSYSTEM II 5 (LHCB5)	26.9532	27.2546	26.963	26.3297	26.8087	26.7162	26.8186	26.2933	26.404	26.5166	26.6529	26.1184					12	12	12	45.7	45.7	45.7	30.156	0	323.31	6897200000	121	0.38593	0.215925	0.934884	0.0917463	0.452124	2.00533	AT4G10340.1	AT4G10340.1	190
AT4G10730	Protein kinase superfamily protein	0	0	27.7768	28.6304	28.4552	28.9816	27.9763	28.1561	27.9195	28.1544	28.7135	29.4336	29.0723	28.8979					27	20	20	40.2	30.8	30.8	78.426	0	323.31	41984000000	443	0.166661	0.409425	1.57353	0.103091	-0.568342	-1.92122	AT4G10730.1;AT4G10730.2	AT4G10730.1;AT4G10730.2	191
AT4G12800	Encodes subunit L of photosystem I reaction center.	0	0	24.4008	24.277	24.652	24.9096	25.1231	24.5662	25.3726	24.898	NaN	NaN	25.0203	25.5263					4	4	4	25.6	25.6	25.6	23.051	0	51.563	1473300000	31	0.100095	-0.430084	-1.9425	0.0524313	-0.71341	-2.73022	AT4G12800.1;AT4G12800.2	AT4G12800.1;AT4G12800.2	195
AT4G14480	Encodes a putative Ser/Thr protein kinase, BLUS1 (BLUE LIGHT SIGNALING1). BLUS1 functions as a phototropin substrate and primary regulator of stomatal control to enhance photosynthetic CO2 assimilation under natural light conditions.	BLUE LIGHT SIGNALING1 (BLUS1)	BLUE LIGHT SIGNALING1 (BLUS1)	22.9486	24.0345	24.1871	24.1966	23.8093	23.5785	22.7824	23.4806	23.4298	24.1678	24.0434	23.9008					5	5	5	14.2	14.2	14.2	54.38	0	65.374	958610000	32	0.293509	0.428989	1.15105	0.902044	-0.0437341	-0.128379	AT4G14480.1	AT4G14480.1	196
AT4G19410	Pectinacetylesterase family protein;(source:Araport11)	PECTIN ACETYLESTERASE 7 (PAE7)	PECTIN ACETYLESTERASE 7 (PAE7);PECTIN ACETYESTERASE 7 (ATPAE7)	23.0233	23.5076	23.854	23.4478	NaN	NaN	23.3066	NaN	NaN	NaN	23.4835	23.4118					3	3	3	6.9	6.9	6.9	42.125	0	5.9089	367400000	6	1	0.151576	0	0.969189	0.0105405	0.0410964	AT4G19410.1;AT4G19410.2;AT5G45280.1;AT5G45280.2	AT4G19410.1;AT4G19410.2;AT5G45280.1;AT5G45280.2	198
AT4G20360	Nuclear transcribed, plastid localized EF-Tu translation elongation factor. Referred to as AtRabE1b in DOI:10.1104/pp.013052. However, wider community usage and more publications assign the symbol RabE1b to At5g59840.	RAB GTPASE HOMOLOG E1B (ATRABE1B)	RAB GTPASE HOMOLOG E1B (RABE1b);SUPPRESSOR OF VARIEGATION11 (SVR11);RAB GTPASE HOMOLOG E1B (ATRABE1B); (ATRAB8D); (RAB8D)	24.9915	25.3533	25.3211	25.2807	25.6182	24.9822	25.12	24.8776	25.3862	25.4422	24.4919	25.2248					9	9	9	32.4	32.4	32.4	51.63	0	156.6	2361000000	81	0.652188	0.0871305	0.474101	0.683999	0.100378	0.427404	AT4G20360.2;AT4G20360.1	AT4G20360.2;AT4G20360.1	200
AT4G21280	Encodes the PsbQ subunit of the oxygen evolving complex of photosystem II.	PHOTOSYSTEM II SUBUNIT QA (PSBQA)	PHOTOSYSTEM II SUBUNIT QA (PSBQA);PHOTOSYSTEM II SUBUNIT Q-1 (PSBQ-1);PHOTOSYSTEM II SUBUNIT Q (PSBQ)	22.3572	23.8464	23.2131	24.1768	24.3268	23.2684	25.5215	23.5024	24.6606	23.4276	22.934	24.7952					6	6	6	37.7	37.7	37.7	23.795	0	21.865	1134300000	27	0.28717	-0.756387	-1.16785	0.396437	-0.555949	-0.913017	AT4G21280.1;AT4G21280.2	AT4G21280.1;AT4G21280.2	201
AT4G24100	Protein kinase superfamily protein	0	0	27.772	28.3695	28.8073	28.7474	28.1392	28.4231	27.7615	27.9226	28.486	29.189	28.5034	28.5032					31	31	24	43.9	43.9	34.6	80.672	0	323.31	69672000000	714	0.239749	0.362419	1.30486	0.434388	-0.246368	-0.837516	AT4G24100.4;AT4G24100.1;AT4G24100.3;AT4G24100.2	AT4G24100.4;AT4G24100.1;AT4G24100.3;AT4G24100.2	204
AT4G27090	Cytoplasmic ribosomal protein.Essential gene as homozygotes are lethal and heterozygotes have various defects in gametophyte development and function.	(RPL14B)	(RPL14B);RIBOSOMAL PROTEIN EL14Y (EL14Y)	24.1253	24.8779	23.4342	24.9387	25.0876	24.7752	24.3972	23.9742	24.2497	NaN	NaN	NaN					5	5	5	40.3	40.3	40.3	15.505	0	21.364	796200000	14	0.634866	-0.21452	-0.500021	1	0.0943666	0	AT4G27090.1;AT2G20450.1	AT4G27090.1;AT2G20450.1	207
AT4G28750	mutant has Decreased effective quantum yield of photosystem II; Pale green plants; Reduced growth rate; Subunit E of Photosystem I	PSA E1 KNOCKOUT (PSAE-1)	PSA E1 KNOCKOUT (PSAE-1)	NaN	25.8977	22.9033	25.2523	NaN	22.9414	NaN	NaN	NaN	NaN	24.5025	25.3648					3	3	2	41.3	41.3	32.2	14.967	0	47.731	971520000	9	1	1.74305	0	0.850934	-0.249228	-0.204663	AT4G28750.1	AT4G28750.1	208
AT4G32260	ATPase, F0 complex, subunit B/B, bacterial/chloroplast;(source:Araport11)	PIGMENT DEFECTIVE 334 (PDE334)	PIGMENT DEFECTIVE 334 (PDE334)	25.4439	26.1183	25.9168	25.1104	25.566	25.1575	25.7201	NaN	NaN	NaN	NaN	NaN					3	3	3	15.5	15.5	15.5	23.917	0	69.42	1334000000	20	0.608404	0.166146	0.546204	1	NaN	0	AT4G32260.1	AT4G32260.1	210
AT4G34980	Serine protease similar to subtilisin.	SUBTILISIN-LIKE SERINE PROTEASE 2 (SLP2)	SUBTILISIN-LIKE SERINE PROTEASE 2 (SLP2)	28.1954	28.6024	28.9919	28.8407	28.5064	28.9266	28.5989	28.7255	28.5547	28.9985	28.7951	28.5188					32	32	32	50.7	50.7	50.7	81.045	0	323.31	52579000000	779	0.876553	-0.0317779	-0.162094	0.78421	-0.0592122	-0.286391	AT4G34980.1	AT4G34980.1	215
AT5G01530	Light harvesting chlorophyll-binding protein, CP29 is a component of the PSII light harvesting antenna complex.	LIGHT HARVESTING COMPLEX PHOTOSYSTEM II (LHCB4.1)	LIGHT HARVESTING COMPLEX PHOTOSYSTEM II (LHCB4.1)	28.3603	28.3864	27.7619	27.9571	26.2528	27.6827	NaN	27.418	27.9133	26.5197	27.1183	27.448			+	mock_ABA	4	3	3	20	11.4	11.4	31.139	0	26.015	7567500000	36	0.05898	0.998606	2.43549	0.0396088	0.866627	2.61958	AT5G01530.1	AT5G01530.1	220
AT5G02450	Ribosomal protein L36e family protein;(source:Araport11)	RIBOSOMAL PROTEIN EL36X (EL36X)	RIBOSOMAL PROTEIN EL36X (EL36X)	24.0679	24.7041	24.9255	25.0947	24.5996	24.7517	24.9973	24.8579	24.661	25.1052	25.5524	25.3108					2	2	1	23.1	23.1	10.2	12.189	0	12.517	890480000	30	0.681116	-0.103563	-0.431591	0.168854	-0.459308	-1.56399	AT5G02450.1	AT5G02450.1	221
AT5G08690	Encodes the mitochondrial ATP synthase beta-subunit. This subunit is encoded by a multigene family of three members (At5g08670, At5g08680, At5g08690) that shared 98% sequence identity at the amino acid level. The mRNA is cell-to-cell mobile.	0	0	22.54	23.2788	23.1823	22.7814	NaN	22.1866	23.356	22.4171	23.7771	23.7397	23.0567	23.6755			+	mock_ABA	5	4	4	13.1	11.2	11.2	59.712	0	17.356	347100000	22	0.456386	0.29243	0.806878	0.0437891	-0.616633	-2.54492	AT5G08690.1;AT5G08670.1;AT5G08680.1	AT5G08690.1;AT5G08670.1;AT5G08680.1	223
AT5G09810	Member of Actin gene family.Mutants are defective in germination and root growth. The mRNA is cell-to-cell mobile.	ACTIN 7 (ACT7)	ACTIN 2 (ACT2); (ATACT7);ACTIN 7 (ACT7)	25.2213	25.1441	25.4459	25.511	25.2037	NaN	25.9827	25.1755	25.4723	25.2641	24.9781	25.0988					4	3	1	16.2	11.9	4.2	41.735	0	80.287	1558400000	43	0.635133	-0.123425	-0.504834	0.393757	0.127254	0.918551	AT5G09810.1	AT5G09810.1	225
AT5G11420	Encodes a DUF642 cell wall protein.	0	0	24.7732	24.2785	26.2302	NaN	24.0873	24.9374	24.5867	23.8591	NaN	NaN	NaN	24.9257					2	2	1	7.7	7.7	4.1	39.64	0	21.792	1022900000	31	0.257352	0.726363	1.27804	1	0.16825	0	AT5G11420.1	AT5G11420.1	229
AT5G13490	Encodes mitochondrial ADP/ATP carrier	ADP/ATP CARRIER 2 (AAC2)	ADP/ATP CARRIER 2 (AAC2)	25.1395	NaN	26.184	26.0483	25.7706	NaN	25.887	NaN	NaN	NaN	NaN	NaN					4	2	2	10.6	6	6	41.745	0	11.282	2114400000	27	0.934191	-0.0381635	-0.0896831	1	NaN	0	AT5G13490.2;AT5G13490.1;AT4G28390.2;AT4G28390.1	AT5G13490.2;AT5G13490.1	233
AT5G14040	Encodes a mitochondrial phosphate transporter. Modulates plant responses to salt stress.	PHOSPHATE TRANSPORTER 3;1 (PHT3;1)	PHOSPHATE TRANSPORTER 3;1 (PHT3;1);MITOCHONDRIAL PHOSPHATE TRANSPORTER 3 (MPT3)	23.5534	23.7948	23.9747	23.7201	23.9692	23.5644	NaN	23.4948	NaN	24.2875	NaN	23.5896					5	5	5	11.7	11.7	11.7	40.089	0	9.4942	459260000	10	0.622101	0.0846259	0.524877	0.517439	-0.17774	-0.70904	AT5G14040.1	AT5G14040.1	234
AT5G14740	Encodes a beta carbonic anhydrase likely to be localized in the cytoplasm. Expression of its mRNA is seen in etiolated seedlings and points to a possible nonphotosynthetic role for this isoform.	CARBONIC ANHYDRASE 2 (CA2)	CARBONIC ANHYDRASE 2 (CA2); (DEG12);BETA CARBONIC ANHYDRASE 2 (BETA CA2);CARBONIC ANHYDRASE 18 (CA18)	22.5698	23.49	23.1857	23.6368	22.9503	22.9781	24.0972	22.8539	24.6037	23.1192	22.7585	23.8858					7	7	7	28.2	28.2	28.2	28.344	0	29.782	1026800000	30	0.998596	0.000691414	0.00183421	0.46351	-0.371209	-0.782802	AT5G14740.9;AT5G14740.8;AT5G14740.7;AT5G14740.6;AT5G14740.2;AT5G14740.1;AT3G01500.4;AT3G01500.1;AT5G14740.5;AT5G14740.4;AT5G14740.3;AT3G01500.3;AT3G01500.2	AT5G14740.9;AT5G14740.8;AT5G14740.7;AT5G14740.6;AT5G14740.2;AT5G14740.1;AT3G01500.4;AT3G01500.1;AT5G14740.5;AT5G14740.4;AT5G14740.3;AT3G01500.3;AT3G01500.2	235
AT5G15200	Ribosomal protein S4;(source:Araport11)	RIBOSOMAL PROTEIN US4Z (US4Z)	RIBOSOMAL PROTEIN US4Z (US4Z)	22.0044	22.6312	22.622	23.9625	22.1485	22.7654	21.6445	22.9412	22.7973	23.1512	23.2764	23.474					4	4	4	29.3	29.3	29.3	23.036	0	47.794	421340000	20	0.430014	0.430138	0.845962	0.429603	-0.369688	-0.846759	AT5G15200.1;AT5G15200.2;AT5G39850.1	AT5G15200.1;AT5G15200.2	237
AT5G19780	Encodes an isoform of alpha tubulin. Closely related to adjacent gene TUA3 suggesting recent duplication. The mRNA is cell-to-cell mobile.	TUBULIN ALPHA-5 (TUA5)	TUBULIN ALPHA-5 (TUA5)	25.4831	25.3498	25.0212	25.4175	25.8832	24.8537	25.219	25.03	24.8101	25.3179	25.512	25.0197					6	6	2	20.9	20.9	6.2	49.654	0	76.346	1453400000	40	0.782387	0.0714235	0.28889	0.443311	0.152965	0.820479	AT5G19780.1;AT5G19770.1	AT5G19780.1;AT5G19770.1	240
AT5G55190	A member of RAN GTPase gene family. Encodes a small soluble GTP-binding protein. Likely to be involved in nuclear translocation of proteins. May also be involved in cell cycle progression. Role in seed and endosperm development.	RAN GTPASE 3 (RAN3)	RAN GTPASE 3 (ATRAN3);RAN GTPASE 3 (RAN3)	24.318	NaN	23.7601	NaN	24.2539	23.689	NaN	24.064	NaN	NaN	NaN	NaN					2	2	2	11.3	11.3	11.3	25.079	0	16.568	485780000	11	0.909815	0.0367479	0.123095	1	NaN	0	AT5G55190.1;AT5G20020.1;AT5G20010.1	AT5G55190.1;AT5G20020.1;AT5G20010.1	241
AT5G20290	Ribosomal protein S8e family protein;(source:Araport11)	RIBOSOMAL PROTEIN ES8Z (ES8Z)	RIBOSOMAL PROTEIN ES8Z (ES8Z)	24.3579	24.6629	24.196	25.2149	24.7005	24.1582	NaN	23.5798	25.1135	24.4774	24.3132	23.789					2	2	2	15.3	15.3	15.3	24.993	0	50.734	774100000	18	0.277546	0.461755	1.21804	0.619828	0.18469	0.522831	AT5G20290.1	AT5G20290.1	243
AT5G23060	Encodes a chloroplast-localized protein that modulates cytoplasmic Ca2+ concentration and is crucial for proper stomatal regulation in response to elevations of external Ca2+. Phosphorylation of this protein is dependent on calcium.	CALCIUM SENSING RECEPTOR (CaS)	CALCIUM SENSING RECEPTOR (CaS)	24.5401	25.0713	25.1716	25.2875	24.7952	24.7133	24.9115	24.294	25.2543	25.2428	24.6647	25.0279					8	8	8	25.6	25.6	25.6	41.285	0	121.35	2378900000	60	0.162456	0.339136	1.59215	0.89447	-0.0297661	-0.138376	AT5G23060.1;AT5G23060.2	AT5G23060.1;AT5G23060.2	245
AT5G27770	Ribosomal L22e protein family;(source:Araport11)	RIBOSOMAL PROTEIN EL22Y (EL22Y)	RIBOSOMAL PROTEIN EL22Y (EL22Y)	24.7659	25.2943	23.4034	24.9865	22.6858	24.7501	24.4068	24.3204	24.5244	24.1032	NaN	24.1039					4	4	2	36.3	36.3	20.2	14.047	0	11.307	1112400000	16	0.393381	0.571753	0.919331	0.500163	0.368703	0.726397	AT5G27770.1	AT5G27770.1	246
AT5G28540	Encodes the luminal binding protein BiP, an ER-localized member of the HSP70 family. BiP is composed of an N-terminal ATP binding domain and a C-terminal domain that binds to hydrophobic patches on improperly/incompletely folded proteins in an ATP-dependent manner. Involved in polar nuclei fusion during proliferation of endosperm nuclei.	(BIP1)	(HSP70-11); (BIP1)	22.113	23.6481	22.2829	22.9556	22.3829	21.64	25.2477	26.0558	23.208	24.1962	25.841	25.6029			+	mock_ABA	29	5	5	51	10.9	10.9	73.628	0	196.28	1183700000	85	0.375464	-1.0817	-0.957125	0.0328993	-1.96211	-2.75896	AT5G28540.1;AT5G09590.1;AT4G37910.2;AT4G37910.1	AT5G28540.1	249
AT5G35630	chloroplastic glutamine synthetase The mRNA is cell-to-cell mobile.	GLUTAMINE SYNTHETASE 2 (GS2)	GLUTAMINE SYNTHETASE 2 (GS2);GLUTAMINE SYNTHETASE LIKE 1 (ATGSL1);GLUTAMINE SYNTHETASE 2 (GLN2)	NaN	24.0259	NaN	NaN	22.7711	23.2902	23.7467	NaN	23.6603	NaN	NaN	NaN					2	2	2	6.7	6.7	6.7	47.41	0	3.8521	217480000	4	1	0.756513	0	1	0.365637	0	AT5G35630.3;AT5G35630.2;AT5G35630.1	AT5G35630.3;AT5G35630.2;AT5G35630.1	250
AT5G38410	Encodes a member of the Rubisco small subunit (RBCS) multigene family: RBCS1A (At1g67090), RBCS1B (At5g38430), RBCS2B (At5g38420), and RBCS3B (At5g38410). Functions to yield sufficient Rubisco content for leaf photosynthetic capacity.	RUBISCO SMALL SUBUNIT 3B (RBCS3B)	RUBISCO SMALL SUBUNIT 3B (RBCS3B);RIBULOSE BISPHOSPHATE CARBOXYLASE SMALL CHAIN 1A (RBCS1A)	24.3631	25.39	NaN	23.8676	24.0289	24.9671	26.0253	25.3892	NaN	NaN	23.0388	24.9225					4	3	3	23.6	19	19	19.395	0	19.835	1242800000	17	0.406984	-0.562408	-0.904944	0.582023	0.559618	0.615061	AT5G38410.2;AT5G38420.1;AT5G38410.1;AT5G38410.3;AT5G38430.2;AT5G38430.1	AT5G38410.2;AT5G38420.1;AT5G38410.1;AT5G38410.3;AT5G38430.2;AT5G38430.1	251
AT5G40950	ribosomal protein large subunit 27;(source:Araport11)	RIBOSOMAL PROTEIN LARGE SUBUNIT 27 (RPL27)	RIBOSOMAL PROTEIN LARGE SUBUNIT 27 (RPL27);RIBOSOMAL PROTEIN BL27C (BL27C); (PRPL27)	26.4778	26.7484	25.1976	25.6369	25.8673	25.6314	26.9258	26.6133	25.5315	NaN	25.6361	24.8739					4	4	4	22.7	22.7	22.7	21.737	0	56.128	2398000000	40	0.623763	-0.244276	-0.516834	0.215614	0.668045	1.4172	AT5G40950.1	AT5G40950.1	254
AT5G42020	Luminal binding protein (BiP2) involved in polar nuclei fusion during proliferation of endosperm nuclei.	(HSP70-12)	(HSP70-12)	25.395	25.7297	25.9581	25.7314	25.4067	25.624	27.2595	27.4184	25.6058	26.5214	27.8195	27.8178					29	29	5	49.2	49.2	9.4	74.374	0	323.31	13535000000	291	0.230151	-0.723635	-1.33547	0.0662916	-1.23757	-2.24061	AT5G42020.3;AT5G42020.1;AT5G42020.2	AT5G42020.3;AT5G42020.1;AT5G42020.2	256
AT5G42270	VAR1 contains a conserved motif for ATPase and a metalloprotease characteristic to FtsH proteins, and is targeted into chloroplasts. A VAR1-fusion protein synthesized in vitro exhibited ATPase activity and partial metalloprotease activity. This protein is located to the thylakoid membrane and forms a complex with VAR2. FtsH1 (VAR1) and FtsH5 are interchangeable in thylakoid membranes. Phosphoryla…	VARIEGATED 1 (VAR1)	(FTSH5);VARIEGATED 1 (VAR1)	NaN	23.6432	22.5123	23.0405	NaN	NaN	NaN	23.0023	23.0757	23.3629	22.8553	23.0695					4	4	4	9.5	9.5	9.5	75.231	0	7.3147	475920000	7	1	0.06305	0	0.935431	-0.0255373	-0.08517	AT5G42270.1;AT1G50250.1	AT5G42270.1;AT1G50250.1	257
AT5G54270	Lhcb3 protein is a component of the main light harvesting chlorophyll a/b-protein complex of Photosystem II (LHC II).	LIGHT-HARVESTING CHLOROPHYLL B-BINDING PROTEIN 3 (LHCB3)	LIGHT-HARVESTING CHLOROPHYLL B-BINDING PROTEIN 3 (LHCB3); (LHCB3*1)	25.6435	25.0648	25.3885	24.7814	24.6907	25.6145	24.3316	25.3275	25.1752	25.0943	NaN	24.245					3	3	3	15.8	15.8	15.8	28.706	0	104.42	1500000000	46	0.535491	0.228508	0.657105	0.304993	0.381416	1.14248	AT5G54270.1	AT5G54270.1	261
AT5G56030	A member of heat shock protein 90 (HSP90) gene family. Expressed in all tissues and abundant in root apical meristem, pollen and tapetum. Expression is NOT heat-induced but induced by IAA and NaCl. Interacts with HsfA1d in the cytosol and the nucleus and negatively regulates HsfA1d. Did not bind to AtHsfA4c. The mRNA is cell-to-cell mobile.	HEAT SHOCK PROTEIN 81-2 (HSP81-2)	HEAT SHOCK PROTEIN 81-2 (HSP81-2);HEAT SHOCK PROTEIN 81.2 (HSP81.2)	21.218	21.8819	21.7963	NaN	NaN	21.5703	NaN	21.5644	21.9423	NaN	NaN	21.9623					3	3	3	5.7	5.7	5.7	80.063	0	5.9507	149190000	5	0.825579	0.064688	0.240305	0.319889	-0.320248	-1.18926	AT5G56030.1;AT5G56010.1;AT5G56000.1;AT5G56030.2	AT5G56030.1;AT5G56010.1;AT5G56000.1;AT5G56030.2	263
AT5G65220	Ribosomal L29 family protein;(source:Araport11)	PLASTID RIBOSOMAL PROTEINS OF THE 50S SUBUNIT 29 (PRPL29)	RIBOSOMAL PROTEIN UL29C (UL29C);PLASTID RIBOSOMAL PROTEINS OF THE 50S SUBUNIT 29 (PRPL29)	22.1485	24.1489	24.2862	23.6748	23.6738	23.2172	23.4848	23.2029	24.3359	23.4559	23.9069	23.6213					4	4	4	17.9	17.9	17.9	19.377	0	45.389	778050000	19	0.74694	0.169906	0.33791	0.632048	-0.26544	-0.504273	AT5G65220.1	AT5G65220.1	267
AT5G66570	Encodes a protein which is an extrinsic subunit of photosystem II and which has been proposed to play a central role in stabilization of the catalytic manganese cluster. In <i>Arabidopsis thaliana</i> the PsbO proteins are encoded by two genes: <i>psbO1</i> and <i>psbO2</i>. PsbO1 is the major isoform in the wild-type. In plsp1-1 mutant plastids, the nonmature form of the protein localizes in the…	PS II OXYGEN-EVOLVING COMPLEX 1 (PSBO1)	PS II OXYGEN-EVOLVING COMPLEX 1 (PSBO-1);33 KDA OXYGEN EVOLVING POLYPEPTIDE 1 (OEE1);MANGANESE-STABILIZING PROTEIN 1 (MSP-1);OXYGEN EVOLVING COMPLEX 33 KILODALTON PROTEIN (OE33);PS II OXYGEN-EVOLVING COMPLEX 1 (PSBO1);OXYGEN EVOLVING ENHANCER PROTEIN 33 (OEE33)	NaN	23.8076	24.4013	24.2794	24.9013	NaN	24.7703	24.3656	24.9045	24.449	NaN	24.3866					6	6	2	26.8	26.8	11.7	35.142	0	44.702	758130000	18	0.100257	-0.51624	-2.12956	0.162135	-0.417215	-1.71161	AT5G66570.1	AT5G66570.1	269
AT5G67360	Encodes a subtilisin-like serine protease essential for mucilage release from seed coats.	(ARA12)	SUBTILISIN-LIKE SERINE PROTEASE 1.7 (SBT1.7); (ARA12)	22.955	23.2686	23.4004	NaN	23.4205	NaN	NaN	NaN	NaN	NaN	NaN	NaN					2	2	2	6.5	6.5	6.5	79.414	0	2.6641	145800000	2	1	-0.21247	0	1	NaN	0	AT5G67360.1	AT5G67360.1	270
ATCG00020	Encodes chlorophyll binding protein D1, a part of the photosystem II reaction center core	PHOTOSYSTEM II REACTION CENTER PROTEIN A (PSBA)	PHOTOSYSTEM II REACTION CENTER PROTEIN A (PSBA)	26.3108	26.2954	26.1659	26.5196	25.9105	25.5843	26.0772	25.7733	26.1815	26.4645	26.4261	26.3522	+	mock_heat			5	5	5	15.9	15.9	15.9	38.936	0	130.41	3821700000	50	0.00881626	0.486593	3.81458	0.742385	-0.0331712	-0.344275	ATCG00020.1	ATCG00020.1	271
ATCG00120	Encodes the ATPase alpha subunit, which is a subunit of ATP synthase and part of the CF1 portion which catalyzes the conversion of ADP to ATP using the proton motive force. This complex is located in the thylakoid membrane of the chloroplast.	ATP SYNTHASE SUBUNIT ALPHA (ATPA)	ATP SYNTHASE SUBUNIT ALPHA (ATPA)	26.3985	27.2165	27.0275	27.1422	26.5179	26.8809	26.9815	26.2879	27.1784	27.4716	26.9184	27.0183					18	18	17	41.6	41.6	40.2	55.328	0	323.31	15467000000	261	0.300529	0.279142	1.13279	0.401943	-0.200482	-0.901735	ATCG00120.1	ATCG00120.1	272
ATCG00270	PSII D2 protein	PHOTOSYSTEM II REACTION CENTER PROTEIN D (PSBD)	PHOTOSYSTEM II REACTION CENTER PROTEIN D (PSBD)	25.3746	25.165	25.3407	25.2062	25.0587	25.5975	24.5334	25.1699	25.0293	25.4276	25.495	25.2346					8	8	8	25.2	25.2	25.2	39.547	0	252.91	3298600000	81	0.449438	0.181753	0.808923	0.837373	-0.0249686	-0.214351	ATCG00270.1	ATCG00270.1	275
ATCG00280	chloroplast gene encoding a CP43 subunit of the photosystem II reaction center. promoter contains a blue-light responsive element.	PHOTOSYSTEM II REACTION CENTER PROTEIN C (PSBC)	PHOTOSYSTEM II REACTION CENTER PROTEIN C (PSBC)	29.1433	29.2424	29.3855	29.1851	29.3047	29.2647	28.8743	28.7204	29.4624	29.3035	29.0044	28.9775					10	10	10	29	29	29	51.867	0	155.5	26179000000	153	0.245171	0.198041	1.28805	0.700464	0.0521388	0.403648	ATCG00280.1	ATCG00280.1	276
ATCG00340	Encodes the D1 subunit of photosystem I reaction center.	(PSAB)	(PSAB)	24.7651	25.2767	24.4489	25.1874	25.3615	24.6688	23.8788	25.084	24.5046	24.6736	25.5166	24.8248					8	8	8	17.4	17.4	17.4	82.474	0	97.094	1280100000	32	0.664693	0.17127	0.455612	0.897143	0.0396299	0.134846	ATCG00340.1	ATCG00340.1	277
ATCG00350	Encodes psaA protein comprising the reaction center for photosystem I along with psaB protein; hydrophobic protein encoded by the chloroplast genome.	(PSAA)	(PSAA)	24.1796	24.5689	25.4067	24.8407	24.2539	24.7278	24.3474	24.674	24.686	24.9464	25.1323	25.3065					8	8	8	14.7	14.7	14.7	83.23	0	65.532	1863200000	60	0.414738	0.248222	0.875964	0.389719	-0.268809	-0.926946	ATCG00350.1	ATCG00350.1	278
ATCG00480	chloroplast-encoded gene for beta subunit of ATP synthase	ATP SYNTHASE SUBUNIT BETA (PB)	ATP SYNTHASE SUBUNIT BETA (ATPB);ATP SYNTHASE SUBUNIT BETA (PB); (CF1BETA); (ATHCF1BETA)	25.0103	25.279	25.5548	25.2467	25.4408	25.1079	25.4921	25.1175	25.1213	25.5144	25.1117	25.2965					19	19	18	62.4	62.4	60.2	53.933	0	323.31	6994500000	233	0.91494	-0.0168819	-0.11139	0.938701	0.0117202	0.0801802	ATCG00480.1	ATCG00480.1	281
ATCG00490	large subunit of RUBISCO. Protein is tyrosine-phosphorylated and its phosphorylation state is modulated in response to ABA in Arabidopsis thaliana seeds.	(RBCL)	(RBCL)	26.5062	26.9867	26.3403	26.8075	27.0549	26.7676	27.5465	26.7703	27.065	26.4682	24.8992	26.9181					15	15	15	38.6	38.6	38.6	52.954	0	323.31	9771000000	114	0.160734	-0.374642	-1.59992	0.555586	0.322571	0.624013	ATCG00490.1	ATCG00490.1	282
ATCG00540	Encodes cytochrome f apoprotein; involved in photosynthetic electron transport chain; encoded by the chloroplast genome and is transcriptionally repressed by a nuclear gene HCF2.	PHOTOSYNTHETIC ELECTRON TRANSFER A (PETA)	PHOTOSYNTHETIC ELECTRON TRANSFER A (PETA)	21.0003	21.2895	22.9447	NaN	21.2533	NaN	21.4571	21.2059	21.0545	21.4286	NaN	NaN					3	3	3	10.3	10.3	10.3	35.356	0	5.2894	104680000	14	0.511545	0.439403	0.719651	0.571334	0.503277	0.633626	ATCG00540.1	ATCG00540.1	283
ATCG00680	encodes for CP47, subunit of the photosystem II reaction center.	PHOTOSYSTEM II REACTION CENTER PROTEIN B (PSBB)	PHOTOSYSTEM II REACTION CENTER PROTEIN B (PSBB)	26.7757	27.4458	26.9545	27.1426	26.9841	27.2661	27.2041	26.6579	27.1797	27.0899	26.6147	27.0726					12	12	12	26.6	26.6	26.6	56.036	0	323.31	13395000000	181	0.803495	0.051621	0.260082	0.653332	0.0904326	0.472403	ATCG00680.1	ATCG00680.1	284
ATCG00720	Encodes the cytochrome b(6) subunit of the cytochrome b6f complex.	PHOTOSYNTHETIC ELECTRON TRANSFER B (PETB)	PHOTOSYNTHETIC ELECTRON TRANSFER B (PETB)	24.0476	24.3817	NaN	24.5927	24.1683	23.6338	23.7111	24.1251	24.1821	24.0997	23.9664	24.4683					4	4	4	20.5	20.5	20.5	24.152	0	27.918	897690000	32	0.0959305	0.431091	2.04764	0.417202	0.161544	0.883938	ATCG00720.1	ATCG00720.1	286
GFP_TOT3;AT5G14720	#N/A	#N/A	#N/A	30.3825	30.8426	30.5893	30.818	30.8224	30.855	30.696	30.7927	30.4739	31.2347	31.0269	31.0501					40	40	40	44.2	44.2	44.2	102.72	0	323.31	311950000000	1539	0.283979	-0.133438	-1.17643	0.192888	-0.288316	-1.46645	GFP_TOT3;AT5G14720.2;AT5G14720.1;CON__Q9U6Y5;AT1G79640.6;AT1G79640.4;AT1G79640.3;AT1G79640.2;AT1G79640.5;AT1G79640.1	GFP_TOT3;AT5G14720.2;AT5G14720.1	321

## Sheet: S3B
Extended Data Table 3B. Detected TOT3 phosphosites by mass spectrometry after GFP-TOT3 pulldown from Arabidopsis seedlings in the 3 indicated conditions (mock, heat and ABA)
Protein	C: Amino acid	Positions within proteins	mock_1	mock_2	mock_3	mock_4	heat_1	heat_2	heat_3	heat_4	ABA_1	ABA_2	ABA_3	ABA_4	C: Student's T-test Significant mock_heat	C: Student's T-test significant	C: Student's T-test Significant mock_ABA	C: Student's T-test significant_	C: Charge	C: Multiplicity	N: Localization prob	N: PEP	N: Score	N: Delta score	N: Score for localization	N: Mass error [ppm]	N: Intensity	N: Position	N: Student's T-test p-value mock_heat	N: Student's T-test Difference mock_heat	N: Student's T-test Test statistic mock_heat	N: Student's T-test p-value mock_ABA	N: Student's T-test Difference mock_ABA	N: Student's T-test Test statistic mock_ABA	T: Proteins	T: Sequence window	T: id	T: Unique identifier	M: Number of Phospho (STY)	M: Protein group IDs
TOT3	S	448	25.055	25.2967	24.1302	25.7971	23.9009	23.4193	23.4423	24.1351	26.745	26.1635	26.424	26.3236	+	mock_heat	+	mock_ABA	3	___1	0.999927	4.70237e-140	158.77	144.9	119.36	-0.94955	571100000	689	0.0138091	1.34537	3.43952	0.0109431	-1.34425	-3.63169	GFP_TOT3;AT5G14720.2;AT5G14720.1	KDANVNSGQQLLTKASIGSLAETTKEEDTAA	56	UID39	1	321
TOT3	S	549	29.698	NaN	24.7518	31.2001	24.7217	NaN	27.5733	28.5324	31.1268	31.1684	30.8733	31.1952					3	___1	0.999999	8.78782e-10	121.45	72.655	76.82	-0.20446	13567000000	790	0.516058	1.60749	0.711519	0.180241	-2.54095	-1.55683	GFP_TOT3;AT5G14720.2;AT5G14720.1	HVEHKGRFKVTSADLSPKGSTNSTFTPFSGG	57	UID40	1	321
TOT3	S	333	28.4907	27.6861	25.3188	27.9401	27.2421	25.225	25.2918	26.7104	27.9104	27.7943	27.4226	27.8841					2	___1	1	1.86338e-33	144.27	115.19	99.531	1.1247	2662500000	574	0.201288	1.24155	1.43502	0.598796	-0.393953	-0.555254	GFP_TOT3;AT5G14720.2;AT5G14720.1	EYEAHLSQQEYIRGISAWNFNLEDLKTQAAL	58	UID41	1	321
TOT3	S	491	NaN	24.6005	19.7798	26.3174	NaN	NaN	21.9151	NaN	25.6943	26.4046	NaN	24.9099					2	___1	0.828173	1.01128e-26	127.76	121.37	127.76	0.50006	321200000	732	1	1.65083	0	0.353038	-2.10373	-1.04983	GFP_TOT3;AT5G14720.2;AT5G14720.1	QKKYLSGSIIPESTFSPKRITSDADREFQQR	60	UID42	1	321
TOT3	S	613	25.3108	23.1428	23.7914	NaN	23.6442	23.6218	23.5299	24.0306	24.1297	24.537	NaN	NaN					2	___1	0.996293	1.83449e-146	151.31	139.89	78.794	-0.55575	1000200000	854	0.52795	0.375042	0.677867	0.784779	-0.251717	-0.298535	GFP_TOT3;AT5G14720.2;AT5G14720.1	RLIKYLEQTSAKQPGSPETNVDDLLQTPPAT	61	UID43	1	321
TOT3	S	350	27.6625	28.7077	27.5239	30.1398	24.9946	26.6561	25.3815	26.1089	30.5285	NaN	28.8508	28.8867	+	mock_heat			3	___1	0.999659	4.83383e-199	178.32	164.01	139.79	0.12964	5788100000	591	0.00856629	2.72319	3.83926	0.332656	-0.913548	-1.07214	GFP_TOT3;AT5G14720.2;AT5G14720.1	WNFNLEDLKTQAALISDDDTSHAEEPDFNQK	62	UID44	1;2	321
