# Supplementary material for: A conserved signaling axis integrates conflicting environmental drought and heat signals to control stomatal aperture in plants
Source: Research Square preprint supplement (doi:10.21203/rs.3.rs-3228667/v1), 2023-08-18
Supplement: Supplementary file 2 [file 3fc072f5fa6fc06001c46956.xlsx]

## Sheet: S1A
Extended Data Table 1A. AHA1 phosphosites detected by mass spectrometry after AHA1 pulldown in the presence of the indicated TOT3 variants (TOT3, TOT3-KD, TOT3-3E, and TOT3-5A)
T: Leading proteins	Position in AHA1	C: Amino acid	TOT3KD-AHA1_1	TOT3KD-AHA1_2	TOT3KD-AHA1_3	TOT3KD-AHA1_4	TOT3-3E-AHA1_1	TOT3-3E-AHA1_2	TOT3-3E-AHA1_3	TOT3-3E-AHA1_4	TOT3-AHA1_1	TOT3-AHA1_2	TOT3-AHA1_3	TOT3-AHA1_4	TOT3-5A-AHA1_1	TOT3-5A-AHA1_2	TOT3-5A-AHA1_3	TOT3-5A-AHA1_4	C: Charge	C: Multiplicity	N: Localization prob	N: PEP	N: Score	N: Delta score	N: Score for localization	N: Mass error [ppm]	N: Intensity	N: Position	T: Proteins	T: Positions within proteins	T: Leading proteins	T: Protein	T: Sequence window	T: id	T: Unique identifier	M: Number of Phospho (STY)	M: Protein group IDs
RFP-AHA1	2	S	27.4841	27.5097	27.7331	28.0012	26.6978	26.0854	26.6105	26.5288	27.7347	27.696	27.0562	26.9966	28.0549	27.8844	27.5522	27.193	2	___1	1	3.13047e-127	318.9	286.16	163.85	0.13821	24557000000	238	RFP-AHA1	238	RFP-AHA1	RFP-AHA1	TGADITSLYKKAGSMSGLEDIKNETVDLEKI	36	UID18	1;2	2065
RFP-AHA1	2	S	NaN	NaN	25.1674	24.6737	NaN	NaN	NaN	NaN	24.7762	24.5106	NaN	NaN	25.2487	24.5535	25.4795	NaN	2	___2	1	3.13047e-127	318.9	286.16	163.85	0.13821	24557000000	238	RFP-AHA1	238	RFP-AHA1	RFP-AHA1	TGADITSLYKKAGSMSGLEDIKNETVDLEKI	36	UID81	1;2	2065
RFP-AHA1	11	T	25.9413	25.0184	25.8597	25.9086	25.2941	25.4739	25.5818	24.9319	25.6649	26.0109	25.604	25.8412	NaN	25.0015	25.713	NaN	3	___1	1	4.6229e-64	225.73	210.04	225.73	-0.61894	876090000	247	RFP-AHA1	247	RFP-AHA1	RFP-AHA1	KKAGSMSGLEDIKNETVDLEKIPIEEVFQQL	87	UID49	1	2065
RFP-AHA1	899	S	28.303	26.8853	27.3911	27.2754	27.3202	27.9926	27.9348	26.5919	27.4026	27.3339	27.4441	27.7007	27.3649	27.3406	27.5374	27.5885	2	___1	1	2.46532e-34	203.94	191.33	192.65	1.5143	4192200000	1135	RFP-AHA1	1135	RFP-AHA1	RFP-AHA1	GLQPKEDVNIFPEKGSYRELSEIAEQAKRRA	37	UID19	1	2065
RFP-AHA1	948	T	30.6969	30.5102	30.7017	30.5074	30.8627	30.8634	31.1342	30.2921	31.6302	31.6889	31.2119	31.6161	32.1887	31.6686	32.0614	31.4936	2	___1	1	1.2063e-40	248.19	228.56	248.19	-0.20196	47259000000	1184	RFP-AHA1	1184	RFP-AHA1	RFP-AHA1	AKLKGLDIDTAGHHYTV______________	88	UID50	1	2065

## Sheet: S1B
Extended Data Table 1B. AHA1 protein detected by mass spectrometry after AHA1 pulldown in the presence of the indicated TOT3 variants (TOT3, TOT3-KD, TOT3-3E, and TOT3-5A)
T: Protein IDs	TOT3KD-AHA1_1	TOT3KD-AHA1_2	TOT3KD-AHA1_3	TOT3KD-AHA1_4	TOT3-3E-AHA1_1	TOT3-3E-AHA1_2	TOT3-3E-AHA1_3	TOT3-3E-AHA1_4	TOT3-AHA1_1	TOT3-AHA1_2	TOT3-AHA1_3	TOT3-AHA1_4	TOT3-5A-AHA1_1	TOT3-5A-AHA1_2	TOT3-5A-AHA1_3	TOT3-5A-AHA1_4	N: Peptides	N: Razor + unique peptides	N: Unique peptides	N: Sequence coverage [%]	N: Unique + razor sequence coverage [%]	N: Unique sequence coverage [%]	N: Mol. weight [kDa]	N: Q-value	N: Score	N: Intensity	N: MS/MS count	T: Majority protein IDs	T: id
RFP-AHA1;Niben101Scf01771g00005.1	39.8395	39.5364	39.7554	39.7043	38.9366	39.2112	39.3741	38.7917	39.6915	39.5759	39.167	39.5364	39.8802	39.6562	39.7787	39.6231	139	139	107	81.9	81.9	67.3	130.79	0	323.31	15295000000000	79145	RFP-AHA1	2065
