# Supplementary material for: A conserved signaling axis integrates conflicting environmental drought and heat signals to control stomatal aperture in plants
Source: Research Square preprint supplement (doi:10.21203/rs.3.rs-3228667/v1), 2023-08-18
Supplement: Supplementary file 3 [file 812f53743d33ae93586f2ff8.xlsx]

## Sheet: List
Extended Data Table 5. List of primers, nucleotide oligomers or short sequences used in this study.
Primer_ID	Sequence	Application	Note
Actin-Fwd	GGCTCCTCTTAACCCAAAGGC	qPCR	Housekeeping gene
Actin-Rev	CACACCATCACCAGAATCCAGC	qPCR	Housekeeping gene
EEF1a4_Fwd	CTGGAGGTTTTGAGGCTGGTAT	qPCR	Housekeeping gene
EEF1a4_Rev	CCAAGGGTGAAAGCAAGAAGA	qPCR	Housekeeping gene
qHSP70-Fwd	GAAGTACAAGGCTGAGGATGAAGAAC	qPCR
qHSP70-Rev	CTTCTCGTCCTTGATCGTGTTCC	qPCR
qTOT3_Fwd	TGGTCATGCCCCATTTTCCA	qPCR
qTOT3_Rev	CCAGGCATGTACCCACCATT	qPCR
qAHA1_Fwd	GGAAAGAGGGGGAGAAAATG	qPCR
qAHA1_Rev	GGAGCCAATATCCTTGACGA	qPCR
qOST1_Fwd	CTCCTGCAGGCACTCAGAAT	qPCR
qOST1_Rev	CTCCGCTACTGTCGATGTCA	qPCR
LB_salk	ATTTTGCCGATTTCGGAAC	Genotyping
tot3-2-LP	TAACATGGTGGGGAAGTGATC	Genotyping
tot3-2-RP	AAAAGTGCAACAACGATCTGG	Genotyping
ost1-3_LP	CATATCTTTAGACGAGGGGCC	Genotyping
ost1-3_RP	GTGAGTGGTCCAATGGATTTG	Genotyping
ost2-2D_L169F_Fwd	CGCCACTCTTCATCTTCCGA	Genotyping
ost2-2D_L169F_Rev	GGAGCACCTTTGCTGACTCT	Genotyping
ost2-2D_G867S_Fwd	GGTACAGGTGCTTCAGGGAC	Genotyping
ost2-2D_G867S_Rev	TCCCTCGAATGTGAGTTCGC	Genotyping
TOT3 promoter_F2	TTCGGTTCAGTACATGGT	Sequence
TOT3 promoter_F3	CCGTTTCTCTTAGCTCCTC	Sequence
TOT3_CDS_L1	GCAGCAACTACATGGATA	Sequence
TOT3_CDS_L2	ATCTGCTCTTTCCCCTGA	Sequence
TOT3_D157N_Fwd	GCTGATACTCCAAAGTTTGCTAACTTAACGGCACCAT	Cloning
TOT3_D157N_Rev	ATGGTGCCGTTAAGTTAGCAAACTTTGGAGTATCAGC	Cloning
TOT3 promoter_F1	TTTTGGTCTCAACCTGAACAATATCCAGAGCTTG	Cloning
TOT3 promoter_R1	TTTTGGTCTCATGTTAATTTTTACTTTATAATCTTCTTATAGCATATATGC	Cloning
OST1_CDS_Fwd	TTTTGGTCTCAGGCTCCATGGATCGACCAGCAGTG	Cloning	Goldengate
OST1_CDS_Rev	TTTTGGTCTCACTGATCACATTGCGTACACAATC	Cloning	Goldengate
TOT3_CDS_attb1	GGGGACAAGTTTGTACAAAAAAGCAGGCTATGGAATCGGGTTCAGAG	Cloning	Gateway
TOT3_CDS_attb2	GGGGACCACTTTGTACAAGAAAGCTGGGTTCAATCATTTCTGTGTGTT	Cloning	Gateway
AHA1_CDS_attb1	GGGGACAAGTTTGTACAAAAAAGCAGGCTCCATGTCAGGTCTCGAAGATAT	Cloning	Gateway
AHA1_CDS_attb2	GGGGACCACTTTGTACAAGAAAGCTGGGTGCTACACAGTGTAGTGATGT	Cloning	Gateway
OST1_CDS_attb1	GGGGACAAGTTTGTACAAAAAAGCAGGCTCCACCATGGATCGACCAGCAGTGAGTGG	Cloning	Gateway
OST1_CDS_attb2	GGGGACCACTTTGTACAAGAAAGCTGGGTCTCACATTGCGTACACAATCTCTCC	Cloning	Gateway
attb_TOT3K365-N465_Fwd	GGGGACAAGTTTGTACAAAAAAGCAGGCTCCAAGCAATGTGAAAGACAG	Cloning	Gateway
attb_TOT3K365-N465_Rev	GGGGACCACTTTGTACAAGAAAGCTGGGTGGTTTTGTGCTGCAGTGTCCTC	Cloning	Gateway
TOT3K365-N465_Fwd	CCGAAAACCTGTACTTCCAGGGAAAGCAATGTGAAAGACAGG	Cloning	Gibson MBP-TOT3-His
MBP_AHA1_E905_Fwd	CCGAAAACCTGTACTTCCAGGGAGAGATCGCAGAGCAAGCCAAG	Cloning	Gibson MBP_AHA1_His
MBP_AHA1_T948A_rev	TAGTGATGGTGGTGATGGTGCCCCACAGCGTAGTGATGTCCTGCTG	Cloning	Gibson MBP_AHA1_T948A_His
MBP_AHA1_WT_rev	TAGTGATGGTGGTGATGGTGCCCCACAGTGTAGTGATGTCCTGCTG	Cloning	Gibson MBP_AHA1_WT_His
TOT3-Gibs-Fwd	GAAAACCTGTACTTCCAGGGAATGGAATCGGGTTCAGAGAAA	Cloning	Gibson
TOT3-Gibs-6xHis-Rev	TTAGTGATGGTGGTGATGGTGCCCATCATTTCTGTGTGTTAATGC	Cloning	Gibson
MBP-Fwd	GACCATAGATTATGAAAATCGAAGAAGGTAAACTGGTAAT	Cloning	Gibson
MBP-Rev	CTGGAAGTACAGGTTTTCGGGCCCAGTCTGCGCGTCTTTCAGGG	Cloning	Gibson
pDEST-MBP_backbone_Fwd	CACCATCACCACCATCACTAACACCCAGCTTTCTTGTACAA	Cloning	Gibson
pDEST-MBP_backbone_Rev	GATTTTCATAATCTATGGTCCTTGTTGGTGAAGTGCTCGT	Cloning	Gibson
TOT3ns_attb32_Fwd	GGGGACAACTTTGTATAATAAAGTTGCCATGGAATCGGGTTCAGAGA	Cloning	Gateway
TOT3ns_attb32_Rev	GGGGACCACTTTGTACAAGAAAGCTGGGTGATCATTTCTGTGTGTTAATG	Cloning	Gateway
GST_attb32_Fwd	GGGGACAACTTTGTATAATAAAGTTGCCATGTCCCCTATACTAGGTTATTG	Cloning	Gateway
GST_attb32_Rev	GGGGACCACTTTGTACAAGAAAGCTGGGTGTTTTGGAGGATGGTCGCCA	Cloning	Gateway
AHA1ns_attb14_Fwd	GGGGACAAGTTTGTACAAAAAAGCAGGCTCCATGTCAGGTCTCGAAGATA	Cloning	Gateway
AHA1ns_attb14_Rev	GGGGACAACTTTGTATAGAAAAGTTGGGTGCACAGTGTAGTGATGTCCTG	Cloning	Gateway
OST1ns_attb14_Fwd	GGGGACAAGTTTGTACAAAAAAGCAGGCTCCATGGATCGACCAGCAGTGAG	Cloning	Gateway
OST1ns_attb14_Rev	GGGGACAACTTTGTATAGAAAAGTTGGGTGCATTGCGTACACAATCTCTC	Cloning	Gateway
