# Supplementary material for: A conserved signaling axis integrates conflicting environmental drought and heat signals to control stomatal aperture in plants
Source: Research Square preprint supplement (doi:10.21203/rs.3.rs-3228667/v1), 2023-08-18
Supplement: Supplementary file 4 [file cad6c18e183d1e355a55db75.xlsx]

## Sheet: S2A
Extended Data Table 2A. TOT3 phosphosites detected by mass spectrometry after TOT3 pulldown in the 4 indicated conditions (no ABA, ABA, OST1 and no ABA, and OST1 with ABA)
T: Proteins	T: Positions within proteins	C: Amino acid	TOT3_NoABA-1	TOT3_NoABA-2	TOT3_NoABA-3	TOT3_NoABA-4	TOT3_ABA-1	TOT3_ABA-2	TOT3_ABA-3	TOT3_ABA-4	TOT3_OST1_NoABA-1	TOT3_OST1_NoABA-2	TOT3_OST1_NoABA-3	TOT3_OST1_NoABA-4	TOT3_OST1_ABA-1	TOT3_OST1_ABA-2	TOT3_OST1_ABA-3	TOT3_OST1_ABA-4	C: Charge	C: Multiplicity	N: Localization prob	N: PEP	N: Score	N: Delta score	N: Score for localization	N: Mass error [ppm]	N: Intensity	N: Position	T: Leading proteins	T: Protein	T: Sequence window	T: id	T: Unique identifier	M: Number of Phospho (STY)	M: Protein group IDs
TOT3	317	S	NaN	25.8369	25.1025	25.4047	NaN	25.9306	26.2386	26.2318	25.4295	26.0881	25.8625	25.9347	25.9632	25.8691	26.1458	26.2391	3	___1	0.990781	6.49854e-05	90.37	73.838	90.37	0.4782	884150000	317	TOT3	TOT3	RQIKSKEADLLMQNKSEYEAHLSQQEYIRGI	9	UID6	1	103
TOT3	324	S	28.0722	28.0494	27.0539	28.1473	28.4338	28.7646	28.6575	28.6724	28.5291	28.6093	27.6136	27.9835	29.0695	28.8859	28.8048	28.7187	3	___1	1	6.40311e-37	248.06	223.34	186.75	0.94584	9234300000	324	TOT3	TOT3	ADLLMQNKSEYEAHLSQQEYIRGISAWNFNL	10	UID7	1	103
TOT3	333	S	30.9455	29.9862	31.5302	31.2336	30.299	30.7017	31.16	30.9892	31.4814	30.8888	30.8693	31.454	31.351	31.1256	31.2669	30.9264	2	___1	1	3.00248e-26	218.16	178.09	157.52	0.19184	39588000000	333	TOT3	TOT3	EYEAHLSQQEYIRGISAWNFNLEDLKTQAAL	15	UID12	1	103
TOT3	350	S	31.7205	29.8466	31.7185	32.2438	31.5047	32.504	31.8859	32.5323	31.6484	32.1708	31.6596	31.7449	32.2148	32.1924	32.1384	32.712	2	___1	0.999999	4.60773e-123	338.16	300.14	338.16	0.2018	107070000000	350	TOT3	TOT3	WNFNLEDLKTQAALISDDDTSHAEEPDFNQK	16	UID13	1;2	103
TOT3	350	S	25.0109	24.6963	25.4969	26.0261	NaN	25.5824	24.9307	25.7678	25.1937	25.6691	25.3495	NaN	25.66	24.9249	24.6858	25.7494	2	___2	0.999999	4.60773e-123	338.16	300.14	338.16	0.2018	107070000000	350	TOT3	TOT3	WNFNLEDLKTQAALISDDDTSHAEEPDFNQK	16	UID107	1;2	103
TOT3	382	S	25.5268	22.8998	NaN	NaN	NaN	NaN	NaN	NaN	NaN	NaN	24.9882	NaN	28.2324	28.172	26.9556	27.9645	3	___2	0.816701	9.30281e-11	122.43	101.38	72.595	-0.45575	5852500000	382	TOT3	TOT3	CERQDESALSPERASSSATAPSQDDELNDIH	5	UID98	1;2	103
TOT3	385	T	NaN	NaN	NaN	26.3648	26.3768	26.8391	NaN	NaN	NaN	26.7666	NaN	NaN	28.6637	27.7055	27.3826	28.0894	4	___2	0.985286	2.55591e-07	103.85	96.866	74.258	0.96997	3029000000	385	TOT3	TOT3	QDESALSPERASSSATAPSQDDELNDIHDLE	63	UID131	1;2;3	103
TOT3	385	T	NaN	NaN	24.1846	NaN	NaN	23.2271	25.3092	23.4005	NaN	NaN	NaN	NaN	25.7471	23.8575	NaN	22.8129	4	___3	0.985286	2.55591e-07	103.85	96.866	74.258	0.96997	3029000000	385	TOT3	TOT3	QDESALSPERASSSATAPSQDDELNDIHDLE	63	UID225	1;2;3	103
TOT3	388	S	NaN	NaN	24.1846	NaN	NaN	23.2271	25.3092	23.4005	NaN	NaN	NaN	NaN	25.7471	23.8575	NaN	22.8129	3	___3	0.993989	0.000255022	68.049	58.114	54.011	-0.38777	1885900000	388	TOT3	TOT3	SALSPERASSSATAPSQDDELNDIHDLESSF	7	UID193	1;3	103
TOT3	421	S	28.1764	29.5242	29.3795	29.6816	29.0738	29.7557	29.8518	29.7853	29.0222	30.0445	28.2303	27.9927	29.9183	28.7215	29.2673	29.1837	2	___1	1	1.31573e-79	294.05	269	294.05	-0.031257	25380000000	421	TOT3	TOT3	FPIKPLQALKGCFDISEDEDNATTPDWKDAN	14	UID11	1;2	103
TOT3	421	S	28.3448	28.5284	28.0019	27.992	28.7124	28.9863	29.1607	29.0174	27.2796	28.6749	27.8271	27.5675	28.5408	28.8651	28.9846	28.8588	2	___2	1	1.31573e-79	294.05	269	294.05	-0.031257	25380000000	421	TOT3	TOT3	FPIKPLQALKGCFDISEDEDNATTPDWKDAN	14	UID105	1;2	103
TOT3	428	T	NaN	29.1303	29.2283	29.2443	NaN	NaN	NaN	NaN	NaN	29.952	29.727	NaN	NaN	NaN	30.593	30.2275	3	___1	0.852727	6.54985e-28	186.56	159.23	100.06	-1.5067	8397400000	428	TOT3	TOT3	ALKGCFDISEDEDNATTPDWKDANVNSGQQL	65	UID38	1;2	103
TOT3	429	T	NaN	26.4843	26.7809	27.1605	28.716	29.6858	29.7593	29.3341	27.3534	28.2001	25.6701	25.3374	29.4776	27.9923	28.9147	28.8367	2	___1	0.999304	4.93443e-78	294.22	268.86	294.22	-0.38243	30615000000	429	TOT3	TOT3	LKGCFDISEDEDNATTPDWKDANVNSGQQLL	66	UID39	1;2	103
TOT3	429	T	26.3256	24.8599	25.6136	25.6765	26.3176	27.8437	27.2329	27.3568	24.7951	26.4529	26.0407	25.0938	26.9949	27.1799	25.3887	26.469	2	___2	0.999304	4.93443e-78	294.22	268.86	294.22	-0.38243	30615000000	429	TOT3	TOT3	LKGCFDISEDEDNATTPDWKDANVNSGQQLL	66	UID133	1;2	103
TOT3	448	S	28.1869	28.2635	27.5323	28.154	29.2237	29.4733	29.5746	29.2767	28.7595	29	28.5733	28.6592	32.4884	32.5053	32.2799	32.3046	3	___1	1	3.75026e-91	291.07	255.85	179.67	-0.13594	96592000000	448	TOT3	TOT3	KDANVNSGQQLLTKASIGSLAETTKEEDTAA	1	UID1	1;2	103
TOT3	448	S	NaN	25.6238	NaN	25.6433	25.7142	26.2507	26.7943	26.8389	25.4827	26.0477	NaN	NaN	29.6768	29.2674	30.2485	30.4781	3	___2	1	3.75026e-91	291.07	255.85	179.67	-0.13594	96592000000	448	TOT3	TOT3	KDANVNSGQQLLTKASIGSLAETTKEEDTAA	1	UID95	1;2	103
TOT3	451	S	NaN	25.6238	NaN	25.6433	25.7142	26.2507	26.7943	26.8389	25.4827	26.0477	NaN	NaN	29.6768	29.2674	30.2485	30.4781	3	___2	0.999999	2.18388e-63	239.57	223.79	179.67	-0.13594	13308000000	451	TOT3	TOT3	NVNSGQQLLTKASIGSLAETTKEEDTAAQNT	2	UID96	1;2	103
TOT3	467	S	26.7828	26.9932	25.8109	26.7792	27.6258	27.7156	27.4358	27.5092	26.6524	26.9855	26.7523	NaN	NaN	27.5971	NaN	NaN	3	___1	0.946695	6.6425e-50	238.8	203.25	226.4	-0.46547	1777600000	467	TOT3	TOT3	LAETTKEEDTAAQNTSLPRHVISEQKKYLSG	3	UID3	1	103
TOT3	481	S	26.1718	25.6203	25.5449	26.0091	26.671	27.3342	27.2824	27.1639	25.9989	26.4983	26.0969	25.9213	27.9376	28.0825	27.8413	27.9728	2	___1	0.999941	1.89165e-21	190.55	167.31	160.78	0.66455	8366200000	481	TOT3	TOT3	TSLPRHVISEQKKYLSGSIIPESTFSPKRIT	25	UID14	1;2	103
TOT3	481	S	NaN	NaN	NaN	NaN	NaN	25.3209	NaN	25.2926	NaN	NaN	NaN	NaN	26.0401	25.6276	25.5393	25.7782	2	___2	0.999941	1.89165e-21	190.55	167.31	160.78	0.66455	8366200000	481	TOT3	TOT3	TSLPRHVISEQKKYLSGSIIPESTFSPKRIT	25	UID108	1;2	103
TOT3	488	S	31.1877	NaN	NaN	NaN	32.7825	33.3502	NaN	33.2519	NaN	NaN	NaN	30.196	NaN	NaN	NaN	NaN	2	___1	0.802092	2.83248e-20	191.49	166.17	188.19	-0.74442	38208000000	488	TOT3	TOT3	ISEQKKYLSGSIIPESTFSPKRITSDADREF	26	UID15	1	103
TOT3	491	S	28.412	28.4855	27.5993	27.8769	29.9574	30.7863	30.5626	30.4948	27.6797	28.0831	27.9785	27.8796	30.6845	30.6591	30.7813	30.8592	3	___1	0.997702	5.33948e-39	237.16	208.45	93.269	0.85083	85523000000	491	TOT3	TOT3	QKKYLSGSIIPESTFSPKRITSDADREFQQR	27	UID16	1	103
TOT3	513	S	28.2454	NaN	26.1124	26.8044	24.7248	27.2861	26.9497	27.1041	27.2279	28.2422	28.3487	26.0483	27.1203	27.8641	27.4862	27.5298	3	___1	0.999406	8.83619e-09	153.95	137.82	91.457	-0.46494	5398400000	513	TOT3	TOT3	DADREFQQRRYQTERSYSGSLYRTKRDSVDE	30	UID18	1	103
TOT3	515	S	24.5244	22.4839	23.5577	24.1663	24.1733	25.2253	25.4128	25.3479	24.5916	25.8539	25.2829	24.1826	26.1353	25.9969	26.7004	27.3358	2	___1	0.999968	0.000626811	128.6	92.984	128.6	0.17009	775210000	515	TOT3	TOT3	DREFQQRRYQTERSYSGSLYRTKRDSVDETS	31	UID19	1	103
TOT3	545	S	26.6269	NaN	26.9127	26.7832	26.2532	27.3811	26.578	27.0235	26.7187	26.7505	26.6232	26.4834	27.538	27.4877	27.0791	27.0973	2	___2	0.940127	0.0149672	97.223	64.617	91.845	0.8702	1925800000	545	TOT3	TOT3	SEVPHVEHKGRFKVTSADLSPKGSTNSTFTP	12	UID103	2	103
TOT3	549	S	35.1022	27.6272	33.4902	34.4717	31.3591	35.0147	34.6452	35.0055	34.4269	34.6862	34.1024	33.3225	34.927	35.4176	35.1212	35.1089	3	___1	1	5.37854e-17	197.19	164.77	111.07	-0.60383	449270000000	549	TOT3	TOT3	HVEHKGRFKVTSADLSPKGSTNSTFTPFSGG	13	UID10	1;2	103
TOT3	549	S	26.6269	NaN	26.9127	26.7832	26.2532	27.3811	26.578	27.0235	26.7187	26.7505	26.6232	26.4834	27.538	27.4877	27.0791	27.0973	3	___2	1	5.37854e-17	197.19	164.77	111.07	-0.60383	449270000000	549	TOT3	TOT3	HVEHKGRFKVTSADLSPKGSTNSTFTPFSGG	13	UID104	1;2	103
TOT3	613	S	29.7501	30.5792	30.5054	30.6255	30.9516	31.3081	31.5928	31.2167	30.4685	30.9187	29.6656	28.7693	31.3616	31.29	31.4281	31.2608	2	___1	1	1.47396e-45	241.13	188.44	241.13	-0.24637	84559000000	613	TOT3	TOT3	RLIKYLEQTSAKQPGSPETNVDDLLQTPPAT	28	UID17	1	103
TOT3	624	T	25.2445	25.9329	24.7918	25.2847	26.5815	27.232	26.8246	26.5409	25.5328	25.6655	25.2207	24.2142	27.1047	27.1028	27.0241	27.0784	2	___1	0.999954	2.56646e-13	168.81	148.76	168.81	-0.058152	2511500000	624	TOT3	TOT3	KQPGSPETNVDDLLQTPPATSRERELQSQVM	76	UID41	1	103
TOT3	646	S	NaN	NaN	NaN	NaN	NaN	24.8705	25.0826	24.7715	NaN	23.4175	NaN	NaN	26.3025	26.036	26.3742	26.2175	3	___1	0.830457	3.77855e-28	209.89	185.06	209.89	-1.2017	422630000	646	TOT3	TOT3	ERELQSQVMLLQQSFSSLTEELKKQKQKNGQ	11	UID8	1	103

## Sheet: S2B
Extended Data Table 2B. TOT3 protein detected by mass spectrometry after TOT3 pulldown in the 4 indicated conditions (no ABA, ABA, OST1 and no ABA, and OST1 with ABA)
T: Protein IDs	TOT3_noABA_1	TOT3_noABA_2	TOT3_noABA_3	TOT3_noABA_4	TOT3_ABA_1	TOT3_ABA_2	TOT3_ABA_3	TOT3_ABA_4	TOT3-OST1_noABA_1	TOT3-OST1_noABA_2	TOT3-OST1_noABA_3	TOT3-OST1_noABA_4	TOT3-OST1_ABA_1	TOT3-OST1_ABA_2	TOT3-OST1_ABA_3	TOT3-OST1_ABA_4	N: Peptides	N: Razor + unique peptides	N: Unique peptides	N: Sequence coverage [%]	N: Unique + razor sequence coverage [%]	N: Unique sequence coverage [%]	N: Mol. weight [kDa]	N: Q-value	N: Score	N: Intensity	N: MS/MS count	T: Majority protein IDs	T: id
TOT3;tr|A0A1S4BL90|A0A1S4BL90_TOBAC;tr|A0A1S4ASV2|A0A1S4ASV2_TOBAC	39.7166	39.7178	39.5109	39.5803	38.4061	38.8296	38.7598	39.1276	38.8125	39.3743	39.4186	39.3798	39.0595	39.3237	39.2572	39.3351	91	91	79	89.9	89.9	80.3	75.363	0	323.31	8181800000000	12952	TOT3	103
