# Supplementary material for: A conserved signaling axis integrates conflicting environmental drought and heat signals to control stomatal aperture in plants
Source: Research Square preprint supplement (doi:10.21203/rs.3.rs-3228667/v1), 2023-08-18
Supplement: Supplementary file 5 [file d086f6e468ffdb5ee1639daa.xlsx]

## Sheet: S4A
Extended Data Table 4A. List of all identified phosphosites from phosphoprofiling of Arabidopsis seedlings (Col-0, ost1-3 and tot3 TOT3-5A) exposed to well watered conditions (W) or progressing drought stress (D) - Experiment 1
T: Leading proteins	Gene Model Description	Primary Gene Symbol	All Gene Symbols	C: Amino acid	N: Position	Col-0_W1	Col-0_W2	Col-0_W3	Col-0_W4	Col-0_D1	Col-0_D2	Col-0_D3	Col-0_D4	ost1_W1	ost1_W2	ost1_W3	ost1_D1	ost1_D2	ost1_D3	5A-1_W1	5A-1_W2	5A-1_W3	C: Charge	C: Multiplicity	C: Student's T-test Significant Col-0_W_Col-0_D	C: Student's T-test significant	C: Student's T-test Significant Col-0_D_ost1_D	C: Student's T-test significant_	C: Student's T-test Significant Col-0_W_5A-1_W	C: Student's T-test significant__	N: Localization prob	N: PEP	N: Score	N: Delta score	N: Score for localization	N: Mass error [ppm]	N: Intensity	N: Position	N: Student's T-test p-value Col-0_W_Col-0_D	N: Student's T-test Difference Col-0_W_Col-0_D	N: Student's T-test Test statistic Col-0_W_Col-0_D	N: Student's T-test p-value Col-0_D_ost1_D	N: Student's T-test Difference Col-0_D_ost1_D	N: Student's T-test Test statistic Col-0_D_ost1_D	N: Student's T-test p-value Col-0_W_5A-1_W	N: Student's T-test Difference Col-0_W_5A-1_W	N: Student's T-test Test statistic Col-0_W_5A-1_W	T: Proteins	T: Positions within proteins
AT1G01050	Encodes a soluble protein with inorganic pyrophosphatase activity that is highly specific for Mg-inorganic pyrophosphate.	PYROPHOSPHORYLASE 1 (PPa1)	PYROPHOSPHORYLASE 1 (PPa1);PYROPHOSPHORYLASE 1 (AtPPa1)	S	24	3.39247	2.86853	2.79303	2.75588	0.938482	1.6639	2.00333	3.28239	3.51197	3.72672	3.4644	2.41496	1.72995	2.42809	3.38706	2.99691	3.30985	2	___1							0.998984	0.00011006	149.82	20.138	140.35	-0.097889	3055100000	24	0.104	0.980451	1.91489	0.7347	-0.218972	-0.358371	0.226245	-0.278793	-1.3795	AT1G01050.1;AT1G01050.2	24;24
AT1G01100	Co-orthologous gene of large ribosomal subunit protein RPP1.	60S ACIDIC RIBOSOMAL PROTEIN P1-1 (RPP1A)	60S ACIDIC RIBOSOMAL PROTEIN P1-1 (RPP1A);RIBOSOMAL PROTEIN P1W (P1W);RPP1 CO-ORTHOLOGOUS GENE 1 (RPP1.1)	S	102	3.97465	2.95411	3.02971	3.34112	3.09847	4.03759	4.73208	5.49891	4.02067	4.17263	4.99478	2.69363	3.49211	3.61736	2.69166	2.88618	4.98773	2	___1							1	1.32443e-74	280.01	264.92	97.32	0.95969	345410000000	102	0.119845	-1.01687	-1.81259	0.159847	1.07406	1.65004	0.781724	-0.196962	-0.292403	AT1G01100.4;AT1G01100.2;AT1G01100.1;AT1G01100.3;AT5G47700.2;AT5G47700.1	102;102;102;86;103;103
AT1G01260	bHLH13 interacts with JAZ proteins, and functions redundantly with bHLH3, bHLH14 and bHLH17 to negatively regulate jasmonate responses.	JASMONATE ASSOCIATED MYC2 LIKE 2 (JAM2)	(BHLH13);JASMONATE ASSOCIATED MYC2 LIKE 2 (JAM2); (BHLH013)	S	395	1.18506	0.417379	0.00745583	0.573435	-0.396961	-0.576981	0.717188	1.31889	1.03223	0.871033	1.18623	0.64933	0.550604	1.24632	0.73987	0.838007	0.629585	3	___1							1	2.11532e-53	216.83	191.78	216.83	-0.4854	677520000	395	0.605615	0.280299	0.544673	0.375885	-0.549885	-0.971573	0.545732	-0.189989	-0.647714	AT1G01260.3;AT1G01260.2;AT1G01260.1	395;395;395
AT1G01320	Encodes REDUCED CHLOROPLAST COVERAGE 1 (REC1) a protein with similarity to the FLOURY locus in maize. Located in the nucleus and cytosol. Contributes to establishing the size of the chloroplast compartment.	REDUCED CHLOROPLAST COVERAGE (REC1)	REDUCED CHLOROPLAST COVERAGE (REC1);FLOURY ENDOSPERM LIKE 2 (FLL2)	S	1528	-2.44007	-3.05947	-3.54279	-2.72059	0.226858	0.0360584	-2.0364	-3.28077	-3.23485	-3.40249	-3.54228	-2.85991	-3.97457	-3.19331	-3.69486	-3.06298	-2.21204	2	___1							1	6.36403e-28	183.74	158.88	183.74	1.63	103550000	1528	0.104704	-1.67717	-1.91002	0.101506	2.07903	2.00334	0.91825	0.0492255	0.107927	AT1G01320.2;AT1G01320.3;AT1G01320.1	1528;1530;1538
AT1G01320	Encodes REDUCED CHLOROPLAST COVERAGE 1 (REC1) a protein with similarity to the FLOURY locus in maize. Located in the nucleus and cytosol. Contributes to establishing the size of the chloroplast compartment.	REDUCED CHLOROPLAST COVERAGE (REC1)	REDUCED CHLOROPLAST COVERAGE (REC1);FLOURY ENDOSPERM LIKE 2 (FLL2)	S	1120	0.399462	-0.490479	0.0820656	0.0147514	1.16249	-3.58051	-0.943237	-0.558861	-3.07625	0.25432	0.164566	-3.65767	0.619522	-2.23306	1.18544	-3.18423	0.826506	2	___1							0.999788	2.56156e-21	167.99	148.15	167.99	-2.9226	565310000	1120	0.363118	0.98148	0.983995	0.640785	0.777042	0.496213	0.755443	0.392211	0.329065	AT1G01320.2;AT1G01320.3;AT1G01320.1	1120;1120;1128
AT1G01320	Encodes REDUCED CHLOROPLAST COVERAGE 1 (REC1) a protein with similarity to the FLOURY locus in maize. Located in the nucleus and cytosol. Contributes to establishing the size of the chloroplast compartment.	REDUCED CHLOROPLAST COVERAGE (REC1)	REDUCED CHLOROPLAST COVERAGE (REC1);FLOURY ENDOSPERM LIKE 2 (FLL2)	S	1122	-2.61048	-2.9814	-2.65197	-2.35325	2.34192	2.20465	-0.787817	-3.41006	-3.21363	-3.7396	-3.96277	-2.63675	1.16428	-3.63302	-3.9236	-3.84418	-2.91324	2	___1							0.999997	5.97507e-101	312.5	289.63	312.5	-1.7316	659680000	1122	0.094129	-2.73645	-1.98683	0.418875	1.789	0.880535	NaN	0	NaN	AT1G01320.2;AT1G01320.3;AT1G01320.1	1122;1122;1130
AT1G01320	Encodes REDUCED CHLOROPLAST COVERAGE 1 (REC1) a protein with similarity to the FLOURY locus in maize. Located in the nucleus and cytosol. Contributes to establishing the size of the chloroplast compartment.	REDUCED CHLOROPLAST COVERAGE (REC1)	REDUCED CHLOROPLAST COVERAGE (REC1);FLOURY ENDOSPERM LIKE 2 (FLL2)	S	1542	-3.29126	-2.67726	-3.13211	-1.99141	1.19072	1.61514	-1.76597	-3.46985	-2.60719	-2.34396	-3.88209	-2.88944	-2.92831	-1.96207	-2.62128	-2.7106	-4.31904	2	___1							0.998718	2.45654e-16	183	145.82	183	-1.2809	224510000	1542	0.133705	-2.16552	-1.73351	0.2323	1.98578	1.35878	0.475643	0.443961	0.770817	AT1G01320.2;AT1G01320.3;AT1G01320.1	1542;1544;1552
AT1G01320	Encodes REDUCED CHLOROPLAST COVERAGE 1 (REC1) a protein with similarity to the FLOURY locus in maize. Located in the nucleus and cytosol. Contributes to establishing the size of the chloroplast compartment.	REDUCED CHLOROPLAST COVERAGE (REC1)	REDUCED CHLOROPLAST COVERAGE (REC1);FLOURY ENDOSPERM LIKE 2 (FLL2)	S	1301	-3.35578	-2.22901	-2.93472	-2.65872	-2.81111	-1.38178	-1.60107	-3.42847	-1.42743	-1.47771	-2.07605	-1.06865	-0.793161	-1.47839	-3.30648	-3.20803	-3.43012	3	___1							0.998542	0.000114402	79.237	52.202	79.237	2.3304	70054000	1301	0.402628	-0.488948	-0.900339	0.104423	-1.19221	-1.98116	0.127788	0.520322	1.82377	AT1G01320.2;AT1G01320.3;AT1G01320.1	1301;1303;1311
AT1G01320	Encodes REDUCED CHLOROPLAST COVERAGE 1 (REC1) a protein with similarity to the FLOURY locus in maize. Located in the nucleus and cytosol. Contributes to establishing the size of the chloroplast compartment.	REDUCED CHLOROPLAST COVERAGE (REC1)	REDUCED CHLOROPLAST COVERAGE (REC1);FLOURY ENDOSPERM LIKE 2 (FLL2)	S	1156	-2.70539	-3.03096	-2.63889	-3.12102	2.44279	2.00474	-3.05238	-3.53415	-2.97249	-3.40271	-3.57628	-1.72208	1.15993	-2.6947	-2.84725	-3.96359	-3.35993	2	___1							0.999957	2.07838e-23	182.7	158.87	170.61	-0.79418	633290000	1156	0.194658	-2.33931	-1.45972	0.805745	0.550865	0.259294	0.150619	0.516192	1.69617	AT1G01320.2;AT1G01320.3;AT1G01320.1	1156;1158;1166
AT1G01320	Encodes REDUCED CHLOROPLAST COVERAGE 1 (REC1) a protein with similarity to the FLOURY locus in maize. Located in the nucleus and cytosol. Contributes to establishing the size of the chloroplast compartment.	REDUCED CHLOROPLAST COVERAGE (REC1)	REDUCED CHLOROPLAST COVERAGE (REC1);FLOURY ENDOSPERM LIKE 2 (FLL2)	S	1414	-0.927637	-0.620531	-0.433903	-0.420038	-0.641611	-1.56048	-2.56722	-1.54416	-1.01106	-3.07386	-1.35325	-1.02744	-1.047	-0.768234	-0.573305	-0.549612	-0.360876	3	___1							0.999946	0.0216986	45.126	36.947	45.126	1.9811	240920000	1414	0.054721	0.977842	2.38063	0.238528	-0.630811	-1.33798	0.513667	-0.10593	-0.702587	AT1G01320.2;AT1G01320.3;AT1G01320.1	1414;1416;1424
AT1G01350	Zinc finger (CCCH-type/C3HC4-type RING finger) family protein;(source:Araport11)	0	0	S	266	2.15403	1.50369	1.54574	1.7558	2.27132	1.05448	2.39628	2.38704	1.96508	-0.731096	2.14136	1.74397	1.8553	2.2851	1.87653	2.27802	2.06976	3	___1							1	1.41223e-42	190.15	163.25	48.759	-0.062462	2004200000	266	0.452442	-0.287465	-0.803298	0.87848	0.0658255	0.160889	0.156308	-0.334951	-1.66741	AT1G01350.1	266
AT1G01440	hypothetical protein (DUF3133);(source:Araport11)	0	0	S	264	-1.02207	-1.44812	-1.22616	-1.04243	-2.72185	-3.75414	-0.738749	-4.04814	-1.29124	-0.674803	-2.82898	-3.02857	-2.69713	-1.01753	-1.44151	-3.13431	-1.30157	2	___1							0.817676	0.0357919	51.939	36.673	51.939	2.4267	120040000	264	0.0740402	1.63102	2.16036	0.604178	-0.567976	-0.552842	0.186833	0.774433	1.52891	AT1G01440.1	264
AT1G01470	Encodes late-embryogenesis abundant protein whose mRNA levels are induced in response to wounding and light stress. Might be involved in protection against desiccation.	LATE EMBRYOGENESIS ABUNDANT 14 (LEA14)	(LEA1);LIGHT STRESS-REGULATED 3 (LSR3);ARABIDOPSIS THALIANA LATE EMBRYOGENESIS ABUNDANT 14 (ATLEA14);LATE EMBRYOGENESIS ABUNDANT 14 (LEA14)	S	25	-3.04662	-2.18091	-2.76681	-3.08217	1.95865	1.77929	0.63291	-0.874437	-2.22574	-2.78703	-3.44506	0.678308	1.6856	-0.0553837	-2.6268	-2.57231	-3.64191	2	___1	+	Col-0_W_Col-0_D					0.990376	7.41213e-14	152.94	126.64	152.94	-0.14037	464200000	25	0.00179879	-3.64323	-5.31789	0.910026	0.104594	0.118844	NaN	0	NaN	AT1G01470.1	25
AT1G01510	Encodes a homolog of human CtBP. Mutant has longer and thicker leaves than wild type. Involved in controlling polar cell expansion in the leaf width direction. It has been shown to localize to cytosolic stress granules and is involved in their formation.	ANGUSTIFOLIA (AN)	DETORQUEO (DOQ);ANGUSTIFOLIA (AN)	S	398	1.91503	2.01915	1.8718	1.71821	2.17402	2.0407	1.44672	1.13951	1.46064	1.49411	1.30177	-0.344732	0.260262	1.12172	1.07054	1.53391	0.919512	3	___1			+	Col-0_D_ost1_D	+	Col-0_W_5A-1_W	0.999906	8.8317e-16	154.86	146.62	119.87	0.36531	1392000000	398	0.501078	0.180807	0.71568	0.0318333	1.35449	2.95141	0.00916357	0.706391	4.12116	AT1G01510.1	398
AT1G01790	Encodes a member of the cation/proton antiporters-2 antiporter superfamily, the K efflux antiporter KEA1 that is localized to the chloroplast envelope.	K+ EFFLUX ANTIPORTER 1 (KEA1)	K+ EFFLUX ANTIPORTER 1 (ATKEA1);K+ EFFLUX ANTIPORTER 1 (KEA1)	S	120	2.82769	1.89126	1.87139	2.01208	4.40317	3.61127	2.45255	2.37367	2.16606	2.58096	2.51075	1.25795	2.48276	1.52268	1.48627	1.60998	1.03524	2	___1							0.99912	9.42856e-79	307.92	265.61	258.14	-0.31679	2943200000	120	0.0967042	-1.05956	-1.96735	0.0772178	1.4557	2.21908	0.053017	0.77344	2.52243	AT1G01790.2;AT1G01790.1	120;120
AT1G01790	Encodes a member of the cation/proton antiporters-2 antiporter superfamily, the K efflux antiporter KEA1 that is localized to the chloroplast envelope.	K+ EFFLUX ANTIPORTER 1 (KEA1)	K+ EFFLUX ANTIPORTER 1 (ATKEA1);K+ EFFLUX ANTIPORTER 1 (KEA1)	S	365	2.00917	-2.5176	1.34731	-2.59837	2.89501	1.15143	1.42603	-4.08797	-3.7173	-1.81159	2.72648	0.15699	-2.89333	1.13871	-3.46673	1.65107	1.49619	4	___1							0.95208	7.24905e-29	138.84	128.94	113.46	-0.85687	2046600000	365	0.702423	-0.785997	-0.400839	0.689205	0.878669	0.423976	0.875626	-0.333384	-0.164708	AT1G01790.2;AT1G01790.1	365;365
AT1G01840	AP2-like ethylene-responsive transcription factor SNZ;(source:Araport11)	0	0	S	111	-0.444826	-0.190313	-0.392292	-2.79594	-1.75858	-2.76671	-0.219589	0.468119	-0.637986	-0.346245	-4.2753	-0.423056	-2.34043	0.267658	-0.342545	-0.719221	-0.335281	2	___1							0.935535	7.94881e-10	133.74	110.26	62.475	-0.45001	483320000	111	0.909594	0.113349	0.118428	0.835583	-0.237251	-0.218628	0.535085	-0.49016	-0.665688	AT1G01840.1	111
AT1G01960	Encodes one of the functionally redundant ARF guanine-nucleotide exchange factors (ARF-GEFs). Functions as regulators of post-Golgi trafficking.	EMBRYO SAC DEVELOPMENT ARREST 10 (EDA10)	EMBRYO SAC DEVELOPMENT ARREST 10 (EDA10);BIG3 (BIG3)	S	588	0.962217	0.576544	0.246763	0.151796	-0.0890598	-0.588823	-0.0685081	0.689085	1.04742	-0.464544	0.609627	0.727114	0.309666	0.806112	0.595858	0.992807	0.26145	2	___1							0.999666	8.44622e-128	335.39	308.55	308.02	-0.36604	8462200000	588	0.17142	0.498657	1.55297	0.121467	-0.628624	-1.86322	0.656294	-0.132375	-0.47277	AT1G01960.1	588
AT1G02080	Acts as scaffold protein in the CCR4-NOT complex, by interacting with various NOT proteins and CAF1. Essential protein for proper pollen development and germination capacity.	(NOT1)	(NOT1)	S	923	-0.207739	-1.03471	-0.314562	0.0296993	0.529264	0.12661	-0.196714	-0.24284	-0.23009	-0.453217	-0.107149	0.834229	1.33167	-0.563408	-0.225817	-0.138834	0.69294	2	___1							1	3.13733e-28	191.93	176.13	191.44	0.26722	541760000	923	0.184122	-0.435907	-1.50063	0.397789	-0.480082	-0.924209	0.236668	-0.491257	-1.34413	AT1G02080.2;AT1G02080.3;AT1G02080.1	923;923;977
AT1G02080	Acts as scaffold protein in the CCR4-NOT complex, by interacting with various NOT proteins and CAF1. Essential protein for proper pollen development and germination capacity.	(NOT1)	(NOT1)	S	1564	-2.34758	-3.42085	-3.1159	-3.54534	1.58038	1.10084	-3.01037	-2.74671	-2.95924	-4.19178	-3.67661	-3.19937	0.627831	-2.12291	-3.67846	-2.91776	-3.32468	2	___1							0.999659	1.99161e-21	179.1	162.16	162.77	-0.79873	257660000	1564	0.111085	-2.33845	-1.86736	0.665338	0.79585	0.459238	NaN	0	NaN	AT1G02080.2;AT1G02080.3;AT1G02080.1	1564;1565;1618
AT1G02120	Encodes VAD1 (Vascular Associated Death1), a regulator of cell death and defense responses in vascular tissues. VAD1 is a putative membrane associated protein and contains a GRAM domain. vad1 is a lesion mimic mutant that exhibits light conditional appearance of propagative HR (hypersensitive response)-like lesions along the vascular system. The mRNA is cell-to-cell mobile.	VASCULAR ASSOCIATED DEATH1 (VAD1)	VASCULAR ASSOCIATED DEATH1 (VAD1)	S	37	1.85862	0.910265	0.827045	0.612883	-0.0174904	0.410564	1.23355	2.14956	1.31111	1.22366	1.47996	-2.47196	0.10561	0.777828	1.02153	0.949055	1.18521	2	___1							0.800761	1.07381e-66	271.45	244.42	161.24	0.010304	1424700000	37	0.851206	0.108157	0.195831	0.201933	1.47355	1.46839	0.999383	0.000269413	0.000812068	AT1G02120.3;AT1G02120.2;AT1G02120.1	37;37;37
AT1G02260	Divalent ion symporter;(source:Araport11)	0	0	S	264	-1.78082	-3.2807	-3.06608	-2.96103	-1.46895	-2.26886	-2.09111	-1.51219	-3.79844	-1.52632	-2.02954	-3.0151	-2.38009	-1.75632	-2.94233	-3.99042	-2.34555	2	___1							0.990268	0.00930936	78.234	56.242	78.234	1.1695	60288000	264	0.0545746	-0.936882	-2.38259	0.215629	0.548557	1.41714	0.595846	0.320609	0.566007	AT1G02260.2;AT1G02260.1	264;264
AT1G02740	MRG1 and MRG2 proteins act as readers of H3K4me3/H3K36me3 marked chromatin. They interact with each other as well as several other protein classes, to modulate the activity of flowering genes.	MORF RELATED GENE 2 (MRG2)	MORF RELATED GENE 2 (MRG2)	S	3	-1.42233	-3.7098	-4.16637	-3.24004	-4.0649	-3.32124	-1.12265	-0.877459	-1.63946	-3.18564	-2.99455	-0.87323	-1.41757	-1.29739	-3.17586	-4.35009	-0.735956	2	___1							0.999996	1.05445e-06	108.18	88.083	108.18	-0.79018	77525000	3	0.458807	-0.788073	-0.791469	0.279623	-1.1505	-1.21209	0.75196	-0.380664	-0.333962	AT1G02740.1	3
AT1G02780	Ribosomal protein L19e family protein;(source:Araport11)	EMBRYO DEFECTIVE 2386 (emb2386)	EMBRYO DEFECTIVE 2386 (emb2386);RIBOSOMAL PROTEIN EL19X (EL19X)	S	156	-3.38722	-1.97978	-1.85447	-2.95104	0.933428	1.13721	-1.3612	-3.20201	-3.18013	-3.86203	-3.80372	-1.62784	-0.340635	-2.3277	-3.56657	-1.66793	-2.91756	2	___1							0.999999	0.000154056	135.8	112.42	115.57	0.092199	237500000	156	0.130067	-1.91999	-1.75346	0.564445	0.808914	0.616669	0.796955	0.174224	0.271368	AT1G02780.1;AT4G02230.1	156;156
AT1G02840	SR34/SR1 is a plant homologue of the human general/alternative splicing factor SF2/ASF. Barta et al (2010) have proposed a nomenclature for Serine/Arginine-Rich Protein Splicing Factors (SR proteins): Plant Cell. 2010, 22:2926.	SERINE/ARGININE-RICH PROTEIN SPLICING FACTOR 34 (SR34)	(SR1); (ATSRP34); (SRP34);SERINE/ARGININE-RICH PROTEIN SPLICING FACTOR 34 (SR34);SERINE/ARGININE-RICH PROTEIN SPLICING FACTOR 34 (At-SR34)	S	131	0.385822	-0.198395	0.414032	0.289213	-1.02858	-1.55694	-2.07978	-0.808971	-3.58951	-3.52212	-4.32122	-2.60679	-3.79243	-0.859438	0.241043	0.562235	0.843672	2	___1	+	Col-0_W_Col-0_D					0.98957	3.82099e-20	167.69	137.75	167.69	1.3068	346110000	131	0.00245052	1.59124	5.00075	0.239873	1.05098	1.33355	0.203504	-0.326315	-1.46234	AT1G02840.1;AT1G02840.5;AT1G02840.4;AT1G02840.3;AT1G02840.2	131;131;131;131;131
AT1G02990	hypothetical protein;(source:Araport11)	0	0	S	206	-2.15021	-0.0800037	-0.174393	0.708506	-2.27771	-2.07136	-0.27183	-3.77089	0.0921659	-0.388618	2.43378	-2.77473	-1.08784	0.969883	-4.18028	0.879866	0.821135	2	___1							0.999953	2.13191e-20	165.3	148.42	165.3	0.13868	414390000	206	0.125334	1.67392	1.78024	0.402851	-1.13372	-0.913561	0.80876	0.402401	0.255164	AT1G02990.1;AT1G02990.5;AT1G02990.2;AT1G02990.6;AT1G02990.4;AT1G02990.3	206;246;206;246;246;246
AT1G02990	hypothetical protein;(source:Araport11)	0	0	S	938	-1.02385	-2.19189	-2.62368	-2.19403	-4.05061	-2.551	-3.83993	-1.63723	-2.30089	-2.23522	-1.27567	-2.66171	-4.6294	-1.58934	-3.69781	-3.66667	-2.00128	3	___1							0.80278	0.0290791	41.423	24.917	41.423	2.8773	50406000	938	0.178276	1.01133	1.52428	0.954957	-0.0595418	-0.0593702	0.132678	1.11356	1.79459	AT1G02990.1;AT1G02990.5;AT1G02990.2;AT1G02990.6;AT1G02990.4;AT1G02990.3	938;978;938;978;978;978
AT1G03130	Encodes a protein predicted by sequence similarity with spinach PsaD to be photosystem I reaction center subunit II (PsaD2)	PHOTOSYSTEM I SUBUNIT D-2 (PSAD-2)	PHOTOSYSTEM I SUBUNIT D-2 (PSAD-2)	S	80	0.505554	-0.178312	-0.392569	0.671526	1.18456	1.80292	0.457882	0.0206184	0.1876	-0.210718	-0.00562096	-0.0231819	1.49362	-2.61303	-3.06546	-0.304508	-0.271641	2	___1							0.862253	2.29946e-52	207.07	177.22	207.07	0.53002	3486300000	80	0.17976	-0.714944	-1.51821	0.31059	1.24736	1.12782	0.161992	1.36542	1.6397	AT1G03130.1;AT4G02770.1	80;84
AT1G03310	Encodes a protein with strong similarity to isoamylase (EC:3.2.1.68) however lacks critical residues known to be important for activity. Appears to co localize with ISA1 in the chloroplast isoamylase complex. Mutations in this gene cause the loss of detectable isoamylase activity and the disruption of normal starch structure. It has been postulated that AtISA2 interacts with AtISA1 to form the Is…	DEBRANCHING ENZYME 1 (DBE1)	(ATBE2);BRANCHING ENZYME 2 (BE2);DEBRANCHING ENZYME 1 (DBE1);ARABIDOPSIS THALIANA ISOAMYLASE 2 (ATISA2); (ISA2)	S	348	-3.72033	-0.553265	-0.604517	-0.244165	-4.09473	-0.620594	0.185869	-2.60341	-2.01094	-2.70016	-3.13952	-3.34007	-2.70626	-3.03891	-3.55539	-3.90229	-3.08334	2	___1							0.96261	1.98342e-06	110.26	87.539	110.26	-0.15358	147580000	348	0.705254	0.502648	0.396786	0.33045	1.2452	1.07756	0.0731268	2.23311	2.26245	AT1G03310.2;AT1G03310.1	348;348
AT1G03370	C2 calcium/lipid-binding and GRAM domain containing protein;(source:Araport11)	0	0	S	161	1.89109	1.26446	1.03475	1.34575	1.34288	1.00561	-2.89737	-2.98786	1.59361	1.55569	1.89011	1.74484	1.49376	-3.6303	1.63734	1.38271	1.06039	3	___1							0.972277	9.51528e-34	167.74	154.17	161.62	-0.69421	1002800000	161	0.108642	2.26819	1.8834	0.726006	-0.753613	-0.37076	0.929367	0.0238654	0.0931963	AT1G03370.1;AT1G03370.2	161;161
AT1G03370	C2 calcium/lipid-binding and GRAM domain containing protein;(source:Araport11)	0	0	S	838	-3.04273	-3.65437	-3.0261	-2.73991	1.59408	1.80458	-3.44404	0.0127335	-0.348487	-2.80097	0.0546703	-3.04623	1.43374	-0.387835	-2.81521	-3.59668	-4.02319	2	___1	+	Col-0_W_Col-0_D					0.988353	7.66655e-05	91.401	64.86	64.123	3.0875	376300000	838	0.0446745	-3.10762	-2.53009	0.729594	0.658616	0.365639	NaN	0	NaN	AT1G03370.1	838
AT1G03740	Protein kinase superfamily protein;(source:Araport11)	0	0	S	102	0.691326	-2.88463	-2.40635	-2.53709	-2.53035	-4.25775	-1.05296	-0.126026	-3.35623	-3.13165	-2.76876	-0.5874	-1.09095	-0.652779	0.163361	-3.22721	-0.318712	2	___1							0.843303	2.59012e-14	159.26	132.72	159.26	1.1602	208730000	102	0.871262	0.207586	0.169117	0.310452	-1.21473	-1.12818	0.64091	-0.656665	-0.496023	AT1G03740.2;AT1G03740.1	102;102
AT1G03760	URI analog; prefoldinRPB5 interactor; interacts with prefoldin 2 (PFD2) and PFD6, two &#946;-type PFD members that modulate actin and tubulin patterning in roots.	(SARL)	(SARL);PREFOLDINRPB5 INTERACTOR (URI)	S	174	-0.590094	-2.59529	-2.46892	-2.62568	-1.08868	-0.878584	0.173254	0.59849	-0.573415	-2.88119	-0.0596066	-0.754677	-0.810522	-0.232052	-0.827011	-0.838957	-0.267685	2	___1	+	Col-0_W_Col-0_D					0.999984	2.91313e-32	187.06	166.11	166.09	-0.70329	424610000	174	0.0326176	-1.77112	-2.76546	0.578558	0.300204	0.593688	0.0653598	-1.42544	-2.35246	AT1G03760.1	174
AT1G03760	URI analog; prefoldinRPB5 interactor; interacts with prefoldin 2 (PFD2) and PFD6, two &#946;-type PFD members that modulate actin and tubulin patterning in roots.	(SARL)	(SARL);PREFOLDINRPB5 INTERACTOR (URI)	S	211	-3.04548	-0.202566	-0.880369	0.421127	-0.352226	-0.679281	1.06476	1.0948	-3.97126	-3.26027	-3.6896	0.954664	-4.60935	0.465981	-0.00260353	-3.31373	0.547117	4	___1							0.779067	5.40717e-13	94.992	80.399	46.76	1.1391	377780000	211	0.221666	-1.20883	-1.3635	0.435391	1.34492	0.847511	0.997887	-0.00375028	-0.00278379	AT1G03760.1	211
AT1G03910	Encodes the Arabidopsis homolog of a conserved eukaryotic protein without known functional domains. The protein that localizes to nuclear speckles and colocalizes with known splicing proteins.	CACTIN (CTN)	CACTIN (CTN)	S	406	3.13633	2.9185	2.77209	3.06468	2.9263	2.18799	3.49071	3.39085	3.36027	3.22791	3.59905	3.465	3.2175	3.7454	2.74024	2.88831	3.60366	2	___1							1	4.29847e-101	316.52	295.43	277.22	-0.135	6515900000	406	0.935275	-0.0260615	-0.0846747	0.25802	-0.477007	-1.27598	0.684679	-0.104501	-0.430615	AT1G03910.1;AT1G03910.2	406;450
AT1G03930	Phosphorylates serine, threonine, and tyrosine	DUAL SPECIFICITY KINASE 1 (ADK1)	DUAL SPECIFICITY KINASE 1 (ADK1);CASEIN KINASE I-LIKE 9 ALPHA (CKL9ALPHA);CASEIN KINASE I-LIKE 9 BETA (CKL9BETA)	S	323	-1.82241	-1.52506	-1.70811	-1.62767	-4.46281	-3.98737	-3.1674	-1.60713	-1.50069	-1.81589	-1.74749	-2.883	-2.20033	-3.09387	-1.77555	-3.60902	-1.82854	2	___1	+	Col-0_W_Col-0_D					0.997768	8.08802e-11	144.97	127.57	144.97	-0.84525	86036000	323	0.0407792	1.63536	2.59786	0.487435	-0.580442	-0.749256	0.209531	0.733554	1.43956	AT1G03930.1	323
AT1G04080	Encodes a U1 small nuclear ribonucleoprotein (snRNP) factor involved in alternative splicing.	(PRP39A)	(PRP39A); (PRP39)	S	97	-1.66709	-3.0049	-2.29383	-2.81284	-3.956	-1.39344	-3.0605	-0.969057	-1.63676	-2.8826	-1.18545	-0.762079	-0.66774	-1.16601	-2.5955	-3.14058	-3.67945	2	___1							1	1.42175e-09	130.85	113.91	130.85	0.17508	78041000	97	0.90007	-0.0999164	-0.130983	0.138444	-1.47947	-1.76156	0.176159	0.693846	1.57463	AT1G04080.4;AT1G04080.1;AT1G04080.3	97;97;97
AT1G04080	Encodes a U1 small nuclear ribonucleoprotein (snRNP) factor involved in alternative splicing.	(PRP39A)	(PRP39A); (PRP39)	S	304	5.00933	4.20905	4.16645	4.49206	3.6412	2.48922	4.05541	4.71385	5.01911	5.13797	4.52255	5.52538	5.49177	5.40833	4.91204	4.90322	3.98697	3	___1			+	Col-0_D_ost1_D			0.999694	1.12254e-46	202.2	178.63	182.56	-0.10877	19249000000	304	0.191733	0.744302	1.47087	0.0250774	-1.75024	-3.16063	0.718249	-0.131519	-0.38187	AT1G04080.4;AT1G04080.1;AT1G04080.3;AT1G04080.5;AT1G04080.2	304;304;304;85;118
AT1G04140	Transducin family protein / WD-40 repeat family protein;(source:Araport11)	0	0	S	11	-2.72742	-0.877884	-0.292297	-3.38699	-3.09414	-2.4938	-0.404774	-3.381	0.191266	-2.67279	-4.52225	-0.22621	-4.34256	-3.15882	-0.0693264	-0.329226	-0.0234089	2	___1							0.765796	9.13561e-10	143.98	109.16	132.86	0.4266	179320000	11	0.619065	0.522278	0.523996	0.864736	0.232433	0.179307	0.112682	-1.6805	-1.9217	AT1G04140.1;AT1G04140.2	11;11
AT1G04270	Encodes cytosolic ribosomal protein S15.	CYTOSOLIC RIBOSOMAL PROTEIN S15 (RPS15)	CYTOSOLIC RIBOSOMAL PROTEIN S15 (RPS15);RIBOSOMAL PROTEIN US19U (US19U)	S	36	-0.712425	-2.99934	-1.02181	-0.910116	-0.523424	-1.02116	-0.542397	-0.423122	-0.704904	-3.45183	-0.593864	-1.16405	-0.800707	0.0297604	-0.463264	-0.465656	-0.440271	2	___1							0.863586	8.85649e-07	122.31	101.06	122.31	-0.97231	250490000	36	0.204104	-0.783396	-1.42475	0.960462	0.0174723	0.0521061	0.190803	-0.954524	-1.51255	AT1G04270.2;AT1G04270.1;AT5G09500.1;AT5G09510.1	36;36;34;36
AT1G04410	predicted to encode a cytosolic malate dehydrogenase.	CYTOSOLIC-NAD-DEPENDENT MALATE DEHYDROGENASE 1 (c-NAD-MDH1)	CYTOSOLIC-NAD-DEPENDENT MALATE DEHYDROGENASE 1 (c-NAD-MDH1)	S	246	-0.341539	-3.28018	-3.04275	-3.04182	-2.52627	-2.79644	-0.819113	-0.33919	-0.545236	-0.355942	-0.844364	-0.830578	-0.808815	-0.724882	-1.50259	-1.84851	-0.304512	2	___1							0.999226	0.000226418	87.429	66.476	85.493	-3.5345	146420000	246	0.418037	-0.80632	-0.869416	0.302411	-0.832162	-1.14933	0.243128	-1.20804	-1.32294	AT1G04410.1;AT5G43330.1	246;246
AT1G04530	Encodes one of the 36 carboxylate clamp (CC)-tetratricopeptide repeat (TPR) proteins (Prasad 2010, Pubmed ID: 20856808) with potential to interact with Hsp90/Hsp70 as co-chaperones.	TETRATRICOPEPTIDE REPEAT 4 (TPR4)	TETRATRICOPEPTIDE REPEAT 4 (TPR4)	S	88	3.69198	3.47522	3.81807	4.47318	0.43597	0.608925	3.33156	3.37806	3.11384	-2.92968	3.88812	0.241627	-2.69865	2.08167	3.42388	3.123	4.23032	3	___1							1	7.1608e-72	247.11	221.39	220.78	-0.71154	4985600000	88	0.0631375	1.92598	2.27609	0.23121	2.06374	1.36247	0.501165	0.272211	0.724614	AT1G04530.1	88
AT1G04530	Encodes one of the 36 carboxylate clamp (CC)-tetratricopeptide repeat (TPR) proteins (Prasad 2010, Pubmed ID: 20856808) with potential to interact with Hsp90/Hsp70 as co-chaperones.	TETRATRICOPEPTIDE REPEAT 4 (TPR4)	TETRATRICOPEPTIDE REPEAT 4 (TPR4)	S	7	0.653969	-2.06062	-0.87513	-0.894562	1.73454	1.20335	-0.373629	-0.766777	1.39591	-0.0722656	0.0174694	-0.434393	2.58699	-2.34011	-0.671856	-0.722759	-0.146236	2	___1							0.999996	6.90899e-28	182.35	169.97	176.23	-1.5977	705160000	7	0.180787	-1.24346	-1.51404	0.729007	0.511875	0.366476	0.695583	-0.280468	-0.414658	AT1G04530.1	7
AT1G04530	Encodes one of the 36 carboxylate clamp (CC)-tetratricopeptide repeat (TPR) proteins (Prasad 2010, Pubmed ID: 20856808) with potential to interact with Hsp90/Hsp70 as co-chaperones.	TETRATRICOPEPTIDE REPEAT 4 (TPR4)	TETRATRICOPEPTIDE REPEAT 4 (TPR4)	S	47	-3.17564	-2.57926	-3.17142	-2.80191	0.735704	0.73719	-3.71192	-2.10733	-3.02541	-2.51482	-3.28255	-3.22304	-0.611065	-3.27834	-3.25637	-1.75753	-2.80172	2	___1							1	1.9244e-20	166.91	145.51	166.91	-1.3094	153470000	47	0.148074	-1.84547	-1.65955	0.430373	1.28423	0.85744	NaN	0	NaN	AT1G04530.1	47
AT1G04750	Encodes vesicle-associated membrane protein 7B (VAMP7B, or VAMP721). Required for cell plate formation.VAMP721 interacts with KAT1 and KC1 K+ channels, affects channel gating and suppresses the K+ current within the physiological voltage range. Post-transcriptionally regulated by CRT1/2 under ER stress.	VESICLE-ASSOCIATED MEMBRANE PROTEIN 721 (VAMP721)	VESICLE-ASSOCIATED MEMBRANE PROTEIN 7B (VAMP7B);VESICLE-ASSOCIATED MEMBRANE PROTEIN 721 (VAMP721); (ATVAMP721); (AT VAMP7B)	S	171	-3.19932	-3.29076	-2.5057	-3.87882	1.5489	1.39538	-1.13587	-2.8029	-3.4191	-3.1288	-3.69899	-3.38398	-3.96546	-2.67399	-3.19776	-1.41074	-3.1051	2	___1	+	Col-0_W_Col-0_D					0.999957	5.4789e-05	106.32	73.377	98.942	0.23868	263440000	171	0.034152	-2.97003	-2.73075	0.0606606	3.09252	2.41271	0.321782	-0.64745	-1.09917	AT1G04750.1;AT2G33120.1;AT2G33120.2;AT2G33120.3;AT1G04750.4;AT1G04750.3;AT1G04750.2;AT1G04760.2;AT1G04760.1;AT2G32670.1	171;171;179;89;93;93;93;171;171;236
AT1G04780	Ankyrin repeat family protein;(source:Araport11)	0	0	S	607	0.0915623	-2.97852	-0.287783	-0.411093	-1.80157	-2.7383	0.0505733	0.103456	-2.95821	-3.71617	-3.12503	-0.595364	-1.65533	-0.726336	-0.78393	-0.569288	-0.985483	3	___1							0.994311	4.00666e-05	93.767	77.461	93.767	-0.51243	411780000	607	0.84724	0.200002	0.201132	0.910279	-0.104117	-0.118507	0.894375	-0.116891	-0.139666	AT1G04780.1	607
AT1G04780	Ankyrin repeat family protein;(source:Araport11)	0	0	S	435	0.0423069	-0.697763	-0.778091	-0.567768	-0.684713	-1.42213	-0.78253	-0.858622	-4.12277	-0.255613	-0.379282	0.721666	-0.221931	-0.00219917	-0.604784	-0.120049	-1.697	2	___1			+	Col-0_D_ost1_D			0.989413	4.5178e-17	196.8	184.95	125.89	1.0238	1053100000	435	0.130051	0.436671	1.75354	0.0159907	-1.10285	-3.57313	0.523679	0.306949	0.685211	AT1G04780.1	435
AT1G04830	Ypt/Rab-GAP domain of gyp1p superfamily protein;(source:Araport11)	0	0	S	52	-3.65643	-2.379	-2.77297	-3.3826	-0.89978	-0.221844	-2.38991	-3.26361	-3.22858	-2.64967	-3.29272	-2.03006	-2.7207	-3.45394	-3.32454	-2.19555	-3.30512	3	___1							0.999997	1.49984e-05	90.946	77.283	81.534	0.70294	270490000	52	0.121093	-1.35396	-1.80511	0.293874	1.04111	1.17233	NaN	0	NaN	AT1G04830.3;AT1G04830.1;AT1G04830.2	52;52;52
AT1G04830	Ypt/Rab-GAP domain of gyp1p superfamily protein;(source:Araport11)	0	0	S	79	-3.20333	-3.23603	-3.1194	-4.05265	-0.345774	-0.0739594	-2.02574	-3.56151	-3.58296	-3.27955	-2.99905	-2.6869	0.0217342	-2.5835	-3.38524	-2.81007	-2.93975	3	___1							0.988762	4.29739e-16	138.16	126.53	138.16	4.2673	99790000	79	0.0642049	-1.90111	-2.26388	0.846129	0.247811	0.204362	NaN	0	NaN	AT1G04830.3;AT1G04830.1;AT1G04830.2	79;79;79
AT1G04920	Encodes a sucrose-phosphate synthase whose activity is stimulated by Glc-6-P and inhibited by Pi.	SUCROSE PHOSPHATE SYNTHASE 3F (SPS3F)	SUCROSE PHOSPHATE SYNTHASE 3F (ATSPS3F);SUCROSE PHOSPHATE SYNTHASE 3F (SPS3F);SUCROSE PHOSPHATE SYNTHASE B (SPSB); (ATSPSB)	S	156	-3.25969	-0.82711	-0.684757	-3.17579	-3.65023	-2.48509	-3.94446	-3.39863	-0.597995	-0.701101	-0.181538	-1.07108	-1.02356	-0.37034	-1.50427	-0.844212	-0.458883	2	___1			+	Col-0_D_ost1_D			0.999998	0.00102132	79.639	62.801	79.639	2.6307	159520000	156	0.125908	1.38277	1.77695	0.00172362	-2.54795	-6.09263	0.285749	-1.05105	-1.19479	AT1G04920.1	156
AT1G05150	Calcium-binding tetratricopeptide family protein;(source:Araport11)	0	0	S	187	0.58424	-0.103783	-0.185036	0.190582	-2.24548	-3.10854	0.241192	0.884884	0.571687	0.299078	1.04621	0.793028	0.892069	0.199848	-0.189701	0.0556183	0.23016	3	___1							0.997272	2.30566e-52	204.98	186.96	174.16	-0.23195	458540000	187	0.27288	1.17849	1.20693	0.203058	-1.6853	-1.46405	0.713026	0.0894753	0.389382	AT1G05150.1	187
AT1G05150	Calcium-binding tetratricopeptide family protein;(source:Araport11)	0	0	S	567	2.20848	1.12525	0.801214	1.34707	0.648338	1.04713	-2.21959	2.24053	2.37563	2.99291	2.24611	1.10293	1.19959	1.81805	1.46088	1.51723	1.72302	2	___1							0.984086	1.97658e-09	131.72	121.66	128.82	-0.36841	1369700000	567	0.37936	0.941402	0.94879	0.443001	-0.944421	-0.832616	0.610782	-0.196538	-0.542481	AT1G05150.1	567
AT1G05150	Calcium-binding tetratricopeptide family protein;(source:Araport11)	0	0	S	135	1.38164	-2.65311	-2.2449	-3.94674	-2.78536	-0.898676	-0.0185051	1.36568	0.691493	0.232643	0.837481	-0.51753	-0.833952	0.410305	-0.730282	-0.310663	0.103783	2	___1							1	3.64195e-57	240.71	214.84	240.71	-1.4864	603300000	135	0.406166	-1.28156	-0.893162	0.811323	-0.270491	-0.251656	0.30692	-1.55339	-1.13741	AT1G05150.1;AT2G32450.1	135;132
AT1G05460	Encodes a protein with similarity to RNA helicases. Mutants are defective in post-transcriptional gene silencing.	SILENCING DEFECTIVE (SDE3)	SILENCING DEFECTIVE (SDE3)	S	8	0.0256729	-0.995682	-0.68582	-1.01007	-1.16488	-0.859751	-0.0015583	0.85663	-0.0834055	0.0103798	0.816401	-1.30561	-0.951653	-0.23826	-0.500666	-1.10319	0.910902	2	___1							0.999971	1.00404e-20	171.79	148.41	170.5	-0.7811	350790000	8	0.495678	-0.374086	-0.725112	0.409347	0.539452	0.90005	0.483652	-0.43549	-0.75613	AT1G05460.2;AT1G05460.1	8;8
AT1G05805	basic helix-loop-helix (bHLH) DNA-binding superfamily protein;(source:Araport11)	ABA-RESPONSIVE KINASE SUBSTRATE 2 (AKS2)	ABA-RESPONSIVE KINASE SUBSTRATE 2 (AKS2)	S	144	1.41694	1.21128	0.663639	1.68096	-0.511076	-1.23825	-0.148727	0.573307	2.27568	1.20716	1.18858	-0.519661	-0.742054	0.671276	1.12669	1.44188	1.85358	2	___1	+	Col-0_W_Col-0_D					0.999944	4.99146e-35	216.05	195.94	216.05	0.042208	1082200000	144	0.0110489	1.57439	3.62364	0.825322	-0.134375	-0.232561	0.490171	-0.23084	-0.744306	AT1G05805.1	144
AT1G05805	basic helix-loop-helix (bHLH) DNA-binding superfamily protein;(source:Araport11)	ABA-RESPONSIVE KINASE SUBSTRATE 2 (AKS2)	ABA-RESPONSIVE KINASE SUBSTRATE 2 (AKS2)	S	189	2.80552	2.72979	2.57268	2.63379	-0.396746	-3.87363	0.417063	2.37049	2.88219	2.53996	2.69517	0.331909	-0.24251	1.19682	2.74563	2.56409	2.72429	2	___1							0.999982	2.54698e-16	182.37	149.93	153.23	-0.65911	1939400000	189	0.0577016	3.05615	2.3418	0.634832	-0.799446	-0.505294	0.92724	0.0074393	0.0960123	AT1G05805.1	189
AT1G05805	basic helix-loop-helix (bHLH) DNA-binding superfamily protein;(source:Araport11)	ABA-RESPONSIVE KINASE SUBSTRATE 2 (AKS2)	ABA-RESPONSIVE KINASE SUBSTRATE 2 (AKS2)	S	28	2.77293	2.6792	2.15628	2.74283	0.45857	0.619659	1.49804	1.83187	3.19399	1.22929	2.9002	1.19748	0.585598	1.6554	2.63996	2.89099	3.52728	2	___1	+	Col-0_W_Col-0_D					0.999999	1.97725e-71	237.6	219.77	204.04	-0.69392	2638600000	28	0.00648077	1.48578	4.08291	0.929201	-0.0441246	-0.0934152	0.183652	-0.431597	-1.54226	AT1G05805.1	28
AT1G05960	Part of a nanodomain complex that tethers PI4K&#945;1 to the plasma membrane.	EFR3 OF PLANT 3 (EFOP3)	EFR3 OF PLANT 3 (EFOP3)	S	734	1.22866	0.172039	-3.39117	0.73892	-3.45209	-3.70206	0.42569	1.1282	1.2339	0.301218	1.18769	0.545097	0.00295448	-2.94983	0.594879	-3.32707	0.846342	3	___1							0.970825	1.10022e-48	187.06	165.88	187.06	-1.1604	642520000	734	0.532954	1.08718	0.661338	0.746147	-0.59947	-0.342155	0.858189	0.31573	0.188107	AT1G05960.4;AT1G05960.3;AT1G05960.1;AT1G05960.2	734;734;734;755
AT1G06210	Encodes a member of the Arabidopsis TOL (TOM1-LIKE) family of ubiquitin binding proteins that acts redundantly in the recognition and further endocytic sorting of a PIN-FORMED (PIN)-type auxin carrier protein at the plasma membrane, modulating dynamic auxin distribution and associated growth responses.	TOM1-LIKE 2 (TOL2)	TOM1-LIKE 2 (TOL2)	S	377	-0.795856	-3.26313	-2.0265	-1.90148	-3.10641	-3.33383	-2.41206	0.375694	-0.814515	-0.707897	-0.585438	-0.524759	-0.082777	-2.19411	-4.39255	-3.08229	-3.74399	2	___1					+	Col-0_W_5A-1_W	1	2.28502e-12	153.81	131.07	49.149	0.46732	1510700000	377	0.90585	0.122411	0.12336	0.34809	-1.18527	-1.03504	0.0494867	1.74287	2.57909	AT1G06210.1	377
AT1G06210	Encodes a member of the Arabidopsis TOL (TOM1-LIKE) family of ubiquitin binding proteins that acts redundantly in the recognition and further endocytic sorting of a PIN-FORMED (PIN)-type auxin carrier protein at the plasma membrane, modulating dynamic auxin distribution and associated growth responses.	TOM1-LIKE 2 (TOL2)	TOM1-LIKE 2 (TOL2)	S	378	-2.61643	-4.07382	-3.18881	-1.61886	1.5369	2.11837	0.0613651	0.056921	-0.949771	-3.54163	-3.88061	-0.30941	0.612682	-0.324589	-1.31159	-0.839613	-0.876097	2	___1	+	Col-0_W_Col-0_D			+	Col-0_W_5A-1_W	1	9.0767e-19	201.48	192.4	49.149	0.46732	1857200000	378	0.00202136	-3.81787	-5.19667	0.216491	0.950493	1.41402	0.0301674	-1.86538	-2.99803	AT1G06210.1	378
AT1G06230	This gene is predicted to encode a bromodomain-containing protein. Plant lines expressing RNAi constructs targeted against GTE4 show some resistance to agrobacterium-mediated root transformation.Repress JA biosynthesis by repressing OPR3 expression (PMID:36372880).	GLOBAL TRANSCRIPTION FACTOR GROUP E4 (GTE4)	GLOBAL TRANSCRIPTION FACTOR GROUP E4 (GTE4)	S	101	-3.44047	-2.63796	-3.77063	-2.31815	-1.54863	-0.890821	-2.5399	-2.16204	-2.2964	-2.88726	-2.73916	-3.21583	-3.55931	-2.40004	-3.20063	-2.84557	-3.13748	2	___1	+	Col-0_W_Col-0_D					0.999605	0.00193743	96.143	78.005	96.143	-0.76429	42279000	101	0.0442869	-1.25645	-2.53654	0.0565182	1.27304	2.47017	NaN	0	NaN	AT1G06230.4;AT1G06230.3;AT1G06230.2;AT1G06230.1	101;101;101;101
AT1G06230	This gene is predicted to encode a bromodomain-containing protein. Plant lines expressing RNAi constructs targeted against GTE4 show some resistance to agrobacterium-mediated root transformation.Repress JA biosynthesis by repressing OPR3 expression (PMID:36372880).	GLOBAL TRANSCRIPTION FACTOR GROUP E4 (GTE4)	GLOBAL TRANSCRIPTION FACTOR GROUP E4 (GTE4)	S	192	0.078371	-2.79406	-3.47917	-3.25242	-3.41735	-3.90986	-3.86198	0.666407	0.238923	-0.0668621	0.749657	-3.20673	-4.14267	-2.5155	-1.97481	-0.869913	0.326633	3	___1							0.994104	2.02597e-12	133.21	116.46	91.079	2.4596	249390000	192	0.851862	0.268875	0.194956	0.650374	0.657608	0.481684	0.233639	-1.52245	-1.35426	AT1G06230.4;AT1G06230.3;AT1G06230.2;AT1G06230.1	192;192;192;192
AT1G06410	Encodes an enzyme putatively involved in trehalose biosynthesis. Though the protein has both trehalose-6-phosphate synthase (TPS)-like and trehalose-6-phosphate phosphatase (TPP)-like domains, neither activity has been detected in enzymatic assays nor has the protein been able to complement yeast TPS or TPP mutants.	TREHALOSE-PHOSPHATASE/SYNTHASE 7 (TPS7)	TREHALOSE-PHOSPHATASE/SYNTHASE 7 (ATTPS7);TREHALOSE-PHOSPHATASE/SYNTHASE 7 (TPS7); (ATTPSA);TREHALOSE -6-PHOSPHATASE SYNTHASE S7 (TPS7)	S	5	4.1516	3.46652	3.37199	3.45126	2.09469	1.40381	3.32234	3.3848	3.62564	1.62947	3.69713	2.89099	2.76617	3.1542	3.40898	3.90731	4.07576	2	___1							0.998364	1.41896e-132	352.77	320.25	312.38	-0.93598	6029400000	5	0.0865585	1.05893	2.04735	0.536124	-0.385708	-0.663923	0.522977	-0.187006	-0.686421	AT1G06410.3;AT1G06410.2;AT1G06410.1	5;5;5
AT1G06430	encodes a FtsH protease that is localized to the chloroplast	FTSH PROTEASE 8 (ftsh8)	FTSH PROTEASE 8 (ftsh8); (FTSH8)	S	393	-1.69042	-2.62573	-2.15111	-2.12432	-3.47598	-2.56793	-2.33416	-1.70033	-3.32272	-2.93306	-1.54087	-3.12666	-4.52941	-3.38777	-2.1423	-2.23085	-2.3242	2	___1							1	0.012744	60.49	44.828	44.318	-0.25587	67639000	393	0.404285	0.371708	0.896973	0.0948804	1.16168	2.05629	0.728554	0.0845583	0.367121	AT1G06430.3;AT1G06430.2;AT1G06430.1;AT2G30950.3;AT2G30950.2;AT2G30950.1;AT2G30950.4	386;386;386;393;393;393;397
AT1G06670	nuclear DEIH-box helicase (NIH) encoding a putative RNA and/or DNA helicase homologous to a group of nucleic acid helicases from the DEAD/H family with nuclear DEIH-box helicase (NIH) distinct N- and C-terminal regions that differ from animal DEIH proteins The mRNA is cell-to-cell mobile.	NUCLEAR DEIH-BOXHELICASE (NIH)	NUCLEAR DEIH-BOXHELICASE (NIH)	S	1020	0.195662	-0.0777721	-0.836342	-0.394491	-1.57487	-1.73413	-0.458639	0.618835	0.571754	0.323507	0.796053	0.364473	-0.351103	0.721035	0.562983	0.470062	0.813927	3	___1					+	Col-0_W_5A-1_W	0.999992	3.17748e-24	172.66	143.85	153.84	0.34352	435730000	1020	0.422229	0.508963	0.861152	0.200329	-1.032	-1.4746	0.0229882	-0.893893	-3.23847	AT1G06670.2;AT1G06670.1	1020;1020
AT1G06680	Encodes a 23 kD extrinsic protein that is part of photosystem II and participates in the regulation of oxygen evolution. Phosphorylation of this protein is dependent on calcium. In plsp1-1 mutant plastids, the nonmature form of the protein localizes in the stroma. The mRNA is cell-to-cell mobile.	PHOTOSYSTEM II SUBUNIT P-1 (PSBP-1)	PHOTOSYSTEM II SUBUNIT P-1 (PSBP-1);OXYGEN-EVOLVING ENHANCER PROTEIN 2 (OEE2);PHOTOSYSTEM II SUBUNIT P (PSII-P);OXYGEN EVOLVING COMPLEX SUBUNIT 23 KDA (OE23)	S	147	1.37313	1.7204	-3.01482	2.4341	1.56456	2.04418	2.63551	-3.25874	1.92437	-0.11237	2.45278	1.16732	0.703985	1.42682	1.47375	1.27925	2.20637	2	___1							0.993738	3.37225e-99	295.98	266.38	258.17	0.069891	1930800000	147	0.950645	-0.118174	-0.0645299	0.835172	-0.352998	-0.219186	0.519284	-1.02492	-0.69281	AT1G06680.1;AT1G06680.2	147;103
AT1G06680	Encodes a 23 kD extrinsic protein that is part of photosystem II and participates in the regulation of oxygen evolution. Phosphorylation of this protein is dependent on calcium. In plsp1-1 mutant plastids, the nonmature form of the protein localizes in the stroma. The mRNA is cell-to-cell mobile.	PHOTOSYSTEM II SUBUNIT P-1 (PSBP-1)	PHOTOSYSTEM II SUBUNIT P-1 (PSBP-1);OXYGEN-EVOLVING ENHANCER PROTEIN 2 (OEE2);PHOTOSYSTEM II SUBUNIT P (PSII-P);OXYGEN EVOLVING COMPLEX SUBUNIT 23 KDA (OE23)	S	159	0.376003	0.313196	0.234211	0.374622	-0.207067	-0.0642815	0.185532	-1.14243	0.31951	-1.9779	-3.31965	-0.257456	-0.192543	-0.16605	-0.483372	0.220356	0.456585	2	___1							1	1.60846e-65	250.55	232.54	250.55	0.30257	1341300000	159	0.0737479	0.631569	2.16323	0.779318	-0.101711	-0.295739	0.327215	0.259985	1.08557	AT1G06680.1;AT1G06680.2	159;115
AT1G06840	Homomultimers interact with cytoplasmic signaling molecule PBL27, resulting in herbivory resistance, in an ethylene-dependent manner.	HDS-ASSOCIATED RLK1 (HAK1)	HDS-ASSOCIATED RLK1 (HAK1)	S	783	-2.55045	-0.747875	-0.595825	-0.643894	-3.02955	-2.58539	-2.45617	-3.59532	-2.77381	-3.04008	-3.13477	-1.53743	-3.89435	-0.801516	-0.698277	-0.250191	-0.614927	2	___1	+	Col-0_W_Col-0_D					0.999782	8.24766e-06	103.02	97.812	79.311	1.0061	270530000	783	0.0162229	1.7821	3.3091	0.36265	-0.838848	-1.00129	0.332136	-0.61338	-1.07341	AT1G06840.1	783
AT1G06890	UXT3 is a member of the NST-KT subfamily of nucleotide/sugar transporters. It is localized to the golgi and functions as a UDP-Xyl transporter.	UDP-XYLOSE TRANSPORTER3 (UXT3)	UDP-XYLOSE TRANSPORTER3 (UXT3)	S	334	0.268826	-3.59296	-3.79402	-1.17363	-3.01255	-3.91466	-3.23373	1.77793	0.413495	-4.07152	-4.44604	-0.171713	0.0328274	0.310896	-2.69022	-3.23858	-3.45268	3	___1							0.999997	1.60442e-32	182.4	168.08	182.4	-2.3486	194770000	334	0.989313	0.0228055	0.0139623	0.223244	-2.15309	-1.38997	0.411472	1.05421	0.895668	AT1G06890.4;AT1G06890.3;AT1G06890.2;AT1G06890.1	334;334;334;334
AT1G06950	Encodes a protein thought to be a part of the translocon at the chloroplast inner envelope. Involved in protein import into the chloroplast and chloroplast biogenesis. C-terminal half of Tic110 functions as scaffolds for protein-protein interactions.	TRANSLOCON AT THE INNER ENVELOPE MEMBRANE OF CHLOROPLASTS 110 (TIC110)	ARABIDOPSIS THALIANA TRANSLOCON AT THE INNER ENVELOPE MEMBRANE OF CHLOROPLASTS 110 (ATTIC110);TRANSLOCON AT THE INNER ENVELOPE MEMBRANE OF CHLOROPLASTS 110 (TIC110)	S	483	-0.102859	-0.642105	-0.699209	-1.05515	-2.07656	-3.23583	-1.59227	-1.11241	-0.316911	-0.16391	-0.689514	-3.05465	-1.85934	-0.969517	-1.00254	-1.17078	-1.45761	2	___1	+	Col-0_W_Col-0_D					0.98103	0.000116901	97.502	69.532	53.777	-0.14056	205440000	483	0.0319178	1.37944	2.78188	0.955733	-0.0430969	-0.0583457	0.0722864	0.585479	2.27168	AT1G06950.1	483
AT1G07000	A member of EXO70 gene family, putative exocyst subunits, conserved in land plants. Arabidopsis thaliana contains 23 putative EXO70 genes, which can be classified into eight clusters on the phylogenetic tree.	EXOCYST SUBUNIT EXO70 FAMILY PROTEIN B2 (EXO70B2)	EXOCYST SUBUNIT EXO70 FAMILY PROTEIN B2 (ATEXO70B2);EXOCYST SUBUNIT EXO70 FAMILY PROTEIN B2 (EXO70B2)	S	149	1.28072	0.188091	-0.422552	0.456802	-0.171854	-0.155624	-3.43048	0.772919	0.811778	-0.140293	1.15447	0.129475	-0.404308	-0.363649	-2.95301	-3.30629	0.217047	3	___1							0.997796	4.50662e-14	109.14	98.795	98.892	0.18042	449060000	149	0.29897	1.12203	1.13682	0.648171	-0.533433	-0.485012	0.0673187	2.38985	2.32872	AT1G07000.1	149
AT1G07110	Encodes the bifunctional enzyme fructose-6-phosphate 2-kinase/fructose-2,6-bisphosphatase.	FRUCTOSE-2,6-BISPHOSPHATASE (F2KP)	FRUCTOSE-2,6-BISPHOSPHATASE (F2KP); (ATF2KP); (FKFBP)	S	234	-0.215986	-0.654728	-0.630167	-1.00774	-1.62943	-1.5876	-1.00675	-0.821337	-0.342166	-0.344013	-2.795	-1.26843	-3.07725	-0.86022	-1.61608	-1.55978	-0.752302	2	___1							0.999998	3.26806e-39	201.67	163.99	168.09	-0.33602	525150000	234	0.0509393	0.634125	2.43321	0.478418	0.474022	0.765708	0.0734421	0.682234	2.25902	AT1G07110.1;AT3G30200.1	234;144
AT1G07110	Encodes the bifunctional enzyme fructose-6-phosphate 2-kinase/fructose-2,6-bisphosphatase.	FRUCTOSE-2,6-BISPHOSPHATASE (F2KP)	FRUCTOSE-2,6-BISPHOSPHATASE (F2KP); (ATF2KP); (FKFBP)	S	244	-3.9813	-3.08122	-3.27534	-4.20194	-1.23091	-1.53791	-2.04041	-4.23949	-3.55482	-2.95758	-4.11691	-3.55446	-3.61712	-3.5623	-3.93013	-2.74606	-4.42293	2	___1							0.864156	1.6697e-09	133.86	113.07	133.86	-1.0279	52980000	244	0.109736	-1.37277	-1.87617	0.16292	1.31578	1.63527	0.906641	0.0647605	0.123341	AT1G07110.1;AT3G30200.1	244;154
AT1G07110	Encodes the bifunctional enzyme fructose-6-phosphate 2-kinase/fructose-2,6-bisphosphatase.	FRUCTOSE-2,6-BISPHOSPHATASE (F2KP)	FRUCTOSE-2,6-BISPHOSPHATASE (F2KP); (ATF2KP); (FKFBP)	S	16	-0.773117	-2.81625	-1.73104	-3.08899	0.240171	0.280979	-2.95594	-0.679415	-1.48724	-1.84966	-1.31929	-1.36699	-0.34948	-1.63399	-2.03389	-2.73994	-1.45507	2	___1							1	4.42408e-65	243.99	220.28	241.65	-0.7765	259840000	16	0.202951	-1.3238	-1.42894	0.737834	0.338269	0.35392	0.971808	-0.0260495	-0.0371431	AT1G07110.1	16
AT1G07110	Encodes the bifunctional enzyme fructose-6-phosphate 2-kinase/fructose-2,6-bisphosphatase.	FRUCTOSE-2,6-BISPHOSPHATASE (F2KP)	FRUCTOSE-2,6-BISPHOSPHATASE (F2KP); (ATF2KP); (FKFBP)	S	216	-0.00994492	-0.88982	-0.289762	-0.562321	-0.774876	0.0774231	-0.595959	-0.479918	-0.698817	0.538483	-0.577461	-1.2366	-0.953276	-1.1181	-1.68689	-1.53246	-1.47538	2	___1			+	Col-0_D_ost1_D	+	Col-0_W_5A-1_W	0.999996	2.36577e-05	157.75	88.899	156.16	0.56669	921180000	216	0.984376	0.00537014	0.0204125	0.0342004	0.659328	2.88966	0.00437762	1.12695	4.92523	AT1G07110.1	216
AT1G07110	Encodes the bifunctional enzyme fructose-6-phosphate 2-kinase/fructose-2,6-bisphosphatase.	FRUCTOSE-2,6-BISPHOSPHATASE (F2KP)	FRUCTOSE-2,6-BISPHOSPHATASE (F2KP); (ATF2KP); (FKFBP)	S	220	1.02616	0.590048	0.945473	0.774292	-1.86943	-1.50618	0.338209	0.983635	0.863389	1.26925	0.0644112	-0.75593	-1.39396	-0.234325	-0.178152	0.0932102	0.497385	2	___1					+	Col-0_W_5A-1_W	0.999935	2.35271e-19	167.61	137.88	138.22	-0.081307	9367600000	220	0.103106	1.34744	1.92112	0.759134	0.281296	0.323886	0.0176763	0.696513	3.47907	AT1G07110.1	220
AT1G07110	Encodes the bifunctional enzyme fructose-6-phosphate 2-kinase/fructose-2,6-bisphosphatase.	FRUCTOSE-2,6-BISPHOSPHATASE (F2KP)	FRUCTOSE-2,6-BISPHOSPHATASE (F2KP); (ATF2KP); (FKFBP)	S	303	5.39692	4.53321	4.29449	5.01195	3.2156	3.32247	4.51413	5.35427	5.42446	5.98373	5.85175	4.46418	4.84615	4.85952	4.54041	4.85822	5.26655	2	___1							0.999993	7.81732e-38	260.81	223.63	238.13	-0.44807	12342000000	303	0.258642	0.707529	1.24766	0.357818	-0.621668	-1.01236	0.825083	-0.0792519	-0.232886	AT1G07110.1	303
AT1G07110	Encodes the bifunctional enzyme fructose-6-phosphate 2-kinase/fructose-2,6-bisphosphatase.	FRUCTOSE-2,6-BISPHOSPHATASE (F2KP)	FRUCTOSE-2,6-BISPHOSPHATASE (F2KP); (ATF2KP); (FKFBP)	S	276	4.18201	3.65507	3.62943	3.21661	2.93444	3.33965	3.9998	3.6128	4.48223	5.00862	4.36337	4.11667	4.40166	3.6456	4.52476	3.11734	2.79703	2	___1							1	5.5068e-32	254.34	222.01	254.34	0.14425	6185100000	276	0.530533	0.199105	0.66539	0.131313	-0.58297	-1.80263	0.719062	0.19107	0.380703	AT1G07110.1	276
AT1G07630	Encodes a protein phosphatase 2C like gene, similar to POL. Involved in leaf development. Knockout mutants have abnormally shaped leaves.	POL-LIKE 5 (PLL5)	POL-LIKE 5 (PLL5)	S	134	-1.55725	-2.16343	-2.28673	-4.08191	-3.83726	-3.56767	-2.31103	-1.84739	-1.56603	-1.40848	-1.32951	-0.52298	-2.74664	-1.60196	-3.0376	-2.24025	-2.12606	2	___1							1	0.0012107	94.616	74.313	77.379	-0.68676	80900000	134	0.629905	0.368509	0.507514	0.166457	-1.26698	-1.6186	0.93997	-0.0543596	-0.0791672	AT1G07630.1;AT2G28890.1	134;131
AT1G07650	Leucine-rich repeat receptor-like kinase with extracellular malectin-like domain, which possesses cell death induction activity in plant leaves.	LEUCINE-RICH REPEAT RECEPTOR-LIKE KINASE WITH EXTRACELLULAR MALECTIN-LIKE DOMAIN 1 (LMK1)	LEUCINE-RICH REPEAT RECEPTOR-LIKE KINASE WITH EXTRACELLULAR MALECTIN-LIKE DOMAIN 1 (LMK1)	S	776	-2.90087	-2.94087	-2.1088	-2.5505	-3.44147	-4.0095	-2.79434	0.381926	0.574227	1.1011	0.436487	-0.802553	-1.21151	-2.99745	-2.18219	-3.36566	-3.29867	2	___1							0.999742	0.000134179	100.55	48.064	100.55	-0.69533	103400000	776	0.878573	-0.159416	-0.159414	0.5647	-0.79534	-0.616251	NaN	0	NaN	AT1G07650.4;AT1G07650.3;AT1G07650.1;AT1G07650.2	776;963;989;995
AT1G07705	NOT2 / NOT3 / NOT5 family;(source:Araport11)	NEGATIVE ON TATA LESS2A (NOT2A)	NEGATIVE ON TATA LESS2A (NOT2A)	S	151	-1.13634	-2.02125	-0.218105	-3.5107	-0.768349	-1.11292	-0.972668	-1.03098	-0.33011	-1.53248	-0.73348	-0.577879	-0.509411	-1.09548	-2.38587	-2.78316	-3.02639	2	___1							0.774638	0.00467794	78.902	53.78	71.98	1.2349	192530000	151	0.327898	-0.750371	-1.06487	0.228325	-0.243637	-1.37232	0.28488	1.01021	1.19722	AT1G07705.1;AT1G07705.2	151;151
AT1G07990	SIT4 phosphatase-associated family protein;(source:Araport11)	0	0	S	7	0.886097	0.0762081	-0.00264359	0.71752	1.33033	1.04754	2.05374	1.81991	1.43956	0.873432	1.24962	1.2733	1.01126	0.464069	0.688343	0.666624	1.10875	2	___1	+	Col-0_W_Col-0_D					0.999936	4.86107e-14	151.9	140.33	151.9	0.33718	910560000	7	0.0117407	-1.14359	-3.57307	0.112255	0.646672	1.92467	0.22601	-0.401942	-1.38032	AT1G07990.1;AT1G07990.2	7;7
AT1G07990	SIT4 phosphatase-associated family protein;(source:Araport11)	0	0	S	508	4.85902	3.59862	3.26092	3.61637	4.07803	4.2422	4.95998	5.33621	4.9563	4.2463	4.93945	4.65521	4.72254	5.12892	3.88787	4.19237	4.71157	3	___1							0.999993	7.36844e-87	264.31	251.75	248.43	-0.54111	10560000000	508	0.124966	-0.820375	-1.78237	0.647101	-0.18145	-0.48663	0.394414	-0.430204	-0.931367	AT1G07990.1;AT1G07990.2	508;508
AT1G08420	Protein phosphatase which promotes stomatal ACD by establishing kinase-based signalling asymmetry in the two daughter cells.	BRI1 SUPPRESSOR 1 (BSU1)-LIKE 2 (BSL2)	BRI1 SUPPRESSOR 1 (BSU1)-LIKE 2 (BSL2)	S	970	2.01928	1.83548	2.22126	1.78188	1.78406	1.84657	-3.27923	2.09589	2.39286	2.4243	2.45444	2.33012	2.17172	-3.01645	1.57255	-3.2066	2.31758	2	___1							0.975642	1.77762e-30	199.58	189.52	144.33	-0.16267	2295000000	970	0.33909	1.35265	1.03844	0.958358	0.116693	0.0548823	0.285524	1.73663	1.19542	AT1G08420.2;AT1G08420.1	970;975
AT1G08420	Protein phosphatase which promotes stomatal ACD by establishing kinase-based signalling asymmetry in the two daughter cells.	BRI1 SUPPRESSOR 1 (BSU1)-LIKE 2 (BSL2)	BRI1 SUPPRESSOR 1 (BSU1)-LIKE 2 (BSL2)	S	622	2.68112	1.87218	1.91606	1.75788	2.31754	2.66384	2.47661	3.09281	2.63112	2.64141	2.64314	2.72482	2.82778	2.30183	1.79223	1.91528	2.22727	2	___1							1	6.48139e-30	242.94	218.08	80.312	0.055888	4659400000	622	0.0742529	-0.580892	-2.15828	0.938087	0.0195567	0.0816581	0.784246	0.0785487	0.288909	AT1G08420.2;AT1G08420.1;AT2G27210.2;AT2G27210.1	622;627;611;616
AT1G08420	Protein phosphatase which promotes stomatal ACD by establishing kinase-based signalling asymmetry in the two daughter cells.	BRI1 SUPPRESSOR 1 (BSU1)-LIKE 2 (BSL2)	BRI1 SUPPRESSOR 1 (BSU1)-LIKE 2 (BSL2)	S	653	-0.18882	0.842876	0.787174	0.349985	0.325544	-0.373369	0.856976	-2.28988	-4.27603	-3.09885	-2.85334	0.187765	-3.59962	-2.54312	0.255972	0.00506973	-2.2794	2	___1							0.999299	0.0118814	63.212	45.826	53.567	-0.83838	517060000	653	0.304167	0.817987	1.12347	0.251687	1.61481	1.29564	0.186229	1.12059	1.53142	AT1G08420.2;AT1G08420.1;AT2G27210.2;AT2G27210.1	653;658;642;647
AT1G08640	Encodes a choloroplast membrane protein CJD1 (Chloroplast J-like Domain 1). Predicted to contain a transit peptide, three transmembrane domains and an N-terminal J-like domain. Influences fatty acid composition of chloroplast lipids.	CHLOROPLAST J-LIKE DOMAIN 1 (CJD1)	CHLOROPLAST J-LIKE DOMAIN 1 (CJD1)	S	136	1.08506	-0.186251	0.0808163	0.076746	-0.949715	-2.67898	1.43648	2.18856	0.714959	0.754383	1.39695	-3.64546	0.146023	-1.4295	0.755993	0.171448	0.530088	2	___1							0.999999	0.00357289	96.143	69.096	95.523	-0.66141	900150000	136	0.825447	0.265007	0.230385	0.35426	1.64206	1.0206	0.566285	-0.22175	-0.613654	AT1G08640.1	136
AT1G08680	A member of ARF GAP domain (AGD), A thaliana has 15 members, grouped into four classes. AGD14 belongs to the class 4, together with AGD15.	ARF GAP-LIKE ZINC FINGER-CONTAINING PROTEIN ZIGA4 (ZIGA4)	ARF GAP-LIKE ZINC FINGER-CONTAINING PROTEIN ZIGA4 (ZIGA4)	S	225	0.000623703	-0.852692	-0.459555	-0.57181	-2.74703	-1.83575	-0.909163	0.198442	0.328967	0.465797	0.189047	-3.56306	-3.12922	-0.13579	-0.378288	-0.0425072	0.0394192	2	___1							0.84554	0.00034653	91.076	71.418	91.076	-0.088295	287330000	225	0.241087	0.852517	1.30068	0.452685	0.952647	0.813937	0.204632	-0.343733	-1.45803	AT1G08680.5;AT1G08680.2;AT1G08680.1;AT1G08680.4	225;225;225;225
AT1G08680	A member of ARF GAP domain (AGD), A thaliana has 15 members, grouped into four classes. AGD14 belongs to the class 4, together with AGD15.	ARF GAP-LIKE ZINC FINGER-CONTAINING PROTEIN ZIGA4 (ZIGA4)	ARF GAP-LIKE ZINC FINGER-CONTAINING PROTEIN ZIGA4 (ZIGA4)	S	192	-1.13762	-1.30808	-1.46622	-3.2378	-3.60705	-3.33275	-1.48914	-1.42054	-1.07202	-0.726301	-1.25509	-1.89292	-1.31636	-1.52353	-1.80423	-1.30664	-3.1974	2	___1							0.988571	0.000342462	97.86	88.856	97.86	-0.65356	216590000	192	0.409575	0.674941	0.886291	0.265478	-0.884766	-1.2534	0.690379	0.315328	0.422258	AT1G08680.5;AT1G08680.2;AT1G08680.1;AT1G08680.4	192;192;192;192
AT1G08680	A member of ARF GAP domain (AGD), A thaliana has 15 members, grouped into four classes. AGD14 belongs to the class 4, together with AGD15.	ARF GAP-LIKE ZINC FINGER-CONTAINING PROTEIN ZIGA4 (ZIGA4)	ARF GAP-LIKE ZINC FINGER-CONTAINING PROTEIN ZIGA4 (ZIGA4)	S	196	-0.906876	-2.387	-0.343637	-1.05149	-2.90089	-2.45239	-1.2036	-0.947773	-0.342671	0.270195	-0.697186	-2.0161	-3.15122	-0.764795	-1.19931	-0.754295	-0.729664	2	___1							0.999973	2.4207e-05	118.87	100.81	96.64	0.38855	283040000	196	0.314827	0.703911	1.0967	0.904777	0.101208	0.125819	0.621065	-0.27783	-0.526481	AT1G08680.5;AT1G08680.2;AT1G08680.1;AT1G08680.4	196;196;196;196
AT1G08680	A member of ARF GAP domain (AGD), A thaliana has 15 members, grouped into four classes. AGD14 belongs to the class 4, together with AGD15.	ARF GAP-LIKE ZINC FINGER-CONTAINING PROTEIN ZIGA4 (ZIGA4)	ARF GAP-LIKE ZINC FINGER-CONTAINING PROTEIN ZIGA4 (ZIGA4)	S	236	1.32992	0.818304	0.716042	0.963327	0.466301	0.952721	0.648226	1.78697	1.78659	1.23812	1.50314	-0.367243	0.769135	1.18693	0.727713	0.937784	1.52524	2	___1							1	8.12318e-27	200.97	166.79	200.97	-1.6764	889360000	236	0.984159	-0.00665617	-0.0206962	0.442108	0.433947	0.834352	0.693253	-0.106682	-0.418058	AT1G08680.5;AT1G08680.2;AT1G08680.1;AT1G08680.4;AT1G08680.3	236;236;236;236;194
AT1G08680	A member of ARF GAP domain (AGD), A thaliana has 15 members, grouped into four classes. AGD14 belongs to the class 4, together with AGD15.	ARF GAP-LIKE ZINC FINGER-CONTAINING PROTEIN ZIGA4 (ZIGA4)	ARF GAP-LIKE ZINC FINGER-CONTAINING PROTEIN ZIGA4 (ZIGA4)	S	247	0.788311	-0.00320435	-0.35277	0.62944	-3.61644	-2.41701	-0.0709229	1.15136	0.799939	-0.244175	0.615847	-3.56693	-3.88931	0.368761	0.268295	0.0671577	-1.35792	4	___1							0.992339	4.2743e-12	94.75	74.043	81.179	0.5401	402770000	247	0.226954	1.5037	1.34592	0.542229	1.12424	0.653602	0.306647	0.606266	1.13813	AT1G08680.5;AT1G08680.2;AT1G08680.1;AT1G08680.4;AT1G08680.3	247;247;247;247;205
AT1G08720	enhanced disease resistance 1 (EDR1) confers resistance to powdery mildew disease caused by the fungus Erysiphe cichoracearum The mRNA is cell-to-cell mobile.	ENHANCED DISEASE RESISTANCE 1 (EDR1)	ENHANCED DISEASE RESISTANCE 1 (EDR1); (ATEDR1)	S	476	-2.19277	-2.97486	-1.85827	-1.93984	0.410603	0.24054	-1.12359	-2.11255	-2.09911	-2.19547	-2.68168	-1.38159	-1.23758	-3.05007	-3.33008	-2.63747	-3.04498	2	___1	+	Col-0_W_Col-0_D					1	2.19983e-16	184.76	135.35	102.73	0.38162	178480000	476	0.0493379	-1.59519	-2.45673	0.20697	1.24349	1.44916	0.078043	0.762743	2.21063	AT1G08720.1;AT1G08720.2	476;476
AT1G08760	CORD2 is a member of a novel and plant specific family of microtubule associated proteins. CORD1 binds microtubules via a conserved protein domain shared among family members. CORD functions may overlap;cord1 / cord2 mutants have defects in secondary cell wall pit morphology.	CORTICAL MICROTUBULE DISORDERING2 (CORD2)	CORTICAL MICROTUBULE DISORDERING2 (CORD2)	S	616	-1.55492	-3.10033	-1.36896	-1.29976	-2.32763	-3.47959	-3.43088	-1.97338	-3.17761	-3.82946	-4.00391	-3.25131	-3.05581	-0.940304	-1.48607	-1.33648	-1.20509	2	___1							0.998175	4.63182e-05	98.676	73.355	98.676	0.84305	93069000	616	0.141187	0.971874	1.69409	0.635538	-0.387061	-0.504215	0.381512	-0.488447	-0.959198	AT1G08760.1	616
AT1G08760	CORD2 is a member of a novel and plant specific family of microtubule associated proteins. CORD1 binds microtubules via a conserved protein domain shared among family members. CORD functions may overlap;cord1 / cord2 mutants have defects in secondary cell wall pit morphology.	CORTICAL MICROTUBULE DISORDERING2 (CORD2)	CORTICAL MICROTUBULE DISORDERING2 (CORD2)	S	299	-2.18567	-2.14901	-2.43499	-3.40146	-3.02649	-1.98028	-3.75114	-1.98832	-1.8752	-1.71136	-2.11787	-2.90747	-4.18324	-2.26044	-2.56101	-2.80161	-2.09658	2	___1							1	0.00158997	88.681	62.008	61.999	-0.016788	48806000	299	0.79213	0.143776	0.275561	0.563208	0.430491	0.618701	0.890062	-0.0563791	-0.145418	AT1G08760.1	299
AT1G08800	myosin-binding protein (Protein of unknown function, DUF593);(source:Araport11)	MYOSIN BINDING PROTEIN 1 (MYOB1)	MYOSIN BINDING PROTEIN 1 (MYOB1)	S	825	-0.552231	-3.0674	-1.84422	-2.89943	-2.74744	-3.29856	-3.15165	-1.62642	-0.121758	-0.688471	-1.18057	-2.39618	-2.31085	-2.01817	-3.45907	-3.17835	-0.496134	2	___1							0.971773	3.70536e-05	114.71	82.187	111.63	0.48411	70984000	825	0.408462	0.615194	0.888529	0.356935	-0.464283	-1.0144	0.794836	0.287028	0.274286	AT1G08800.4;AT1G08800.3;AT1G08800.2;AT1G08800.1	825;825;825;825
AT1G08800	myosin-binding protein (Protein of unknown function, DUF593);(source:Araport11)	MYOSIN BINDING PROTEIN 1 (MYOB1)	MYOSIN BINDING PROTEIN 1 (MYOB1)	S	190	1.83196	-2.68336	-2.78866	0.734108	-0.421391	-0.415089	0.0152378	1.4074	1.44106	1.07756	1.47574	0.31588	-0.0931225	0.932598	-3.20971	1.40166	1.54536	2	___1							0.999644	5.58652e-28	185.71	136.89	176.04	0.70787	674870000	190	0.513813	-0.873027	-0.693704	0.692569	-0.238578	-0.419056	0.752036	-0.63892	-0.333854	AT1G08800.4;AT1G08800.3;AT1G08800.2;AT1G08800.1	190;190;190;190
AT1G08820	Encodes VAP33-like protein that interacts with cowpea mosaic virus protein 60K. Is a SNARE-like protein that may be involved in vesicular transport to or from the ER.	VAMP/SYNAPTOBREVIN-ASSOCIATED PROTEIN 27-2 (VAP27-2)	VAMP/SYNAPTOBREVIN-ASSOCIATED PROTEIN 27-2 (VAP27-2)	S	130	0.302374	0.268904	-0.0758362	0.264698	-0.105066	0.328796	0.655853	0.872765	0.340878	0.0741177	0.456013	0.328297	-0.692572	1.10837	-0.360344	0.204948	0.447483	2	___1							0.992809	2.75037e-10	138.66	115.18	120.24	0.53197	1199800000	130	0.323519	-0.248052	-1.07542	0.72142	0.190057	0.377322	0.699054	0.0926723	0.409605	AT1G08820.5;AT1G08820.4;AT1G08820.3;AT1G08820.2;AT1G08820.1	130;130;130;130;130
AT1G54690	Encodes HTA3, a histone H2A protein. H2AX is a meiosis-specific isoform of histone H2A. Upon DSB formation, rapid accumulation of phosphorylated H2AX (&#947;-H2AX) occurs around the break site. _x0001_H2AX foci accumulate in early G2. Immunolocalization studies in spread preparations of wild-type meiocytes at G2/early leptotene revealed the accumulation of numerous rather diffuse &#947;-H2AX foci…	GAMMA HISTONE VARIANT H2AX (GAMMA-H2AX)	GAMMA HISTONE VARIANT H2AX (GAMMA-H2AX);GAMMA H2AX (G-H2AX); (H2AXb);HISTONE H2A 3 (HTA3)	S	139	-2.2693	-1.67793	-1.74688	-3.02719	0.164928	-1.80848	-2.61582	-3.57375	-2.6611	-2.73682	-3.30851	-3.26795	-0.981262	-1.68161	-3.89976	-3.41512	-2.55118	2	___1							0.995366	0.000229419	91.656	84.76	91.656	0.3448	145500000	139	0.8034	-0.222045	-0.260212	0.987088	0.0186603	0.0170079	0.0752215	1.10836	2.23993	AT1G54690.1;AT1G08880.1	139;139
AT1G54720	early-responsive to dehydration protein-related / ERD protein-like protein;(source:Araport11)	0	0	S	17	-1.71687	-1.75861	-2.32405	-2.71208	-3.38923	-3.19469	-3.8067	-3.47502	-2.04121	-1.76237	-2.98708	-4.16362	-4.18309	-2.80032	-2.85546	-2.66347	-3.57258	2	___1	+	Col-0_W_Col-0_D					0.999999	0.0078016	96.331	17.997	96.331	0.073102	61089000	17	0.00260204	1.3385	4.94072	0.571277	0.249271	0.6055	0.0565053	0.902601	2.47036	AT1G54720.1;AT1G08930.2;AT1G08930.1	17;17;17
AT1G09140	Encodes a serine-arginine rich RNA binding protein involved in regulation of splicing (including splicing of itself). Exists as 3 alternative spliced forms that are differentially expressed. AT1G09140.1 predominantly accumulates in the cytosol in light grown plants.Barta et al (2010) have proposed a nomenclature for Serine/Arginine-Rich Protein Splicing Factors (SR proteins): Plant Cell. 2010, 22…	SERINE/ARGININE-RICH PROTEIN SPLICING FACTOR 30 (SR30)	SERINE/ARGININE-RICH PROTEIN SPLICING FACTOR 30 (SR30);SERINE-ARGININE PROTEIN 30 (ATSRP30);SERINE/ARGININE-RICH PROTEIN SPLICING FACTOR 30 (At-SR30)	S	87	-3.17619	-3.23406	-3.17385	-2.61521	-2.06421	-1.48086	-2.04781	-3.31504	-3.38961	-2.51287	-2.77382	-2.86002	-3.45699	-2.47238	-3.68113	-3.59042	-4.26077	2	___1					+	Col-0_W_5A-1_W	0.993657	0.00550184	93.111	17.987	65.719	0.1229	49475000	87	0.0938218	-0.822844	-1.98919	0.232127	0.702813	1.35936	0.0232371	0.79428	3.22879	AT1G09140.3;AT1G09140.2;AT1G09140.1	87;87;87
AT1G09210	Encodes one of three Arabidopsis calreticulins.Post-transcriptionally regulates together with CRT1 VAMP721/722 levels under ER stress.	CALRETICULIN 1B (CRT1b)	CALRETICULIN 2 (CRT2); (AtCRT1b);CALRETICULIN 1B (CRT1b)	S	381	0.0446911	0.229895	-0.345085	-0.327967	-2.97898	-1.75569	-2.44699	-2.1525	-0.365308	-1.26859	-2.49567	0.867739	-0.43556	0.685013	0.536449	0.616722	-2.68361	3	___1	+	Col-0_W_Col-0_D	+	Col-0_D_ost1_D			1	5.12418e-28	159.03	150.43	159.03	-0.12323	722100000	381	0.000270987	2.23392	7.59576	0.0019633	-2.70594	-5.91795	0.675662	0.410531	0.443907	AT1G09210.1	381
AT1G09230	Encodes a U12-type spliceosomal protein that is an indispensible component of the minor spliceosome and plays a crucial role in U12 intron splicing and plant development.	U11/U12-65K (U11/U12-65K)	U11/U12-65K (U11/U12-65K)	S	253	0.211176	-0.727131	-3.63206	-3.03714	-0.835918	-0.527029	-0.437254	-0.300467	-0.50814	-2.99597	-2.43855	-0.173481	-0.783594	-0.363537	-1.11931	-4.00622	-0.800327	3	___1							0.999979	1.73199e-05	98.121	79.009	98.121	-1.5536	228520000	253	0.217917	-1.27112	-1.37619	0.691497	-0.084963	-0.420623	0.901846	0.178997	0.129719	AT1G09230.2;AT1G09230.3;AT1G09230.1	253;301;301
AT1G09730	Encodes a SUMO protease that positively regulates the transition to flowering in long and short days. Along with SPF2, its activity is required for fertility as asp1/spf2 double mutants have defects in gametogenesis and embroygenesis.	ARABIDOPSIS SUMO PROTEASE 1 (ASP1)	ARABIDOPSIS SUMO PROTEASE 1 (ASP1);SUMO PROTEASE RELATED TO FERTILITY1 (SPF1)	S	32	0.634222	0.0981731	0.167994	-0.0656185	-3.80246	-1.43633	0.219942	0.640484	0.451974	0.344391	0.273945	0.423414	0.324329	0.860971	0.380533	0.287659	0.391821	2	___1							0.99999	6.88965e-09	132.86	104.13	120.3	-1.4817	763680000	32	0.2481	1.30328	1.2791	0.232357	-1.63083	-1.35858	0.457367	-0.144645	-0.805016	AT1G09730.2;AT1G09730.1	32;32
AT1G09730	Encodes a SUMO protease that positively regulates the transition to flowering in long and short days. Along with SPF2, its activity is required for fertility as asp1/spf2 double mutants have defects in gametogenesis and embroygenesis.	ARABIDOPSIS SUMO PROTEASE 1 (ASP1)	ARABIDOPSIS SUMO PROTEASE 1 (ASP1);SUMO PROTEASE RELATED TO FERTILITY1 (SPF1)	S	921	-0.205626	1.15438	0.912218	-3.20142	-0.427486	-3.64648	-2.88742	-1.66977	-1.63124	-3.03043	-2.80012	0.414768	-1.99169	0.0450096	0.310234	0.609707	-2.92938	2	___1							0.997504	3.69434e-05	106.17	69.193	102.73	-0.19802	423340000	921	0.187132	1.82268	1.48872	0.175399	-1.64715	-1.57799	0.834042	0.334701	0.220718	AT1G09730.2;AT1G09730.1	921;953
AT1G09780	Encodes a 2,3-biphosphoglycerate-independent phosphoglycerate mutase that is involved in pollen development and stomatal movement.	2,3-BIPHOSPHOGLYCERATE-INDEPENDENT PHOSPHOGLYCERATE MUTASE 1 (iPGAM1)	2,3-BIPHOSPHOGLYCERATE-INDEPENDENT PHOSPHOGLYCERATE MUTASE 1 (iPGAM1)	S	82	2.59634	1.25107	1.67893	1.81906	4.2459	4.08678	3.09949	1.50026	0.479568	-3.70854	0.0495186	3.72225	2.54656	2.62322	1.88209	2.13575	1.79417	4	___1							1	1.5883e-77	240.64	225.13	163.92	0.31741	5621100000	82	0.0895253	-1.39676	-2.02302	0.753554	0.269092	0.331719	0.780239	-0.100986	-0.294461	AT1G09780.1;AT3G08590.2;AT3G08590.1	80;82;82
AT1G10140	Uncharacterized conserved protein UCP031279;(source:Araport11)	0	0	S	136	-2.49308	-2.96599	-3.15412	-3.09014	-3.5135	-2.69348	-2.80883	-2.52239	-4.00595	-4.16568	-2.62177	-2.29331	-4.52962	-3.52199	-3.13339	-3.0679	-3.36531	2	___1							0.986298	2.74175e-05	95.651	77.95	95.651	-2.7573	35188000	136	0.880916	-0.0412811	-0.156309	0.389992	0.563755	0.940822	0.229556	0.263036	1.36811	AT1G10140.1	136
AT1G10290	involved in trafficking from the trans-Golgi Network to the central vacuole. The mRNA is cell-to-cell mobile.	DYNAMIN-LIKE PROTEIN 6 (ADL6)	DYNAMIN-LIKE PROTEIN 6 (ADL6);DYNAMIN-RELATED PROTEIN 2A (DRP2A)	S	533	-3.83658	-3.25531	-2.2944	-3.38714	-3.27357	0.83732	1.28421	1.51885	2.10221	2.62947	-3.37416	2.05377	-0.312748	2.27311	1.28205	1.7359	1.4241	2	___1	+	Col-0_W_Col-0_D			+	Col-0_W_5A-1_W	0.938219	1.73767e-06	113.65	107.05	108.63	0.56575	719620000	533	0.0314614	-3.28506	-2.79279	0.445717	-1.24634	-0.827346	8.0606e-05	-4.67404	-11.6867	AT1G10290.1	533
AT1G10290	involved in trafficking from the trans-Golgi Network to the central vacuole. The mRNA is cell-to-cell mobile.	DYNAMIN-LIKE PROTEIN 6 (ADL6)	DYNAMIN-LIKE PROTEIN 6 (ADL6);DYNAMIN-RELATED PROTEIN 2A (DRP2A)	S	712	-0.664114	-0.86046	-0.445261	-1.1393	-0.0265808	0.549782	-1.83562	-3.53988	-0.389737	-0.232288	-1.98171	-3.4498	-2.56673	-2.64652	-0.443836	0.206129	0.133844	2	___1					+	Col-0_W_5A-1_W	0.999753	3.91669e-05	110.44	84.376	110.44	-0.89426	324950000	712	0.658898	0.435791	0.464159	0.19584	1.67461	1.49226	0.0290702	-0.742663	-3.03034	AT1G10290.1	712
AT1G10290	involved in trafficking from the trans-Golgi Network to the central vacuole. The mRNA is cell-to-cell mobile.	DYNAMIN-LIKE PROTEIN 6 (ADL6)	DYNAMIN-LIKE PROTEIN 6 (ADL6);DYNAMIN-RELATED PROTEIN 2A (DRP2A)	S	877	-3.31156	-2.98069	-3.91893	-3.43421	-2.0756	-2.37901	-3.3032	-3.3914	-1.97791	-2.39514	-4.10674	-0.0925407	-2.8208	-0.630831	-3.51298	-3.09762	-3.5036	3	___1							0.993169	0.000169377	77.693	67.845	77.693	0.29523	71386000	877	0.154129	-0.624042	-1.63045	0.100863	-1.60592	-2.00831	0.882557	-0.0399451	-0.155438	AT1G10290.1	877
AT1G10450	Encodes SIN3-like 6, a homolog of the transcriptional repressor SIN3 (AT1G24190).	0	0	S	698	-0.0750008	-0.0908604	0.058506	-0.10858	0.598515	0.196907	0.757309	-0.0530071	0.0620775	0.330397	0.091238	-2.69828	-0.0392742	0.596144	-0.624882	-0.0487232	-0.241489	2	___1							0.99137	3.08627e-37	244.56	205.52	155.28	0.68972	521860000	698	0.0636772	-0.428915	-2.26989	0.267186	1.08873	1.2483	0.152108	0.251048	1.68854	AT1G10450.1;AT1G10450.2;AT1G10450.3	698;698;749
AT1G10490	GNAT acetyltransferase (DUF699);(source:Araport11)	0	0	S	661	0.169722	0.0142536	-0.221987	0.293993	-1.3734	-3.73633	0.464464	1.96498	1.49299	0.900303	1.6273	0.46385	0.251106	1.63686	0.270061	0.368641	1.20221	3	___1							0.985357	6.90952e-28	157.42	141.62	125.96	0.064194	605450000	661	0.573691	0.734068	0.594828	0.376387	-1.45401	-0.970464	0.10704	-0.549641	-1.96181	AT1G10490.2;AT1G10490.1	661;661
AT1G10760	Encodes an &#945;-glucan, water dikinase required for starch degradation. Involved in cold-induced freezing tolerance. Mutations that eliminate the GWD protein or affect the dikinase domain of the enzyme dramatically reduce both the amount of phosphate in the amylopectin and the rate of starch degradation. Mature leaves of these mutants accumulate amounts of starch up to seven times greater than …	STARCH EXCESS 1 (SEX1)	STARCH EXCESS 1 (SEX1); (SOP1); (SOP); (GWD1); (GWD)	S	410	-2.25397	-2.48639	-4.07956	-3.93182	-0.90589	-1.78585	-0.451082	-0.171722	-1.45821	-2.81851	-3.61835	-3.19633	-2.66475	-1.03633	-3.07035	-3.88452	-2.74065	2	___1	+	Col-0_W_Col-0_D					0.999999	3.53782e-06	107.57	97.613	107.57	1.3625	227120000	410	0.00725322	-2.3593	-3.98362	0.0848157	1.4705	2.14466	0.947172	0.0439059	0.0696494	AT1G10760.3;AT1G10760.2;AT1G10760.1	410;410;410
AT1G10760	Encodes an &#945;-glucan, water dikinase required for starch degradation. Involved in cold-induced freezing tolerance. Mutations that eliminate the GWD protein or affect the dikinase domain of the enzyme dramatically reduce both the amount of phosphate in the amylopectin and the rate of starch degradation. Mature leaves of these mutants accumulate amounts of starch up to seven times greater than …	STARCH EXCESS 1 (SEX1)	STARCH EXCESS 1 (SEX1); (SOP1); (SOP); (GWD1); (GWD)	S	210	-3.31218	-2.5098	-2.81798	-2.93094	-1.17909	-0.433187	-2.08328	-1.21067	-1.59254	-2.05123	-2.90619	-3.69522	-4.15073	-3.16026	-2.42128	-3.31151	-3.7881	2	___1	+	Col-0_W_Col-0_D	+	Col-0_D_ost1_D			1	0.000110369	93.237	68.444	93.237	3.1558	56909000	210	0.00441089	-1.66617	-4.43257	0.00333678	2.44218	5.24617	NaN	0	NaN	AT1G10760.3;AT1G10760.2;AT1G10760.1	210;210;210
AT1G10870	A member of ARF GAP domain (AGD), A thaliana has 15 members, grouped into four classes. AGD4 belongs to the Class 1, together with AGD1, AGD2, and AGD3.	VAN3-LIKE PROTEIN3 (VAL3)	VAN3-LIKE PROTEIN3 (VAL3)	S	359	-0.400234	0.00303459	-0.0326366	0.0951347	-1.10285	-4.08714	1.3864	1.00364	1.33411	-3.08492	0.977549	-2.72355	0.899874	1.54744	-3.11538	-2.68251	-3.3018	2	___1					+	Col-0_W_5A-1_W	0.995691	3.85412e-59	261.78	231.23	234.63	0.17044	439560000	359	0.641951	0.616314	0.489376	0.756376	-0.607909	-0.327755	2.61603e-05	2.94955	14.7192	AT1G10870.1;AT1G10870.2	359;359
AT1G10900	Phosphatidylinositol 4-phosphate 5-kinase.	(PIP5K7)	(PIP5K7)	S	224	1.31682	0.969193	0.722315	0.312263	-2.9215	0.705025	0.659956	1.27443	1.325	1.73503	1.08193	0.611673	0.507751	0.702137	0.781149	0.418697	0.527639	2	___1							0.999986	2.63898e-06	142.08	113.91	140.39	-0.19072	723280000	224	0.395112	0.900671	0.915751	0.577265	-0.67771	-0.59578	0.382467	0.25432	0.95711	AT1G10900.3;AT1G10900.2;AT1G10900.1	224;224;224
AT1G10900	Phosphatidylinositol 4-phosphate 5-kinase.	(PIP5K7)	(PIP5K7)	S	241	-1.27861	-2.0095	-1.52168	-1.67415	-2.65135	-2.64603	-3.15354	-1.31095	-1.3223	-3.13954	-1.45178	-2.96228	-1.92826	-3.24424	-3.26253	-1.62966	-2.57825	2	___1							0.931869	0.00285114	82.515	56.398	71.031	1.9084	84724000	241	0.101115	0.81948	1.93519	0.656971	0.271127	0.471754	0.10249	0.869158	1.99578	AT1G10900.3;AT1G10900.2;AT1G10900.1	241;241;241
AT1G11310	A member of a large family of seven-transmembrane domain proteins specific to plants, homologs of the barley mildew resistance locus o (MLO) protein. The Arabidopsis genome contains 15 genes encoding MLO proteins, with localization in plasma membrane. Phylogenetic analysis revealed four clades of closely-related AtMLO genes. ATMLO2 belongs to the clade IV, with AtMLO3, AtMLO6 and AtMLO12. The gen…	MILDEW RESISTANCE LOCUS O 2 (MLO2)	MILDEW RESISTANCE LOCUS O 2 (MLO2);POWDERY MILDEW RESISTANT 2 (PMR2);MILDEW RESISTANCE LOCUS O 2 (ATMLO2)	S	503	-1.06621	-3.45197	-3.41531	-2.13511	-1.34731	-1.31333	-2.6847	-1.79265	-1.22752	-0.946367	-1.61588	-2.26679	-1.24026	-2.09245	-2.01928	-3.3954	-2.31112	2	___1							0.998317	0.0467354	57.347	23.387	51.762	-0.99213	89149000	503	0.306404	-0.732653	-1.11779	0.865989	0.0820065	0.177625	0.942199	0.0581175	0.0762213	AT1G11310.3;AT1G11310.1	503;565
AT1G11310	A member of a large family of seven-transmembrane domain proteins specific to plants, homologs of the barley mildew resistance locus o (MLO) protein. The Arabidopsis genome contains 15 genes encoding MLO proteins, with localization in plasma membrane. Phylogenetic analysis revealed four clades of closely-related AtMLO genes. ATMLO2 belongs to the clade IV, with AtMLO3, AtMLO6 and AtMLO12. The gen…	MILDEW RESISTANCE LOCUS O 2 (MLO2)	MILDEW RESISTANCE LOCUS O 2 (MLO2);POWDERY MILDEW RESISTANT 2 (PMR2);MILDEW RESISTANCE LOCUS O 2 (ATMLO2)	S	448	-0.217777	-4.05427	-0.583447	-1.05893	-2.58833	-1.77294	-1.68608	-4.00911	-0.00203991	-2.58047	-2.84305	-0.343266	-5.06814	-3.39682	-1.10055	-0.925215	-1.28788	2	___1							0.923768	8.61345e-19	202.32	163.54	111.39	0.25785	322380000	448	0.352586	1.03551	1.00749	0.762308	0.421962	0.31944	0.733732	-0.374057	-0.359747	AT1G11310.3;AT1G11310.1	448;510
AT1G11310	A member of a large family of seven-transmembrane domain proteins specific to plants, homologs of the barley mildew resistance locus o (MLO) protein. The Arabidopsis genome contains 15 genes encoding MLO proteins, with localization in plasma membrane. Phylogenetic analysis revealed four clades of closely-related AtMLO genes. ATMLO2 belongs to the clade IV, with AtMLO3, AtMLO6 and AtMLO12. The gen…	MILDEW RESISTANCE LOCUS O 2 (MLO2)	MILDEW RESISTANCE LOCUS O 2 (MLO2);POWDERY MILDEW RESISTANT 2 (PMR2);MILDEW RESISTANCE LOCUS O 2 (ATMLO2)	S	450	1.04281	-3.37586	-3.42646	0.0616531	-1.90118	-2.10798	-0.678038	-0.008255	1.34445	1.73515	-0.0429993	-3.32859	-3.25468	-3.13419	-0.0816593	0.681099	0.0486412	2	___1			+	Col-0_D_ost1_D			0.998555	5.26297e-16	190.1	151.32	111.39	0.25785	527910000	450	0.849178	-0.2506	-0.198541	0.0177282	2.06529	3.47634	0.289495	-1.64049	-1.18436	AT1G11310.3;AT1G11310.1	450;512
AT1G11360	Adenine nucleotide alpha hydrolases-like superfamily protein;(source:Araport11)	0	0	S	239	-0.0567379	-0.0562325	-0.170132	-0.326134	2.33675	2.1238	1.00424	0.208176	-0.125878	-0.457869	-0.3638	0.863705	1.6742	0.561117	-0.314411	-0.619806	-0.624622	3	___1	+	Col-0_W_Col-0_D			+	Col-0_W_5A-1_W	1	1.03741e-54	226.28	189.57	226.28	0.13431	1333400000	239	0.0203878	-1.57055	-3.12756	0.580106	0.385236	0.591189	0.0236698	0.367304	3.21223	AT1G11360.4;AT1G11360.3;AT1G11360.2;AT1G11360.1	239;239;239;239
AT1G11360	Adenine nucleotide alpha hydrolases-like superfamily protein;(source:Araport11)	0	0	S	23	-3.17282	-2.86749	1.31474	-3.52866	-1.06688	-1.7986	-3.04402	-0.181095	0.0309591	-0.706463	-0.325138	0.252897	-0.716854	-2.83475	0.157913	-2.74534	0.565197	2	___1							0.788287	1.42797e-46	249.19	185.46	243.3	0.12763	4687600000	23	0.688603	-0.54091	-0.420733	0.702682	-0.423082	-0.404335	0.424986	-1.38948	-0.868201	AT1G11360.4;AT1G11360.3;AT1G11360.2;AT1G11360.1	23;23;23;23
AT1G11360	Adenine nucleotide alpha hydrolases-like superfamily protein;(source:Araport11)	0	0	S	24	5.17329	5.0252	4.81425	4.93689	3.31636	-1.54095	-3.49164	4.8065	5.17288	5.03174	5.17842	-3.68339	4.5504	-3.36559	4.7041	5.23053	5.10624	3	___1							0.973502	4.54869e-60	266.89	210.33	204.89	0.46264	13560000000	24	0.0756627	4.21484	2.14465	0.640925	1.60543	0.496001	0.876424	-0.0262135	-0.16364	AT1G11360.4;AT1G11360.3;AT1G11360.2;AT1G11360.1	24;24;24;24
AT1G11480	eukaryotic translation initiation factor-like protein;(source:Araport11)	0	0	S	356	-0.912273	-2.41844	-2.95066	-3.46841	0.799238	0.68619	-0.492304	-1.03902	-0.732228	-1.59267	-1.33109	-3.48866	0.0196686	-3.26751	-3.96692	-2.90864	-1.98583	2	___1	+	Col-0_W_Col-0_D					0.999235	2.47641e-28	188.9	167.12	109.84	1.976	368150000	356	0.0143694	-2.42597	-3.40712	0.0953065	2.23403	2.05277	0.551671	0.516354	0.637787	AT1G11480.1;AT1G11480.2	356;343
AT1G11480	eukaryotic translation initiation factor-like protein;(source:Araport11)	0	0	S	498	-1.07461	-0.474295	-0.470495	-0.987396	-1.74199	-1.33987	-0.732361	-1.88565	-1.24369	-0.374062	-2.38053	-0.663309	-2.15972	-0.992844	-3.92219	-2.04549	-1.53036	3	___1					+	Col-0_W_5A-1_W	0.999809	0.000122377	107.85	81.06	79.633	-0.13319	326760000	498	0.0693146	0.673267	2.2082	0.76625	-0.153007	-0.313929	0.0407579	1.74765	2.7407	AT1G11480.1;AT1G11480.2	498;485
AT1G11650	Encodes an RNA binding protein with three RNA recognition motifs. The mRNA is cell-to-cell mobile.	(RBP45B)	(ATRBP45B); (RBP45B)	S	350	-1.82955	-1.13146	-1.09482	-3.19742	-3.53682	-3.31831	-0.53731	-1.84368	-1.80228	-1.42034	-2.40885	-0.744541	-1.95158	-0.846401	-1.47705	-1.43922	-1.59063	2	___1							0.998699	1.68154e-05	130.56	99.278	130.56	-0.88424	138960000	350	0.583294	0.495719	0.579573	0.260402	-1.12819	-1.26871	0.616342	-0.311011	-0.53381	AT1G11650.2;AT4G27000.1	333;350
AT1G11700	senescence regulator (Protein of unknown function, DUF584);(source:Araport11)	0	0	S	115	1.48805	0.199001	0.850893	0.871077	-2.30157	-2.54939	0.598366	1.09316	1.2949	1.05084	1.22112	-0.650032	-0.751476	0.705484	0.717253	0.565281	0.908125	2	___1							0.992436	1.5047e-20	179.79	157.56	178.14	-0.12165	649860000	115	0.147156	1.64211	1.66406	0.659464	-0.557848	-0.468016	0.720495	0.122037	0.378647	AT1G11700.1	115
AT1G11700	senescence regulator (Protein of unknown function, DUF584);(source:Araport11)	0	0	S	167	0.246181	-2.70319	-2.23786	-3.26756	-3.34523	-3.40602	-0.665892	-4.14993	-0.172999	-0.164894	-0.655844	-1.86024	-2.33543	-0.245955	-4.34898	-2.58732	-1.38313	2	___1							0.999496	0.00431446	68.42	57.514	68.42	1.0875	116980000	167	0.439295	0.901161	0.828116	0.235774	-1.41123	-1.34711	0.531877	0.782539	0.67115	AT1G11700.1	167
AT1G12330	cyclin-dependent kinase-like protein;(source:Araport11)	0	0	S	501	-1.16201	-3.10908	-2.99792	-3.117	-2.00688	-2.84838	-3.11911	-0.501535	-0.739089	-2.52874	-0.780203	-2.58304	-1.57346	-0.595993	-3.88884	-2.81066	-3.33282	2	___1							0.999877	0.00136155	76.228	65.814	73.885	0.022128	68373000	501	0.552451	-0.477526	-0.629126	0.555071	-0.534814	-0.632136	0.284348	0.747603	1.19872	AT1G12330.1	501
AT1G12360	encodes a Sec1 protein and expressed throughout the plant. physically interacts with Syntaxin1 and is required for cytokinesis.	KEULE (KEU)	KEULE (KEU); (SEC11)	S	582	-0.186827	0.168814	-0.155512	0.247936	-3.30264	-3.51336	1.68088	1.46878	1.54261	1.13667	0.792912	1.13336	-0.443989	1.73341	0.198919	0.86821	0.769411	2	___1					+	Col-0_W_5A-1_W	1	3.38166e-21	181.41	159.86	181.41	-1.0695	881400000	582	0.541187	0.935189	0.647646	0.379186	-1.72418	-0.964294	0.0418637	-0.593577	-2.71822	AT1G12360.1	582
AT1G12360	encodes a Sec1 protein and expressed throughout the plant. physically interacts with Syntaxin1 and is required for cytokinesis.	KEULE (KEU)	KEULE (KEU); (SEC11)	S	588	-2.14825	-1.71527	-1.50029	-1.20022	-0.977369	0.00147247	-3.04429	-4.12108	-2.96011	-2.7451	-3.04255	-0.12973	-2.84185	-3.38052	-1.33099	-3.19213	-3.99084	2	___1							0.950861	3.38166e-21	190.27	85.239	190.27	-0.39566	221900000	588	0.696223	0.394309	0.409741	0.955412	0.08205	0.0587694	0.148058	1.19698	1.70947	AT1G12360.1	588
AT1G12460	Leucine-rich repeat protein kinase family protein;(source:Araport11)	0	0	S	668	-0.568132	-0.459332	-3.3337	-1.68853	-0.959085	-1.27774	-0.837843	-0.25465	-0.678451	-0.591703	-0.996681	-0.530115	-0.849518	-0.778032	-0.99947	-0.657713	-0.970173	2	___1							0.999687	2.2615e-09	136.17	116.93	126.48	-0.21343	253910000	668	0.369432	-0.680095	-0.970165	0.687857	-0.113109	-0.425952	0.459712	-0.63664	-0.800571	AT1G12460.2;AT1G12460.1	668;807
AT1G12760	Zinc finger, C3HC4 type (RING finger) family protein;(source:Araport11)	0	0	S	124	2.34973	2.12198	1.60635	1.6202	1.84527	1.35838	0.943684	1.70068	2.28064	2.28428	1.8051	1.91168	2.10446	1.63663	1.98921	2.05917	1.644	3	___1							1	1.81215e-32	188.44	174.55	188.44	0.072425	1604900000	124	0.141603	0.462559	1.69195	0.169562	-0.422254	-1.60426	0.916052	0.0271023	0.110844	AT1G12760.2;AT1G12760.1	124;195
AT1G12930	Ran effector.	(TNPO3)	(TNPO3)	S	625	1.80612	1.07933	1.09836	1.21946	1.32942	1.62736	1.89302	1.91441	1.34601	1.35093	0.749847	1.04315	-3.36762	1.49031	0.721991	1.0841	-3.03676	2	___1							0.993671	2.79756e-39	204.96	183.12	127.76	0.41088	1564800000	625	0.125575	-0.390236	-1.77886	0.19229	1.96911	1.50651	0.187352	1.71104	1.52675	AT1G12930.1	625
AT1G13020	Encodes eIF4B2, eukaryotic initiation factor 4B2.	EUKARYOTIC INITIATION FACTOR 4B2 (EIF4B2)	EUKARYOTIC INITIATION FACTOR 4B2 (EIF4B2)	S	508	1.47011	1.96379	2.23721	2.0152	-0.121859	-0.0258904	1.19683	1.05926	1.0551	1.2916	0.78896	-0.348513	-3.402	0.932413	1.33054	1.16905	0.883984	4	___1	+	Col-0_W_Col-0_D			+	Col-0_W_5A-1_W	0.999317	4.54818e-05	98.062	81.94	74.364	-0.073293	1856100000	508	0.0109886	1.39449	3.62821	0.25902	1.46645	1.27292	0.0155137	0.793717	3.60181	AT1G13020.1	508
AT1G13020	Encodes eIF4B2, eukaryotic initiation factor 4B2.	EUKARYOTIC INITIATION FACTOR 4B2 (EIF4B2)	EUKARYOTIC INITIATION FACTOR 4B2 (EIF4B2)	S	191	-3.21665	-2.99966	-2.44739	-1.76785	1.96201	1.68852	-0.217749	-3.66182	-2.53648	-2.83019	-3.3446	-2.44381	-4.13016	-3.1669	-3.30692	-3.03708	-3.55853	3	___1							0.975225	2.78594e-05	58.476	49.862	58.476	0.15463	326250000	191	0.104704	-2.55063	-1.91002	0.100586	3.1897	2.01047	0.146092	0.692952	1.71984	AT1G13020.1	191
AT1G13030	Encodes a plant coilin, a protein that in other organisms is a major structural scaffolding protein necessary for Cajal body formation, composition and activity. It has been shown to bind both U1 and U1 snRNAs in vitro.	COILIN (COILIN)	COILIN (COILIN); (ATCOILIN)	S	187	-3.53347	-0.0895958	-0.145748	-0.171824	-0.0609722	-0.125334	-2.63989	-4.06929	-0.307521	-2.69975	0.166376	-3.10139	-3.67482	-0.104637	0.229191	-0.159798	0.476433	3	___1							0.999978	2.82058e-42	206.03	180.81	206.03	1.6046	1998700000	187	0.590868	0.738713	0.567644	0.717775	0.569745	0.38255	0.303124	-1.1671	-1.14743	AT1G13030.1	187
AT1G13030	Encodes a plant coilin, a protein that in other organisms is a major structural scaffolding protein necessary for Cajal body formation, composition and activity. It has been shown to bind both U1 and U1 snRNAs in vitro.	COILIN (COILIN)	COILIN (COILIN); (ATCOILIN)	S	321	0.747049	-0.965851	-2.96307	0.953648	1.11227	0.258764	1.41823	1.65905	0.291656	0.169207	0.866135	1.11944	1.02971	1.56721	0.543037	0.800833	0.807116	4	___1							1	3.30337e-71	226.07	221.26	226.07	0.39693	1730100000	321	0.132763	-1.66913	-1.73862	0.756902	-0.12671	-0.327017	0.290908	-1.27405	-1.18047	AT1G13030.1	321
AT1G13170	OSBP(oxysterol binding protein)-related protein 1D;(source:Araport11)	OSBP(OXYSTEROL BINDING PROTEIN)-RELATED PROTEIN 1D (ORP1D)	OSBP(OXYSTEROL BINDING PROTEIN)-RELATED PROTEIN 1D (ORP1D)	S	236	-1.20918	-0.545055	-1.01312	-0.673349	-1.49515	-1.3262	-1.15945	-1.03915	-0.619067	-0.563618	-0.34129	-3.99591	-2.83002	-3.26383	-0.481968	-0.754473	-1.00224	2	___1			+	Col-0_D_ost1_D			1	8.47726e-05	92.264	76.125	92.264	-0.45912	209120000	236	0.0732373	0.39481	2.16826	0.00101554	2.10827	6.84578	0.626581	-0.113949	-0.51796	AT1G13170.1;AT1G13170.2	236;236
AT1G13190	RNA-binding (RRM/RBD/RNP motifs) family protein;(source:Araport11)	0	0	S	534	-0.289665	-0.263821	-0.415567	-0.779373	-3.93752	-0.21283	-0.704826	-0.885508	-0.561429	-0.361906	-1.21426	-0.438639	-0.123631	-0.222479	-1.07666	-0.873362	-1.11521	2	___1					+	Col-0_W_5A-1_W	1	4.42627e-08	127.75	109.01	117.4	-1.0953	540140000	534	0.287079	0.998065	1.16809	0.295209	-1.17359	-1.1687	0.0126595	0.58464	3.7976	AT1G13190.1	534
AT1G13360	hypothetical protein;(source:Araport11)	0	0	S	31	-0.48716	-1.49247	-0.852404	-1.5063	-3.59122	-2.55046	-1.1109	-0.276648	-0.674951	-0.15069	-0.172117	-0.894686	-1.25602	-0.861959	-1.44754	-1.65585	-0.616344	2	___1							1	4.94625e-28	216.99	197.31	216.99	0.41923	295010000	31	0.345717	0.797721	1.02312	0.364106	-0.878085	-0.99798	0.712636	0.155326	0.389943	AT1G13360.3;AT1G13360.2;AT1G13360.1	31;31;31
AT1G13440	The expression level of GAPC-2 is upregulated in Arabidopsis seedlings exposed to cadmium.	GLYCERALDEHYDE-3-PHOSPHATE DEHYDROGENASE C2 (GAPC2)	GLYCERALDEHYDE-3-PHOSPHATE DEHYDROGENASE C-2 (GAPC-2);GLYCERALDEHYDE-3-PHOSPHATE DEHYDROGENASE C2 (GAPC2)	S	207	1.21463	1.19581	1.3157	1.02274	1.36804	0.693613	1.97458	1.62355	1.3124	1.03106	1.70752	2.81828	2.24086	1.02631	1.35892	1.13451	1.50887	2	___1							1	9.89774e-10	139.66	118.43	133.25	0.097882	1235400000	207	0.443118	-0.227728	-0.820845	0.311939	-0.613537	-1.12432	0.261312	-0.146879	-1.26594	AT1G13440.1;AT1G13440.2;AT3G04120.1	207;179;207
AT1G13440	The expression level of GAPC-2 is upregulated in Arabidopsis seedlings exposed to cadmium.	GLYCERALDEHYDE-3-PHOSPHATE DEHYDROGENASE C2 (GAPC2)	GLYCERALDEHYDE-3-PHOSPHATE DEHYDROGENASE C-2 (GAPC-2);GLYCERALDEHYDE-3-PHOSPHATE DEHYDROGENASE C2 (GAPC2)	S	236	-2.58635	-3.50722	-2.52921	-3.45569	-1.17171	-2.50798	-0.429356	-3.73302	-0.669608	-1.56402	-3.99405	-0.340441	-2.98572	-0.561199	-0.691673	-0.516655	-0.089098	3	___1					+	Col-0_W_5A-1_W	0.860026	1.11592e-05	92.833	67.812	92.833	-0.45592	144470000	236	0.222342	-1.0591	-1.36123	0.57806	-0.664729	-0.594494	0.000710094	-2.58714	-7.3978	AT1G13440.1;AT1G13440.2;AT3G04120.1	236;208;236
AT1G13650	hypothetical protein;(source:Araport11)	0	0	S	73	0.109236	-2.46694	-2.42103	-3.28242	-1.25123	-0.40243	-4.20723	1.34434	1.60108	1.22674	1.69543	-3.24617	-0.585449	-3.10526	0.722672	0.588657	1.16682	3	___1					+	Col-0_W_5A-1_W	0.98958	1.22311e-65	261.31	240.08	118.32	0.0036703	482880000	73	0.542554	-0.886154	-0.645385	0.479975	1.18316	0.762851	0.0234467	-2.84134	-3.22073	AT1G13650.4;AT1G13650.3;AT1G13650.2;AT1G13650.1	73;73;78;78
AT1G13650	hypothetical protein;(source:Araport11)	0	0	S	170	1.2971	1.46261	0.791517	0.98904	-3.46631	-2.949	0.149807	-2.94576	2.2789	-2.80008	-4.05006	-3.82202	-3.14507	-3.01154	-2.57222	1.25473	1.62465	2	___1	+	Col-0_W_Col-0_D					0.795023	3.45538e-55	233.1	192.01	195.09	-2.011	677080000	170	0.00641959	3.43788	4.09134	0.35322	1.02339	1.02302	0.405213	1.03268	0.908628	AT1G13650.4;AT1G13650.3;AT1G13650.2;AT1G13650.1	170;170;175;175
AT1G13650	hypothetical protein;(source:Araport11)	0	0	S	171	1.96431	2.0876	-2.87543	1.93675	-2.82089	-3.36615	0.263889	2.71383	3.22528	3.23721	3.32016	-1.74376	-3.62842	1.8237	1.67463	-2.06515	2.54058	3	___1							0.917425	6.21296e-25	172.83	140.55	95.654	-0.76519	1306100000	171	0.430364	1.58064	0.845285	0.866242	0.380497	0.177286	0.974911	0.0616248	0.0330527	AT1G13650.4;AT1G13650.3;AT1G13650.2;AT1G13650.1	171;171;176;176
AT1G13930	Involved in response to salt stress. Knockout mutants are hypersensitive to salt stress. The mRNA is cell-to-cell mobile.	0	0	S	71	-1.05882	-3.11735	-3.39972	-3.29037	2.7416	3.79967	1.42712	-0.509987	-1.44112	-1.59827	-1.75898	-0.343475	2.27121	-1.09937	-3.22691	-1.78475	-1.39211	2	___1	+	Col-0_W_Col-0_D					1	3.88421e-13	152	127.31	152	-0.083934	1067800000	71	0.00547575	-4.58116	-4.23403	0.305386	1.58848	1.14145	0.502726	-0.581974	-0.721843	AT1G13930.3;AT1G13930.2;AT1G13930.1	71;71;71
AT1G13980	Encodes a GDP/GTP exchange factor for small G-proteins of the ADP ribosylation factor (RAF) class, and as regulator of intracellular trafficking. Homologous to Sec7p and YEC2 from yeast. Involved in the specification of apical-basal pattern formation. Essential for cell division, expansion and adhesion. It appears that heteotypic binding between the DCB and C-terminal domains of two GNOM proteins…	GNOM (GN)	GNOM (GN);VASCULAR NETWORK 7 (VAN7);EMBRYO DEFECTIVE 30 (EMB30);MIZU-KUSSEL2 (MIZ2); (112A-2A); (GNOM)	S	961	-1.84335	-3.11377	-1.92327	-0.926605	-1.58385	-3.74865	-2.04882	-1.50813	-1.26865	-1.0695	-1.15389	-2.83949	-3.85879	-3.75421	-1.67616	-2.23718	-2.83524	2	___1							0.996451	0.000130898	90.412	63.314	76.262	0.33253	96398000	961	0.707937	0.270616	0.392951	0.120554	1.2618	1.86909	0.64073	0.297779	0.496296	AT1G13980.2;AT1G13980.1	961;961
AT1G14000	Encodes a protein with similarity to members of the C1 subgroup of MAP kinase kinase kinases. Interacts physically with the receptor kinase BRL2/VH1 and appears to be involved in auxin and brassinosteriod signaling. The mRNA is cell-to-cell mobile.	VH1-INTERACTING KINASE (VIK)	VH1-INTERACTING KINASE (VIK); (ILK6)	S	23	2.05849	-1.99939	1.06417	1.22426	1.70759	-2.74703	-3.56778	-3.2699	2.44201	-2.591	-3.15675	1.28971	2.16781	-3.58775	2.1958	1.20851	-3.64647	3	___1							0.829817	7.20108e-07	84.962	77.25	84.962	-0.0065082	844680000	23	0.144433	2.55616	1.67761	0.400013	-1.92587	-0.919517	0.73169	0.667605	0.362652	AT1G14000.1	23
AT1G14280	Encodes phytochrome kinase substrate 2. PKS proteins are critical for hypocotyl phototropism. Forms a complex with Phot1, Phot2 and NPH3.	PHYTOCHROME KINASE SUBSTRATE 2 (PKS2)	PHYTOCHROME KINASE SUBSTRATE 2 (PKS2)	S	354	-1.27891	-2.60993	-2.30745	-1.7005	-3.5629	-2.51663	-2.14864	-2.4157	-1.16412	-0.823534	-1.14365	-2.96712	-3.90358	-2.86931	-3.48847	-3.35627	-2.8681	2	___1					+	Col-0_W_5A-1_W	1	0.0243793	68.893	40.381	68.893	-0.55432	46261000	354	0.162281	0.686769	1.59294	0.258368	0.585702	1.27492	0.0224366	1.26341	3.26036	AT1G14280.1	354
AT1G14280	Encodes phytochrome kinase substrate 2. PKS proteins are critical for hypocotyl phototropism. Forms a complex with Phot1, Phot2 and NPH3.	PHYTOCHROME KINASE SUBSTRATE 2 (PKS2)	PHYTOCHROME KINASE SUBSTRATE 2 (PKS2)	S	239	-1.1693	-2.92025	-2.88544	-1.43271	-2.70172	-2.79223	-2.9673	-2.61171	-0.607589	-0.944677	-0.56072	-3.07952	-3.77773	-2.26263	-1.53092	-1.1438	-0.805479	2	___1							1	9.43309e-07	124.12	108.58	83.729	-0.70087	131050000	239	0.20751	0.666316	1.4125	0.503514	0.271719	0.720446	0.164202	-0.941859	-1.62919	AT1G14280.1	239
AT1G14280	Encodes phytochrome kinase substrate 2. PKS proteins are critical for hypocotyl phototropism. Forms a complex with Phot1, Phot2 and NPH3.	PHYTOCHROME KINASE SUBSTRATE 2 (PKS2)	PHYTOCHROME KINASE SUBSTRATE 2 (PKS2)	S	245	-1.66431	-0.531347	-2.77485	-2.43753	-3.88288	-2.35682	-3.3461	-2.32595	-0.506019	-0.635954	-0.615784	-3.08497	-3.73777	-2.71351	-3.22782	-0.656887	-2.57435	2	___1							1	1.22159e-08	132.47	109.1	83.729	-0.70087	125840000	245	0.123374	1.12593	1.79163	0.71441	0.200806	0.387388	0.74451	0.301007	0.344468	AT1G14280.1	245
AT1G14640	SWAP (Suppressor-of-White-APricot)/surp domain-containing protein;(source:Araport11)	0	0	S	510	-3.29115	-3.25115	-3.58152	-2.64493	0.60108	0.635292	-2.37295	-3.2934	-3.10504	-2.6151	-3.69253	-1.98761	-1.10723	-3.25932	-2.39308	-4.02331	-2.7507	2	___1							0.898353	4.44832e-06	111.74	73.719	111.74	0.29254	139530000	510	0.0900922	-2.08469	-2.01846	0.474859	1.01056	0.772263	NaN	0	NaN	AT1G14640.2;AT1G14640.1;AT1G14650.3;AT1G14650.2;AT1G14650.1	499;499;510;510;510
AT1G14650	SWAP (Suppressor-of-White-APricot)/surp domain-containing protein / ubiquitin family protein;(source:Araport11)	0	0	S	259	-2.08901	-2.30948	-2.43697	-2.91718	-3.30189	-3.22377	-2.98775	-1.80968	-1.39274	-2.01581	-1.9748	-2.6352	-3.22925	-1.78176	-2.67323	-2.86759	-2.43708	2	___1							0.999998	0.000535427	86.772	64.298	86.772	-0.061265	37152000	259	0.351267	0.392613	1.01048	0.623983	-0.282035	-0.521968	0.384046	0.221141	0.953672	AT1G14650.3;AT1G14650.2;AT1G14650.1	259;259;259
AT1G14710	hydroxyproline-rich glycoprotein family protein;(source:Araport11)	0	0	S	465	-0.169722	-0.0807362	-3.28606	0.224127	-2.34603	0.633993	-0.42942	-0.034277	-0.0823526	-3.22375	-3.16442	-0.335535	0.56358	-0.0346127	-0.87196	-0.971487	-0.420544	3	___1							0.778926	2.12676e-09	129.2	102.83	104.81	0.67257	343950000	465	0.794369	-0.284163	-0.272505	0.475126	-0.608411	-0.77177	0.943452	-0.073433	-0.0745651	AT1G14710.2;AT1G14710.1	465;465
AT1G15230	hypothetical protein;(source:Araport11)	0	0	S	138	-0.162992	-0.286507	-0.465263	0.678663	0.391972	-0.145128	1.13491	0.761761	0.313117	-2.61902	0.342709	0.0748596	0.456184	0.316484	0.14653	0.676552	0.377127	3	___1							1	1.58424e-09	131.26	114.95	108.88	-0.52602	852030000	138	0.161477	-0.594903	-1.59656	0.485016	0.253368	0.753647	0.218538	-0.459094	-1.40666	AT1G15230.1	138
AT1G15280	CASC3/Barentsz eIF4AIII binding protein;(source:Araport11)	(BTZ2)	(BTZ2)	S	10	1.45408	0.336281	0.442387	0.488314	0.905264	1.6391	0.866999	1.59648	0.903195	1.05929	1.23793	0.904949	1.02262	0.920942	0.893639	0.534595	0.80971	2	___1							1	2.06822e-54	260.49	235.93	260.49	-0.95613	1368000000	10	0.138875	-0.571698	-1.70605	0.28412	0.302459	1.19936	0.845678	-0.0657167	-0.204971	AT1G15280.1;AT1G15280.2	10;10
AT1G15280	CASC3/Barentsz eIF4AIII binding protein;(source:Araport11)	(BTZ2)	(BTZ2)	S	380	-2.97476	-2.34763	-3.07144	-2.59768	-0.851341	-0.596481	-2.88617	-3.72355	-2.2707	-3.31925	-2.02934	-3.14718	-3.85238	-2.88225	-2.94419	-2.5317	-3.22728	3	___1							0.913627	0.0051633	57.145	36.889	55.061	-0.2849	54491000	380	0.385824	-0.733492	-0.935106	0.230875	1.27955	1.36361	NaN	0	NaN	AT1G15280.1;AT1G15280.2	380;381
AT1G15290	Encodes REDUCED CHLOROPLAST COVERAGE 3 (REC3). Contributes to establishing the size of the chloroplast compartment.	REDUCED CHLOROPLAST COVERAGE 3 (REC3)	REDUCED CHLOROPLAST COVERAGE 3 (REC3)	S	1106	-2.72252	-1.91114	-1.05673	-0.228661	-1.45311	-3.48581	-3.78221	-0.700457	-0.0625792	-3.24025	0.214502	-3.18947	-3.0744	-0.442345	-3.78609	-0.592865	-0.419756	2	___1							0.857666	2.31361e-57	245.66	212.93	245.66	0.9298	247460000	1106	0.381967	0.875636	0.943248	0.922176	-0.119992	-0.102722	0.918627	0.119809	0.107427	AT1G15290.1;AT1G15290.2	1106;1106
AT1G15340	Protein containing methyl-CpG-binding domain.Has sequence similarity to human MBD proteins.	METHYL-CPG-BINDING DOMAIN 10 (MBD10)	METHYL-CPG-BINDING DOMAIN 10 (MBD10)	S	228	-3.0482	-3.1427	-3.18558	-2.40148	-1.09453	-2.71967	-3.58453	-3.00108	-3.72565	-2.61756	-3.72132	-0.337515	-0.869076	-1.41185	-3.57155	-2.47153	-3.06476	3	___1							1	9.23415e-05	90.884	73.806	90.884	0.18919	60375000	228	0.563529	-0.344538	-0.611138	0.0523984	-1.72714	-2.53206	0.800486	0.0914535	0.266513	AT1G15340.1;AT1G15340.2	228;176
AT1G15340	Protein containing methyl-CpG-binding domain.Has sequence similarity to human MBD proteins.	METHYL-CPG-BINDING DOMAIN 10 (MBD10)	METHYL-CPG-BINDING DOMAIN 10 (MBD10)	S	383	0.82988	-2.41405	-3.2605	-0.325691	-1.43136	-1.21602	0.862022	1.66655	0.837729	0.273369	1.06615	0.636585	0.64909	1.16479	-0.289848	-0.3382	0.165995	2	___1							0.999959	4.80036e-88	304.9	285.65	288.82	-0.64579	768130000	383	0.33741	-1.26289	-1.04236	0.398852	-0.846524	-0.921962	0.355438	-1.13857	-1.01787	AT1G15340.1;AT1G15340.2	383;331
AT1G15400	Tightly connected with MAPK signaling to fine-tune stomatal production and patterning.	MAPK SUBSTRATES IN THE STOMATAL LINEAGE 2 (MASS2)	MAPK SUBSTRATES IN THE STOMATAL LINEAGE 2 (MASS2)	S	16	-3.089	1.29343	0.957998	-2.98138	0.627422	-0.691124	1.48409	-4.43416	0.704862	1.17888	-0.447479	1.6822	0.421331	1.58508	0.528849	0.859001	0.0521355	2	___1							0.972331	0.00202209	72.496	53.716	68.034	0.87373	734670000	16	0.913446	-0.201294	-0.113356	0.26543	-1.98298	-1.25354	0.363967	-1.43473	-0.998295	AT1G15400.2;AT1G15400.1;AT1G15400.3	16;16;16
AT1G15400	Tightly connected with MAPK signaling to fine-tune stomatal production and patterning.	MAPK SUBSTRATES IN THE STOMATAL LINEAGE 2 (MASS2)	MAPK SUBSTRATES IN THE STOMATAL LINEAGE 2 (MASS2)	S	107	1.33465	1.18077	0.875891	0.319475	1.31505	1.82792	1.29636	1.22336	1.10582	1.70302	0.727242	1.78234	1.43881	1.21519	0.327627	0.772606	0.271801	2	___1							1	1.51862e-09	132.97	102.8	47.621	-0.57319	2951200000	107	0.113556	-0.487976	-1.85148	0.780464	-0.0631061	-0.294149	0.173375	0.470352	1.587	AT1G15400.2;AT1G15400.1;AT1G15400.3	107;107;107
AT1G15440	Encodes a nucleolar protein that is a ribosome biogenesis co-factor. Mutants display aberrant RNA processing and female gametophyte development.	PERIODIC TRYPTOPHAN PROTEIN 2 (PWP2)	PERIODIC TRYPTOPHAN PROTEIN 2 (ATPWP2);PERIODIC TRYPTOPHAN PROTEIN 2 (PWP2)	S	235	-1.44675	-1.40728	-1.27131	-1.1729	-0.964176	-2.32937	-1.11308	-3.64274	-2.88034	-3.54896	-3.47385	-0.273235	-3.70226	-1.23965	-0.730085	-0.400349	-3.3739	2	___1							1	2.73902e-14	149.3	135.39	149.3	0.31545	162730000	235	0.314547	0.68778	1.09739	0.817852	-0.27396	-0.242738	0.831876	0.176881	0.223656	AT1G15440.2;AT1G15440.1	235;275
AT1G15440	Encodes a nucleolar protein that is a ribosome biogenesis co-factor. Mutants display aberrant RNA processing and female gametophyte development.	PERIODIC TRYPTOPHAN PROTEIN 2 (PWP2)	PERIODIC TRYPTOPHAN PROTEIN 2 (ATPWP2);PERIODIC TRYPTOPHAN PROTEIN 2 (PWP2)	S	653	-0.630331	-3.14994	-2.33479	-4.3508	-1.09844	-1.05676	0.210112	-0.314098	-0.24912	-3.32838	0.338743	-0.477547	-1.00239	-0.172972	-0.853897	-0.387278	0.290356	2	___1							1	7.48064e-18	155.86	140.1	155.86	-2.5969	567670000	653	0.0506927	-2.05167	-2.43678	0.975255	-0.013828	-0.0325998	0.062898	-2.29953	-2.38342	AT1G15440.2;AT1G15440.1	653;693
AT1G15750	Encodes a protein with several WD40 repeats at the C-terminus and predicted protein-protein interaction domains at the N-terminus. Together with the TOPLESS-RELATED PROTEINS (TPRs), it is thought to be involved in transcriptional repression of root-promoting genes in the top half of the embryo during the transition stage of embryogenesis. It can also interact with IAA12 through the EAR domain of …	TOPLESS (TPL)	WUS-INTERACTING PROTEIN 1 (WSIP1);TOPLESS (TPL)	S	214	4.27808	4.19849	4.07046	4.16046	-1.91731	2.16648	-3.49349	4.42533	4.71935	4.69975	4.75403	-3.45526	3.57215	-2.73954	-4.11549	-2.34287	-3.77354	2	___1					+	Col-0_W_5A-1_W	1	6.213e-32	228.76	194.79	199.15	-0.0053177	4613700000	214	0.0771506	3.88162	2.13055	0.69875	1.16946	0.410047	1.44924e-05	7.58751	16.5991	AT1G15750.4;AT1G15750.3;AT1G15750.2;AT1G15750.1	214;214;214;214
AT1G15750	Encodes a protein with several WD40 repeats at the C-terminus and predicted protein-protein interaction domains at the N-terminus. Together with the TOPLESS-RELATED PROTEINS (TPRs), it is thought to be involved in transcriptional repression of root-promoting genes in the top half of the embryo during the transition stage of embryogenesis. It can also interact with IAA12 through the EAR domain of …	TOPLESS (TPL)	WUS-INTERACTING PROTEIN 1 (WSIP1);TOPLESS (TPL)	S	705	2.32642	-2.26198	-2.04842	2.27763	-0.996346	-1.3383	2.07802	2.18132	2.50396	2.27607	2.58158	0.752039	-0.149971	2.18109	1.90607	-3.28683	2.89133	3	___1							0.929549	1.43218e-42	210.73	201.47	188.73	-0.27277	1294900000	705	0.80767	-0.407758	-0.254416	0.738309	-0.446546	-0.353247	0.853459	-0.43011	-0.194475	AT1G15750.4;AT1G15750.3;AT1G15750.2;AT1G15750.1	705;705;705;705
AT1G15930	Ribosomal protein L7Ae/L30e/S12e/Gadd45 family protein;(source:Araport11)	RIBOSOMAL PROTEIN ES12Z (ES12Z)	RIBOSOMAL PROTEIN ES12Z (ES12Z)	S	2	-0.522854	0.459633	0.412251	1.91405	0.414211	1.16915	0.277878	-3.5466	-2.9029	-1.89748	-2.81528	1.86157	-2.45883	-3.24884	0.881144	1.99152	-0.0189686	3	___1							1	1.72869e-08	83.815	78.603	83.815	-0.93825	1941600000	2	0.432447	0.98711	0.841256	0.657457	0.860691	0.471025	0.637395	-0.385461	-0.501379	AT1G15930.2;AT1G15930.1	2;2
AT1G15940	One of 5 PO76/PDS5 cohesion cofactor orthologs of Arabidopsis.	(PDS5E)	(ATPDS5E); (PDS5E)	S	281	-0.143127	-0.540487	-0.872488	-0.972773	-2.1414	-2.48042	-2.07364	0.78392	-0.290505	-0.62924	-0.280069	0.14023	-3.04554	0.316484	-0.971727	-0.482092	-0.739182	3	___1							0.999994	1.75673e-06	94.08	74.325	73.361	0.40414	268420000	281	0.321021	0.845666	1.08148	0.65159	-0.614944	-0.479849	0.71046	0.0987814	0.393081	AT1G15940.1	281
AT1G15940	One of 5 PO76/PDS5 cohesion cofactor orthologs of Arabidopsis.	(PDS5E)	(ATPDS5E); (PDS5E)	S	290	0.381514	-0.439995	-0.277668	-1.14553	-1.97146	-1.61952	-0.245956	0.682711	0.0270586	0.276403	0.33849	-0.3873	-3.34532	0.295362	-0.235458	0.00183105	-0.164885	2	___1							0.958088	7.77857e-07	118.97	94.038	104.66	-0.21524	362750000	290	0.567224	0.418137	0.605187	0.775244	0.357196	0.301396	0.554845	-0.237584	-0.632511	AT1G15940.1	290
AT1G15940	One of 5 PO76/PDS5 cohesion cofactor orthologs of Arabidopsis.	(PDS5E)	(ATPDS5E); (PDS5E)	S	836	1.70564	1.32196	0.974577	0.771961	1.61909	0.196198	0.464222	0.736067	1.32568	1.205	0.839691	1.57561	1.72878	2.22388	0.599762	1.28555	-0.226547	3	___1			+	Col-0_D_ost1_D			1	3.70906e-13	131.13	105.85	115.66	-1.6912	1011900000	836	0.280357	0.439643	1.18627	0.0417658	-1.08886	-2.72018	0.2042	0.640613	1.45968	AT1G15940.1	836
AT1G16270	kinase superfamily with octicosapeptide/Phox/Bem1p domain-containing protein;(source:Araport11)	B4 RAF-LIKE PROTEIN KINASE (B4)	B4 RAF-LIKE PROTEIN KINASE (B4)	S	611	-1.47334	-0.0593243	0.24238	0.113058	-2.54942	-3.8869	-3.65403	-1.70322	-4.17629	-2.95173	-2.43323	0.0088501	-4.84889	0.0837708	-2.85477	-0.391941	-3.36225	3	___1	+	Col-0_W_Col-0_D					0.750121	0.000263103	56.648	47.189	56.648	0.60615	205180000	611	0.00623878	2.65409	4.11677	0.402711	-1.36297	-0.913853	0.087507	1.90868	2.11999	AT1G16270.3;AT1G16270.2;AT1G16270.1	611;611;611
AT5G55910	Member of AGC VIIIa Kinase family. D6PK is a protein kinase involved that plays a role in polar auxin transport. Most likely acts redundantly with the related proteins: D6PKL1,D6PKL2,and D6PKL3. PIN1 is a target of D6PK phosphorylation. D6PK is associated with sterol enriched membrane rafts and may be involved in regulation of the switch from basal to planar polarity during root hair initiation. …	D6 PROTEIN KINASE (D6PK)	AGC VIIIA KINASE 1-1 (AGC1-1);D6 PROTEIN KINASE (D6PK)	S	345	0.323059	0.704792	0.66436	0.618509	-1.31899	-1.50607	-0.435566	0.294287	0.657392	-3.00207	1.20605	-0.651068	-3.39355	-3.00078	0.572195	1.42851	1.05562	3	___1	+	Col-0_W_Col-0_D					0.974433	2.29953e-20	164.01	134.91	89.028	-1.3652	629610000	345	0.0211428	1.31927	3.09902	0.12393	1.60688	1.84761	0.114908	-0.441096	-1.90645	AT5G55910.2;AT5G55910.1;AT1G16440.1;AT4G26610.1;AT3G27580.2;AT3G27580.1;AT5G47750.1;AT2G44830.3;AT2G44830.2;AT2G44830.1	345;345;335;355;415;415;426;596;596;596
AT1G16520	NAI1 interacting protein, involved in ER body and vesicle formation.	NAI2-INTERACTING PROTEIN 2 (NAIP2)	NAI2-INTERACTING PROTEIN 2 (NAIP2)	S	245	0.550432	-2.7952	0.423195	-2.32574	-3.76778	0.324562	0.747633	0.728405	-3.59966	0.367422	0.734388	1.09954	1.02648	0.874989	-1.35551	-3.20627	0.782921	3	___1							0.999718	8.866e-15	150.98	121.05	118.37	0.625	676820000	245	0.71226	-0.545033	-0.386786	0.302453	-1.49213	-1.14922	0.881776	0.222789	0.15648	AT1G16520.1	245
AT1G16520	NAI1 interacting protein, involved in ER body and vesicle formation.	NAI2-INTERACTING PROTEIN 2 (NAIP2)	NAI2-INTERACTING PROTEIN 2 (NAIP2)	S	208	-1.18891	-3.39409	-1.28954	-1.75841	-2.07491	-1.23123	-4.01486	-3.04946	-1.05357	-2.75757	-1.68127	-3.92316	-1.23708	-2.25971	-2.69983	-2.82706	-3.60206	2	___1							0.993672	0.000816876	107.06	25.723	78.692	1.08	115110000	208	0.419119	0.684878	0.867276	0.906699	-0.119299	-0.123264	0.140535	1.13524	1.74993	AT1G16520.1	208
AT1G16610	Encodes SR45, a member of the highly conserved family of serine/arginine-rich (SR) proteins, which play key roles in pre-mRNA splicing and other aspects of RNA metabolism. SR45 is a spliceosome protein, interacts with SR33 and the U1-70K protein of the U1 snRNP. Also involved in plant sugar response. sr45-1 mutation confers hypersensitivity to ABA and glucose during early seedling growth. Phospho…	ARGININE/SERINE-RICH 45 (SR45)	(ATSR45);ARGININE/SERINE-RICH 45 (SR45)	S	183	3.03516	2.46279	2.33308	1.78216	1.9552	2.21245	2.64879	2.42515	2.78502	3.27132	1.85782	2.93506	2.52226	3.0818	1.92595	2.18182	1.67033	2	___1							0.994298	9.96452e-06	111.31	82.586	105.95	-0.098226	2419000000	183	0.764857	0.0929012	0.313025	0.0625382	-0.535979	-2.38805	0.205868	0.477261	1.45333	AT1G16610.4;AT1G16610.5;AT1G16610.7;AT1G16610.6;AT1G16610.2;AT1G16610.1;AT1G16610.3	183;183;183;183;183;183;183
AT1G16670	Encodes a cold-activated plasma membrane protein cold-responsive protein kinase that phosphorylates 14-3-3 proteins. The phosphorylated 14-3-3 proteins shuttle from the cytosol to the nucleus, where they interact with and destabilize the key cold-responsive C-repeat-binding factor (CBF) proteins, modulate CBF stability and the response to cold stress.	COLD-RESPONSIVE PROTEIN KINASE 1 (CRPK1)	COLD-RESPONSIVE PROTEIN KINASE 1 (CRPK1)	S	134	-0.610676	-1.67382	-1.55428	-1.66122	-0.533415	-0.75458	-3.04865	-0.670116	-0.867883	-1.0018	-0.480238	1.17911	0.269423	-3.76903	-0.762814	-1.09657	-1.32857	2	___1							1	3.98106e-05	110.08	87.058	110.08	-0.016719	246800000	134	0.85646	-0.12331	-0.188818	0.756109	-0.478192	-0.32813	0.391046	-0.31235	-0.938561	AT1G16670.1	134
AT1G16720	Encodes HCF173, a protein with weak similarities to the superfamily of the short-chain dehydrogenases/reductases. HCF173 is involved in the initiation of translation of the psbA mRNA and binds a specific site in the 5' UTR of psbA mRNA. Mutants shows a high chlorophyll fluorescence phenotype (hcf) and are severely affected in the accumulation of PSII subunits. The protein HCF173 is localized in t…	0	0	S	95	-1.50324	-2.77634	-2.87953	-3.18254	-2.84302	-3.16106	-3.60619	-2.50827	-0.87741	-0.883461	-0.758984	-2.20391	-3.36994	-2.2799	-1.07169	-3.74472	-2.37805	3	___1							0.796369	0.0038539	58.877	46.214	58.877	1.1908	47628000	95	0.35009	0.444221	1.01315	0.371319	-0.411715	-0.981728	0.819953	-0.187261	-0.239873	AT1G16720.3;AT1G16720.1;AT1G16720.2	95;95;95
AT1G16780	Encodes a type II H+-PPases that localizes to and function as a proton pump of the Golgi apparatus in most tissues except for mature leaves.	(VHP2;2)	(VHP2;2); (AtVHP2;2)	S	148	-2.94166	-2.02272	-2.21225	-2.46142	-2.36864	-4.20215	-1.84497	-3.32631	-2.53674	-3.02694	-2.76396	-1.30992	-3.51559	-2.73495	-3.26354	-3.23208	-3.26356	2	___1					+	Col-0_W_5A-1_W	0.998754	0.00830277	62.823	33.35	62.823	-0.49286	56644000	148	0.382585	0.526007	0.94194	0.634185	-0.415367	-0.506283	0.0158222	0.843547	3.58315	AT1G16780.3;AT1G16780.2;AT1G16780.1	148;148;148
AT1G16850	transmembrane protein;(source:Araport11)	0	0	S	139	-2.68814	-2.92692	-3.49671	-3.59225	1.78624	1.71651	1.86289	-0.255709	-3.67834	-2.8661	-4.04977	-0.238724	2.42063	-1.08389	-3.60085	-3.80474	-2.96096	2	___1	+	Col-0_W_Col-0_D					0.933251	1.09676e-40	220.1	200.26	220.1	-0.067295	528850000	139	0.000203819	-4.45349	-7.99749	0.433652	0.911479	0.850942	NaN	0	NaN	AT1G16850.1	139
AT1G16860	Plasma membrane-localized proteins that negatively regulate cellulose synthesis by inhibiting the exocytosis of CESAs.	(SHOU4L)	(SHOU4L)	S	169	-0.642046	-1.84696	-2.3723	-0.498802	-3.54252	-1.31941	-1.33157	-0.223417	-0.240161	0.505123	-1.04781	-1.89514	-2.5265	-3.4536	-3.2759	-3.20318	-1.85359	2	___1							0.999999	5.43579e-05	123.42	103.09	123.42	0.67563	416670000	169	0.761995	0.264204	0.316985	0.311374	1.02085	1.12578	0.0833108	1.43753	2.15882	AT1G16860.1	169
AT1G16860	Plasma membrane-localized proteins that negatively regulate cellulose synthesis by inhibiting the exocytosis of CESAs.	(SHOU4L)	(SHOU4L)	S	137	0.488914	0.0923023	-0.0830994	-3.4017	0.168915	-3.61693	0.673967	1.09965	-2.56309	-3.71829	-3.60519	-3.07869	0.402706	0.661804	-2.56652	-0.0209389	0.828308	3	___1							0.834351	1.10078e-08	89.751	63.308	62.839	0.94159	396100000	137	0.834475	-0.307296	-0.21824	0.882886	0.252791	0.154998	0.92254	-0.139513	-0.10224	AT1G16860.1	137
AT1G16860	Plasma membrane-localized proteins that negatively regulate cellulose synthesis by inhibiting the exocytosis of CESAs.	(SHOU4L)	(SHOU4L)	S	64	-1.44437	-1.40117	-1.51094	-2.25931	-3.06154	-2.77958	-2.10345	-2.36017	-1.60697	-0.598667	-1.87228	-2.53457	-2.2741	-2.09201	-4.35863	-3.40407	-2.28243	2	___1	+	Col-0_W_Col-0_D			+	Col-0_W_5A-1_W	0.999999	0.00926251	64.439	55.246	64.439	-0.059759	88471000	64	0.0203254	0.922236	3.12997	0.360947	-0.275959	-1.00518	0.0285972	1.69443	3.04469	AT1G16860.1	64
AT1G16860	Plasma membrane-localized proteins that negatively regulate cellulose synthesis by inhibiting the exocytosis of CESAs.	(SHOU4L)	(SHOU4L)	S	76	-1.93994	-2.00063	-2.15819	-3.75601	-1.70508	-1.83092	-2.242	-1.01042	-1.86397	-0.687923	-2.41152	-3.42547	-2.55517	-1.77654	-2.28234	-2.59036	-2.02303	2	___1							0.978132	8.72672e-30	187.39	175.19	187.39	-0.80229	473150000	76	0.178491	-0.766585	-1.5234	0.135999	0.888619	1.7754	0.768231	-0.165115	-0.311164	AT1G16860.1	76
AT1G16860	Plasma membrane-localized proteins that negatively regulate cellulose synthesis by inhibiting the exocytosis of CESAs.	(SHOU4L)	(SHOU4L)	S	11	0.163301	-2.8086	0.41527	-2.99104	-3.34664	-2.64937	-4.17566	-0.828964	-0.146325	-0.831753	-0.322329	-3.07263	-1.36155	-2.63971	-2.31832	0.68911	-2.21714	3	___1							0.999779	4.25519e-07	110.68	95.907	110.68	-2.1409	198230000	11	0.261459	1.44489	1.23945	0.695657	-0.392196	-0.41455	0.987158	-0.0231486	-0.0169153	AT1G16860.1	11
AT1G17130	DUF572 domain protein involved in alternative splicing.	(CWC16B)	(CWC16B)	S	326	0.148125	-0.776537	-1.05361	-0.464439	-0.105663	-0.549376	-0.237057	0.0755482	0.236476	-0.751379	0.0830898	0.184135	0.0242405	0.351154	0.00360107	-0.303473	-0.0445976	2	___1							0.999993	2.13867e-54	222.91	210.63	153.19	-0.60412	605470000	326	0.294801	-0.332478	-1.14766	0.0755991	-0.390647	-2.23594	0.238917	-0.421792	-1.33669	AT1G17130.1;AT1G17130.2	326;333
AT1G17210	IAP-like protein 1;(source:Araport11)	IAP-LIKE PROTEIN 1 (ILP1)	ARABIDOPSIS IAP-LIKE PROTEIN (ATILP1);IAP-LIKE PROTEIN 1 (ILP1)	S	505	3.46622	2.13827	2.43558	2.72867	2.48787	2.44633	3.67557	3.97833	3.414	3.23318	3.40925	3.55501	4.02094	3.66631	3.16614	2.85251	3.23435	3	___1							1	1.62247e-46	202.98	194.13	202.98	-0.29672	4753900000	505	0.38815	-0.454844	-0.930226	0.270496	-0.600395	-1.23852	0.314694	-0.392151	-1.11721	AT1G17210.1	505
AT1G17210	IAP-like protein 1;(source:Araport11)	IAP-LIKE PROTEIN 1 (ILP1)	ARABIDOPSIS IAP-LIKE PROTEIN (ATILP1);IAP-LIKE PROTEIN 1 (ILP1)	S	547	-2.59892	-1.91973	-2.66948	-3.09194	-0.158518	-0.472446	-1.01671	-1.86901	-3.71782	-0.885929	-2.47242	-4.06604	-0.885303	-1.75374	-2.91794	-1.24082	-3.50209	3	___1	+	Col-0_W_Col-0_D					1	1.62482e-05	90.836	72.011	90.836	-0.6626	397610000	547	0.00908232	-1.69084	-3.78916	0.196196	1.35586	1.49085	0.980408	-0.0164021	-0.0258093	AT1G17210.1	547
AT1G17210	IAP-like protein 1;(source:Araport11)	IAP-LIKE PROTEIN 1 (ILP1)	ARABIDOPSIS IAP-LIKE PROTEIN (ATILP1);IAP-LIKE PROTEIN 1 (ILP1)	S	554	3.14916	2.28139	2.12737	2.5722	0.307253	0.237255	2.22196	3.40813	2.60889	3.17453	2.78651	2.65377	0.921143	3.20409	2.57735	2.3308	2.39211	3	___1							0.99939	4.81183e-17	163.15	117.79	151.47	1.5821	2690000000	554	0.265405	0.988882	1.22807	0.536932	-0.716019	-0.662553	0.732048	0.0991092	0.362143	AT1G17210.1	554
AT1G17210	IAP-like protein 1;(source:Araport11)	IAP-LIKE PROTEIN 1 (ILP1)	ARABIDOPSIS IAP-LIKE PROTEIN (ATILP1);IAP-LIKE PROTEIN 1 (ILP1)	S	322	1.39101	1.78839	1.46605	1.46135	1.29121	1.18782	1.15457	2.02973	1.26122	2.00896	1.29922	1.14904	0.0147858	1.75097	1.53614	1.55591	1.50128	2	___1							1	9.03157e-31	229.4	188.72	190.46	0.12291	1225400000	322	0.639711	0.110865	0.492735	0.407141	0.444236	0.904619	0.968414	-0.00441297	-0.0416185	AT1G17210.1	322
AT1G17210	IAP-like protein 1;(source:Araport11)	IAP-LIKE PROTEIN 1 (ILP1)	ARABIDOPSIS IAP-LIKE PROTEIN (ATILP1);IAP-LIKE PROTEIN 1 (ILP1)	S	762	-0.163179	0.0159855	-0.356224	-0.55682	-1.25045	-1.43371	-0.311382	-0.265265	-0.287953	0.0733032	-3.44191	-0.0199127	-3.65787	0.279949	-1.16245	-0.824421	-0.935358	2	___1					+	Col-0_W_5A-1_W	0.999996	0.00150656	72.433	56.209	72.433	0.29301	630940000	762	0.147091	0.550143	1.66439	0.788101	0.31741	0.283578	0.00834337	0.709018	4.21806	AT1G17210.1	762
AT1G17210	IAP-like protein 1;(source:Araport11)	IAP-LIKE PROTEIN 1 (ILP1)	ARABIDOPSIS IAP-LIKE PROTEIN (ATILP1);IAP-LIKE PROTEIN 1 (ILP1)	S	767	0.934835	0.706371	0.662977	0.993834	-2.80512	-2.35226	1.26159	1.27866	0.875316	1.41265	0.680674	0.934931	-1.32785	1.39357	0.0583324	0.188961	0.554525	2	___1					+	Col-0_W_5A-1_W	0.999523	2.7562e-05	106.52	80.395	52.887	0.28976	1037900000	767	0.234081	1.47879	1.3228	0.538036	-0.987832	-0.660683	0.016682	0.557231	3.53325	AT1G17210.1	767
AT1G17210	IAP-like protein 1;(source:Araport11)	IAP-LIKE PROTEIN 1 (ILP1)	ARABIDOPSIS IAP-LIKE PROTEIN (ATILP1);IAP-LIKE PROTEIN 1 (ILP1)	S	22	-2.86236	-2.08647	-1.6509	-1.69649	-3.91044	-4.1999	-0.857082	-0.89678	-3.10554	-2.74708	-2.92873	-1.0754	-3.00624	-1.18262	-1.79809	-1.8779	-2.89361	2	___1							0.990477	1.98011e-20	166.48	152.39	166.48	0.2988	95706000	22	0.697564	0.391994	0.407813	0.581443	-0.711297	-0.589035	0.8046	0.115808	0.260865	AT1G17210.1	22
AT1G17210	IAP-like protein 1;(source:Araport11)	IAP-LIKE PROTEIN 1 (ILP1)	ARABIDOPSIS IAP-LIKE PROTEIN (ATILP1);IAP-LIKE PROTEIN 1 (ILP1)	S	285	0.355547	-1.90457	-1.41753	-0.922106	-4.17636	-2.5258	0.0683784	0.725765	-0.157491	-0.669174	-0.0352058	0.0299511	-1.45507	0.446821	-0.454084	-3.29471	-3.09644	2	___1							1	8.40438e-14	151.04	135.45	43.297	-2.8144	497160000	285	0.698107	0.504839	0.407031	0.458646	-1.15091	-0.802589	0.229797	1.30958	1.36728	AT1G17210.1	285
AT1G17360	LOW protein: protein phosphatase 1 regulatory subunit-like protein;(source:Araport11)	0	0	S	706	-0.13698	-0.36314	-0.284014	-0.614719	-2.73565	-3.14171	-0.932125	-0.83799	0.071578	0.868849	-0.494648	-2.86164	-1.74286	-2.61442	-0.709833	-2.91593	-0.981773	2	___1	+	Col-0_W_Col-0_D					0.888944	0.000455584	120.09	29.982	120.09	0.10399	219540000	706	0.0421789	1.56215	2.57275	0.545746	0.494436	0.647691	0.1019	1.18613	2.0003	AT1G17360.1	706
AT1G17370	Encodes an RNA?binding protein involved in stress granule formation. Regulated by a transposable element small RNA.	OLIGOURIDYLATE BINDING PROTEIN 1B (UBP1B)	OLIGOURIDYLATE BINDING PROTEIN 1B (UBP1B)	S	241	1.18768	1.16255	1.63891	-2.71843	-2.96015	-3.50678	-3.22543	-3.30574	1.13339	-3.55174	-3.20111	-3.05538	-1.02798	0.640472	1.40004	0.368885	-3.64743	2	___1	+	Col-0_W_Col-0_D					0.999979	7.36913e-38	208.47	146.06	208.47	-0.14011	513950000	241	0.0130961	3.5672	3.4829	0.0676228	-2.1019	-2.3251	0.615451	0.943842	0.535196	AT1G17370.1	241
AT1G17440	Encodes one of two Arabidopsis proteins with similarity to the TBP-associated factor TAF12. The gene product is an EIN3-interacting TFIID transcription factor required for proper ethylene response, including ERF1 induction. Loss of function mutants show enhanced response to ethylene. Located in nucleus and expressed throughout the plant. Required for ERF1 expression. Cytokinin-hypersensitive 1 (C…	ENHANCED ETHYLENE RESPONSE 4 (EER4)	CYTOKININ-HYPERSENSITIVE 1 (CKH1);ENHANCED ETHYLENE RESPONSE 4 (EER4);TBP-ASSOCIATED FACTOR 12B (TAF12b); (NOBIRO6)	S	11	-3.07174	-2.68463	-1.99078	-3.63217	-3.38218	-2.76653	-2.69424	0.0462303	0.0690184	0.0195255	-0.162996	-2.99089	-1.26416	-3.10322	-3.00949	-3.13722	-4.12547	2	___1							0.986351	1.82224e-05	106.32	93.696	106.32	0.21354	66149000	11	0.470461	-0.64565	-0.770106	0.815719	0.253578	0.245648	NaN	0	NaN	AT1G17440.2;AT1G17440.1	11;11
AT1G17580	Encodes a member of the type XI myosin protein family involved in organelle trafficking and overall plant development.	MYOSIN 1 (MYA1)	MYOSIN XI 1 (XI-1);MYOSIN 1 (MYA1);ARABIDOPSIS MYOSIN 1 (ATMYA1)	S	1510	-1.87074	-2.2094	-2.30475	-1.47051	-0.928102	-1.80117	-1.80903	-2.00935	-1.7162	-3.59161	-2.40919	-3.17768	-1.77322	-1.71247	-2.52022	-1.91014	-1.44032	2	___1							1	0.000446029	87.913	60.815	62.303	0.24084	126590000	1510	0.326944	-0.326938	-1.06716	0.288108	0.584211	1.18821	0.98465	-0.00695801	-0.0202205	AT1G17580.1	1510
AT1G17745	encodes a 3-Phosphoglycerate dehydrogenase The mRNA is cell-to-cell mobile.	3-PHOSPHOGLYCERATE DEHYDROGENASE (PGDH)	PHOSPHOGLYCERATE DEHYDROGENASE 2 (PGDH2);3-PHOSPHOGLYCERATE DEHYDROGENASE (PGDH)	S	71	-1.35644	-4.04718	-3.51833	-2.61174	1.3115	0.692007	-0.415285	-0.746878	-0.653821	-1.15962	-0.320326	-0.0385361	-2.76041	-0.369204	-3.87895	-1.34643	-1.09101	2	___1	+	Col-0_W_Col-0_D					0.997533	1.13829e-42	206.62	192.06	173.28	0.36336	1232500000	71	0.00653546	-3.09376	-4.07546	0.22461	1.26638	1.38519	0.479956	-0.777957	-0.762887	AT1G17745.2;AT1G17745.1	71;71
AT1G17840	Encodes a plasma membrane-localized ATP-binding cassette transporter, that is required for cutin transport to the extracellular matrix. The mRNA is cell-to-cell mobile.	ATP-BINDING CASSETTE G11 (ABCG11)	(AtABCG11);ARABIDOPSIS THALIANA WHITE-BROWN COMPLEX HOMOLOG PROTEIN 11 (ATWBC11);CUTICULAR DEFECT AND ORGAN FUSION 1 (COF1);ATP-BINDING CASSETTE G11 (ABCG11);DESPERADO (DSO);WHITE-BROWN COMPLEX HOMOLOG PROTEIN 11 (WBC11)	S	686	-0.565666	-0.743227	-2.91025	-1.71544	-2.98103	-3.30536	-1.12663	0.0283375	-0.674745	0.010004	-0.481058	-2.78557	-1.88463	-0.637381	-0.798252	-0.864374	-1.33007	2	___1							0.773759	6.72981e-30	190.25	163.82	190.25	0.80909	259430000	686	0.717118	0.362523	0.37988	0.945332	-0.0769788	-0.0720804	0.48973	-0.486082	-0.745103	AT1G17840.1	686
AT1G17840	Encodes a plasma membrane-localized ATP-binding cassette transporter, that is required for cutin transport to the extracellular matrix. The mRNA is cell-to-cell mobile.	ATP-BINDING CASSETTE G11 (ABCG11)	(AtABCG11);ARABIDOPSIS THALIANA WHITE-BROWN COMPLEX HOMOLOG PROTEIN 11 (ATWBC11);CUTICULAR DEFECT AND ORGAN FUSION 1 (COF1);ATP-BINDING CASSETTE G11 (ABCG11);DESPERADO (DSO);WHITE-BROWN COMPLEX HOMOLOG PROTEIN 11 (WBC11)	S	688	1.21123	1.34488	-3.84929	1.16123	0.0347385	-3.10459	0.641695	1.37952	1.54929	1.31985	1.48455	0.35553	0.0844402	1.50153	1.01037	1.31433	0.788679	2	___1							0.998141	6.44476e-77	264.64	242.41	247.35	0.84054	2102400000	688	0.891488	0.229173	0.142317	0.490457	-0.909327	-0.743791	0.51027	-1.07078	-0.708536	AT1G17840.1	688
AT1G17840	Encodes a plasma membrane-localized ATP-binding cassette transporter, that is required for cutin transport to the extracellular matrix. The mRNA is cell-to-cell mobile.	ATP-BINDING CASSETTE G11 (ABCG11)	(AtABCG11);ARABIDOPSIS THALIANA WHITE-BROWN COMPLEX HOMOLOG PROTEIN 11 (ATWBC11);CUTICULAR DEFECT AND ORGAN FUSION 1 (COF1);ATP-BINDING CASSETTE G11 (ABCG11);DESPERADO (DSO);WHITE-BROWN COMPLEX HOMOLOG PROTEIN 11 (WBC11)	S	27	-2.84789	-3.17668	0.143389	-0.61758	-0.0989285	-0.553352	-3.11104	1.3991	-3.04599	-3.42248	-2.53157	-3.38519	-3.3495	1.91375	-3.16835	-3.71352	0.152811	3	___1							0.942153	0.000991702	54.05	47.474	53.408	-0.21452	360090000	27	0.438184	-1.03364	-0.830238	0.605407	1.01592	0.550908	0.677215	0.618327	0.441611	AT1G17840.1	27
AT1G17880	basic transcription factor 3;(source:Araport11)	BASIC TRANSCRIPTION FACTOR 3 (BTF3)	(ATBTF3);BASIC TRANSCRIPTION FACTOR 3 (BTF3)	S	124	-2.21103	-2.94505	-3.29514	-2.85787	2.27544	2.3352	-0.32513	-0.817427	-2.43026	-2.351	-2.73932	-2.32005	1.19743	-2.47973	-3.42425	-3.45742	-2.55231	3	___1	+	Col-0_W_Col-0_D					0.982378	1.22451e-08	85.162	78.893	85.162	-0.65638	482710000	124	0.00530289	-3.69429	-4.26314	0.202379	2.0678	1.46666	NaN	0	NaN	AT1G17880.1	124
AT1G18040	cyclin-dependent kinase D1;(source:Araport11)	CYCLIN-DEPENDENT KINASE D1;3 (CDKD1;3)	CYCLIN-DEPENDENT KINASE D1;3 (AT;CDCKD;3);CYCLIN-DEPENDENT KINASE D1;3 (CDKD1;3); (CAK2AT)	S	327	-3.12918	-2.69782	-2.94783	-4.16095	-4.717	-3.84327	-3.22709	-3.61198	-2.89952	-2.81343	-2.61909	-4.01363	-2.87924	-3.96397	-2.33748	-3.67733	-4.41486	3	___1							0.989552	0.0475995	43.184	32.858	43.184	-0.096755	25610000	327	0.220637	0.615893	1.36697	0.654274	-0.23089	-0.475807	0.718172	0.242614	0.38198	AT1G18040.1	327
AT1G18070	Translation elongation factor EF1A/initiation factor IF2gamma family protein;(source:Araport11)	(EF-1alpha)	(EF-1alpha)	S	14	-3.27094	-0.804741	-0.866291	-0.686924	0.0808239	-1.1376	-3.17914	-0.45332	-3.81362	-2.07386	-0.206348	0.56287	1.37414	-1.85676	-0.879879	-1.07182	-0.868244	3	___1							1	2.01674e-27	163	148.96	163	0.32667	274350000	14	0.812375	-0.234915	-0.248038	0.353056	-1.19906	-1.0234	0.554706	-0.467245	-0.632742	AT1G18070.1;AT1G18070.2;AT1G18070.3	14;14;14
AT1G18070	Translation elongation factor EF1A/initiation factor IF2gamma family protein;(source:Araport11)	(EF-1alpha)	(EF-1alpha)	S	59	-2.99498	-2.47379	-2.69047	-3.76535	-1.84399	-0.680523	-2.44732	-0.21472	-0.471671	-3.31298	-0.513514	0.716549	0.263571	-0.353167	-2.92113	-2.98897	-3.35812	4	___1	+	Col-0_W_Col-0_D					0.999947	1.71662e-05	59.187	48.835	59.187	0.19872	139760000	59	0.0283874	-1.68451	-2.87107	0.0718826	-1.50562	-2.27616	NaN	0	NaN	AT1G18070.1;AT1G18070.2;AT1G18070.3	59;59;59
AT1G18150	Encodes mitogen-activated protein kinase 8 (MPK8). MPK8 connects protein phosphorylation, Ca2+, and ROS in the wound-signaling pathway.	(ATMPK8)	(ATMPK8); (MPK8)	S	539	1.92723	0.392576	0.0125828	0.0442486	0.775896	0.333633	0.558781	1.0159	1.07432	0.247965	1.04512	-0.409502	1.91768	-0.645609	0.269081	1.12896	0.850407	2	___1							1	5.46729e-113	304.7	289.6	304.7	-0.77391	2605800000	539	0.876878	-0.0768919	-0.161662	0.610215	0.38353	0.543368	0.798183	-0.155323	-0.269679	AT1G18150.3;AT1G18150.2;AT1G18150.1	539;539;539
AT1G18160	required for ABA- and osmotic-stress-MAP3 kinase required for activation of SnRK2 kinases, enabling robust ABA and osmotic stress signal transduction.	(M3Kdelta7)	(M3Kdelta7)	S	462	0.478432	-0.51018	-0.10634	-0.360424	-1.19023	-0.851194	-0.349054	0.456448	0.419608	0.538757	0.340347	-2.51033	-1.97244	0.242388	-0.168552	-0.0466118	-3.54744	2	___1							0.999978	2.82744e-19	175.29	144.11	175.29	0.4708	360460000	462	0.424363	0.35888	0.856967	0.309319	0.929953	1.13113	0.307185	1.12957	1.13671	AT1G18160.2;AT1G18160.1	462;462
AT1G18190	This gene is predicted to encode a protein that functions as a Golgi apparatus structural component known as a golgin in mammals and yeast. A fluorescently-tagged version of GC2 co-localizes with Golgi markers, and this localization appears to be replicated using the C-terminal (508?668 aa) portion of the protein.	GOLGIN CANDIDATE 2 (GC2)	GOLGIN CANDIDATE 2 (GC2)	S	43	0.00245476	-0.068018	-0.397543	-0.719854	-2.5432	-0.37051	-0.161325	-3.72728	0.0688295	0.662809	-3.63898	-2.99408	0.172771	-0.32481	-0.603975	-0.732037	-0.727015	2	___1							0.950739	2.33903e-16	183.81	165.67	183.81	-1.3684	290430000	43	0.161399	1.40484	1.59691	0.640386	-0.651874	-0.496821	0.106813	0.391935	1.96346	AT1G18190.1	43
AT1G18210	Calcium-binding EF-hand family protein;(source:Araport11)	0	0	S	54	-1.91906	-2.28747	-2.50843	-2.52441	0.943249	1.82245	0.44244	0.965464	-0.789001	-1.20763	-2.12326	-1.48049	0.664995	0.348602	-2.65439	-2.31417	-0.782244	2	___1	+	Col-0_W_Col-0_D					0.998603	2.74902e-10	145.17	113.98	128.31	0.1704	1403000000	54	4.37218e-05	-3.35324	-10.5043	0.126257	1.19903	1.83314	0.475716	-0.392908	-0.770681	AT1G18210.2;AT1G18210.1	54;54
AT1G18210	Calcium-binding EF-hand family protein;(source:Araport11)	0	0	S	88	-0.670927	-2.52816	-1.62594	-2.48227	0.952818	0.540457	-0.219479	-0.746771	0.748986	-3.37591	0.474972	-2.68891	0.474567	-0.167925	-3.47642	-3.54223	-3.09401	2	___1	+	Col-0_W_Col-0_D			+	Col-0_W_5A-1_W	0.969506	3.33432e-75	272.64	227.21	138.55	0.25657	394460000	88	0.0148961	-1.95858	-3.37792	0.362646	0.925847	1.0013	0.0334434	1.54406	2.90888	AT1G18210.2;AT1G18210.1	88;88
AT1G18840	Member of IQ67 (CaM binding) domain containing family.	IQ-DOMAIN 30 (IQD30)	IQ-DOMAIN 30 (IQD30)	S	75	-2.89325	0.974813	0.76516	1.41295	1.75211	-2.44588	2.71732	-4.19493	-3.01829	-2.79717	-3.05389	-3.32441	-3.67962	-1.99117	1.87444	-3.6313	2.07304	3	___1							0.999937	7.64434e-13	101.79	93.756	101.79	0.37581	752010000	75	0.763607	0.60776	0.314753	0.27512	2.45556	1.22503	0.984304	-0.0404754	-0.0206751	AT1G18840.3;AT1G18840.2;AT1G18840.1	75;75;75
AT1G18840	Member of IQ67 (CaM binding) domain containing family.	IQ-DOMAIN 30 (IQD30)	IQ-DOMAIN 30 (IQD30)	S	521	-3.30246	-2.25	-3.34371	-2.59343	-0.333616	0.20042	-2.81552	-3.76643	-3.2646	-3.12708	-3.61113	-2.67987	-2.62716	-3.41349	-3.07255	-3.63101	-3.02675	2	___1							0.999122	0.00024585	90.444	61.141	84.753	1.5422	104990000	521	0.275204	-1.19361	-1.20045	0.335212	1.22805	1.0659	NaN	0	NaN	AT1G18840.3;AT1G18840.2;AT1G18840.1	521;521;521
AT1G18840	Member of IQ67 (CaM binding) domain containing family.	IQ-DOMAIN 30 (IQD30)	IQ-DOMAIN 30 (IQD30)	S	292	-2.85931	-2.35202	-2.27922	-3.18514	0.991873	0.800739	1.0918	-3.47377	-3.47087	-2.80454	-3.07086	-2.63631	-4.05671	-2.92132	-0.527426	-3.24366	-2.49924	2	___1							0.958392	4.39977e-40	213.23	188.21	213.23	0.83244	236520000	292	0.0673265	-2.52159	-2.22935	0.0749349	3.05744	2.24297	0.460397	-0.578815	-0.799277	AT1G18840.3;AT1G18840.2;AT1G18840.1	292;292;292
AT1G18950	DDT domain superfamily;(source:Araport11)	DDT-RELATED PROTEIN4 (DDR4)	DDT-RELATED PROTEIN4 (DDR4)	S	12	0.912088	-3.12989	0.136442	0.0372372	-0.301809	-0.711479	0.507797	1.1925	-1.67434	0.867975	0.771101	-2.69426	-2.6089	-2.87799	0.734018	-2.29752	-2.12824	3	___1			+	Col-0_D_ost1_D			0.999987	2.34535e-09	118.43	107.01	118.43	0.61868	615890000	12	0.516195	-0.682783	-0.689635	0.00227386	2.8988	5.72569	0.614492	0.719549	0.53669	AT1G18950.1;AT1G18950.3;AT1G18950.2	12;12;12
AT1G19000	Homeodomain-like superfamily protein;(source:Araport11)	0	0	S	39	0.742401	0.717333	0.331438	0.497093	-3.07478	-2.89585	-1.60228	0.451639	0.792605	0.585388	0.263657	-1.7467	-2.57199	-1.26779	0.0978107	0.218512	0.29077	2	___1	+	Col-0_W_Col-0_D			+	Col-0_W_5A-1_W	1	3.718e-13	143.94	118.6	143.94	-0.11791	428570000	39	0.028329	2.35238	2.87264	0.93877	0.0818424	0.080755	0.0310898	0.369702	2.97187	AT1G19000.2;AT1G19000.1	39;39
AT1G19450	Major facilitator superfamily protein;(source:Araport11)	0	0	S	2	4.4969	4.00232	4.24742	4.12301	2.21267	1.82278	3.71019	4.46063	4.25388	4.12058	4.01541	2.89244	2.48021	3.57807	3.6176	-3.57963	3.15742	3	___1							1	2.50031e-09	132.86	85.668	46.362	0.22905	9030800000	2	0.113837	1.16584	1.8497	0.934126	0.0679949	0.086897	0.166939	3.15228	1.61636	AT1G19450.1	2
AT1G19835	TCS1 encodes a coiled-coil domain protein that binds to microtubules and co-localizes with the cortical microtubules. Mutants have defects in trichome branching and hypocotyl elongation. TCS1 interacts with ZWI and appears to be involved in microtubule assembly.	TRICHOME CELL SHAPE 1 (TCS1)	TRICHOME CELL SHAPE 1 (TCS1)	S	671	0.954975	0.837973	0.368484	1.11495	-0.587236	-3.44943	0.361198	-3.12029	1.42947	0.638914	1.49247	-1.13179	0.00399971	1.35487	0.577236	1.13202	1.54213	3	___1	+	Col-0_W_Col-0_D					1	6.90113e-52	225.3	192.75	225.3	0.51013	641640000	671	0.0382731	2.51803	2.64521	0.218846	-1.77463	-1.40555	0.419938	-0.264701	-0.87838	AT1G19835.6;AT1G19835.5;AT1G19835.4;AT1G19835.3;AT1G19835.2;AT1G19835.1	671;671;671;671;671;671
AT1G19870	Encodes a microtubule-associated protein.Member of IQ67 (CaM binding) domain containing family.	IQ-DOMAIN 32 (iqd32)	IQ-DOMAIN 32 (iqd32)	S	502	0.266369	-3.25452	-2.65202	-2.8208	1.37926	2.1206	0.10178	0.925652	0.10147	0.442137	0.406248	-1.10065	1.55124	-2.83792	-3.4768	-3.59572	-0.0913372	2	___1	+	Col-0_W_Col-0_D					0.999897	3.35761e-64	224.78	212.05	138.87	0.1637	1072800000	502	0.0117106	-3.24707	-3.5752	0.162982	1.9276	1.63497	0.848128	0.272708	0.201662	AT1G19870.1;AT1G19870.2	502;319
AT1G19870	Encodes a microtubule-associated protein.Member of IQ67 (CaM binding) domain containing family.	IQ-DOMAIN 32 (iqd32)	IQ-DOMAIN 32 (iqd32)	S	78	-0.375496	-0.708673	-3.39381	-1.03672	-3.84408	-2.87867	-3.25848	-0.522846	-0.603805	-0.596373	-2.98519	-0.464157	-0.420351	-0.251492	-1.15941	-0.41103	-2.8342	3	___1			+	Col-0_D_ost1_D			1	2.79785e-40	211.16	186.74	154.88	-0.4816	4260600000	78	0.258818	1.24734	1.24714	0.0481559	-2.24735	-2.60161	0.932679	0.0895367	0.088812	AT1G19870.1	78
AT1G19870	Encodes a microtubule-associated protein.Member of IQ67 (CaM binding) domain containing family.	IQ-DOMAIN 32 (iqd32)	IQ-DOMAIN 32 (iqd32)	S	479	-2.68964	-2.36862	-3.17252	-3.16343	-3.1805	-3.79855	-2.49078	-3.18021	-3.12405	-2.32857	-4.10127	-3.13962	-1.94042	-2.97783	-3.83859	-3.03526	-2.56226	2	___1							0.852315	2.61462e-05	106.17	82.425	106.17	-0.074493	39302000	479	0.379719	0.313959	0.948025	0.333915	-0.476554	-1.06906	0.479129	0.296819	0.764403	AT1G19870.1;AT1G19870.2	479;296
AT1G19870	Encodes a microtubule-associated protein.Member of IQ67 (CaM binding) domain containing family.	IQ-DOMAIN 32 (iqd32)	IQ-DOMAIN 32 (iqd32)	S	459	0.898102	1.19393	0.878555	-0.23138	0.197237	0.573679	0.932697	1.16698	0.688903	0.965935	0.321234	0.019804	0.471493	0.196245	0.466898	0.432343	0.361496	2	___1							0.999999	1.04829e-17	168.05	139.84	159.88	0.10852	3179700000	459	0.933712	-0.0328465	-0.0867253	0.13468	0.488468	1.78296	0.508984	0.264557	0.710794	AT1G19870.1;AT1G19870.2	459;276
AT1G19870	Encodes a microtubule-associated protein.Member of IQ67 (CaM binding) domain containing family.	IQ-DOMAIN 32 (iqd32)	IQ-DOMAIN 32 (iqd32)	S	706	0.29557	1.60384	-2.82464	0.51259	1.82004	1.67584	1.14155	0.43511	0.551801	0.815758	-0.561525	1.03934	1.32346	0.967367	0.606457	0.76363	0.146364	2	___1							0.996867	1.17863e-07	139.3	103.77	121.76	0.28721	850450000	706	0.220016	-1.3713	-1.36906	0.69626	0.15808	0.413672	0.615122	-0.608643	-0.535709	AT1G19870.1;AT1G19870.2	706;523
AT1G19870	Encodes a microtubule-associated protein.Member of IQ67 (CaM binding) domain containing family.	IQ-DOMAIN 32 (iqd32)	IQ-DOMAIN 32 (iqd32)	S	193	3.07504	2.39957	2.59108	-3.15751	2.06008	2.1362	2.86507	3.44528	3.21963	2.75533	3.21213	2.44128	3.00275	3.18932	3.02454	2.96742	3.41289	2	___1							0.988463	6.7808e-14	154.72	125.4	137.46	1.3915	2932100000	193	0.388132	-1.39961	-0.930263	0.585353	-0.251126	-0.582749	0.32319	-1.9079	-1.09562	AT1G19870.1;AT1G19870.2	193;10
AT1G20110	Encodes a protein that is localized to the peripheral membrane of late endosomal compartments. Involved in the regulation of mulitivesicular/prevacuolar compartment protein sorting. Loss of function mutations are embryo lethal. Regulates IRT1-dependent metal transport and metal homeostasis. The mRNA is cell-to-cell mobile.	FYVE-DOMAIN PROTEIN 1 (FYVE1)	FYVE-DOMAIN PROTEIN 1 (FYVE1);PIGMENT DEFECTIVE EMBRYO 330 (PDE330);FYVE DOMAIN PROTEIN REQUIRED FOR ENDOSOMAL SORTING 1 (FREE1)	S	231	-1.34075	-2.49972	-0.184832	-0.907843	1.36627	0.737749	0.774452	-3.30271	-2.2462	-1.36779	-1.15018	0.600445	0.948868	-0.0821247	-1.14196	-0.843178	-0.429808	2	___1							0.974872	3.63784e-59	235.23	216.63	235.23	-0.36278	779140000	231	0.37613	-1.12723	-0.955695	0.665653	-0.595122	-0.458769	0.506636	-0.428305	-0.714928	AT1G20110.1	231
AT1G20110	Encodes a protein that is localized to the peripheral membrane of late endosomal compartments. Involved in the regulation of mulitivesicular/prevacuolar compartment protein sorting. Loss of function mutations are embryo lethal. Regulates IRT1-dependent metal transport and metal homeostasis. The mRNA is cell-to-cell mobile.	FYVE-DOMAIN PROTEIN 1 (FYVE1)	FYVE-DOMAIN PROTEIN 1 (FYVE1);PIGMENT DEFECTIVE EMBRYO 330 (PDE330);FYVE DOMAIN PROTEIN REQUIRED FOR ENDOSOMAL SORTING 1 (FREE1)	S	218	2.73665	2.89033	2.93996	2.27753	1.87836	1.80625	3.03069	2.48789	2.76051	2.69065	2.2042	2.22756	2.11146	1.93029	1.97321	2.60899	2.04917	2	___1							0.998944	2.22459e-14	172.82	143.48	169.37	0.10191	2498400000	218	0.253013	0.410319	1.2643	0.5703	0.211028	0.607092	0.096378	0.500662	2.04399	AT1G20110.1	218
AT1G20200	PAM domain (PCI/PINT associated module) protein;(source:Araport11)	EMBRYO DEFECTIVE 2719 (emb2719)	HAPLESS 15 (HAP15);EMBRYO DEFECTIVE 2719 (emb2719)	S	14	0.591887	-3.94308	0.747118	-3.13514	-0.317198	-0.629742	0.706062	0.853867	-2.96643	-0.771984	-2.60635	0.592634	0.709078	1.45899	1.33317	1.14354	1.51439	2	___1							0.997867	5.88775e-65	240.59	212.73	157.98	1.1289	1144200000	14	0.261267	-1.58805	-1.24001	0.179601	-0.766987	-1.5596	0.11559	-2.76517	-1.90184	AT1G20200.1	14
AT1G20220	Together with other ALBA proteins phase separates into stress granules and processing bodies under heat stress and directly binds to and recruits mRNAs to protect from degradation. Confers thermotolerance through stabilizing HSF messenger RNAs in cytoplasmic granules.	(ATALBA2)	(ATALBA2); (ALBA4); (ALBA2)	S	147	2.23189	1.34553	1.82087	1.81877	1.30437	-3.03693	2.04156	3.32604	2.01377	1.97875	3.25013	0.214413	-3.76111	1.37877	1.58872	1.20679	2.85411	2	___1							1	6.55892e-81	311.08	287.99	311.08	0.022597	3833000000	147	0.543747	0.895506	0.643416	0.47002	1.6314	0.781235	0.872776	-0.0789398	-0.168524	AT1G20220.1	147
AT1G20370	Enzyme for the pseudouridine (&#936;) to uridine (U) conversion.	(TRUA1A)	(TRUA1A)	S	510	-1.54019	-1.89484	-3.1488	-2.27099	-4.13656	-2.66613	-1.86593	-1.44664	-1.46789	-2.68811	-1.32062	-1.5647	-1.71292	-0.852421	-1.69925	-1.76049	-1.81433	3	___1							1	0.000624694	65.423	37.011	42.708	0.67707	98252000	510	0.66216	0.31511	0.459342	0.178046	-1.15214	-1.56635	0.316765	-0.455681	-1.1119	AT1G20370.1	510
AT1G20440	Belongs to the dehydrin protein family, which contains highly conserved stretches of 7-17 residues that are repetitively scattered in their sequences, the K-, S-, Y- and lysine rich segments. Cold regulated gene, amino acid sequence homology with Group II LEA (late embryogenesis abundant) proteins. Also responds to osmotic stress, ABA, dehydration and inhibits e.coli growth while overexpressed. C…	COLD-REGULATED 47 (COR47)	COLD-REGULATED 47 (COR47); (RD17); (AtCOR47)	S	205	-2.99377	-2.64497	-2.55235	-3.34201	3.98514	3.95014	1.1684	-3.56711	-3.50829	-2.79069	-3.16358	-0.423719	3.89293	-0.654024	-3.19091	-3.27294	-3.02911	3	___1							1	8.6563e-49	186.53	179.46	146.76	-0.16741	2265200000	205	0.054124	-4.26742	-2.38867	0.862224	0.445745	0.182682	NaN	0	NaN	AT1G20440.1	205
AT1G20440	Belongs to the dehydrin protein family, which contains highly conserved stretches of 7-17 residues that are repetitively scattered in their sequences, the K-, S-, Y- and lysine rich segments. Cold regulated gene, amino acid sequence homology with Group II LEA (late embryogenesis abundant) proteins. Also responds to osmotic stress, ABA, dehydration and inhibits e.coli growth while overexpressed. C…	COLD-REGULATED 47 (COR47)	COLD-REGULATED 47 (COR47); (RD17); (AtCOR47)	S	64	1.66945	0.786224	1.1837	0.134718	3.90776	4.69701	2.88876	2.913	1.18865	0.643904	0.617659	3.71749	4.38739	2.33873	1.17495	1.57828	0.837	3	___1	+	Col-0_W_Col-0_D					1	1.26792e-39	228.39	194.09	80.236	1.1007	9086100000	64	0.00272653	-2.65811	-4.8943	0.873927	0.120427	0.166983	0.576144	-0.253222	-0.597595	AT1G20440.1	64
AT1G20440	Belongs to the dehydrin protein family, which contains highly conserved stretches of 7-17 residues that are repetitively scattered in their sequences, the K-, S-, Y- and lysine rich segments. Cold regulated gene, amino acid sequence homology with Group II LEA (late embryogenesis abundant) proteins. Also responds to osmotic stress, ABA, dehydration and inhibits e.coli growth while overexpressed. C…	COLD-REGULATED 47 (COR47)	COLD-REGULATED 47 (COR47); (RD17); (AtCOR47)	S	55	-2.46462	-2.02619	-2.86134	-2.72937	1.56224	1.63074	-0.993994	-3.17467	-3.8219	-2.89699	-4.79537	-3.41741	-3.79209	-2.29849	-2.46115	-2.65569	-3.43373	3	___1							0.999822	3.97061e-40	213.37	197.6	213.37	-0.41028	333130000	55	0.0989067	-2.27646	-1.95111	0.0933607	2.92541	2.06898	0.364307	0.329806	0.997524	AT1G20440.1	55
AT1G20440	Belongs to the dehydrin protein family, which contains highly conserved stretches of 7-17 residues that are repetitively scattered in their sequences, the K-, S-, Y- and lysine rich segments. Cold regulated gene, amino acid sequence homology with Group II LEA (late embryogenesis abundant) proteins. Also responds to osmotic stress, ABA, dehydration and inhibits e.coli growth while overexpressed. C…	COLD-REGULATED 47 (COR47)	COLD-REGULATED 47 (COR47); (RD17); (AtCOR47)	S	22	-2.92678	-3.23218	-3.37478	-3.20223	6.87275	6.69944	3.96424	-3.23322	-0.426173	-2.23398	-0.325539	3.21648	7.00916	1.65406	0.207596	-0.363506	-0.209618	3	___1	+	Col-0_W_Col-0_D			+	Col-0_W_5A-1_W	0.999956	1.88305e-58	219.7	200.59	219.7	-0.63219	14257000000	22	0.0289698	-6.75979	-2.85556	0.906184	-0.384096	-0.12395	1.3085e-05	-3.06215	-16.947	AT1G20440.1	22
AT1G20440	Belongs to the dehydrin protein family, which contains highly conserved stretches of 7-17 residues that are repetitively scattered in their sequences, the K-, S-, Y- and lysine rich segments. Cold regulated gene, amino acid sequence homology with Group II LEA (late embryogenesis abundant) proteins. Also responds to osmotic stress, ABA, dehydration and inhibits e.coli growth while overexpressed. C…	COLD-REGULATED 47 (COR47)	COLD-REGULATED 47 (COR47); (RD17); (AtCOR47)	S	170	-3.62766	-3.08897	-2.67039	-2.80222	5.01473	4.73639	2.30386	-3.62025	-3.15184	-3.19534	-4.203	-2.92362	3.50957	-2.64731	-2.91867	-3.79701	-3.96217	4	___1	+	Col-0_W_Col-0_D					0.97114	1.48197e-42	187.64	179.58	136.61	0.69052	5719200000	170	0.0430184	-5.15599	-2.5581	0.386998	2.7958	0.947271	NaN	0	NaN	AT1G20440.1	170
AT1G20440	Belongs to the dehydrin protein family, which contains highly conserved stretches of 7-17 residues that are repetitively scattered in their sequences, the K-, S-, Y- and lysine rich segments. Cold regulated gene, amino acid sequence homology with Group II LEA (late embryogenesis abundant) proteins. Also responds to osmotic stress, ABA, dehydration and inhibits e.coli growth while overexpressed. C…	COLD-REGULATED 47 (COR47)	COLD-REGULATED 47 (COR47); (RD17); (AtCOR47)	S	172	-2.81925	-2.89338	-3.46443	-3.90879	3.41153	3.32119	0.524294	-4.2446	-3.07032	-3.48725	-2.92387	-3.35501	2.47349	-1.52666	-2.12367	-3.33719	-3.16887	4	___1							0.955861	1.48197e-42	187.64	179.58	130.89	-0.048454	4149000000	172	0.068316	-4.02457	-2.21874	0.570857	1.55583	0.606184	NaN	0	NaN	AT1G20440.1	172
AT1G20450	Encodes a gene induced by low temperature and dehydration. Inhibits e.coli growth while overexpressed. Belongs to the dehydrin protein family, which contains highly conserved stretches of 7-17 residues that are repetitively scattered in their sequences, the K-, S-, Y- and lysine rich segments. LTI29 and LTI30 double overexpressors confer cold tolerance. Localized to membranes and cytoplasm.	EARLY RESPONSIVE TO DEHYDRATION 10 (ERD10)	LOW TEMPERATURE INDUCED 29 (LTI29);LOW TEMPERATURE INDUCED 45 (LTI45);EARLY RESPONSIVE TO DEHYDRATION 10 (ERD10)	S	52	-3.79143	-2.25601	-2.89403	-2.64514	1.13841	2.1442	-0.884701	-3.38468	-3.159	-3.35975	-3.93687	-2.79128	-0.551586	-3.78379	-3.19087	-3.64002	-4.44343	3	___1							0.996435	5.45444e-10	138.82	106.46	129.07	0.65295	291160000	52	0.0808138	-2.64996	-2.09699	0.253738	2.12886	1.28922	NaN	0	NaN	AT1G20450.2;AT1G20450.1	52;52
AT1G20450	Encodes a gene induced by low temperature and dehydration. Inhibits e.coli growth while overexpressed. Belongs to the dehydrin protein family, which contains highly conserved stretches of 7-17 residues that are repetitively scattered in their sequences, the K-, S-, Y- and lysine rich segments. LTI29 and LTI30 double overexpressors confer cold tolerance. Localized to membranes and cytoplasm.	EARLY RESPONSIVE TO DEHYDRATION 10 (ERD10)	LOW TEMPERATURE INDUCED 29 (LTI29);LOW TEMPERATURE INDUCED 45 (LTI45);EARLY RESPONSIVE TO DEHYDRATION 10 (ERD10)	S	175	-2.44833	-1.85364	-3.34798	-3.40267	0.381374	1.42178	-0.896433	-2.48404	-2.70815	-3.37439	-2.74481	-3.64754	-4.02776	-4.01155	-2.90845	-3.06567	-3.92938	3	___1	+	Col-0_W_Col-0_D	+	Col-0_D_ost1_D			1	1.88415e-26	160.11	146.16	156.9	-0.20218	792760000	175	0.0423454	-2.36882	-2.56982	0.0174116	3.50129	3.49315	NaN	0	NaN	AT1G20450.2;AT1G20450.1	175;176
AT1G20450	Encodes a gene induced by low temperature and dehydration. Inhibits e.coli growth while overexpressed. Belongs to the dehydrin protein family, which contains highly conserved stretches of 7-17 residues that are repetitively scattered in their sequences, the K-, S-, Y- and lysine rich segments. LTI29 and LTI30 double overexpressors confer cold tolerance. Localized to membranes and cytoplasm.	EARLY RESPONSIVE TO DEHYDRATION 10 (ERD10)	LOW TEMPERATURE INDUCED 29 (LTI29);LOW TEMPERATURE INDUCED 45 (LTI45);EARLY RESPONSIVE TO DEHYDRATION 10 (ERD10)	S	207	-3.70603	-2.21365	-2.93732	-2.70561	4.21888	4.37975	1.56413	-2.93563	-2.53686	-3.46344	-3.19949	-1.38992	2.37467	-3.46404	-2.78124	-2.82894	-3.84419	3	___1	+	Col-0_W_Col-0_D					0.976598	2.53571e-12	117.03	105.61	108.88	-0.88584	1840900000	207	0.0352682	-4.69744	-2.70653	0.336039	2.63321	1.06388	NaN	0	NaN	AT1G20450.2;AT1G20450.1	207;208
AT1G20450	Encodes a gene induced by low temperature and dehydration. Inhibits e.coli growth while overexpressed. Belongs to the dehydrin protein family, which contains highly conserved stretches of 7-17 residues that are repetitively scattered in their sequences, the K-, S-, Y- and lysine rich segments. LTI29 and LTI30 double overexpressors confer cold tolerance. Localized to membranes and cytoplasm.	EARLY RESPONSIVE TO DEHYDRATION 10 (ERD10)	LOW TEMPERATURE INDUCED 29 (LTI29);LOW TEMPERATURE INDUCED 45 (LTI45);EARLY RESPONSIVE TO DEHYDRATION 10 (ERD10)	S	61	-0.18844	-1.71408	-0.998529	-1.00946	5.62272	5.97132	3.43333	1.90357	-0.166284	-0.405781	-0.34156	2.97908	5.04212	2.17765	-3.04917	-1.28696	-3.21341	2	___1	+	Col-0_W_Col-0_D					0.99994	1.59024e-08	128.54	94.155	128.31	-0.010612	6108900000	61	0.00207329	-5.21036	-5.17056	0.561315	0.833119	0.621815	0.059645	1.53889	2.4264	AT1G20450.2;AT1G20450.1	61;61
AT1G20450	Encodes a gene induced by low temperature and dehydration. Inhibits e.coli growth while overexpressed. Belongs to the dehydrin protein family, which contains highly conserved stretches of 7-17 residues that are repetitively scattered in their sequences, the K-, S-, Y- and lysine rich segments. LTI29 and LTI30 double overexpressors confer cold tolerance. Localized to membranes and cytoplasm.	EARLY RESPONSIVE TO DEHYDRATION 10 (ERD10)	LOW TEMPERATURE INDUCED 29 (LTI29);LOW TEMPERATURE INDUCED 45 (LTI45);EARLY RESPONSIVE TO DEHYDRATION 10 (ERD10)	S	65	-3.16893	-2.88039	-2.75652	-2.76133	4.37829	4.68416	1.13371	-0.562037	-3.8583	-3.39598	-3.69507	-3.63138	3.0965	-2.38129	-2.04125	-3.17671	-3.69576	2	___1	+	Col-0_W_Col-0_D					1	6.14604e-20	208.28	158.13	208.28	0.28758	2501500000	65	0.00604363	-5.30032	-4.14517	0.200622	3.38059	1.47346	0.858885	0.0794462	0.18717	AT1G20450.2;AT1G20450.1	65;65
AT1G20670	DNA-binding bromodomain-containing protein, interacts with core SWI/SNF complex components.	BROMODOMAIN-CONTAINING PROTEIN 1 (BRD1)	BROMODOMAIN-CONTAINING PROTEIN 1 (BRD1)	S	164	0.610279	0.334187	-3.23444	0.237494	-0.445707	-2.38711	-0.624649	0.379202	0.843453	0.543009	0.334682	0.543285	1.33018	0.687471	0.108818	0.476362	-0.21176	3	___1							0.999981	1.30922e-32	191.62	181.18	191.62	0.4486	734030000	164	0.820297	0.256446	0.23733	0.0731486	-1.62321	-2.26221	0.584025	-0.637594	-0.584881	AT1G20670.1	164
AT1G20670	DNA-binding bromodomain-containing protein, interacts with core SWI/SNF complex components.	BROMODOMAIN-CONTAINING PROTEIN 1 (BRD1)	BROMODOMAIN-CONTAINING PROTEIN 1 (BRD1)	S	279	1.86366	1.49599	1.4092	1.60016	0.910002	1.22017	1.88019	2.13069	2.04028	2.03685	1.76834	1.42046	1.26189	1.91405	1.5937	1.477	1.60349	3	___1							1	9.81986e-37	187.43	175.02	187.43	-0.22651	1783100000	279	0.855612	0.0569911	0.189949	0.993635	0.00313075	0.0083844	0.789588	0.0341876	0.281524	AT1G20670.1	279
AT1G20670	DNA-binding bromodomain-containing protein, interacts with core SWI/SNF complex components.	BROMODOMAIN-CONTAINING PROTEIN 1 (BRD1)	BROMODOMAIN-CONTAINING PROTEIN 1 (BRD1)	S	514	-0.0679989	-2.5511	-2.50107	-2.34486	-3.11508	-2.37303	-3.45808	-0.175436	0.500255	0.343464	0.238157	-2.91937	-0.858042	0.0481606	-3.13623	-0.12096	0.579174	2	___1							0.999486	2.12014e-09	130.72	103.31	130.72	0.35256	177390000	514	0.678507	0.41415	0.435388	0.404767	-1.03732	-0.909558	0.450357	-0.973584	-0.8184	AT1G20670.1	514
AT1G20670	DNA-binding bromodomain-containing protein, interacts with core SWI/SNF complex components.	BROMODOMAIN-CONTAINING PROTEIN 1 (BRD1)	BROMODOMAIN-CONTAINING PROTEIN 1 (BRD1)	S	631	-3.43669	-3.16211	-2.3736	-3.50198	-0.0419407	0.0109291	-3.20838	1.47849	1.65455	-3.43812	-3.12571	0.722418	-3.67276	-3.38542	0.683823	0.986296	-3.02926	3	___1	+	Col-0_W_Col-0_D					0.764941	0.000259671	57.144	46.628	56.728	0.59279	312150000	631	0.0394244	-2.67837	-2.62306	0.361786	1.6717	1.00326	0.0636376	-2.66555	-2.37398	AT1G20670.1	631
AT1G20760	EH domain containing protein.	ARABIDOPSIS THALIANA EH DOMAIN CONTAINING PROTEIN 1 (ATEH1)	ARABIDOPSIS THALIANA EH DOMAIN CONTAINING PROTEIN 1 (ATEH1)	S	988	-2.17112	-2.07385	-2.4144	-2.80446	-0.115082	-2.58429	0.876823	0.452103	0.0654097	-4.10908	-2.90581	0.988226	1.36312	1.03548	-3.34452	-1.4086	-0.262226	2	___1	+	Col-0_W_Col-0_D					0.998196	4.63876e-18	156.78	145.15	122.19	-1.7632	460970000	988	0.0430783	-2.02335	-2.55707	0.171183	-1.47155	-1.59687	0.412456	-0.694178	-0.893645	AT1G20760.1	988
AT1G20760	EH domain containing protein.	ARABIDOPSIS THALIANA EH DOMAIN CONTAINING PROTEIN 1 (ATEH1)	ARABIDOPSIS THALIANA EH DOMAIN CONTAINING PROTEIN 1 (ATEH1)	S	900	0.727011	-0.0644245	-0.111454	0.449064	0.408955	-0.115599	1.22146	1.17623	1.07984	1.45046	1.49034	0.551477	1.49048	0.874605	0.231911	-0.0789871	1.10366	2	___1							1	7.93302e-66	265.22	230.72	263.52	-0.39878	1173100000	900	0.309751	-0.422713	-1.10935	0.53127	-0.299426	-0.672185	0.676726	-0.168814	-0.442334	AT1G20760.1	900
AT1G20760	EH domain containing protein.	ARABIDOPSIS THALIANA EH DOMAIN CONTAINING PROTEIN 1 (ATEH1)	ARABIDOPSIS THALIANA EH DOMAIN CONTAINING PROTEIN 1 (ATEH1)	S	741	3.41478	2.572	2.72361	3.00813	2.15448	2.16691	3.28199	3.56604	3.43494	3.43317	3.53671	2.45072	2.64847	3.11921	2.83525	2.7893	3.36077	3	___1							0.994148	1.55775e-79	247.26	238.35	144.78	-0.14617	4599800000	741	0.750992	0.137273	0.332262	0.914303	0.0528892	0.113164	0.816379	-0.0654786	-0.244748	AT1G20760.1	741
AT1G20760	EH domain containing protein.	ARABIDOPSIS THALIANA EH DOMAIN CONTAINING PROTEIN 1 (ATEH1)	ARABIDOPSIS THALIANA EH DOMAIN CONTAINING PROTEIN 1 (ATEH1)	S	922	-1.15811	-3.53383	-2.96017	-1.31812	-0.691347	-1.48021	-0.319616	-1.60575	-2.6767	-0.755146	-1.63179	-0.0484066	-0.681362	-0.621874	-0.530666	-0.989672	-2.16545	2	___1							0.999157	0.000236075	92.039	30.002	92.039	-0.50249	407280000	922	0.118314	-1.21833	-1.82186	0.214662	-0.573682	-1.42066	0.266426	-1.01396	-1.25057	AT1G20760.1	922
AT1G20760	EH domain containing protein.	ARABIDOPSIS THALIANA EH DOMAIN CONTAINING PROTEIN 1 (ATEH1)	ARABIDOPSIS THALIANA EH DOMAIN CONTAINING PROTEIN 1 (ATEH1)	S	788	2.48961	1.95326	2.02296	1.9449	2.27598	2.46112	2.11545	1.83665	2.32472	2.90393	1.75419	2.04167	2.25646	1.95696	1.73664	1.97136	2.02011	2	___1							0.999865	3.67227e-24	199.31	184.63	193.16	0.30238	1991000000	788	0.72048	-0.0696192	-0.375111	0.636147	0.0872704	0.503284	0.308361	0.193307	1.13363	AT1G20760.1	788
AT1G20760	EH domain containing protein.	ARABIDOPSIS THALIANA EH DOMAIN CONTAINING PROTEIN 1 (ATEH1)	ARABIDOPSIS THALIANA EH DOMAIN CONTAINING PROTEIN 1 (ATEH1)	S	1018	-3.01837	-2.68479	-3.85762	-2.02312	-0.396273	-0.171558	-3.47205	-1.61177	-3.50307	-2.37308	-3.67201	0.0184193	-0.401932	-2.97423	-3.39642	-2.85326	-2.66149	2	___1							0.999995	0.0174621	67.726	64.747	60.518	0.119	110600000	1018	0.13036	-1.48306	-1.75183	0.814639	-0.293663	-0.247123	0.88464	0.0744154	0.152654	AT1G20760.1	1018
AT1G20760	EH domain containing protein.	ARABIDOPSIS THALIANA EH DOMAIN CONTAINING PROTEIN 1 (ATEH1)	ARABIDOPSIS THALIANA EH DOMAIN CONTAINING PROTEIN 1 (ATEH1)	S	826	-1.26704	-3.14186	-3.37604	-2.61779	-2.89015	-1.01214	0.0379257	0.13199	-1.27441	-1.17491	-0.59656	-1.79594	-1.36836	-1.93507	-1.4591	-2.5463	-0.0896358	2	___1							1	9.78348e-51	231.21	211.63	231.21	-0.28878	148610000	826	0.0961669	-1.66759	-1.97137	0.404688	0.766693	0.909722	0.19026	-1.23567	-1.51477	AT1G20760.1	826
AT1G20760	EH domain containing protein.	ARABIDOPSIS THALIANA EH DOMAIN CONTAINING PROTEIN 1 (ATEH1)	ARABIDOPSIS THALIANA EH DOMAIN CONTAINING PROTEIN 1 (ATEH1)	S	834	-2.9376	-2.66692	-3.00539	-3.76998	1.80207	1.97616	-1.27293	-2.72423	-2.97765	-3.59528	-2.96622	-1.51859	0.796421	-2.94295	-3.64809	-3.79962	-3.41807	2	___1	+	Col-0_W_Col-0_D					0.999998	1.31942e-50	229.48	216.38	197.86	-0.78219	362120000	834	0.0426012	-3.04024	-2.56534	0.510742	1.16697	0.707706	0.134011	0.526953	1.78683	AT1G20760.1	834
AT1G20760	EH domain containing protein.	ARABIDOPSIS THALIANA EH DOMAIN CONTAINING PROTEIN 1 (ATEH1)	ARABIDOPSIS THALIANA EH DOMAIN CONTAINING PROTEIN 1 (ATEH1)	S	859	-2.6779	-3.4314	-2.01418	-2.58541	-0.321846	-1.22343	-0.918015	-4.24282	-3.41437	-2.86262	-2.53752	-3.24627	-2.5958	-1.78665	-3.21321	-2.68179	-3.93032	2	___1							0.999999	0.000620283	77.698	24.529	77.698	3.1634	67187000	859	0.319818	-1.00069	-1.08442	0.464549	0.866383	0.791458	NaN	0	NaN	AT1G20760.1	859
AT1G20770	coiled-coil protein;(source:Araport11)	0	0	S	135	-0.394693	-0.709429	-0.610966	0.0713806	-0.438738	-2.66198	-0.531891	-1.13615	-0.0245333	-0.0144005	0.00942421	-3.3059	0.858561	-3.14525	0.182188	-1.32528	-2.68846	2	___1							0.999795	8.23991e-88	302.18	263.16	255.32	-0.74162	334470000	135	0.199761	0.781264	1.44064	0.625081	0.672007	0.520272	0.284801	0.866258	1.19744	AT1G20770.2;AT1G20770.1	135;135
AT1G20840	The protein encoded by this gene is found in the tonoplast (vacuole membrane) of Arabidopsis cells. The gene is expressed at highest levels in juvenile (sink) and adult (source) leaves, followed by flower tissues.	TONOPLAST MONOSACCHARIDE TRANSPORTER1 (TMT1)	TONOPLAST MONOSACCHARIDE TRANSPORTER1 (TMT1); (AtTMT1)	S	266	-2.11144	-1.79475	-2.59172	-2.96022	-1.75858	-3.15379	-4.28004	-1.93707	-2.96348	-2.70197	-2.75069	-3.29586	-3.30076	-3.11015	-3.36081	-3.37657	-3.13413	2	___1					+	Col-0_W_5A-1_W	0.999653	0.000939891	75.479	59.907	75.479	0.32885	37818000	266	0.538977	0.417838	0.651308	0.544372	0.453222	0.649997	0.0310804	0.92597	2.97214	AT1G20840.2;AT1G20840.1	266;266
AT1G20840	The protein encoded by this gene is found in the tonoplast (vacuole membrane) of Arabidopsis cells. The gene is expressed at highest levels in juvenile (sink) and adult (source) leaves, followed by flower tissues.	TONOPLAST MONOSACCHARIDE TRANSPORTER1 (TMT1)	TONOPLAST MONOSACCHARIDE TRANSPORTER1 (TMT1); (AtTMT1)	S	277	-2.64324	-1.51597	-1.09059	-2.07912	-2.21156	-3.47166	-1.16718	-3.16999	-1.01813	-2.2569	-1.17588	-0.775585	-1.95013	0.490093	-1.07567	-0.516056	-1.56568	3	___1							0.849555	3.38289e-08	91.113	79.148	91.113	-0.13521	219970000	277	0.319876	0.672868	1.08428	0.0939455	-1.75989	-2.06407	0.160397	-0.779762	-1.64738	AT1G20840.2;AT1G20840.1	277;277
AT1G20840	The protein encoded by this gene is found in the tonoplast (vacuole membrane) of Arabidopsis cells. The gene is expressed at highest levels in juvenile (sink) and adult (source) leaves, followed by flower tissues.	TONOPLAST MONOSACCHARIDE TRANSPORTER1 (TMT1)	TONOPLAST MONOSACCHARIDE TRANSPORTER1 (TMT1); (AtTMT1)	S	319	0.278608	0.371658	0.525507	0.513155	-0.593533	-2.0322	1.15427	0.572031	-0.272607	-2.50492	0.676735	-1.92348	-3.93124	0.64526	0.755257	0.942177	2.00638	3	___1							0.999997	7.98549e-16	154.13	132.56	134.28	-0.79144	667690000	319	0.394733	0.64709	0.916533	0.325157	1.51163	1.09069	0.0589238	-0.812372	-2.43627	AT1G20840.2;AT1G20840.1	319;319
AT1G20920	P-loop containing nucleoside triphosphate hydrolases superfamily protein;(source:Araport11)	REGULATOR OF CBF GENE EXPRESSION 1 (RCF1)	REGULATOR OF CBF GENE EXPRESSION 1 (RCF1)	S	324	0.462049	-2.73812	-3.6054	-3.21022	0.375139	0.254742	0.836098	0.822023	0.358447	0.288366	0.41461	0.562311	0.111305	0.977942	-1.84005	-3.09254	0.366465	2	___1	+	Col-0_W_Col-0_D					1	2.64427e-56	237.89	216.13	237.89	-0.93474	540390000	324	0.0232826	-2.84492	-3.02381	0.940731	0.0214812	0.0781623	0.611441	-0.750881	-0.541451	AT1G20920.7;AT1G20920.6;AT1G20920.5;AT1G20920.4;AT1G20920.3;AT1G20920.1	324;324;324;324;324;324
AT1G20920	P-loop containing nucleoside triphosphate hydrolases superfamily protein;(source:Araport11)	REGULATOR OF CBF GENE EXPRESSION 1 (RCF1)	REGULATOR OF CBF GENE EXPRESSION 1 (RCF1)	S	442	-3.64905	-3.71516	-3.29558	-3.01761	-2.22194	-0.871262	-1.53996	-2.24569	-2.64779	-2.80923	-3.05961	-3.85503	-2.75017	-3.22919	-3.9525	-4.11063	-2.01369	2	___1	+	Col-0_W_Col-0_D	+	Col-0_D_ost1_D			0.859336	1.17252e-06	114.69	84.437	114.69	-0.67314	59841000	442	0.00347639	-1.69964	-4.6575	0.0211381	1.55842	3.31439	0.923199	-0.0604074	-0.101366	AT1G20920.7;AT1G20920.6;AT1G20920.5;AT1G20920.4;AT1G20920.3;AT1G20920.1;AT1G20920.2;AT3G09620.1;AT3G09620.2	442;442;442;442;442;442;104;309;310
AT1G20970	calponin-like domain protein;(source:Araport11)	0	0	S	199	0.923508	-0.433428	0.44541	0.282761	-1.11448	-3.51954	0.252224	1.27879	1.0859	-3.45957	2.06495	-1.21428	-1.34098	0.0727787	0.749044	0.328842	1.91617	3	___1							0.993204	3.45864e-58	218.16	204.52	218.16	-0.29902	614390000	199	0.353742	1.08031	1.00489	0.96943	0.051742	0.0402784	0.238382	-0.693457	-1.33846	AT1G20970.1	199
AT1G20970	calponin-like domain protein;(source:Araport11)	0	0	S	124	0.141872	-3.45457	-2.48862	-3.51942	-0.330614	-2.40555	0.248112	0.394167	0.582225	0.402058	0.560919	1.45315	1.3655	0.810379	0.260075	0.313757	0.473831	2	___1					+	Col-0_W_5A-1_W	0.988123	1.51804e-56	244.88	228.7	244.88	0.45232	410770000	124	0.143394	-1.80671	-1.68285	0.077862	-1.73315	-2.21247	0.0460607	-2.67941	-2.63848	AT1G20970.1	124
AT1G21000	PLATZ transcription factor family protein;(source:Araport11)	(PLATZ1)	(PLATZ1);ABA-INDUCED EXPRESSION 1 (AIN1)	S	165	-2.22543	-1.71235	-2.43613	-2.36966	-1.71642	-1.05	-1.83954	-2.80958	-3.26991	-2.60505	-3.32223	-2.25115	-2.99527	-1.68312	-3.19355	-2.89198	-3.0137	2	___1					+	Col-0_W_5A-1_W	0.96928	5.08947e-05	97.579	81.689	97.579	-1.2013	86178000	165	0.436127	-0.332005	-0.834176	0.432224	0.45596	0.853767	0.00947108	0.84719	4.08738	AT1G21000.2;AT1G21000.1	165;168
AT1G21080	DNAJ heat shock N-terminal domain-containing protein;(source:Araport11)	0	0	S	274	0.335522	-0.346342	-1.07419	-0.72493	0.925138	0.536589	-0.0537529	-0.356838	-3.07556	-2.77508	-0.784412	0.359591	1.1356	-0.158278	-2.81421	-2.85984	-4.70207	2	___1					+	Col-0_W_5A-1_W	0.999994	6.11479e-21	177.04	157.65	151.04	1.7793	390130000	274	0.137436	-0.71527	-1.71359	0.70981	-0.182853	-0.394019	0.00504093	3.00622	4.76413	AT1G21080.2;AT1G21080.1	274;361
AT1G21170	Exocyst complex component SEC5;(source:Araport11)	0	0	S	179	0.524061	-2.03949	-3.18426	-3.18375	-0.0560379	0.255651	-2.97421	0.918703	0.994668	0.627462	0.995398	0.204058	0.161303	0.425964	-2.63463	0.192631	-3.47078	2	___1							1	4.9554e-19	234.3	177.15	216.06	-0.11525	341990000	179	0.265439	-1.50689	-1.22798	0.507912	-0.727748	-0.712679	0.999963	6.82672e-05	4.91384e-05	AT1G21170.1;AT1G21170.2	179;179
AT1G21200	sequence-specific DNA binding transcription factor;(source:Araport11)	0	0	S	86	1.09014	-2.74892	-3.11252	0.577833	0.553268	0.830013	0.955475	1.54755	1.01682	0.882662	0.978905	1.24358	1.42223	1.31962	-3.93026	0.565704	0.787363	3	___1							1	1.20813e-71	239.78	231.79	239.78	-0.30401	645990000	86	0.119792	-2.01994	-1.81291	0.215429	-0.356901	-1.41786	0.92141	-0.189305	-0.103738	AT1G21200.2;AT1G21200.1	86;86
AT1G21380	Encodes a member of the Arabidopsis TOL (TOM1-LIKE) family of ubiquitin binding proteins that acts redundantly in the recognition and further endocytic sorting of a PIN-FORMED (PIN)-type auxin carrier protein at the plasma membrane, modulating dynamic auxin distribution and associated growth responses.	TOM1-LIKE 3 (TOL3)	TOM1-LIKE 3 (TOL3)	S	294	5.91233	4.93032	4.98113	5.45218	4.53467	4.52727	5.77404	6.48604	5.98602	5.6902	6.33866	5.18672	5.46612	5.94473	-3.13323	5.47143	5.88659	3	___1							0.999997	2.34389e-80	232.98	221.34	232.98	-0.5717	29600000000	294	0.983554	-0.0115137	-0.021487	0.750739	-0.202019	-0.335681	0.345356	2.5774	1.04151	AT1G21380.1	294
AT1G21380	Encodes a member of the Arabidopsis TOL (TOM1-LIKE) family of ubiquitin binding proteins that acts redundantly in the recognition and further endocytic sorting of a PIN-FORMED (PIN)-type auxin carrier protein at the plasma membrane, modulating dynamic auxin distribution and associated growth responses.	TOM1-LIKE 3 (TOL3)	TOM1-LIKE 3 (TOL3)	S	455	-3.20643	-3.4523	-3.17398	-2.1448	-0.410666	-1.02526	-2.42857	-3.91313	-4.16833	-2.90257	-2.19905	-1.67147	-1.28926	-3.47905	-1.21254	-2.59418	-0.983204	2	___1					+	Col-0_W_5A-1_W	1	3.36755e-07	125.45	87.422	125.45	2.9706	107350000	455	0.254034	-1.04997	-1.26126	0.859174	0.202187	0.186781	0.049798	-1.39774	-2.57392	AT1G21380.1	455
AT1G21380	Encodes a member of the Arabidopsis TOL (TOM1-LIKE) family of ubiquitin binding proteins that acts redundantly in the recognition and further endocytic sorting of a PIN-FORMED (PIN)-type auxin carrier protein at the plasma membrane, modulating dynamic auxin distribution and associated growth responses.	TOM1-LIKE 3 (TOL3)	TOM1-LIKE 3 (TOL3)	S	383	-0.858807	-1.5766	-0.721657	-1.42389	-3.51458	-0.400536	2.01441	0.811563	-1.38118	-0.655781	0.502609	-2.97683	-4.6294	-2.44627	-2.5456	-2.68076	0.552805	2	___1							1	1.96617e-42	193.03	177.75	152.7	0.30179	1817300000	383	0.496458	-0.872952	-0.723746	0.096903	3.07855	2.03972	0.671767	0.412612	0.449677	AT1G21380.1	383
AT1G21580	Encodes a zinc-finger protein that co-localizes with the exosome-associated RNA helicase HEN2 and functions as a co-factor of nuclear RNA quality control by the nucleoplasmic exosome.	SUPPRESSOR OF PAS2 1 (SOP1)	SUPPRESSOR OF PAS2 1 (SOP1)	S	47	-2.52123	-2.34979	-2.25661	-3.08183	-3.07701	-1.86384	-2.53641	-3.33095	-4.70756	-2.49859	-3.89573	-3.65842	-3.26141	-3.39284	-3.79722	-2.86976	-4.19761	2	___1					+	Col-0_W_5A-1_W	0.97581	0.0148787	56.729	42.376	56.729	-0.71061	52206000	47	0.702631	0.149688	0.40054	0.122804	0.735504	1.8547	0.0424576	1.06917	2.70641	AT1G21580.9;AT1G21580.5;AT1G21580.2;AT1G21580.4;AT1G21580.8;AT1G21580.7;AT1G21580.6;AT1G21580.3;AT1G21580.1	47;47;47;47;47;47;47;47;47
AT1G21630	TPLATE Adaptor complex subunit.	ARABIDOPSIS THALIANA EH DOMAIN CONTAINING PROTEIN 2 (ATEH2)	ARABIDOPSIS THALIANA EH DOMAIN CONTAINING PROTEIN 2 (ATEH2)	S	1083	2.1294	1.62497	1.69246	1.8903	1.30635	0.946037	2.34917	2.72737	2.60953	2.60241	2.64261	1.9912	1.60441	2.58775	1.72296	1.59922	2.35381	2	___1							1	2.48312e-46	248.67	224.29	210.37	-0.98946	1856400000	1083	0.996403	0.0020504	0.00469925	0.696103	-0.228885	-0.4139	0.817332	-0.0577137	-0.243447	AT1G21630.3;AT1G21630.1;AT1G21630.4;AT1G21630.2	1083;1105;1112;1134
AT1G21630	TPLATE Adaptor complex subunit.	ARABIDOPSIS THALIANA EH DOMAIN CONTAINING PROTEIN 2 (ATEH2)	ARABIDOPSIS THALIANA EH DOMAIN CONTAINING PROTEIN 2 (ATEH2)	S	1115	-0.236103	-1.71451	-1.79878	-0.88159	0.483418	0.673122	0.148077	0.199215	-0.073844	0.807116	-0.102095	0.181953	1.51004	-0.127697	-0.609737	-1.3455	-0.5362	2	___1	+	Col-0_W_Col-0_D					1	0.000174611	143.7	127.03	143.7	0.31107	570820000	1115	0.00773211	-1.5337	-3.92782	0.756953	-0.145474	-0.326945	0.532753	-0.327267	-0.669656	AT1G21630.3;AT1G21630.1;AT1G21630.4;AT1G21630.2	1115;1137;1144;1166
AT1G21630	TPLATE Adaptor complex subunit.	ARABIDOPSIS THALIANA EH DOMAIN CONTAINING PROTEIN 2 (ATEH2)	ARABIDOPSIS THALIANA EH DOMAIN CONTAINING PROTEIN 2 (ATEH2)	S	560	-3.23206	-3.58946	-2.21026	-2.49371	0.388182	-0.0188046	-2.081	-2.82411	-3.64289	-3.23502	-2.63897	-2.88151	-2.57191	-2.96867	-2.93492	-3.90245	-3.61314	3	___1							0.993735	6.62097e-09	114.2	95.093	114.2	-0.48183	154200000	560	0.0837115	-1.74744	-2.07152	0.131604	1.67343	1.80091	NaN	0	NaN	AT1G21630.3;AT1G21630.1;AT1G21630.4;AT1G21630.2	560;560;560;560
AT1G21630	TPLATE Adaptor complex subunit.	ARABIDOPSIS THALIANA EH DOMAIN CONTAINING PROTEIN 2 (ATEH2)	ARABIDOPSIS THALIANA EH DOMAIN CONTAINING PROTEIN 2 (ATEH2)	S	961	0.0291443	-2.24162	-3.01366	0.231277	-4.02758	0.246075	0.893774	1.15461	-2.614	-2.57631	-1.61533	-3.36108	-1.46104	-2.84398	-1.08906	-0.955763	0.894295	2	___1							0.999291	1.84304e-12	134.32	106.67	134.32	0.4684	1218700000	961	0.596758	-0.815434	-0.558429	0.219396	2.12208	1.40359	0.467389	-0.865205	-0.78614	AT1G21630.3;AT1G21630.1;AT1G21630.4;AT1G21630.2	961;961;990;990
AT1G21630	TPLATE Adaptor complex subunit.	ARABIDOPSIS THALIANA EH DOMAIN CONTAINING PROTEIN 2 (ATEH2)	ARABIDOPSIS THALIANA EH DOMAIN CONTAINING PROTEIN 2 (ATEH2)	S	1002	-1.17099	-3.15624	-2.53016	-3.33901	-0.478022	-0.8937	-0.250284	-3.26653	-3.39165	-2.89727	-0.963341	-0.105986	1.46841	-0.56744	-3.90325	-3.14487	-3.90573	2	___1							0.99876	4.78291e-06	107.18	99.4	107.18	-0.80847	281850000	1002	0.169676	-1.32697	-1.56044	0.185812	-1.48713	-1.53317	0.134744	1.10218	1.7826	AT1G21630.3;AT1G21630.1;AT1G21630.4;AT1G21630.2	1002;1002;1031;1031
AT1G21630	TPLATE Adaptor complex subunit.	ARABIDOPSIS THALIANA EH DOMAIN CONTAINING PROTEIN 2 (ATEH2)	ARABIDOPSIS THALIANA EH DOMAIN CONTAINING PROTEIN 2 (ATEH2)	S	1123	0.540846	0.379469	0.0476856	0.258598	-0.0438595	-0.409929	1.04047	0.925886	1.26574	0.665077	0.889452	0.4666	0.128941	0.671993	0.648056	0.562624	0.950359	2	___1					+	Col-0_W_5A-1_W	1	1.16262e-53	218.88	204.63	212.26	0.005274	1730500000	1123	0.854231	-0.0714917	-0.191792	0.924247	-0.04437	-0.0999777	0.0466887	-0.413697	-2.62723	AT1G21630.3;AT1G21630.1;AT1G21630.4;AT1G21630.2	1123;1145;1152;1174
AT1G21660	Chaperone DnaJ-domain superfamily protein;(source:Araport11)	AUXILIN-LIKE3 (AUXILIN-LIKE3)	AUXILIN-LIKE3 (AUXILIN-LIKE3)	S	153	-2.91507	-2.8335	-2.48749	-2.8761	0.0195389	-0.334776	-1.94882	-1.79493	-1.83666	-2.00504	-2.00112	-2.00977	-0.710346	-2.31789	-3.14959	-2.82105	-2.02851	2	___1	+	Col-0_W_Col-0_D					0.975995	8.76772e-09	134.9	114.44	134.9	0.51432	138530000	153	0.0135825	-1.76329	-3.45303	0.399603	0.664589	0.92038	0.726478	-0.111653	-0.370085	AT1G21660.1	153
AT1G21750	Encodes a protein disulfide isomerase-like (PDIL) protein, a member of a multigene family within the thioredoxin (TRX) superfamily; isoform contains non-consensus GA donor splice site at intron 9. Transcript levels for this gene are up-regulated in response to three different chemical inducers of ER stress (dithiothreitol, beta-mercaptoethanol, and tunicamycin). Neither AtIRE1-2 nor AtbZIP60 appe…	PDI-LIKE 1-1 (PDIL1-1)	ARABIDOPSIS THALIANA PROTEIN DISULFIDE ISOMERASE 5 (ATPDI5);PROTEIN DISULFIDE ISOMERASE 5 (PDI5);PDI-LIKE 1-1 (PDIL1-1);PDI-LIKE 1-1 (ATPDIL1-1)	S	158	-1.27145	-0.060873	-3.26856	-0.319824	-1.1101	-1.31864	-0.439398	-3.14008	-1.3396	-1.31301	-3.56933	-0.126661	-2.36047	-0.64341	-0.267548	-0.2649	-0.751593	2	___1							0.991014	0.000103287	95.502	45.461	85.731	2.0285	231620000	158	0.779601	0.271876	0.292713	0.627008	-0.458539	-0.517302	0.399563	-0.802164	-0.920464	AT1G21750.1;AT1G21750.2	158;158
AT1G22060	sporulation-specific protein;(source:Araport11)	0	0	S	252	-0.466587	-3.47075	-3.28816	-2.6797	-3.85731	-1.18124	-0.957319	-0.380217	0.369889	-0.476906	-0.367931	-0.840391	-0.820932	-0.184116	-0.590828	-2.74887	-0.258799	2	___1							0.999996	2.241e-20	174.02	153.15	173.51	1.2833	285970000	252	0.427447	-0.88228	-0.850948	0.341823	-0.978874	-1.04994	0.276778	-1.2768	-1.22025	AT1G22060.2;AT1G22060.1	252;252
AT1G22060	sporulation-specific protein;(source:Araport11)	0	0	S	261	0.670389	0.402199	0.0968781	-2.96709	-0.392708	-0.603119	0.593735	-0.0524826	0.5437	-2.86593	0.707487	-0.904482	-1.01273	0.033802	1.43174	0.830784	-3.87623	2	___1							1	4.41739e-20	174.02	153.15	165.16	1.7095	594970000	261	0.718017	-0.335763	-0.378604	0.271466	0.51416	1.23567	0.961078	0.0884946	0.0512929	AT1G22060.2;AT1G22060.1	261;261
AT1G22280	Encodes a phytochrome-associated protein, PAPP2C (phytochrome-associated protein phosphatase type 2C). PAPP2C interacts in the nucleus with phyA (phytochrome A) and phyB. Functions as a regulator of phytochrome-interacting factor PIF3 by dephosphorylating phytochromes in the nucleus.	PHYTOCHROME-ASSOCIATED PROTEIN PHOSPHATASE TYPE 2C (PAPP2C)	PHYTOCHROME-ASSOCIATED PROTEIN PHOSPHATASE TYPE 2C (PAPP2C)	S	124	2.32866	-2.58823	-1.91912	0.953987	2.59776	3.32522	1.56924	2.08578	1.85244	2.21372	2.11306	-2.96821	-1.31234	-2.39414	1.34181	1.46751	1.2877	2	___1			+	Col-0_D_ost1_D			0.89364	9.51875e-23	184.48	156.56	161.82	0.60318	1401500000	124	0.0697509	-2.70068	-2.20365	0.000595169	4.6194	7.68392	0.28027	-1.67185	-1.21025	AT1G22280.3;AT1G22280.1;AT1G22280.2	124;118;118
AT1G22300	Encodes a 14-3-3 protein. This protein is reported to interact with the BZR1 transcription factor involved in brassinosteroid signaling and may affect the nucleocytoplasmic shuttling of BZR1. Might act as a stabilization factor to mediate the oligomerization of REM on the plasma membrane.	GENERAL REGULATORY FACTOR 10 (GRF10)	GENERAL REGULATORY FACTOR 10 (GRF10); (GF14 EPSILON);14-3-3 PROTEIN G-BOX FACTOR14 EPSILON (14-3-3EPSILON)	S	209	-2.59009	-3.10506	-3.20046	-3.52896	2.41689	2.35276	-0.563995	-3.36547	-3.51337	-3.28181	-3.00455	-2.28639	0.0249023	-1.81565	-2.07358	-2.94691	-2.35636	2	___1							0.999992	7.4199e-152	367.28	344.65	206.81	-0.26121	885790000	209	0.0547739	-3.31619	-2.37992	0.407482	1.5691	0.903911	NaN	0	NaN	AT1G22300.1;AT1G22300.2;AT1G22300.3	209;209;209
AT1G22530	PATLs belong to a family of proteins having a Golgi dynamics (GOLD) domain in tandem with the Sec14p-like domain. PATLs are auxin regulated. Quadruple mutants (patl2456) show altered PIN1 lateralization in root endodermis cells.	PATELLIN 2 (PATL2)	PATELLIN 2 (PATL2)	S	79	-3.63258	3.23609	2.71027	3.11101	3.124	-3.78411	-1.87986	-3.8621	-3.01987	-2.98778	-2.74065	-2.55456	-2.9906	-3.03977	-3.69664	-2.76037	-3.18528	3	___1							0.816515	5.91777e-25	180.62	157.29	68.934	1.6276	1574500000	79	0.252973	2.95672	1.26443	0.545319	1.26113	0.648407	0.0695652	4.57029	2.30238	AT1G22530.1;AT1G22530.2	79;79
AT1G22530	PATLs belong to a family of proteins having a Golgi dynamics (GOLD) domain in tandem with the Sec14p-like domain. PATLs are auxin regulated. Quadruple mutants (patl2456) show altered PIN1 lateralization in root endodermis cells.	PATELLIN 2 (PATL2)	PATELLIN 2 (PATL2)	S	403	-0.954985	-0.534403	-0.94334	-0.874083	-3.40222	-2.6218	-2.03595	-0.929207	-0.382066	-3.52238	-1.0691	-2.94169	-1.8363	-0.83074	-4.06541	-3.17041	-4.21165	2	___1	+	Col-0_W_Col-0_D			+	Col-0_W_5A-1_W	0.999987	1.31481e-06	117	92.652	117	-1.4467	132800000	403	0.0365781	1.42059	2.67914	0.656716	-0.377714	-0.472137	0.0001643	2.98912	10.083	AT1G22530.1;AT1G22530.2	403;369
AT1G22620	SAC domain phosphoinositide (3,5)P2 phosphatase. Colocalized with a Golgi Marker. Required for normal cell morphogenesis, cell wall synthesis, and actin organization.	SUPPRESSOR OF ACTIN 1 (SAC1)	SUPPRESSOR OF ACTIN 1 (ATSAC1);SUPPRESSOR OF ACTIN 1 (SAC1)	S	472	1.10794	-2.55607	0.775368	1.29144	-0.246878	-1.0566	0.0847912	0.787849	0.600387	-3.09789	0.702309	-3.54665	0.185534	-3.52862	-3.11101	-3.98917	1.20866	2	___1							1	1.51959e-33	199.1	175.65	146.77	4.4794	518480000	472	0.799291	0.262379	0.265799	0.111182	2.18887	1.93216	0.273323	2.11851	1.23025	AT1G22620.1	472
AT4G09800	encodes a ribosomal protein S18C, a constituent of the small subunit of the ribosomal complex	S18 RIBOSOMAL PROTEIN (RPS18C)	RIBOSOMAL PROTEIN US13X (US13X);S18 RIBOSOMAL PROTEIN (RPS18C)	S	2	-1.68371	-1.33148	-1.48408	-1.24757	1.84845	1.93052	-0.451279	-0.75316	-0.2051	-0.761763	-0.0474091	-1.7214	0.0979347	-0.990499	-1.01241	-0.839426	-0.451387	2	___1	+	Col-0_W_Col-0_D			+	Col-0_W_5A-1_W	1	1.1455e-19	207.39	185.63	40.83	-0.63693	497900000	2	0.0289583	-2.08034	-2.85586	0.176153	1.51496	1.57465	0.013521	-0.66897	-3.73357	AT4G09800.1;AT1G34030.1;AT1G22780.1	2;2;2
AT1G23080	Encodes a novel component of auxin efflux that is located apically in the basal cell and is involved during embryogenesis in setting up the apical-basal axis in the embryo. It is also involved in pattern specification during root development. In roots, it is expressed at lateral and basal membranes of provascular cells in the meristem and elongation zone, whereas in the columella cells it coincid…	PIN-FORMED 7 (PIN7)	ARABIDOPSIS PIN-FORMED 7 (ATPIN7);PIN-FORMED 7 (PIN7)	S	297	-1.18389	-3.15814	-3.66644	-2.863	-3.28692	-3.10357	-3.0406	-3.5888	-0.892219	-1.55038	-1.63338	-3.05293	-2.13873	-2.3988	-2.29232	-1.75585	-1.73109	2	___1			+	Col-0_D_ost1_D			0.950663	1.11745e-151	383.17	341.95	278.07	-0.81278	267590000	297	0.367676	0.537104	0.973991	0.0436118	-0.724815	-2.68398	0.280461	-0.791448	-1.20971	AT1G23080.2;AT1G23080.4;AT1G23080.3;AT1G23080.1	297;297;297;297
AT1G23190	Encodes a cytosolic phosphoglucomutase (PGM). Two Arabidopsis PGM proteins (AT1G70730/PGM2 and AT1G23190/PGM3) have high sequence similarities and redundant functions. Mature plants possessing a single cPGM allele had a major reduction in cPGM activity. Whereas pgm2 and pgm3 single mutants are undistinguishable from the wild type, loss of both PGM2 and PGM3 severely impairs male and female gameto…	PHOSPHOGLUCOMUTASE 3 (PGM3)	PHOSPHOGLUCOMUTASE 3 (PGM3)	S	124	6.62992	7.17245	6.84641	7.51758	7.56631	6.99184	7.55019	7.15819	7.57231	8.34633	7.93244	7.15494	7.79996	7.43155	6.36028	6.66506	7.01039	2	___1							1	2.25863e-112	292.19	271.33	269.41	0.23381	86206000000	124	0.297808	-0.275045	-1.13983	0.556204	-0.145515	-0.630258	0.248596	0.363012	1.30539	AT1G23190.1;AT1G70730.1;AT1G70730.3;AT1G70730.2	123;124;201;144
AT1G23280	MAK16 protein-like protein;(source:Araport11)	0	0	S	247	0.0299606	-0.456476	-0.109251	0.0941906	0.322071	-0.153166	0.595736	1.32099	0.232245	-3.11058	0.993574	1.32104	0.597622	0.910784	0.850948	-0.15933	0.487637	3	___1							1	6.88292e-48	214.31	208.28	193.9	-0.61032	573700000	247	0.105545	-0.631802	-1.90425	0.344952	-0.421743	-1.04247	0.139537	-0.503479	-1.75546	AT1G23280.1	247
AT1G70290	Encodes an enzyme putatively involved in trehalose biosynthesis. Though the protein has both trehalose-6-phosphate synthase (TPS)-like and trehalose-6-phosphate phosphatase (TPP)-like domains, neither activity has been detected in enzymatic assays nor has the protein been able to complement yeast TPS or TPP mutants.	TREHALOSE-6-PHOSPHATASE SYNTHASE S8 (TPS8)	(ATTPS8);TREHALOSE-6-PHOSPHATASE SYNTHASE S8 (TPS8); (ATTPSC)	S	528	-3.62988	-2.78867	-2.77033	-2.81295	-3.0315	-3.26847	-3.51184	-2.50558	-2.86574	-1.92541	-3.14202	-2.25285	-3.04501	-3.42911	-3.68423	-3.31757	-2.87624	2	___1							0.869849	0.00690087	68.893	34.896	68.893	-0.050233	21874000	528	0.80168	0.0788916	0.26255	0.67702	-0.170357	-0.4419	0.397684	0.292222	0.92443	AT1G70290.2;AT1G70290.1;AT1G23870.1	528;566;571
AT1G70290	Encodes an enzyme putatively involved in trehalose biosynthesis. Though the protein has both trehalose-6-phosphate synthase (TPS)-like and trehalose-6-phosphate phosphatase (TPP)-like domains, neither activity has been detected in enzymatic assays nor has the protein been able to complement yeast TPS or TPP mutants.	TREHALOSE-6-PHOSPHATASE SYNTHASE S8 (TPS8)	(ATTPS8);TREHALOSE-6-PHOSPHATASE SYNTHASE S8 (TPS8); (ATTPSC)	S	530	1.41775	-1.94774	-2.37407	-0.153927	0.126261	0.333664	-0.301716	0.619247	1.03213	0.878868	0.708206	-2.55105	0.524139	0.225416	0.211021	0.345257	0	2	___1							0.998469	0.000170757	101.93	78.078	101.93	-0.47571	507420000	530	0.324372	-0.95886	-1.07336	0.392981	0.794861	0.934422	0.400935	-0.949922	-0.917577	AT1G70290.2;AT1G70290.1;AT1G23870.1	530;568;573
AT1G24100	Encodes a UDP-glucose:thiohydroximate S-glucosyltransferase, involved in glucosinolate biosynthesis	UDP-GLUCOSYL TRANSFERASE 74B1 (UGT74B1)	UDP-GLUCOSYL TRANSFERASE 74B1 (UGT74B1)	S	170	-3.96571	-2.44627	-1.97038	-3.08697	-1.16261	-4.29236	-1.34515	-0.654385	-2.81388	-0.90292	-2.97737	-3.42389	-1.04202	-3.54003	-2.56884	-2.6747	-0.814669	2	___1							0.99706	0.000553575	79.346	62.433	79.346	3.1469	81281000	170	0.321485	-1.00371	-1.08035	0.528083	0.805023	0.677639	0.290749	-0.847928	-1.1809	AT1G24100.1	170
AT1G24160	triadin;(source:Araport11)	0	0	S	40	-0.667814	-3.03607	-2.22954	0.0568123	-3.40769	-2.84262	-0.702328	-0.543737	-0.600995	-1.01174	-0.465704	-3.35825	-3.31613	-0.710741	-0.94599	-0.498714	0.0543232	2	___1							0.989927	4.15722e-41	227.46	193.02	225.11	0.87934	176580000	40	0.704572	0.404939	0.397761	0.626593	0.587613	0.517941	0.300542	-1.00569	-1.15432	AT1G24160.2;AT1G24160.1	40;40
AT1G24160	triadin;(source:Araport11)	0	0	S	239	-1.53559	-2.52813	-3.27816	-1.70738	-3.2221	-3.11386	-2.7775	-0.714205	-1.41395	-1.24162	-3.23952	-3.09088	-5.18335	-3.58144	-1.41407	-2.39256	-1.01233	3	___1							0.99999	3.88942e-05	88.571	70.702	88.571	1.0257	66004000	239	0.793975	0.194602	0.273043	0.147973	1.49498	1.70992	0.314064	-0.655992	-1.11883	AT1G24160.2;AT1G24160.1	239;239
AT1G24160	triadin;(source:Araport11)	0	0	S	58	-1.0506	-0.807106	-1.33661	-3.50652	-3.49565	-2.93149	-1.73659	-2.69684	-0.605029	-1.14371	-2.09999	-2.59379	-2.57448	-2.38276	0.0470467	-1.07325	-1.77911	2	___1							1	0.00113062	123.86	74.422	123.86	0.1608	138920000	58	0.19892	1.03994	1.44375	0.66966	-0.198132	-0.452805	0.427724	-0.740106	-0.86272	AT1G24160.2;AT1G24160.1	58;58
AT1G24160	triadin;(source:Araport11)	0	0	S	371	-3.44008	-1.61057	-2.89364	-2.70708	-3.05884	-2.85999	-2.93599	-0.42219	-4.02432	-3.66433	-0.830067	-4.35627	-2.98908	-0.267488	-1.44454	-0.464861	-0.713846	3	___1					+	Col-0_W_5A-1_W	0.802437	0.0176856	43.176	32.673	43.176	0.37824	91932000	371	0.659128	-0.343591	-0.463819	0.868614	0.218363	0.174103	0.017971	-1.78843	-3.46368	AT1G24160.2;AT1G24160.1	371;371
AT1G24180	Arabidopsis thaliana pyruvate dehydrogenase E1a-like subunit. 81% identical to a previously characterized Arabidopsis mitochondrial PDH E1a-subunit, At1g59900. Serine 296 phosphorylation of IAR4 has critical function in root hair formation and root development. Changing Ser296 in IAR4 to Ala resulted in a phenotype intermediate between mutant and wild-type, while substitution to Asp was either le…	IAA-CONJUGATE-RESISTANT 4 (IAR4)	IAA-CONJUGATE-RESISTANT 4 (IAR4)	S	292	1.45269	1.37332	1.01747	1.01991	-0.10915	-1.64221	1.27368	0.981232	1.5099	2.14621	1.19541	1.94178	1.52599	1.37897	0.766838	0.708496	0.597418	2	___1					+	Col-0_W_5A-1_W	0.999163	4.22897e-13	150.12	139.17	148.48	-0.28138	3187700000	292	0.154977	1.08996	1.62646	0.119384	-1.48969	-1.87669	0.0141441	0.52493	3.6901	AT1G24180.1;AT1G59900.1;AT1G59900.2	296;292;292
AT1G24190	Enhances AtERF7-mediated transcriptional repression. RNAi lines show ABA hypersensitivity. Interacts with ERF7 and HDA19.	0	0	S	894	1.48277	1.36475	1.32699	1.65732	1.24039	0.994059	1.97226	-2.40986	1.92885	1.34222	2.01726	1.83098	1.59368	2.01254	1.11631	1.36474	1.7633	3	___1							1	1.34386e-43	214.62	197.82	214.62	-2.0093	1213500000	894	0.342208	1.00874	1.0312	0.292305	-1.36319	-1.17663	0.82045	0.0431744	0.239195	AT1G24190.2;AT1G24190.1;AT1G24190.3	894;898;894
AT1G24267	bZIP transcription factor, putative (DUF1664);(source:Araport11)	0	0	S	330	-3.70195	-2.64905	-2.75691	-3.18438	-3.14126	-3.04262	-3.83498	0.866215	0.768918	1.0821	0.681673	0.709093	-4.03584	-2.87378	-3.0033	0.447741	-3.13073	2	___1							0.928419	6.22913e-39	218.66	199.92	218.66	-0.63977	169350000	330	0.499553	-0.784911	-0.718337	0.9036	-0.221321	-0.127385	0.300784	-1.17764	-1.15367	AT1G24267.1;AT1G24267.2	330;331
AT1G24300	GYF domain-containing protein;(source:Araport11)	0	0	S	1234	-2.35168	-2.36387	-1.8843	-2.77259	-4.08383	-2.00541	-3.06504	-3.34877	-2.77162	-2.04896	-3.02841	-2.93644	-2.06573	-3.59875	-3.64837	-2.8007	-2.96155	2	___1					+	Col-0_W_5A-1_W	1	0.00158997	88.681	62.078	88.681	-0.15276	70703000	1234	0.145085	0.782655	1.67435	0.698534	-0.258786	-0.41036	0.0484352	0.793763	2.59682	AT1G24300.3;AT1G24300.2;AT1G24300.1	1234;1234;1239
AT1G24300	GYF domain-containing protein;(source:Araport11)	0	0	S	33	1.17747	0.729607	0.59691	0.850723	-0.379341	-0.034996	0.978165	0.892406	2.03648	1.18548	1.50882	-1.55453	1.07541	-2.35445	-1.7355	1.41143	-3.24071	2	___1							0.999991	5.40613e-50	230.82	214.7	197.1	2.5684	763900000	33	0.235229	0.47462	1.31914	0.2287	1.30858	1.37104	0.139926	2.02694	1.7533	AT1G24300.3;AT1G24300.2;AT1G24300.1;AT1G27430.2;AT1G27430.3;AT1G27430.1	33;33;33;33;33;33
AT1G24300	GYF domain-containing protein;(source:Araport11)	0	0	S	426	-2.60966	-3.43379	-0.445343	-3.20172	-0.873381	-1.53285	-2.47404	1.24313	0.712169	-3.34247	1.03327	-1.43609	-0.165001	0.942879	-3.72685	-0.257872	-1.16005	3	___1							0.997852	1.98841e-37	190.23	175.1	126.34	-0.46411	263490000	426	0.19686	-1.51334	-1.45143	0.556864	-0.689883	-0.629164	0.57663	-0.707704	-0.596808	AT1G24300.3;AT1G24300.2;AT1G24300.1	426;426;426
AT1G24300	GYF domain-containing protein;(source:Araport11)	0	0	S	1256	3.41384	1.26405	1.09963	1.15583	0.680664	1.68913	2.42639	3.63667	3.31779	2.64183	3.38091	2.81886	3.20773	3.12164	2.20339	2.33174	3.31873	2	___1							1	1.57437e-16	189.07	165.84	188.12	0.33897	2516200000	1256	0.670385	-0.374876	-0.447254	0.261155	-0.941199	-1.26642	0.277697	-0.884616	-1.2176	AT1G24300.3;AT1G24300.2;AT1G24300.1	1256;1256;1261
AT1G24460	Encodes a novel protein that co-immunoprecipitates with SYP41. It is involved in vacuolar trafficking and salt tolerance, potentially via a role in vesicle fusion and in maintaining TGN structure or identity. Mutants display delayed formation of the Brefeldin A (BFA) compartment in cotyledons upon application of BFA.	TGN-LOCALIZED SYP41 INTERACTING PROTEIN (TNO1)	TGN-LOCALIZED SYP41 INTERACTING PROTEIN (TNO1)	S	1612	-0.738174	-1.7552	-2.75833	-2.57022	-0.86116	-2.31501	-1.67753	-0.599728	-0.945586	-3.78089	-0.689497	-1.27868	-3.31501	-1.45716	-2.9663	-1.19791	-1.0425	2	___1							0.99064	4.62554e-06	111.12	89.865	90.685	2.5882	118930000	1612	0.365101	-0.592123	-0.97963	0.402642	0.653591	0.913997	0.781293	-0.219912	-0.293	AT1G24460.2;AT1G24460.1	1612;1687
AT1G24560	Effector molecule of the plant-unique RAB5, ARA6. Acts in the vacuolar/endocytic trafficking pathway with canonical RAB5 and SYP. Promotes recruitment of VSP9a onto the endosome, which is required for efficient RAB5 activation. Colocalizes with RAB5 on endosomes, where it coordinates transport with canonical RAB5.	PLANT-UNIQUE RAB5 EFFECTOR 2 (PUF2)	PLANT-UNIQUE RAB5 EFFECTOR 2 (PUF2);MODIFIED TRANSPORT TO THE VACUOLE 9 (MTV9)	S	12	1.16496	-0.145523	0.0243206	-3.0691	-2.49816	-2.42086	0.95005	1.45675	1.11467	1.58811	1.4502	0.0664463	-2.61882	1.13239	-3.292	-3.1146	0.532242	3	___1							0.998865	3.35311e-08	107.21	102.56	91.729	0.61211	463030000	12	0.933265	0.121717	0.0873111	0.925134	-0.154727	-0.0988022	0.375345	1.45178	0.97277	AT1G24560.1	12
AT1G24706	Encodes a component of the putative Arabidopsis THO/TREX complex: THO1 or HPR1 (At5g09860), THO2 (At1g24706), THO3 or TEX1 (At5g56130), THO5 (At5g42920, At1g45233), THO6 (At2g19430), and THO7 (At5g16790, At3g02950). THO/TREX complexes in animals have been implicated in the transport of mRNA precursors. Mutants of THO3/TEX1, THO1, THO6 accumulate reduced amount of small interfering (si)RNA, sugges…	(THO2)	EMBRYO DEFECTIVE 2793 (EMB2793); (THO2)	S	1308	-3.13449	-3.74464	-3.13915	-2.72372	-0.00901413	-2.10351	-2.64928	-3.20551	-2.6363	-3.02328	-3.85032	-0.657698	0.408133	-1.34895	-2.99331	-2.98593	-4.29736	2	___1							0.989108	9.22233e-09	133.66	109.91	121.79	-0.37719	134010000	1308	0.152729	-1.19367	-1.63708	0.177554	-1.45899	-1.5685	0.610022	0.240031	0.54367	AT1G24706.3;AT1G24706.6;AT1G24706.5;AT1G24706.4;AT1G24706.1;AT1G24706.7;AT1G24706.2;AT1G24706.9;AT1G24706.8	1308;1308;1308;1308;1308;1308;1308;1120;1219
AT1G24706	Encodes a component of the putative Arabidopsis THO/TREX complex: THO1 or HPR1 (At5g09860), THO2 (At1g24706), THO3 or TEX1 (At5g56130), THO5 (At5g42920, At1g45233), THO6 (At2g19430), and THO7 (At5g16790, At3g02950). THO/TREX complexes in animals have been implicated in the transport of mRNA precursors. Mutants of THO3/TEX1, THO1, THO6 accumulate reduced amount of small interfering (si)RNA, sugges…	(THO2)	EMBRYO DEFECTIVE 2793 (EMB2793); (THO2)	S	1646	1.22146	0.636839	0.672293	1.12245	-3.65122	-3.13625	0.5881	1.59977	1.26367	1.20742	1.14639	-1.02419	-3.07787	0.672987	0.418049	0.588379	0.175188	3	___1							1	2.23444e-14	160.47	138.32	160.47	0.053481	1186300000	1646	0.17036	2.06316	1.5575	0.997103	-0.00687691	-0.00381586	0.0521314	0.519389	2.53625	AT1G24706.3;AT1G24706.6;AT1G24706.5;AT1G24706.4;AT1G24706.1;AT1G24706.7;AT1G24706.2;AT1G24706.9;AT1G24706.8	1646;1646;1646;1646;1646;1647;1646;1458;1557
AT1G24764	Member of the MAP70 protein family.	0	0	S	295	0.476158	-0.232035	-0.159094	-0.2906	-0.504293	-0.607069	0.324453	0.606621	0.67526	0.503716	0.470737	-0.439648	0.176022	0.307562	-0.145876	0.0503178	0.343506	2	___1							0.999609	3.21088e-13	162.32	124.98	128.85	-2.5905	483540000	295	0.986167	-0.00632048	-0.0180724	0.888549	-0.0597173	-0.147436	0.603195	-0.134042	-0.554389	AT1G24764.2;AT1G24764.1;AT1G24764.3	295;448;507
AT1G25260	Involved in male gamete development. Trans-acting factor in the assembly of the pre-60S particle; affects ribosome gene expression.	REDUCED POLLEN NUMBER (RDP)	REDUCED POLLEN NUMBER (RDP);REDUCED POLLEN NUMBER 1 (RDP1)	S	230	0.585905	-0.109362	0.0268269	-2.40624	-0.212622	-0.417778	1.08475	1.82842	0.95539	1.18443	1.48218	0.150383	1.6839	1.41242	0.162199	0.584612	1.6371	2	___1							1	4.43062e-66	287.78	274.83	287.78	-0.53537	1189300000	230	0.264546	-1.04641	-1.23054	0.523637	-0.511543	-0.685283	0.201315	-1.27035	-1.47077	AT1G25260.1	230
AT1G26110	Encodes Decapping 5, required for mRNA decapping, P-body formation and translational repression during postembryonic development.	DECAPPING 5 (DCP5)	DECAPPING 5 (DCP5)	S	382	4.01555	2.83617	3.25001	3.63813	2.90202	3.80984	4.25259	4.88231	4.60698	4.38781	4.90231	2.5902	2.7654	4.00431	3.7153	3.11511	4.13734	3	___1							0.998291	4.58537e-42	187.19	180.69	187.19	0.5202	7829400000	382	0.321232	-0.526727	-1.08097	0.230911	0.841722	1.36349	0.594846	-0.220951	-0.567595	AT1G26110.2;AT1G26110.1	382;382
AT1G26110	Encodes Decapping 5, required for mRNA decapping, P-body formation and translational repression during postembryonic development.	DECAPPING 5 (DCP5)	DECAPPING 5 (DCP5)	S	491	-3.83451	-1.45001	-1.34591	-0.662453	3.31964	4.48977	0.886141	-0.87351	-2.1241	-3.10033	-2.69678	0.207779	2.76429	-0.295811	-0.885656	-1.275	-0.965828	2	___1	+	Col-0_W_Col-0_D					0.997788	8.49126e-113	305.12	284.27	305.12	-0.095366	2362100000	491	0.0347242	-3.77873	-2.71823	0.54329	1.06342	0.651815	0.387634	-0.781059	-0.945899	AT1G26110.2;AT1G26110.1	491;497
AT1G26170	Ran effector.	(IMB5)	(IMB5)	S	311	0.862379	0.286276	0.295151	0.536985	0.667681	0.655216	0.955994	0.503208	0.830699	0.311096	0.558018	0.404575	0.210272	0.869177	0.394226	0.290358	-0.0737877	2	___1							1	7.882e-65	245.88	233	245.88	-0.54244	1230000000	311	0.270827	-0.200327	-1.21268	0.357233	0.20085	1.01372	0.203628	0.291599	1.46186	AT1G26170.1	311
AT1G26470	chromatin modification-like protein;(source:Araport11)	SNRK2-SUBSTRATE 1 (SNS1)	SNRK2-SUBSTRATE 1 (SNS1)	S	26	-1.81195	-2.76567	-2.26896	-2.12751	-1.96532	-1.82075	-0.703264	-1.79177	-2.29952	-2.09997	-2.55001	-1.73866	-2.77665	-1.98696	-4.36824	-1.30225	-2.03733	3	___1							0.993812	4.10531e-07	123.53	106.6	66.874	0.76139	98974000	26	0.104859	-0.673247	-1.90896	0.226375	0.597145	1.37905	0.703537	0.325748	0.403094	AT1G26470.1	26
AT1G26630	Eukaryotic translation initiation factor 5A-2. Involved in programmed cell death triggered as a response to pseudomonas syringae infection. Loss of function mutants are more resistant to infection. The mRNA is cell-to-cell mobile.	FUMONISIN B1-RESISTANT12 (FBR12)	FUMONISIN B1-RESISTANT12 (FBR12);EUKARYOTIC ELONGATION FACTOR 5A-2 (ELF5A-2);EUKARYOTIC ELONGATION FACTOR 5A-2 (ATELF5A-2)	S	2	4.80385	4.9776	4.80869	4.92059	2.43894	3.17586	4.06667	4.55588	5.30854	5.20123	4.23614	3.83573	2.64644	4.93611	4.86825	3.971	4.71746	2	___1	+	Col-0_W_Col-0_D					1	2.91816e-47	253.26	189.8	220.6	-0.024092	53416000000	2	0.03148	1.31835	2.79235	0.765819	-0.246755	-0.314531	0.191353	0.358781	1.51031	AT1G26630.1;AT1G26630.2	2;2
AT1G26630	Eukaryotic translation initiation factor 5A-2. Involved in programmed cell death triggered as a response to pseudomonas syringae infection. Loss of function mutants are more resistant to infection. The mRNA is cell-to-cell mobile.	FUMONISIN B1-RESISTANT12 (FBR12)	FUMONISIN B1-RESISTANT12 (FBR12);EUKARYOTIC ELONGATION FACTOR 5A-2 (ELF5A-2);EUKARYOTIC ELONGATION FACTOR 5A-2 (ATELF5A-2)	S	11	-2.91783	-2.43719	-2.24418	-2.94493	2.1569	4.79811	-3.23215	-2.21674	-3.13476	-2.74728	-4.17834	-1.69627	-3.12128	-3.21876	-3.4266	-3.50021	-4.08316	2	___1					+	Col-0_W_5A-1_W	0.999941	9.79764e-40	227.89	186.52	219.95	-0.34358	1592900000	11	0.161934	-3.01257	-1.5945	0.234988	3.0553	1.34973	0.0123246	1.03396	3.82386	AT1G26630.1;AT1G26630.2	11;11
AT1G27030	hypothetical protein;(source:Araport11)	0	0	S	3	-5.14124	-2.65753	-3.1198	-2.84036	-0.499897	-2.84729	-1.09966	-2.56976	-3.33056	-2.27432	-3.36482	-3.54244	1.46005	-1.02608	-1.74301	-2.75506	-2.7859	3	___1							1	2.94673e-22	177.6	165.58	177.6	0.043175	352230000	3	0.0819764	-1.68558	-2.08666	0.625596	-0.717996	-0.519478	0.228923	-1.01174	-1.37027	AT1G27030.1	3
AT1G27030	hypothetical protein;(source:Araport11)	0	0	S	10	-1.83239	-3.02491	-2.62024	-3.42076	0.450821	2.43024	1.34319	0.648947	-1.48256	-1.71889	-3.39199	-1.96931	-0.0578575	-2.93647	-2.17842	-3.34138	-2.62456	2	___1	+	Col-0_W_Col-0_D	+	Col-0_D_ost1_D			0.848881	1.30655e-76	259.2	250.18	236.11	-0.4416	773250000	10	0.000415115	-3.94288	-7.02579	0.0226466	2.87284	3.25196	0.984875	-0.00979153	-0.0199237	AT1G27030.1	10
AT1G27030	hypothetical protein;(source:Araport11)	0	0	S	11	-0.808052	1.29706	-2.0855	-3.14747	4.09922	-2.57664	0.0628815	2.64869	2.01438	-3.1374	-3.20522	2.49799	3.7189	-2.48567	-2.46885	1.62991	1.64452	2	___1							0.970224	1.30655e-76	259.2	250.18	185.33	0.12641	2247400000	11	0.24807	-2.24452	-1.27919	0.940399	-0.185204	-0.0786009	0.407587	-1.45451	-0.903693	AT1G27030.1	11
AT1G27090	glycine-rich protein;(source:Araport11)	0	0	S	7	-0.396776	-3.28212	-3.94136	-2.93129	-3.34262	-2.22116	-4.38548	-2.84952	0.108962	-3.32314	0.662563	-2.33158	-3.23009	-0.583424	-3.6104	0.176275	0.135147	3	___1							0.9722	5.93586e-16	162.46	146.92	113.17	-0.61733	376770000	7	0.555637	0.561808	0.623929	0.231496	-1.15133	-1.3615	0.320381	-1.53823	-1.1027	AT1G27090.1	7
AT1G27090	glycine-rich protein;(source:Araport11)	0	0	S	289	-0.98847	-0.785498	-0.535145	-1.27258	-3.52576	-3.96213	-2.42797	-1.77811	-0.935714	-0.286825	-1.25458	-3.81067	-3.10417	-1.89168	-1.58415	-1.94005	-1.08139	2	___1	+	Col-0_W_Col-0_D					1	5.11913e-10	142.19	126.07	142.19	-1.0942	390160000	289	0.0082444	2.02807	3.87224	0.987914	0.0120161	0.0159204	0.0700483	0.639771	2.29684	AT1G27090.1	289
AT1G27100	Actin cross-linking protein;(source:Araport11)	0	0	S	411	-4.01887	-0.233702	-0.778967	-1.41781	-3.24922	-2.66449	-2.97367	-2.84247	-3.66257	-4.55251	-2.55074	-3.34396	-4.70519	-2.39159	-1.47178	-3.1995	-2.68444	2	___1							0.989222	0.00132871	75.669	48.531	75.669	0.60752	85734000	411	0.170052	1.32012	1.55883	0.388513	0.547783	0.944003	0.472101	0.839568	0.777368	AT1G27100.1	411
AT1G27190	Activated by TCP8/14/15/22, involved in modulation of GA-dependent stamen filament elongation.	BAK1-INTERACTING RECEPTOR-LIKE KINASE 3 (BIR3)	BAK1-INTERACTING RECEPTOR-LIKE KINASE 3 (BIR3)	S	586	0.270035	0.999308	0.390499	0.367058	-1.21634	-1.28679	-0.701469	-0.699427	0.60386	-0.48448	-0.0553818	-4.01993	-1.78488	0.366035	0.409172	0.654169	0.876396	2	___1	+	Col-0_W_Col-0_D					1	1.93137e-39	224.33	206.41	211.7	0.63004	586180000	586	0.000668222	1.48273	6.43102	0.471907	0.836917	0.777728	0.564467	-0.139854	-0.616633	AT1G27190.1	586
AT1G27430	GYF domain-containing protein;(source:Araport11)	0	0	S	426	1.84917	0.692101	0.974087	0.974432	-2.39433	-3.57982	1.7332	1.91148	1.81438	1.78534	1.7647	1.67153	1.43047	1.76769	1.07495	1.07177	1.69658	3	___1							0.998269	2.27437e-72	241.02	178.92	241.02	0.066433	981990000	426	0.278796	1.70481	1.19054	0.243852	-2.2056	-1.32059	0.664303	-0.158655	-0.460781	AT1G27430.2;AT1G27430.3;AT1G27430.1	426;426;426
AT1G27430	GYF domain-containing protein;(source:Araport11)	0	0	S	722	-2.86793	-2.44065	-3.66649	-2.32195	-0.755934	-0.897738	-2.60565	-2.53786	-3.11466	-2.26497	-3.31207	-1.49083	-0.78089	-3.06487	-3.55807	-1.69279	-3.55395	3	___1							0.999937	0.00057989	73.11	62.914	73.11	0.17446	127870000	722	0.104874	-1.12496	-1.90885	0.926635	0.0795691	0.096814	NaN	0	NaN	AT1G27430.2;AT1G27430.3;AT1G27430.1	722;722;722
AT1G27430	GYF domain-containing protein;(source:Araport11)	0	0	S	584	-0.437927	-1.22635	-0.812159	-0.958689	-3.2781	-3.32078	-0.808157	-0.456879	-0.366462	-0.485878	-0.718229	-0.0322742	1.12448	-3.31304	-0.816042	-1.12461	-0.944931	2	___1							0.999184	3.06112e-20	170.49	130.57	170.49	-0.58498	239250000	584	0.210883	1.1072	1.40056	0.433519	-1.2257	-0.851205	0.641895	0.10308	0.494526	AT1G27430.2;AT1G27430.3;AT1G27430.1	584;584;584
AT1G27430	GYF domain-containing protein;(source:Araport11)	0	0	S	1005	-2.34337	0.36278	0.762365	1.34606	-3.63808	-3.79984	-1.98978	-2.9054	-2.55775	-2.63961	-4.01241	-3.0662	-3.20268	-3.27051	-2.2612	-3.31257	-3.89422	4	___1	+	Col-0_W_Col-0_D			+	Col-0_W_5A-1_W	0.992005	1.66818e-07	85.239	64.072	85.239	0.077941	210450000	1005	0.0144555	3.11524	3.40227	NaN	0	NaN	0.0285182	3.18796	3.04711	AT1G27430.2;AT1G27430.3;AT1G27430.1	1005;1005;1005
AT1G27460	encodes a calmodulin-binding protein that is expressed in pollen, suspension culture cells, flowers, and fruits. The mRNA is cell-to-cell mobile.	NO POLLEN GERMINATION RELATED 1 (NPGR1)	NO POLLEN GERMINATION RELATED 1 (NPGR1)	S	18	-0.992109	-1.60845	-1.40961	-4.00201	-3.80322	-2.95718	-2.60742	-3.39045	-1.81746	-2.91179	-0.258566	-2.63729	-2.43068	-1.16333	-2.62771	-2.2333	-0.809883	2	___1							0.922221	0.00583028	63.894	48.003	63.894	2.8965	82351000	18	0.153599	1.18652	1.63295	0.0736905	-1.11246	-2.25632	0.90786	-0.11275	-0.121722	AT1G27460.2;AT1G27460.3;AT1G27460.1	18;18;18
AT1G27595	Encodes a protein of unknown function containing a Symplekin C domain that is involved in negative regulation of glucose response. Mutants show increased sensitivity to glucose with a variety of assays.	(TANG1)	(TANG1)	S	640	1.0218	0.860235	1.1632	0.790827	-3.40785	-2.65942	0.980719	1.6099	1.50061	1.59803	1.71157	1.13189	0.713879	1.45078	0.656332	1.25567	1.52516	3	___1							0.999984	6.28236e-24	165.47	147.07	153.14	-0.34274	1527000000	640	0.199529	1.82818	1.4415	0.248694	-1.96801	-1.30508	0.465545	-0.186703	-0.78959	AT1G27595.1	640
AT1G27730	Related to Cys2/His2-type zinc-finger proteins found in higher plants. Compensated for a subset of calcineurin deficiency in yeast. Salt tolerance produced by ZAT10 appeared to be partially dependent on ENA1/PMR2, a P-type ATPase required for Li+ and Na+ efflux in yeast. The protein is localized to the nucleus, acts as a transcriptional repressor and is responsive to chitin oligomers. Also involv…	SALT TOLERANCE ZINC FINGER (STZ)	(ZAT10);SALT TOLERANCE ZINC FINGER (STZ)	S	8	-0.351547	-2.93138	-2.90957	-2.8026	0.407797	-0.128084	-0.288246	-2.25527	-0.090064	-0.736572	-0.932751	-0.607641	1.14155	-1.83027	-1.00503	-3.28971	-3.31177	2	___1							0.997602	3.66376e-05	155	114.01	155	1.364	249080000	8	0.0981997	-1.68282	-1.95628	0.89853	-0.133831	-0.134133	0.782747	0.286729	0.290985	AT1G27730.1	8
AT1G27850	Encodes a microtubule-associated protein involved in cortical microtubule organization during leaf development.	BASIC PROLINE-RICH PROTEIN5 (BPP5)	BASIC PROLINE-RICH PROTEIN5 (BPP5)	S	25	-1.07233	-2.76056	-0.730844	-0.673349	-3.01865	-3.32047	-0.25017	-0.137611	0.0501146	-0.477852	-0.315533	-0.182823	-0.886133	0.706509	-2.85813	0.170284	-3.75149	2	___1							1	1.10418e-09	170.04	151.82	170.04	-1.1727	236050000	25	0.720225	0.372454	0.375473	0.211501	-1.56091	-1.43225	0.499555	0.837175	0.727479	AT1G27850.1	25
AT1G27850	Encodes a microtubule-associated protein involved in cortical microtubule organization during leaf development.	BASIC PROLINE-RICH PROTEIN5 (BPP5)	BASIC PROLINE-RICH PROTEIN5 (BPP5)	S	906	1.08681	0.50597	0.407845	0.24785	-0.913933	-1.49063	1.07997	1.88814	1.52294	0.686192	1.12205	0.857111	0.603104	1.7135	0.862959	0.769415	1.00847	3	___1							0.999426	1.30659e-15	148.09	135.05	117.36	-0.80892	741290000	906	0.626693	0.421231	0.512382	0.396428	-0.917017	-0.927088	0.214719	-0.318165	-1.42045	AT1G27850.1	906
AT1G27910	Encodes a protein containing a UND, a U-box, and an ARM domain. This protein has E3 ubiquitin ligase activity based on in vitro assays.	PLANT U-BOX 45 (PUB45)	PLANT U-BOX 45 (PUB45);ARABIDOPSIS THALIANA PLANT U-BOX 45 (ATPUB45)	S	261	-1.84688	-2.07391	-2.20144	-3.8248	-3.7738	-2.95872	-2.88453	-1.5054	-1.82248	-1.16047	-1.62775	-3.28363	-1.77693	-1.43289	-2.79511	-2.35103	-3.58275	2	___1							0.993497	0.00712564	78.334	78.334	53.775	0.65403	63910000	261	0.668201	0.293856	0.450456	0.438358	-0.616128	-0.84168	0.521553	0.422874	0.688882	AT1G27910.1	261
AT1G28280	VQ motif-containing protein;(source:Araport11)	MPK3/6-TARGETED VQP 1 (MVQ1)	MPK3/6-TARGETED VQP 1 (MVQ1)	S	16	-0.546259	-0.672504	-0.910297	-1.41284	-3.66892	-3.60642	-2.84487	-1.83792	0.021678	-0.515867	-1.01071	-2.98215	-3.15788	-2.45675	-2.3405	-0.905073	-0.950497	2	___1	+	Col-0_W_Col-0_D					1	1.48808e-05	124.12	94.957	124.12	-1.2759	151080000	16	0.00412254	2.10406	4.49575	0.826049	-0.123943	-0.231572	0.310075	0.513214	1.12916	AT1G28280.2;AT1G28280.1	16;16
AT1G28280	VQ motif-containing protein;(source:Araport11)	MPK3/6-TARGETED VQP 1 (MVQ1)	MPK3/6-TARGETED VQP 1 (MVQ1)	S	152	-0.358738	0.112471	-3.09412	-2.25015	-2.28338	-3.39532	-1.17506	-3.87064	0.155175	-0.665499	-0.237501	-2.91707	-3.73455	-4.25383	-0.220778	-0.273609	0.236317	2	___1							0.843953	6.26325e-10	139.04	116.51	139.04	-0.093748	183690000	152	0.234429	1.28347	1.32169	0.27759	0.954048	1.21791	0.209703	-1.31161	-1.43892	AT1G28280.2;AT1G28280.1	152;152
AT1G28280	VQ motif-containing protein;(source:Araport11)	MPK3/6-TARGETED VQP 1 (MVQ1)	MPK3/6-TARGETED VQP 1 (MVQ1)	S	235	-0.606359	-0.240276	-0.681528	-4.16066	-2.94168	-2.69185	-2.10669	-1.35731	0.241366	-0.250429	0.0518913	-1.77084	-3.70645	-1.14754	0.0476189	0.0329208	0.228725	2	___1							0.86103	6.99804e-08	140.24	119.34	140.24	-0.62561	228850000	235	0.41937	0.852176	0.866781	0.934711	-0.0661038	-0.086123	0.219624	-1.52529	-1.40278	AT1G28280.2;AT1G28280.1	235;235
AT1G28330	dormancy-associated protein (DRM1)	DORMANCY-ASSOCIATED PROTEIN-LIKE 1 (DYL1)	DORMANCY-ASSOCIATED PROTEIN 1 (DRM1);DORMANCY-ASSOCIATED PROTEIN-LIKE 1 (DYL1); (ATDRM1)	S	105	-2.20326	-3.07394	-3.11836	-2.6254	1.67111	1.25988	-0.968533	-2.45877	-2.73262	-3.01405	-2.85205	-3.10173	1.20457	-1.72189	-3.34961	-3.21427	-3.30606	3	___1	+	Col-0_W_Col-0_D					0.959919	9.66865e-78	247.36	228.98	123.75	0.069648	302020000	105	0.038182	-2.63116	-2.64699	0.519816	1.08227	0.691888	0.0916295	0.534742	2.08371	AT1G28330.3;AT1G28330.2	105;105
AT1G28380	This gene is predicted to encode a protein involved in negatively regulating salicylic acid-related defense responses and cell death programs. nsl1 mutants develop necrotic lesions spontaneously and show other features of a defense response, such as higher levels of SA and disease resistance-related transcripts, in the absence of a biotic stimulus. The NSL1 protein is predicted to have a MACPF do…	NECROTIC SPOTTED LESIONS 1 (NSL1)	NECROTIC SPOTTED LESIONS 1 (NSL1)	S	228	-0.328983	-2.89761	-1.21629	-1.09888	-2.96102	-3.1719	-3.24499	-0.801889	-1.04225	-3.4079	-0.741514	-2.20683	-2.39439	-2.926	-1.31646	-2.19822	-1.26467	2	___1							0.949619	0.000123247	98.062	77.673	98.062	0.73699	340000000	228	0.195583	1.15951	1.45623	0.961888	-0.035873	-0.0502242	0.775101	0.207673	0.301596	AT1G28380.1	228
AT1G28420	homeobox-1;(source:Araport11)	HOMEOBOX-1 (HB-1)	HOMEOBOX-1 (HB-1);RINGLET 1 (RLT1)	S	321	-1.89907	-0.394728	-0.363544	-1.19791	-0.683928	-1.75386	-1.04304	-3.55555	-3.25943	-2.87372	-3.15086	-1.83722	-3.35403	-2.65209	-3.72916	-1.32306	-2.68894	3	___1							0.997344	6.24447e-06	98.326	82.905	98.326	-0.089526	163990000	321	0.321724	0.795283	1.07977	0.35528	0.855349	1.01823	0.0766784	1.61657	2.22465	AT1G28420.1	321
AT1G29060	Encodes a golgi localized QcSNARE involved in response to salt and osmotic stress. Overexpression confers increased resistance to NaCl, mannitol and LiCl. SFT12 may act by mediating vacuolar sequestration of NaCl and other ions.	(ATSFT12)	(ATSFT12)	S	30	-3.82752	-2.78507	-2.17618	-3.28588	-1.00846	-1.07747	-3.44604	-4.05932	-3.5437	-2.85018	-2.94879	-2.8071	-3.52364	-2.83415	-3.7443	-3.46955	-2.96378	2	___1							0.99998	2.22137e-07	128.68	107.23	128.68	0.98785	50139000	30	0.500914	-0.620837	-0.715966	0.523156	0.657141	0.686112	0.452087	0.373881	0.815082	AT1G29060.1	30
AT1G29060	Encodes a golgi localized QcSNARE involved in response to salt and osmotic stress. Overexpression confers increased resistance to NaCl, mannitol and LiCl. SFT12 may act by mediating vacuolar sequestration of NaCl and other ions.	(ATSFT12)	(ATSFT12)	S	32	-3.91186	-3.24287	-2.86553	-4.16558	0.139551	-0.122124	-3.11576	-3.07322	-3.82245	-3.09431	-2.25738	-2.49498	-2.18698	-3.04191	-2.32878	-2.86187	-3.0986	2	___1							0.999976	7.00401e-06	117.2	89.772	117.2	0.50146	91765000	32	0.0784923	-2.00357	-2.11807	0.384219	1.03173	0.953295	NaN	0	NaN	AT1G29060.1	32
AT1G29350	RNA polymerase II degradation factor-like protein (DUF1296);(source:Araport11)	0	0	S	289	-2.51548	-3.16359	-3.17347	-3.59666	1.85443	0.748425	-0.778166	-3.50067	-3.14142	-3.77559	-2.03786	-2.35394	-0.688583	-1.92904	-3.14733	-3.36704	-3.03361	3	___1							0.886981	5.2307e-09	130.01	91.005	59.912	-0.36543	319600000	289	0.0628547	-2.6933	-2.27936	0.427709	1.23819	0.862749	0.809177	0.0703586	0.254593	AT1G29350.1;AT1G29370.1;AT1G29370.2	289;289;149
AT1G29350	RNA polymerase II degradation factor-like protein (DUF1296);(source:Araport11)	0	0	S	538	-3.1675	-3.19487	-3.56349	-2.23224	0.188547	-0.177464	-2.52076	-2.94385	-3.33759	-3.07191	-4.13238	-2.49206	-0.713781	-2.90671	-3.36123	-3.27942	-3.03126	2	___1							0.998448	2.33342e-115	327.42	294.16	279.19	-0.27336	278510000	538	0.0953197	-1.67614	-1.97776	0.566688	0.674137	0.612994	NaN	0	NaN	AT1G29350.1;AT1G29370.1;AT1G29370.2	538;538;398
AT1G29350	RNA polymerase II degradation factor-like protein (DUF1296);(source:Araport11)	0	0	S	247	-0.626083	-0.735788	-0.0278854	0.423271	2.66844	1.23775	-3.31449	-2.56701	-0.144343	-0.894028	-0.437662	1.05162	2.21094	-0.422058	0.212757	-3.07694	0.591846	2	___1							0.976214	4.07767e-40	217.26	195.42	151.95	-1.9004	1060600000	247	0.869916	0.252204	0.170905	0.46702	-1.44066	-0.786829	0.636473	0.515824	0.502787	AT1G29350.1;AT1G29370.1;AT1G29370.2	247;247;107
AT1G29350	RNA polymerase II degradation factor-like protein (DUF1296);(source:Araport11)	0	0	S	108	-1.17503	-4.20156	-2.96738	-1.68535	-3.00915	1.59257	-0.736349	-1.74703	-1.97822	-2.71274	-2.53235	-0.786797	0.226744	-2.0353	-2.19714	-1.58433	-1.87374	2	___1							0.963799	1.08983e-36	216.35	208.94	216.35	-0.79556	484420000	108	0.244335	-1.53234	-1.29062	0.934711	-0.109873	-0.0861232	0.480613	-0.622261	-0.761683	AT1G29350.1;AT1G29370.1	108;108
AT1G29370	RNA polymerase II degradation factor-like protein (DUF1296);(source:Araport11)	0	0	S	267	-1.16276	-1.39438	-1.06826	-3.27628	-1.46155	-2.75925	-0.111681	-0.420238	-0.963073	-0.437887	-0.645611	-2.93102	-3.84404	-4.01742	-3.93698	-3.22132	-3.06574	2	___1			+	Col-0_D_ost1_D			0.999898	0.00239804	72.417	55.339	72.417	1.6525	137330000	267	0.52358	-0.53724	-0.677093	0.0250073	2.40932	3.16312	0.0504802	1.6826	2.56271	AT1G29370.1;AT1G29370.2	267;127
AT1G29400	A member of mei2-like gene family, predominantly plant-based family of genes encoding RNA binding proteins with characteristic presence of a highly conserved RNA binding motif first described in the mei2 gene of the fission yeast S. pombe. In silico analyses reveal nine mei2 -like genes in A. thaliana. They were grouped into four distinct clades, based on overall sequence similarity and subfamily…	MEI2-LIKE PROTEIN 5 (ML5)	MEI2-LIKE PROTEIN 5 (AML5);MEI2-LIKE PROTEIN 5 (ML5)	S	33	0.0318356	-2.50543	-2.71723	-2.45185	-3.33708	-4.19679	-3.51424	-3.79993	0.271272	1.43659	-2.26484	-1.76556	-3.37765	-3.42437	-3.79711	-3.24733	-3.36554	3	___1	+	Col-0_W_Col-0_D					0.891127	5.53374e-06	105.16	88.48	105.16	-0.68109	80059000	33	0.0374003	1.80134	2.66247	NaN	0	NaN	0.10263	1.55932	1.99471	AT1G29400.3;AT1G29400.2;AT1G29400.1	33;33;33
AT1G29400	A member of mei2-like gene family, predominantly plant-based family of genes encoding RNA binding proteins with characteristic presence of a highly conserved RNA binding motif first described in the mei2 gene of the fission yeast S. pombe. In silico analyses reveal nine mei2 -like genes in A. thaliana. They were grouped into four distinct clades, based on overall sequence similarity and subfamily…	MEI2-LIKE PROTEIN 5 (ML5)	MEI2-LIKE PROTEIN 5 (AML5);MEI2-LIKE PROTEIN 5 (ML5)	S	34	-1.24141	-0.950014	-1.93058	-3.07599	-3.61662	-4.62906	-3.89417	-0.39072	-2.96836	-3.34254	-2.99099	-3.10855	-3.02248	-1.22624	-4.13127	-2.71261	-3.42193	4	___1							0.834175	8.34044e-16	159.74	145.13	109.03	0.052429	158430000	34	0.251564	1.33314	1.26864	0.602192	-0.680217	-0.55597	0.0562461	1.62244	2.47411	AT1G29400.3;AT1G29400.2;AT1G29400.1	34;34;34
AT1G29400	A member of mei2-like gene family, predominantly plant-based family of genes encoding RNA binding proteins with characteristic presence of a highly conserved RNA binding motif first described in the mei2 gene of the fission yeast S. pombe. In silico analyses reveal nine mei2 -like genes in A. thaliana. They were grouped into four distinct clades, based on overall sequence similarity and subfamily…	MEI2-LIKE PROTEIN 5 (ML5)	MEI2-LIKE PROTEIN 5 (AML5);MEI2-LIKE PROTEIN 5 (ML5)	S	792	-0.449995	-1.15141	-0.577297	-1.11627	-1.7909	-1.98381	-0.939737	-2.24921	-3.04444	-2.13645	-4.24008	-1.86486	-2.4412	-1.4089	-0.426493	-0.233845	-1.4654	3	___1	+	Col-0_W_Col-0_D					0.992791	4.30365e-14	157.42	133.23	143.95	-0.6789	790530000	792	0.034217	0.91717	2.72932	0.710791	0.164072	0.392603	0.776924	-0.115165	-0.299062	AT1G29400.3;AT1G29400.2;AT1G29400.1	792;792;792
AT1G29400	A member of mei2-like gene family, predominantly plant-based family of genes encoding RNA binding proteins with characteristic presence of a highly conserved RNA binding motif first described in the mei2 gene of the fission yeast S. pombe. In silico analyses reveal nine mei2 -like genes in A. thaliana. They were grouped into four distinct clades, based on overall sequence similarity and subfamily…	MEI2-LIKE PROTEIN 5 (ML5)	MEI2-LIKE PROTEIN 5 (AML5);MEI2-LIKE PROTEIN 5 (ML5)	S	390	0.130354	-1.84823	-3.13744	-0.852341	-2.6201	-1.95024	-2.6083	-0.571884	-1.25987	-0.357399	-0.770164	-3.03963	-2.318	-3.29071	-3.21156	-2.67054	-0.754145	2	___1							0.925002	5.95135e-06	134.56	100.67	84.297	-0.0089478	187800000	390	0.569271	0.510717	0.601899	0.187693	0.94515	1.52534	0.482549	0.785167	0.758143	AT1G29400.3;AT1G29400.2;AT1G29400.1	390;390;390
AT1G29530	hypothetical protein;(source:Araport11)	0	0	S	44	0.80645	-2.23535	-0.622982	-0.488861	-2.81157	0.848923	0.783756	0.0156803	0.693955	1.46122	-3.72561	-0.49641	0.654758	-0.0126266	-0.102262	-0.680189	-0.579546	2	___1							0.992514	1.32253e-39	203.59	167.25	173.37	-0.76051	417100000	44	0.756976	-0.344383	-0.323942	0.761064	-0.339376	-0.321181	0.819241	-0.181186	-0.240843	AT1G29530.1	44
AT1G29530	hypothetical protein;(source:Araport11)	0	0	S	202	-2.89927	0.230795	-1.0248	-1.0117	-4.03886	-3.29599	-3.0254	-2.68947	-0.487208	-3.09984	-4.46893	-0.493965	0.365009	0.650759	-0.872826	0.260204	-3.5821	3	___1	+	Col-0_W_Col-0_D	+	Col-0_D_ost1_D			0.998469	0.0024877	57.278	52.728	57.278	0.90687	208760000	202	0.0254965	2.08619	2.95351	0.000582373	-3.43637	-7.7198	0.862951	0.221997	0.181704	AT1G29530.1	202
AT1G29530	hypothetical protein;(source:Araport11)	0	0	S	142	-3.31326	-2.67427	-2.97951	-2.80497	0.739016	-0.00310326	-1.517	-3.04738	-2.85353	-3.61989	-3.74382	-2.56499	-3.91639	-2.74511	-2.60212	-2.59152	-3.50797	2	___1							0.999999	0.00206064	82.102	42.185	82.102	3.7512	128360000	142	0.0584496	-1.98588	-2.33239	0.100997	2.11838	2.00727	0.893764	-0.0424647	-0.140481	AT1G29530.1	142
AT1G29930	Subunit of light-harvesting complex II (LHCII),which absorbs light and transfers energy to the photosynthetic reaction center. The mRNA is cell-to-cell mobile.	CHLOROPHYLL A/B BINDING PROTEIN 1 (CAB1)	CHLOROPHYLL A/B BINDING PROTEIN 1 (CAB1); (AB140);CHLOROPHYLL A/B PROTEIN 140 (CAB140);LIGHT-HARVESTING CHLOROPHYLL A/B-PROTEIN 1.3 (LHCB1.3);CELLULOSE SYNTHASE LIKE C8 (CLSC8)	S	44	-0.189056	-0.353872	-1.10066	-1.04992	-2.63633	-3.88312	-0.557137	-0.291759	-0.155162	0.177383	-0.732574	-0.396618	-0.473104	-0.272684	-0.783014	-3.99801	-3.58476	2	___1							0.999895	1.57766e-08	128.68	108.35	102.87	0.11971	225850000	44	0.237268	1.16871	1.31267	0.210397	-1.46128	-1.43634	0.0632973	2.11521	2.37831	AT1G29930.1;AT1G29920.1;AT1G29910.1;AT2G34420.1	46;46;46;44
AT1G29930	Subunit of light-harvesting complex II (LHCII),which absorbs light and transfers energy to the photosynthetic reaction center. The mRNA is cell-to-cell mobile.	CHLOROPHYLL A/B BINDING PROTEIN 1 (CAB1)	CHLOROPHYLL A/B BINDING PROTEIN 1 (CAB1); (AB140);CHLOROPHYLL A/B PROTEIN 140 (CAB140);LIGHT-HARVESTING CHLOROPHYLL A/B-PROTEIN 1.3 (LHCB1.3);CELLULOSE SYNTHASE LIKE C8 (CLSC8)	S	46	2.6943	3.27042	2.94551	2.72135	-0.258909	-0.754515	0.0506649	1.26482	3.77949	3.86027	3.09509	-0.177116	-0.219313	1.08721	2.99185	2.84385	2.46476	2	___1	+	Col-0_W_Col-0_D					1	6.67171e-21	217.91	192.21	201.48	-0.25742	2364300000	46	0.000748496	2.83238	6.29534	0.813479	-0.154746	-0.248708	0.522443	0.141073	0.687343	AT1G29930.1;AT1G29920.1;AT1G29910.1;AT2G34420.1	48;48;48;46
AT1G29930	Subunit of light-harvesting complex II (LHCII),which absorbs light and transfers energy to the photosynthetic reaction center. The mRNA is cell-to-cell mobile.	CHLOROPHYLL A/B BINDING PROTEIN 1 (CAB1)	CHLOROPHYLL A/B BINDING PROTEIN 1 (CAB1); (AB140);CHLOROPHYLL A/B PROTEIN 140 (CAB140);LIGHT-HARVESTING CHLOROPHYLL A/B-PROTEIN 1.3 (LHCB1.3);CELLULOSE SYNTHASE LIKE C8 (CLSC8)	S	51	1.48514	1.58229	1.13519	0.929306	-3.66078	-2.41004	1.36306	1.22531	1.33714	1.48772	0.924381	1.78375	-3.81847	1.43799	1.06524	1.19928	0.501492	2	___1							1	1.9156e-22	185.67	169.32	150.11	0.15588	931350000	51	0.144763	2.15359	1.67596	0.766271	-0.671703	-0.3139	0.214036	0.360975	1.42294	AT1G29930.1;AT1G29920.1;AT1G29910.1;AT2G34420.1	53;53;53;51
AT1G30280	Chaperone DnaJ-domain superfamily protein;(source:Araport11)	AUXILIN-LIKE7 (AUXILIN-LIKE7)	AUXILIN-LIKE7 (AUXILIN-LIKE7)	S	50	-3.04693	-2.84505	-2.45551	-3.66901	-2.90771	-3.35913	-3.37129	-3.9438	-2.54544	-2.33994	-3.14777	-3.48203	-3.37072	-2.92906	-2.88027	-3.04737	-3.56501	2	___1							0.997879	0.0271377	60.102	15.688	60.102	-0.50016	38453000	50	0.281118	0.39136	1.18419	0.659386	-0.134879	-0.468133	0.662867	0.160092	0.462926	AT1G30280.3;AT1G30280.2;AT1G30280.1	50;50;50
AT1G30440	Phototropic-responsive NPH3 family protein;(source:Araport11)	0	0	S	279	1.63097	1.52655	1.0957	1.44398	0.4245	0.511086	0.670387	1.64113	1.99983	1.99721	2.30586	0.309231	-3.68345	1.71049	1.52121	1.88058	1.82904	2	___1							1	1.91607e-41	232.15	218.4	232.15	0.56908	1327500000	279	0.0906269	0.612525	2.01419	0.371469	1.36635	0.981392	0.112922	-0.319308	-1.92004	AT1G30440.1	279
AT1G30440	Phototropic-responsive NPH3 family protein;(source:Araport11)	0	0	S	532	-0.0993748	-3.6125	-3.50933	-2.37024	-3.36836	-3.32442	-2.47297	0.0989704	0.0293036	-0.197454	-0.368069	-3.21079	-1.41703	-2.46724	-3.20346	-0.358732	-2.8791	3	___1							0.999721	5.57974e-10	124.82	111.63	101.3	0.36999	208110000	532	0.913174	-0.131166	-0.113714	0.929569	0.0983246	0.0929281	0.84577	-0.250762	-0.204847	AT1G30440.1	532
AT1G30450	member of Cation-chloride co-transporter family	CATION-CHLORIDE CO-TRANSPORTER 1 (CCC1)	CATION-CHLORIDE CO-TRANSPORTER 1 (CCC1); (ATCCC1);HAPLESS 5 (HAP5)	S	111	-3.14945	1.02779	0.711246	0.895031	0.153839	-1.53757	0.0933552	-0.21472	-1.05721	-2.74247	-1.52954	0.174583	-1.12078	-3.31326	0.249372	0.173723	-0.389355	4	___1							0.824434	3.7877e-71	225.51	214.5	225.51	1.4725	1155600000	111	0.826978	0.247427	0.228322	0.331917	1.04354	1.07395	0.912019	-0.140094	-0.116197	AT1G30450.3;AT1G30450.2;AT1G30450.1	111;111;111
AT1G30470	SIT4 phosphatase-associated family protein;(source:Araport11)	0	0	S	696	0.530966	-0.532682	0.148083	0.00774574	-3.58855	2.75801	1.65052	0.420803	0.20082	1.70761	1.14697	0.4042	2.45436	-0.285593	-2.92708	-0.429739	0.625446	2	___1							0.99983	1.77347e-38	248.06	207.59	248.06	-0.71008	1936100000	696	0.852733	-0.271669	-0.193792	0.770429	-0.547457	-0.308099	0.349099	0.948985	1.03266	AT1G30470.3;AT1G30470.2;AT1G30470.1	696;733;739
AT1G30470	SIT4 phosphatase-associated family protein;(source:Araport11)	0	0	S	466	3.24824	3.25716	3.13662	3.70501	3.4539	3.15072	4.13965	3.62563	3.64502	2.69909	3.72818	3.12251	2.92237	3.90622	3.37765	3.35054	3.87163	3	___1							0.999986	1.65094e-77	243.58	217.37	243.58	-0.79114	7428400000	466	0.33194	-0.255717	-1.05525	0.468059	0.275441	0.784889	0.382815	-0.196518	-0.956351	AT1G30470.3;AT1G30470.2;AT1G30470.1	466;503;509
AT1G30630	Member of the Coat Protein I (COPI) complex is a seven-subunit coatomer complex consisting of the &#945;, &#946;, &#946;&#8242;, &#947;, &#948;, &#949;, and &#950; proteins. COPI is required for retrograde transport from the Golgi to the endoplasmic reticulum, Golgi maintenance, and cell plate formation.	EPSILON1 COAT PROTEIN (epsilon1-COP)	EPSILON1 COAT PROTEIN (epsilon1-COP)	S	279	-2.94045	-3.42198	-1.9578	-2.17655	-1.22808	-1.2753	-2.57785	-4.09151	-3.11961	-2.06499	-3.40794	-3.5735	-4.0174	-3.40201	-5.33692	-3.72053	-3.23677	2	___1							1	0.000619426	88.075	69.45	88.075	0.19167	37717000	279	0.676996	-0.331012	-0.437589	0.153148	1.37112	1.68325	0.0777549	1.47388	2.21357	AT1G30630.1	279
AT1G30640	Ubiquitously expressed protein kinase.	NUCLEAR DBF2-RELATED 7 (NDR7)	NUCLEAR DBF2-RELATED 7 (NDR7)	S	229	-0.831057	-1.29764	-3.0517	-3.25803	-3.96445	-2.81078	-3.27224	0.249399	-0.985614	-1.39614	-0.854143	-2.92491	-0.354736	-2.48912	-3.41256	-3.2941	-4.11556	2	___1							0.984308	9.34796e-08	124.29	114.15	115.98	1.246	79167000	229	0.770541	0.33991	0.305177	0.699087	-0.526595	-0.409557	0.104305	1.4978	1.98205	AT1G30640.3;AT1G30640.2;AT1G30640.1	229;322;322
AT1G30690	Sec14p-like phosphatidylinositol transfer family protein;(source:Araport11)	(PATL4)	(PATL4)	S	53	4.5921	3.87599	3.33404	4.03426	2.67986	2.00058	4.35999	5.47178	5.32898	3.7474	5.03389	3.06822	3.73074	5.21045	4.45434	4.76844	5.19449	2	___1							0.999689	6.99575e-27	211.29	188.3	211.29	0.091937	9236700000	53	0.704149	0.331042	0.398366	0.74116	-0.375081	-0.349207	0.0627547	-0.846664	-2.38526	AT1G30690.2;AT1G30690.1	53;53
AT1G31440	SH3 domain-containing protein;(source:Araport11)	SH3 DOMAIN-CONTAINING PROTEIN 1 (SH3P1)	SH3 DOMAIN-CONTAINING PROTEIN 1 (SH3P1)	S	264	-0.244366	-0.830042	-0.207598	-0.657671	-3.57751	-3.96902	-3.37878	-1.55368	-3.23201	-2.26553	-3.98648	-0.362457	-0.928967	-0.757017	-0.343668	-0.606911	-1.05377	2	___1	+	Col-0_W_Col-0_D	+	Col-0_D_ost1_D			0.964414	5.19704e-57	271.68	248.96	271.68	-0.80943	706480000	264	0.00324694	2.63483	4.72329	0.0132897	-2.43694	-3.75029	0.498764	0.183198	0.728888	AT1G31440.1	264
AT1G31440	SH3 domain-containing protein;(source:Araport11)	SH3 DOMAIN-CONTAINING PROTEIN 1 (SH3P1)	SH3 DOMAIN-CONTAINING PROTEIN 1 (SH3P1)	S	267	-0.606359	-1.82746	-3.32758	-0.669012	-2.83766	-1.17738	-2.64346	-0.0735817	-3.68406	-3.21354	0.468267	-3.86958	-0.536629	-0.973982	-1.01886	-3.40418	0.0769138	3	___1							0.975618	1.92162e-06	83.834	57.412	77.276	-0.19059	161620000	267	0.936818	0.0754173	0.0826498	0.92829	0.110376	0.0946226	0.894996	-0.158892	-0.138839	AT1G31440.1	267
AT1G31440	SH3 domain-containing protein;(source:Araport11)	SH3 DOMAIN-CONTAINING PROTEIN 1 (SH3P1)	SH3 DOMAIN-CONTAINING PROTEIN 1 (SH3P1)	S	288	-3.23086	1.03152	-2.90164	1.14004	2.91261	2.72152	2.00285	1.32726	-3.36935	1.27948	1.55235	2.1942	3.34661	1.5402	-2.8022	-3.41453	1.46724	3	___1	+	Col-0_W_Col-0_D					0.899543	2.36158e-28	167.48	151.54	117.62	-0.1995	1882000000	288	0.0419609	-3.23129	-2.5766	0.853954	-0.119277	-0.193808	0.769376	0.592925	0.309568	AT1G31440.1	288
AT1G31460	vitellogenin-2 protein;(source:Araport11)	0	0	S	84	-2.07396	-3.4407	-2.57261	-2.35873	-3.38387	-2.54352	-1.38956	-1.74762	-1.76376	-1.68084	-1.85493	-2.39453	-2.64223	-1.85315	-2.45725	-2.12075	-2.4493	2	___1							1	0.000621546	86.463	71.451	86.463	-0.2446	81666000	84	0.540794	-0.345359	-0.648297	0.958689	0.0304963	0.0544454	0.489346	-0.269069	-0.745796	AT1G31460.1	84
AT1G31810	Encodes the Type II Arabidopsis formin14. Interacts with microtubules and microfilaments to regulate cell division.	FORMIN HOMOLOGY 14 (AFH14)	FORMIN HOMOLOGY 14 (AFH14); (ATFH14)	S	343	-0.805431	-3.23523	-4.07708	-2.67699	-0.251499	-0.159515	-3.63374	-0.839802	-3.09608	-1.006	-0.716965	-2.66663	-3.45913	-3.29033	-3.74579	-3.05231	-3.07528	2	___1							1	6.20805e-15	162.81	143.98	138.91	-1.3068	114780000	343	0.21753	-1.47754	-1.37752	0.110194	1.91756	1.93913	0.513285	0.592444	0.703255	AT1G31810.2;AT1G31810.1	343;343
AT1G31830	Encodes POLYAMINE UPTAKE TRANSPORTER 2, an amino acid permease family protein.	POLYAMINE UPTAKE TRANSPORTER 2 (PUT2)	POLYAMINE UPTAKE TRANSPORTER 2 (PUT2); (ATPUT2);PARAQUAT-RESISTANT 2 (PQR2)	S	22	0.483862	-2.68212	-2.61592	-3.55943	0.643597	1.0549	0.926657	1.09239	-3.16615	-2.81986	1.308	0.0153999	0.671167	-2.48791	-0.308617	-0.0173836	-3.9371	3	___1	+	Col-0_W_Col-0_D					0.820158	2.36306e-07	94.606	83.09	94.606	-0.64784	445100000	22	0.0146566	-3.02279	-3.39105	0.119054	1.52983	1.87884	0.670062	-0.672372	-0.452208	AT1G31830.2	22
AT1G31870	Ortholog of yeast BUD13 RES complex protein. Functions in pre mRNA processing of RNAs expressed in embryos.	BUD SITESELECTION PROTEIN 13 (BUD13)	BUD SITESELECTION PROTEIN 13 (BUD13)	S	244	-1.81252	-0.980755	-1.32468	-2.13883	-2.80739	-2.44321	-0.995428	-2.46827	-1.72974	-0.395742	-1.98217	-1.70075	-2.29861	-3.42584	-2.51197	-2.68405	-2.14637	2	___1					+	Col-0_W_5A-1_W	0.999878	2.51215e-06	123.95	92.875	122.45	1.7855	190960000	244	0.245838	0.614377	1.286	0.66144	0.296492	0.465059	0.0445319	0.883265	2.66656	AT1G31870.2;AT1G31870.1	244;244
AT1G31870	Ortholog of yeast BUD13 RES complex protein. Functions in pre mRNA processing of RNAs expressed in embryos.	BUD SITESELECTION PROTEIN 13 (BUD13)	BUD SITESELECTION PROTEIN 13 (BUD13)	S	117	-2.13643	-2.03969	-3.09263	-2.31846	-2.6066	-2.85899	-2.78446	-2.51235	-2.09091	-0.65007	-3.22218	-2.17132	-2.37252	-3.30245	-3.67699	-2.61004	-4.36741	2	___1							0.799432	0.0209207	57.019	37.233	57.019	-0.0061898	44376000	117	0.287795	0.293796	1.16618	0.8159	-0.0751692	-0.245401	0.0740928	1.15468	2.25198	AT1G31870.2;AT1G31870.1	117;117
AT1G31870	Ortholog of yeast BUD13 RES complex protein. Functions in pre mRNA processing of RNAs expressed in embryos.	BUD SITESELECTION PROTEIN 13 (BUD13)	BUD SITESELECTION PROTEIN 13 (BUD13)	S	286	1.65458	1.02816	0.618658	0.653204	-0.0699997	0.41272	1.14183	2.12595	1.89311	2.20292	1.82818	1.5508	1.05354	2.03775	0.935812	1.38033	1.31461	2	___1							1	1.28224e-19	209.39	209.39	209.39	-0.21874	1029200000	286	0.877527	0.0860229	0.160802	0.341276	-0.644736	-1.05124	0.503167	-0.221602	-0.721062	AT1G31870.2;AT1G31870.1	286;286
AT1G31870	Ortholog of yeast BUD13 RES complex protein. Functions in pre mRNA processing of RNAs expressed in embryos.	BUD SITESELECTION PROTEIN 13 (BUD13)	BUD SITESELECTION PROTEIN 13 (BUD13)	S	204	-0.524891	-1.26596	-1.11704	-0.972477	-0.389666	0.0650635	-0.583261	-0.0117607	-0.323869	-0.135397	-0.257032	0.0888252	0.597227	-0.380033	-0.805155	-1.09389	-0.817335	2	___1	+	Col-0_W_Col-0_D					1	1.59773e-06	149.38	74.188	137.84	0.1896	779300000	204	0.0157752	-0.740187	-3.33161	0.316473	-0.331912	-1.11265	0.765419	-0.0646348	-0.315091	AT1G31870.2;AT1G31870.1	204;204
AT1G31940	cystic fibrosis transmembrane conductance regulator;(source:Araport11)	0	0	S	110	-3.72456	-1.67161	-1.14386	-1.52267	-0.112925	0.719904	-0.122498	-0.543646	-3.21578	-2.68305	-4.55439	-2.64646	-3.37489	-1.76427	-2.07944	-1.97067	-1.65204	3	___1	+	Col-0_W_Col-0_D	+	Col-0_D_ost1_D			0.965695	2.21812e-12	131.04	118.48	100.08	0.1841	216710000	110	0.0201486	-2.00088	-3.13684	0.00357798	2.58042	5.16225	0.875106	-0.114958	-0.165403	AT1G31940.1	110
AT1G31940	cystic fibrosis transmembrane conductance regulator;(source:Araport11)	0	0	S	112	-0.465609	-3.06981	-1.95998	-3.37359	-3.2371	-3.01759	-3.77422	-3.37972	-1.18313	-0.758518	-1.28087	-2.51332	-3.63633	-3.36979	-3.87887	-2.0181	-2.47674	3	___1							0.951426	7.22787e-07	103.63	90.994	103.63	0.48516	41304000	112	0.144756	1.13491	1.67599	NaN	0	NaN	0.555365	0.57399	0.631648	AT1G31940.1	112
AT1G31940	cystic fibrosis transmembrane conductance regulator;(source:Araport11)	0	0	S	134	-0.274776	-2.99659	0.787279	-3.13178	1.62947	1.2563	2.70288	-3.18467	-2.35425	-2.75317	-2.74278	-3.68322	-3.01138	-3.5729	0.745346	-3.81457	-3.20153	3	___1			+	Col-0_D_ost1_D			0.772411	8.13885e-20	131.27	120.88	54.167	1.5992	728330000	134	0.264397	-2.00496	-1.23097	0.0481371	4.02349	2.60193	0.697789	0.686284	0.411444	AT1G31940.1	134
AT1G32050	SCAMP family protein;(source:Araport11)	SECRETORY CARRIER MEMBRANE PROTEIN 5 (SCAMP5)	SECRETORY CARRIER MEMBRANE PROTEIN 5 (SCAMP5); (ATSCAMP5)	S	39	-3.30507	-3.69384	-2.87673	-2.66808	-0.711594	-0.437014	-2.73713	-1.90138	-3.51824	-3.63386	-3.04924	-3.66255	-4.08903	-3.16407	-3.24238	-2.41281	-3.51537	3	___1	+	Col-0_W_Col-0_D	+	Col-0_D_ost1_D			0.781926	2.01018e-07	78.228	60.323	78.228	0.28128	152630000	39	0.0271639	-1.68915	-2.9048	0.0222993	2.19177	3.26591	NaN	0	NaN	AT1G32050.1	39
AT1G32090	early-responsive to dehydration stress protein (ERD4);(source:Araport11)	(OSCA1.8)	(OSCA1.8)	S	50	0.747744	-2.61149	-3.41253	0.164902	-0.823778	-0.297808	-0.441545	0.164667	0.664252	0.465855	0.160748	-0.668024	-3.42907	0.934256	0.466984	0.667877	0.219072	2	___1							0.998154	3.66374e-07	132.79	101.9	132.79	0.45166	387890000	50	0.407181	-0.928227	-0.891111	0.547597	0.704662	0.644589	0.213475	-1.72915	-1.42499	AT1G32090.1	50
AT1G32130	The C-terminal portion of this protein has high homology to the C-termini of the IWS1 (Interacts With Spt6) proteins found in yeast and humans. Interacts with transcription factor BES1. Involved in brassinosteroid-regulated gene expression.	(IWS1)	(IWS1);ARABIDOPSIS THALIANA IWS1 (FROM YEAST INTERACTS WITH SPT6) (ATIWS1);HIGH NITROGEN INSENSITIVE 9 (HNI9)	S	193	3.84027	3.48324	3.37552	3.892	1.69533	1.88161	3.81393	4.01908	3.91824	3.78715	4.1624	3.86748	3.09755	4.06288	3.87273	3.7131	4.22124	3	___1							0.996684	4.64339e-65	232.73	216.19	205.11	-0.099527	5274900000	193	0.253762	0.795274	1.26207	0.334004	-0.823484	-1.06884	0.20387	-0.287932	-1.46094	AT1G32130.2;AT1G32130.1	193;193
AT1G32150	Encodes a G group bZIP transcription factor family member that can bind cis elements with an ACGT core, such as G-box, Hex, C-box and As-1. The protein is localized in the nucleus and can homodimerize and can heterodimerize with other G group members.	BASIC REGION/LEUCINE ZIPPER TRANSCRIPTION FACTOR 68 (bZIP68)	BASIC REGION/LEUCINE ZIPPER TRANSCRIPTION FACTOR 68 (bZIP68); (AtbZIP68)	S	156	-1.04569	-0.790056	-1.19937	-0.680849	-1.98111	-3.20981	-0.851707	-0.885624	-3.0155	-3.05082	-0.658354	-4.69619	-3.27668	-3.11438	-3.99597	-2.9432	-3.27928	2	___1					+	Col-0_W_5A-1_W	1	2.70777e-12	151.98	125.86	69.03	0.15411	147280000	156	0.208831	0.80307	1.4078	0.0539138	1.96369	2.5087	0.000392446	2.47716	8.39731	AT1G32150.1	156
AT1G32340	Encodes a protein whose sequence is similar to tobacco hairpin-induced gene (HIN1) and Arabidopsis non-race specific disease resistance gene (NDR1). Expression is not detected under normal conditions and in response to cucumber mosaic virus or spermine.	NDR1/HIN1-LIKE 8 (NHL8)	NDR1/HIN1-LIKE 8 (NHL8)	S	144	-0.641851	-2.80345	-2.40902	-4.02116	0.0131092	0.395468	-0.123541	-0.290056	-0.537055	-0.717348	-0.833624	0.372213	0.27562	-0.70801	-3.83944	-3.38076	-1.04588	2	___1	+	Col-0_W_Col-0_D					1	1.10032e-40	220.04	191.76	220.04	-1.0061	248230000	144	0.0135397	-2.46761	-3.45561	0.9576	0.0188039	0.0558817	0.804724	0.286493	0.260695	AT1G32340.1	144
AT1G32360	Three CCCH zinc finger domain protein that may have a role in growth repression. Component of the m6A writer complex; HAKAI is required for the interaction between HIZ1 and MTA (mRNA adenosine methylase A).	(C3H12)	(C3H12);HAKAI-INTERACTING ZINC FINGER PROTEIN 1 (HIZ1); (ATC3H12)	S	8	-3.11287	-2.14645	-3.34165	-3.14074	-0.21501	0.02631	1.37215	0.527481	-0.43086	-3.05158	-3.17757	0.363958	-0.0126705	0.578825	-3.05053	-3.79619	-4.69644	3	___1	+	Col-0_W_Col-0_D					0.999708	3.1712e-27	128.14	119.67	62.018	0.020544	644020000	8	0.00026618	-3.36316	-7.62049	0.799541	0.117695	0.267812	NaN	0	NaN	AT1G32360.1	8
AT1G32400	TOM2A encodes a 280 amino acid putative four-pass transmembrane protein with a C-terminal farnesylation signal, essential for efficient multiplication of tobacco mosaic viruses.	TOBAMOVIRUS MULTIPLICATION 2A (TOM2A)	TOBAMOVIRUS MULTIPLICATION 2A (TOM2A)	S	196	4.85341	4.17664	3.98729	3.85376	3.89363	4.69904	4.74297	5.46906	4.71238	5.18333	5.09684	4.77273	4.97712	5.0047	4.17854	3.96806	4.17065	2	___1							1	6.07737e-75	278.72	260.53	229.02	-0.22984	12645000000	196	0.262579	-0.483398	-1.23621	0.598052	-0.217005	-0.562511	0.69425	0.112029	0.416602	AT1G32400.3;AT1G32400.2;AT1G32400.1	196;196;196
AT1G32400	TOM2A encodes a 280 amino acid putative four-pass transmembrane protein with a C-terminal farnesylation signal, essential for efficient multiplication of tobacco mosaic viruses.	TOBAMOVIRUS MULTIPLICATION 2A (TOM2A)	TOBAMOVIRUS MULTIPLICATION 2A (TOM2A)	S	233	0.513393	0.555183	0.860828	0.0500565	0.596872	-0.986189	1.47223	1.55295	0.686185	0.928888	0.878683	0.0899105	0.253242	0.788048	0.430647	0.347729	0.644785	3	___1							0.997975	1.24584e-22	161.32	150.24	98.019	0.1296	2983300000	233	0.797841	-0.1641	-0.267773	0.711363	0.281899	0.391779	0.926563	0.0204786	0.0969092	AT1G32400.3;AT1G32400.2;AT1G32400.1	233;233;233
AT1G32400	TOM2A encodes a 280 amino acid putative four-pass transmembrane protein with a C-terminal farnesylation signal, essential for efficient multiplication of tobacco mosaic viruses.	TOBAMOVIRUS MULTIPLICATION 2A (TOM2A)	TOBAMOVIRUS MULTIPLICATION 2A (TOM2A)	S	260	3.11111	3.33337	2.80399	2.62906	3.25997	2.33212	3.90341	4.23986	3.08763	3.49239	3.2912	3.15541	3.28665	3.67639	3.03331	3.08414	3.23649	3	___1							0.999574	1.73086e-184	411.58	362.31	282.74	-0.59091	9190900000	260	0.339959	-0.464458	-1.03642	0.910046	0.0610245	0.118817	0.475351	-0.148597	-0.771354	AT1G32400.3;AT1G32400.2;AT1G32400.1	260;260;260
AT1G32470	Single hybrid motif superfamily protein;(source:Araport11)	(GDC-H1)	(GDC-H1)	S	30	-0.907421	-1.00036	-0.697309	0.0283146	-3.44884	-3.1782	-2.06886	-0.930534	-3.36965	-2.41432	-0.0622826	-1.6246	-1.06386	-2.49492	-1.13402	-1.02429	-0.774725	2	___1	+	Col-0_W_Col-0_D					0.957715	8.65418e-06	114.72	87.606	101.89	-0.25033	215980000	30	0.02962	1.76241	2.83864	0.415453	-0.678818	-0.887504	0.301635	0.333484	1.1514	AT1G32470.1	30
AT1G33050	hypothetical protein;(source:Araport11)	0	0	S	213	2.07034	0.945686	1.01089	1.36921	-3.67505	-3.61292	1.21803	2.44435	2.32819	2.32595	2.44076	1.56608	0.818069	1.77719	1.38755	1.57947	2.02088	3	___1							0.994216	2.56703e-34	177.98	156.16	177.98	-0.61517	1134600000	213	0.213492	2.25543	1.39144	0.283405	-2.29351	-1.20137	0.402546	-0.313606	-0.914198	AT1G33050.3;AT1G33050.6;AT1G33050.2;AT1G33050.5;AT1G33050.4;AT1G33050.1	213;213;213;213;213;213
AT1G33050	hypothetical protein;(source:Araport11)	0	0	S	167	-1.29129	-1.64794	-2.50267	-3.54463	-4.31865	-2.61206	-1.58068	-3.61766	-1.3959	-0.814732	-2.1939	-0.756767	-2.9986	-1.51047	-3.16489	-2.98311	-2.18651	2	___1							0.815781	4.46806e-05	114.89	74.74	114.89	0.19317	79081000	167	0.352763	0.785631	1.00709	0.213492	-1.27698	-1.42493	0.447227	0.531542	0.824428	AT1G33050.3;AT1G33050.6;AT1G33050.2;AT1G33050.5;AT1G33050.4;AT1G33050.1	167;167;167;167;167;167
AT1G33240	Encodes a plant transcriptional activator that contains two separate, but similar, trihelix DNA-binding domains, similar to GT-2. Gene is expressed in all aerial parts of the plant, with higher level of expression in siliques. At-GTL2 was thought to be a duplicated copy of this gene but is likely to be a cloning artefact, the result of a chimeric clone. Regulates ploidy-dependent cell growth in t…	GT-2-LIKE 1 (GTL1)	GT2-LIKE 1 (AT-GTL1); (ATGTL1);GT-2-LIKE 1 (GTL1);GT2-LIKE 2 (AT-GTL2)	S	611	-2.18256	-2.69505	-2.58557	-3.18866	-3.37965	-2.97956	-2.91951	2.08361	3.49777	2.80575	2.73153	-2.31882	-3.35857	-3.58784	-2.89124	-2.39631	-3.26669	2	___1							1	4.19094e-37	241.07	212.71	224.34	-0.073001	400600000	611	0.535317	-0.864179	-0.657395	0.44888	1.28963	0.82124	NaN	0	NaN	AT1G33240.2;AT1G33240.1	611;650
AT1G33810	zinc finger/BTB domain protein;(source:Araport11)	0	0	S	21	-0.476982	-0.66951	-0.866566	-1.39019	-0.770521	-0.893915	-0.685961	-0.776831	-0.985751	-1.00172	-4.07598	-0.875227	-0.849113	-3.12903	-1.24804	-1.86915	-1.57987	3	___1					+	Col-0_W_5A-1_W	0.999963	4.40919e-07	123.29	103.03	123.29	-0.85182	602900000	21	0.743302	-0.0690045	-0.342992	0.244632	0.835982	1.31807	0.0493042	0.714875	2.58214	AT1G33810.1	21
AT1G33980	Involved in mRNA surveillance, detects exported mRNAs with truncated open reading frames and initiates nonsense-mediated mRNA decay (NMD). Regulates AT1G72910, AT1G72940, and ADR1-LIKE 2 in a temperature dependent manner.	(UPF3)	(ATUPF3); (UPF3)	S	324	-0.0280056	0.562286	0.0532494	-0.282358	0.398655	0.387636	0.493464	0.0880508	-0.0427637	0.242527	-0.625427	0.785719	0.206318	0.0641422	-0.62698	-0.603725	-0.764112	2	___1					+	Col-0_W_5A-1_W	0.999635	7.23953e-10	139.95	121.35	81.428	0.17173	660550000	324	0.227585	-0.265658	-1.34385	0.963802	-0.0101083	-0.0477001	0.0178612	0.741232	3.46938	AT1G33980.1;AT1G33980.2	324;326
AT1G33990	Encodes a protein predicted to act as a carboxylesterase. It has similarity to the SABP2 methyl salicylate esterase from tobacco. This protein does not act on methyl IAA, methyl JA, MeSA, MeGA4, or MEGA9 in vitro.	METHYL ESTERASE 14 (MES14)	METHYL ESTERASE 14 (ATMES14);METHYL ESTERASE 14 (MES14)	S	55	0.461473	1.02087	0.797678	0.593159	-0.920412	-3.67873	0.0477009	-3.74749	-2.47357	-2.67534	-3.58244	-2.81167	-2.9629	-2.89077	0.870125	0.650671	-2.24175	3	___1	+	Col-0_W_Col-0_D					1	6.72999e-38	252.17	224.5	92.792	-0.32568	927030000	55	0.0285333	2.79303	2.86715	0.508734	0.813716	0.711234	0.311278	0.958615	1.12603	AT1G33990.1	55
AT1G33990	Encodes a protein predicted to act as a carboxylesterase. It has similarity to the SABP2 methyl salicylate esterase from tobacco. This protein does not act on methyl IAA, methyl JA, MeSA, MeGA4, or MEGA9 in vitro.	METHYL ESTERASE 14 (MES14)	METHYL ESTERASE 14 (ATMES14);METHYL ESTERASE 14 (MES14)	S	77	1.12649	-1.9152	-3.4586	1.08948	-1.57098	-1.56323	0.621487	0.942883	1.37312	1.52759	0.92004	-0.289896	-0.0354328	0.547045	-3.79412	0.913834	0.538397	2	___1							0.999982	9.49223e-11	188.96	160.26	110.84	0.057235	517620000	77	0.77507	-0.396998	-0.298939	0.59947	-0.466365	-0.560268	0.996374	-0.00882796	-0.004776	AT1G33990.1	77
AT4G09810	Nucleotide-sugar transporter family protein. Can function in yeast as glucose transporter.	UDP-RHA/UDP-GAL TRANSPORTER 5 (URGT5)	UDP-RHA/UDP-GAL TRANSPORTER 5 (URGT5)	S	256	-2.39992	-2.18994	-2.13519	-4.62976	-2.67249	-2.5633	-2.36325	-2.596	-2.35815	-2.44806	-3.37658	-3.19873	-2.2152	-2.57511	-2.49045	-1.98307	-2.54838	2	___1							0.99998	0.0378503	90.15	57.68	90.15	-0.49452	58704000	256	0.647849	-0.289946	-0.48056	0.670128	0.114257	0.45211	0.522837	-0.49807	-0.686663	AT4G09810.2;AT4G09810.1;AT1G34020.3;AT1G34020.2;AT1G34020.1	256;313;313;313;313
AT1G34120	Encodes an inositol polyphosphate 5-phosphatase that appears to have Type I activity. It can dephosphorylate IP3(inositol(1,4,5)P3) and IP4 (inositol(1,3,4,5)P4), but it does not act on I(1)P, I(1,4)P2, or phosphatidylinositol(4,5)P2.	INOSITOL POLYPHOSPHATE 5-PHOSPHATASE I (IP5PI)	INOSITOL POLYPHOSPHATE 5-PHOSPHATASE I (IP5PI); (AT5P1); (ATIP5PI);MYO-INOSITOL POLYPHOSPHATE 5-PHOSPHATASE 1 (AT5PTASE1)	S	115	-2.54114	-3.00698	-2.57628	-3.38523	-3.62744	-3.13824	-3.39285	-2.10523	-2.57537	-2.71817	-2.61144	-2.41376	-4.54568	-2.08106	-2.57809	-2.42376	-3.51232	2	___1							0.978704	0.0073924	66.56	49.618	56.225	0.018769	42397000	115	0.646252	0.188532	0.482942	0.947544	-0.052434	-0.0691586	0.919397	-0.0393514	-0.106407	AT1G34120.5;AT1G34120.4;AT1G34120.1;AT1G34120.3;AT1G34120.2	115;266;266;270;270
AT1G34220	ISTL1 acts with LIP5 in endosomal trafficking within the tapetum during pollen development. Mutants have reduced transmission through both male and female gametophytes.	IST1-LIKE 1 (ISTL1)	IST1-LIKE 1 (ISTL1)	S	236	3.15094	2.0806	2.02333	2.22962	2.00269	1.37693	2.36526	3.26392	-3.80758	-2.33861	3.03379	1.9471	-4.15852	2.94498	2.29827	2.60202	2.91182	3	___1							0.991797	2.76088e-94	250.51	242.83	113.21	-0.81293	5684500000	236	0.810342	0.118922	0.250792	0.342531	2.00768	1.04824	0.529856	-0.232911	-0.674603	AT1G34220.2;AT1G34220.1	236;266
AT1G34220	ISTL1 acts with LIP5 in endosomal trafficking within the tapetum during pollen development. Mutants have reduced transmission through both male and female gametophytes.	IST1-LIKE 1 (ISTL1)	IST1-LIKE 1 (ISTL1)	S	608	-1.89107	-1.31234	-1.47562	-3.64842	-0.643703	-1.15442	-1.72867	-3.75096	-2.8592	-1.58516	-2.97099	-2.88654	-3.41463	-2.48561	-2.63781	-3.43524	-2.96877	3	___1							0.981925	4.49673e-15	146.15	140.8	146.15	-0.12586	111460000	608	0.772275	-0.262423	-0.302787	0.242083	1.10949	1.32633	0.218944	0.932081	1.4052	AT1G34220.2;AT1G34220.1	608;638
AT1G34220	ISTL1 acts with LIP5 in endosomal trafficking within the tapetum during pollen development. Mutants have reduced transmission through both male and female gametophytes.	IST1-LIKE 1 (ISTL1)	IST1-LIKE 1 (ISTL1)	S	353	1.31374	1.06017	0.953091	1.32145	2.41793	2.0204	2.37426	2.17208	1.44208	0.401484	1.81415	1.53877	2.08524	2.08887	1.10459	1.29288	1.64645	2	___1	+	Col-0_W_Col-0_D					1	4.14181e-24	169.6	149.34	169.6	-1.1799	2028400000	353	0.000166079	-1.08405	-8.29732	0.128578	0.341875	1.81898	0.329436	-0.185861	-1.08006	AT1G34220.2;AT1G34220.1	353;383
AT1G34220	ISTL1 acts with LIP5 in endosomal trafficking within the tapetum during pollen development. Mutants have reduced transmission through both male and female gametophytes.	IST1-LIKE 1 (ISTL1)	IST1-LIKE 1 (ISTL1)	S	327	1.48615	1.14234	1.07661	0.98782	1.64021	1.43706	1.68204	1.51316	1.2723	1.57759	1.46033	-2.07304	1.9304	1.72676	1.17762	1.23862	1.89899	2	___1	+	Col-0_W_Col-0_D					0.99999	1.74727e-09	133.32	109.61	133.32	0.11588	1157300000	327	0.0182363	-0.394886	-3.21567	0.384317	1.04008	0.953084	0.305397	-0.265182	-1.14142	AT1G34220.2;AT1G34220.1	327;357
AT1G34220	ISTL1 acts with LIP5 in endosomal trafficking within the tapetum during pollen development. Mutants have reduced transmission through both male and female gametophytes.	IST1-LIKE 1 (ISTL1)	IST1-LIKE 1 (ISTL1)	S	521	-2.13679	-3.1929	-2.55551	-4.05214	0.328072	1.08069	-4.18512	0.465187	0.176726	0.0841122	0.171413	-3.8981	-3.89067	-2.73189	-2.77736	-3.04302	-3.96571	3	___1							0.956836	5.18354e-30	189.33	164.31	160.67	-1.5825	204860000	521	0.109839	-2.40654	-1.8755	0.103269	2.92909	1.98986	NaN	0	NaN	AT1G34220.2;AT1G34220.1	521;551
AT1G34220	ISTL1 acts with LIP5 in endosomal trafficking within the tapetum during pollen development. Mutants have reduced transmission through both male and female gametophytes.	IST1-LIKE 1 (ISTL1)	IST1-LIKE 1 (ISTL1)	S	495	1.60547	-0.0154285	0.880236	0.623953	1.53915	2.21762	0.973606	1.37572	1.11564	0.822206	1.1762	-1.04988	-0.114603	-0.292147	0.476234	0.312956	0.747227	3	___1			+	Col-0_D_ost1_D			0.964493	1.77092e-51	225.3	204.65	211.71	-0.38868	1283700000	495	0.1259	-0.752966	-1.77699	0.00356355	2.01207	5.16709	0.552272	0.261419	0.636787	AT1G34220.2;AT1G34220.1	495;525
AT1G34220	ISTL1 acts with LIP5 in endosomal trafficking within the tapetum during pollen development. Mutants have reduced transmission through both male and female gametophytes.	IST1-LIKE 1 (ISTL1)	IST1-LIKE 1 (ISTL1)	S	547	2.82675	2.11864	2.32592	2.6125	0.660337	0.00969696	2.62248	2.98498	2.39489	2.28927	2.87896	0.129852	-5.13071	2.1964	1.8997	2.0421	2.82116	3	___1							0.982139	4.70276e-42	183.47	167.33	168.59	-0.67244	3372200000	547	0.271831	0.901577	1.20986	0.269737	2.50419	1.24075	0.505835	0.21663	0.716341	AT1G34220.2;AT1G34220.1	547;577
AT1G34220	ISTL1 acts with LIP5 in endosomal trafficking within the tapetum during pollen development. Mutants have reduced transmission through both male and female gametophytes.	IST1-LIKE 1 (ISTL1)	IST1-LIKE 1 (ISTL1)	S	469	2.72612	2.24753	2.1585	2.27815	0.748383	0.522598	-3.47219	3.07646	2.71045	3.12202	2.80857	1.7348	1.25857	2.59822	2.0359	1.95228	2.0764	2	___1							0.999832	9.96641e-20	168.69	154	146.45	-1.1642	1915700000	469	0.169016	2.13376	1.56328	0.362161	-1.64505	-1.00241	0.0834371	0.33105	2.15762	AT1G34220.2;AT1G34220.1	469;499
AT1G34260	Encodes a protein that is predicted to act as a phosphatidylinositol-3P 5-kinase, but, because it lacks a FYVE domain, it is unlikely to be efficiently targeted to membranes containing the porposed phosphatidylinositol-3P substrate. Therefore, its molecular function remains unknown. The mRNA is cell-to-cell mobile.	FORMS APLOID AND BINUCLEATE CELLS 1A (FAB1D)	FORMS APLOID AND BINUCLEATE CELLS 1A (FAB1D)	S	59	-3.09562	-2.39234	-2.24925	-3.17099	0.0640411	0.201197	0.0623302	-1.65367	-1.13212	-2.90882	-4.17846	-0.620661	-0.450726	-2.74169	-2.23923	-2.57257	-2.11998	2	___1	+	Col-0_W_Col-0_D					0.999987	2.45044e-13	161.21	143.74	161.21	-0.32704	172830000	59	0.00306984	-2.39553	-4.77777	0.297643	0.9395	1.16211	0.226788	-0.416458	-1.37763	AT1G34260.3;AT1G34260.2;AT1G34260.1	59;59;59
AT1G34320	Ikzf5 (DUF668);(source:Araport11)	PSK SIMULATOR 1 (PSI1)	PSK SIMULATOR 1 (PSI1)	S	586	0.486717	0.895418	0.334917	0.328821	-0.445351	-2.1124	-1.34369	-0.697269	0.567395	0.363705	0.10561	-0.0116482	0.00638771	0.659912	0.175188	0.547192	-2.6332	2	___1	+	Col-0_W_Col-0_D	+	Col-0_D_ost1_D			0.999816	1.59331e-23	186.72	152.93	186.72	0.83588	460480000	586	0.00569034	1.66115	4.19928	0.0353237	-1.3679	-2.862	0.236746	1.14841	1.34388	AT1G34320.2;AT1G34320.1	586;586
AT1G34570	Essential protein Yae1, N-terminal;(source:Araport11)	0	0	S	42	-0.131723	-1.35746	-0.770699	-0.2026	-3.70516	-2.3384	-1.17128	-0.552904	-0.0163584	-3.25568	0.18914	-1.34904	-3.15129	-0.816053	-0.633108	-1.02312	-0.418631	3	___1							0.806874	1.48769e-09	120.57	112.65	120.57	-0.23868	225990000	42	0.127831	1.32631	1.76599	0.873365	-0.169809	-0.167736	0.844939	0.0759981	0.205969	AT1G34570.1	42
AT1G34750	Protein phosphatase 2C family protein;(source:Araport11)	CERK-1 INTERACTING PROTEIN PHOSPHATASE 1 (CIPP1)	CERK-1 INTERACTING PROTEIN PHOSPHATASE 1 (CIPP1)	S	119	-2.27305	-2.52086	-2.92234	-3.0332	-0.343616	-0.0746117	-3.8137	-3.12745	-0.990903	-1.18304	-3.45427	-0.055769	-1.06174	-1.33418	-2.66545	-2.97356	-3.54742	2	___1							0.80233	0.000611341	78.505	48.067	78.505	-1.4406	114400000	119	0.415707	-0.847521	-0.874036	0.423602	-1.02261	-0.870983	NaN	0	NaN	AT1G34750.4;AT1G34750.3;AT1G34750.2;AT1G34750.1	119;119;119;119
AT1G35160	GF14 protein phi chain member of 14-3-3 protein family. This protein is reported to interact with the BZR1 transcription factor involved in brassinosteroid signaling and may affect the nucleocytoplasmic shuttling of BZR1 The mRNA is cell-to-cell mobile.	GF14 PROTEIN PHI CHAIN (GF14 PHI)	GF14 PROTEIN PHI CHAIN (GF14 PHI)	S	248	2.50832	2.23384	1.83061	2.35902	3.47129	3.1563	3.08764	2.89982	2.41762	-0.483561	2.55969	2.57489	2.8508	2.715	1.97348	2.35393	2.56963	2	___1	+	Col-0_W_Col-0_D	+	Col-0_D_ost1_D			1	4.76953e-152	372.26	349.62	372.26	-0.49093	4522200000	248	0.00270328	-0.920814	-4.90279	0.036783	0.4402	2.82749	0.781313	-0.066062	-0.292971	AT1G35160.1	248
AT1G35160	GF14 protein phi chain member of 14-3-3 protein family. This protein is reported to interact with the BZR1 transcription factor involved in brassinosteroid signaling and may affect the nucleocytoplasmic shuttling of BZR1 The mRNA is cell-to-cell mobile.	GF14 PROTEIN PHI CHAIN (GF14 PHI)	GF14 PROTEIN PHI CHAIN (GF14 PHI)	S	221	-2.44567	-3.00234	-2.98113	-3.279	0.269609	1.13838	-0.645273	-3.38995	-3.04216	-2.80813	-2.85375	-2.95728	-3.65413	-2.50284	-2.66715	-2.24432	-2.16531	3	___1							1	2.30683e-133	353	332.99	184.14	-0.2637	364620000	221	0.0629482	-2.27023	-2.27828	0.102718	2.38128	1.99405	NaN	0	NaN	AT1G35160.1;AT1G35160.2;AT1G78300.1;AT4G09000.1;AT4G09000.2	222;222;216;221;221
AT1G35220	FAM91 carboxy-terminus protein;(source:Araport11)	0	0	S	232	0.373596	0.209402	0.315483	-0.253876	-2.57075	-2.28979	-0.32387	0.246254	0.215034	1.00395	-0.339262	-0.422834	-0.225779	0.250689	-0.343819	-0.0318165	-0.376081	2	___1							1	2.29954e-07	128.08	119.17	126.76	-0.071652	402700000	232	0.0994341	1.39569	1.94727	0.250394	-1.1019	-1.29971	0.0847902	0.411724	2.1449	AT1G35220.7;AT1G35220.4;AT1G35220.6;AT1G35220.5;AT1G35220.3;AT1G35220.2;AT1G35220.1	232;232;255;311;327;327;327
AT1G35460	Encodes a bHLH transcription factor involved in CFL1-mediated regulation of cuticle development. Overexpression leads to abnormal cuticle development.	FLOWERING BHLH 1 (FBH1)	FLOWERING BHLH 1 (FBH1);ATCFL1 ASSOCIATED PROTEIN 2 (CFLAP2)	S	31	-4.09857	-1.40938	-2.19111	-3.3584	-2.85766	-0.802788	-0.0455151	-0.39263	-3.81943	-3.53003	-2.37338	-2.89084	-4.38041	-2.81128	-3.68683	-3.27855	-2.92031	3	___1			+	Col-0_D_ost1_D			0.789332	9.6473e-07	100.94	67.11	100.94	-2.8789	84306000	31	0.0922154	-1.73972	-2.00165	0.0418454	2.3362	2.71859	0.500777	0.530866	0.725305	AT1G35460.2;AT1G35460.1	31;31
AT1G35580	CINV1 / A/N-InvG is an alkaline/neutral invertase that breaks sucrose down into fructose and glucose (GH100). The exact localization of CINV1 remains under investigation but there is evidence that fluorescently-tagged CINV1 localizes to the cytoplasm. atinvg mutants have reduced root growth, reduced invertase activity, and increased expression of antioxidant genes under basal conditions. The leve…	CYTOSOLIC INVERTASE 1 (CINV1)	CYTOSOLIC INVERTASE 1 (CINV1);ALKALINE/NEUTRAL INVERTASE G (A/N-InvG);NEUTRAL INVERTASE 2 (NIN2)	S	11	1.84952	1.92711	1.9627	2.32016	2.32304	1.32134	1.69138	1.18544	0.785581	-2.66697	0.573826	2.01344	1.77477	1.31962	2.02454	2.45345	2.17859	2	___1							1	2.26695e-75	286.14	252.94	165.8	-0.64008	6986700000	11	0.21158	0.384573	1.39811	0.842656	-0.0723095	-0.209055	0.263949	-0.203988	-1.25798	AT1G35580.1;AT1G35580.2;AT1G35580.3	11;11;11
AT1G35580	CINV1 / A/N-InvG is an alkaline/neutral invertase that breaks sucrose down into fructose and glucose (GH100). The exact localization of CINV1 remains under investigation but there is evidence that fluorescently-tagged CINV1 localizes to the cytoplasm. atinvg mutants have reduced root growth, reduced invertase activity, and increased expression of antioxidant genes under basal conditions. The leve…	CYTOSOLIC INVERTASE 1 (CINV1)	CYTOSOLIC INVERTASE 1 (CINV1);ALKALINE/NEUTRAL INVERTASE G (A/N-InvG);NEUTRAL INVERTASE 2 (NIN2)	S	14	-3.69203	-0.886156	-0.354687	-1.25682	-2.25804	-2.19838	-1.4381	-2.99914	-1.29812	-3.22462	-2.10058	-0.379114	-3.71694	-0.742441	-3.14702	0.229181	-0.269915	2	___1							0.999931	3.28702e-29	197.09	167.11	148.15	-1.1282	4378300000	14	0.432887	0.675991	0.840407	0.553401	-0.610583	-0.634908	0.711966	-0.48484	-0.39091	AT1G35580.1;AT1G35580.2;AT1G35580.3	14;14;14
AT1G35580	CINV1 / A/N-InvG is an alkaline/neutral invertase that breaks sucrose down into fructose and glucose (GH100). The exact localization of CINV1 remains under investigation but there is evidence that fluorescently-tagged CINV1 localizes to the cytoplasm. atinvg mutants have reduced root growth, reduced invertase activity, and increased expression of antioxidant genes under basal conditions. The leve…	CYTOSOLIC INVERTASE 1 (CINV1)	CYTOSOLIC INVERTASE 1 (CINV1);ALKALINE/NEUTRAL INVERTASE G (A/N-InvG);NEUTRAL INVERTASE 2 (NIN2)	S	73	0.947458	-3.22886	-3.51657	0.0410671	0.302546	0.662851	-0.96516	0.432344	-3.32757	1.08134	0.705587	-2.78367	-3.96303	0.454092	0.565062	0.578384	1.09187	2	___1							0.870165	6.67561e-11	188.91	146.28	117.7	0.22418	537180000	73	0.24139	-1.54737	-1.29974	0.122101	2.20568	1.85917	0.166189	-2.18433	-1.61985	AT1G35580.1;AT1G35580.2;AT1G35580.3	73;73;73
AT1G35580	CINV1 / A/N-InvG is an alkaline/neutral invertase that breaks sucrose down into fructose and glucose (GH100). The exact localization of CINV1 remains under investigation but there is evidence that fluorescently-tagged CINV1 localizes to the cytoplasm. atinvg mutants have reduced root growth, reduced invertase activity, and increased expression of antioxidant genes under basal conditions. The leve…	CYTOSOLIC INVERTASE 1 (CINV1)	CYTOSOLIC INVERTASE 1 (CINV1);ALKALINE/NEUTRAL INVERTASE G (A/N-InvG);NEUTRAL INVERTASE 2 (NIN2)	S	547	3.95768	3.31657	3.0416	2.53161	2.99894	3.47858	3.25151	4.22862	-3.71292	-3.30536	4.13815	-2.9188	3.78171	-2.57003	3.87221	-4.17255	4.06981	2	___1							0.885864	0.0164064	68.557	62.103	60.167	0.090485	4314800000	547	0.511877	-0.277547	-0.697023	0.0795769	4.05845	2.19517	0.433796	1.95537	0.850658	AT1G35580.1;AT1G35580.2	547;547
AT1G35670	Encodes a Ca(2+)-dependent, calmodulin-independent protein kinase that is rapidly induced by drought and high-salt stress but not by low-temperature stress or heat stress. Positive regulator of ABA signaling. Phosphorylates ABA responsive transcription factors ABF1 and ABF4.	CALCIUM-DEPENDENT PROTEIN KINASE 2 (CDPK2)	CALCIUM-DEPENDENT PROTEIN KINASE 2 (ATCDPK2); (CPK11); (ATCPK11);CALCIUM-DEPENDENT PROTEIN KINASE 2 (CDPK2)	S	493	-3.55557	-2.86615	-2.4118	-2.81034	0.702414	0.525509	-1.6157	-4.56279	-2.97536	-1.44154	-3.85937	-2.75934	-3.64526	-2.04104	-3.69062	-2.92256	-3.27455	2	___1							1	3.98626e-66	270.77	250.38	270.77	-0.74326	139220000	493	0.229159	-1.67332	-1.3387	0.341963	1.57757	1.0496	NaN	0	NaN	AT1G35670.1	493
AT1G35720	Encodes a member of the annexin gene family, a diverse, multigene family of calcium-dependent, membrane-binding proteins. The protein was determined to have peroxidase activity. This activity is thought to be dependent on the presence of post-translational modifications (most likely phosphorylation). The protein was shown to be present as a mixture of monomer and homodimer. The homodimerization s…	ANNEXIN 1 (ANNAT1)	ANNEXIN 1 (ANNAT1); (OXY5); (ATOXY5);ANNEXIN 1 (ANN1); (ATANN1)	S	70	-3.14471	-2.50734	-2.52139	-3.55809	-2.01372	-1.05959	-1.63461	-1.8578	-3.62195	-2.78506	-4.83775	-1.33583	-1.40699	-1.72331	-3.14777	-2.43543	-2.91656	2	___1	+	Col-0_W_Col-0_D					1	0.00541551	83.998	64.362	83.998	0.38377	64397000	70	0.00790643	-1.29145	-3.90846	0.591514	-0.152719	-0.572897	NaN	0	NaN	AT1G35720.1	70
AT1G35720	Encodes a member of the annexin gene family, a diverse, multigene family of calcium-dependent, membrane-binding proteins. The protein was determined to have peroxidase activity. This activity is thought to be dependent on the presence of post-translational modifications (most likely phosphorylation). The protein was shown to be present as a mixture of monomer and homodimer. The homodimerization s…	ANNEXIN 1 (ANNAT1)	ANNEXIN 1 (ANNAT1); (OXY5); (ATOXY5);ANNEXIN 1 (ANN1); (ATANN1)	S	9	-1.53584	-2.50383	-1.97924	-2.35953	3.35759	3.67378	0.616367	-3.32597	-1.98889	-1.79171	-3.44773	1.07278	2.18954	-0.0586777	-2.75226	-3.36824	-2.42054	2	___1							0.997306	1.72529e-09	133.47	123.52	128.06	-0.31979	1166300000	9	0.100288	-3.17505	-1.94111	0.995217	0.012559	0.00629935	0.0816245	0.752402	2.17502	AT1G35720.1	9
AT1G36310	T-RNA methyltransferase involved in wobble uridine modifications.	TRNA METHYLTRANSFERASE 9 (TRM9)	TRNA METHYLTRANSFERASE 9 (TRM9);ARABIDOPSIS THALIANA TRNA METHYLTRANSFERASE 9 (AtTRM9)	S	45	-0.598392	-2.48102	-2.45964	-1.02313	-1.51696	-1.51568	-0.33556	0.371834	-0.677733	-1.23833	-0.185421	-2.48909	-0.646723	-0.482685	-0.678841	-0.941111	-0.355484	2	___1							0.998623	2.33818e-28	193.96	148.17	173.36	-1.0031	217560000	45	0.234059	-0.891455	-1.32287	0.578793	0.457075	0.593309	0.158748	-0.982068	-1.6554	AT1G36310.2;AT1G36310.1	45;45
AT1G36730	Conserved peptide uORF; regulates translation of any downstream ORF in response to environmental signals heat stress and water limitation.	(CPUORF19)	(CPUORF19)	S	221	-3.77232	-0.627041	-0.265636	-0.469389	0.412863	0.497229	0.240583	0.605955	-3.26372	-1.31669	-2.79684	-0.674995	-0.658964	-2.84975	-0.401134	-0.571621	-0.471777	3	___1			+	Col-0_D_ost1_D			0.98388	1.35194e-06	86.006	81.001	64.152	-0.88688	351160000	221	0.0850964	-1.72275	-2.05966	0.0308358	1.83373	2.97899	0.453069	-0.802086	-0.813204	AT1G36730.1	221
AT1G37130	Identified as a mutant resistant to chlorate. Encodes nitrate reductase structural gene. Involved in nitrate assimilation. Has nitrate reductase activity. Up-regulated by the fungus P. indica. Binds transcription factor At2g35940. The mRNA is cell-to-cell mobile.	NITRATE REDUCTASE 2 (NIA2)	NITRATE REDUCTASE 2 (NIA2); (B29); (NIA2-1);CHLORATE RESISTANT 3 (CHL3);NITRATE REDUCTASE (NR);NITRATE REDUCTASE 2 (NR2);ARABIDOPSIS NITRATE REDUCTASE 2 (ATNR2)	S	534	2.46787	1.46273	1.55578	1.89492	-0.978077	0.74297	-0.753222	1.91637	3.55519	4.37748	3.82061	-0.0244408	0.484341	0.857044	1.7755	1.39701	2.78646	2	___1							0.999263	2.85764e-12	150.49	140.64	104.17	-1.499	8969200000	534	0.065176	1.61331	2.25295	0.813307	-0.206971	-0.248943	0.761086	-0.140998	-0.321151	AT1G37130.1	534
AT1G37130	Identified as a mutant resistant to chlorate. Encodes nitrate reductase structural gene. Involved in nitrate assimilation. Has nitrate reductase activity. Up-regulated by the fungus P. indica. Binds transcription factor At2g35940. The mRNA is cell-to-cell mobile.	NITRATE REDUCTASE 2 (NIA2)	NITRATE REDUCTASE 2 (NIA2); (B29); (NIA2-1);CHLORATE RESISTANT 3 (CHL3);NITRATE REDUCTASE (NR);NITRATE REDUCTASE 2 (NR2);ARABIDOPSIS NITRATE REDUCTASE 2 (ATNR2)	S	62	-3.17607	-3.55208	-2.9558	5.61168	1.34417	1.19596	3.02098	3.59657	5.5337	-3.00923	5.55759	1.85005	1.45154	-3.50535	-3.81475	-2.96567	5.15657	3	___1							0.999986	8.64798e-38	199.03	187.72	122.68	-0.16303	4906000000	62	0.199355	-3.30749	-1.44214	0.202321	2.35734	1.46689	0.898317	-0.476787	-0.134416	AT1G37130.1	62
AT1G37130	Identified as a mutant resistant to chlorate. Encodes nitrate reductase structural gene. Involved in nitrate assimilation. Has nitrate reductase activity. Up-regulated by the fungus P. indica. Binds transcription factor At2g35940. The mRNA is cell-to-cell mobile.	NITRATE REDUCTASE 2 (NIA2)	NITRATE REDUCTASE 2 (NIA2); (B29); (NIA2-1);CHLORATE RESISTANT 3 (CHL3);NITRATE REDUCTASE (NR);NITRATE REDUCTASE 2 (NR2);ARABIDOPSIS NITRATE REDUCTASE 2 (ATNR2)	S	63	5.41363	4.72175	5.1064	-1.86921	-3.01106	-3.56138	-2.92458	-4.08054	-3.40438	5.30245	-2.9285	-3.47182	-3.0081	3.14051	5.60534	4.91774	-3.24377	3	___1	+	Col-0_W_Col-0_D					0.999893	4.7278e-47	212.77	205.9	107.2	-0.29095	7615000000	63	0.0087616	6.73753	3.81991	0.263405	-2.28125	-1.25961	0.782572	0.916709	0.291227	AT1G37130.1	63
AT1G42550	Encodes a plant-specific protein of unknown function that appears to be conserved among angiosperms. The mRNA is cell-to-cell mobile.	PLASTID MOVEMENT IMPAIRED1 (PMI1)	PLASTID MOVEMENT IMPAIRED1 (PMI1)	S	455	1.45778	1.15576	1.24185	1.47322	0.722832	-0.538019	0.657951	-3.91168	-1.07048	-3.17902	-3.47882	0.296848	-3.43472	0.573812	1.34974	1.91069	0.703207	3	___1							1	7.78917e-54	215.59	198.06	215.59	-0.43098	2079600000	455	0.102494	2.09938	1.92541	0.960517	0.0874573	0.0520335	0.972903	0.0109418	0.0357001	AT1G42550.1	455
AT1G42550	Encodes a plant-specific protein of unknown function that appears to be conserved among angiosperms. The mRNA is cell-to-cell mobile.	PLASTID MOVEMENT IMPAIRED1 (PMI1)	PLASTID MOVEMENT IMPAIRED1 (PMI1)	S	464	4.405	2.78795	2.79753	2.83554	0.759081	-3.91107	3.20739	-4.07583	3.90853	3.94784	4.22001	1.82272	1.31057	-2.29487	3.34294	3.00879	-2.49816	3	___1							0.999584	4.14182e-68	244.62	223.05	244.62	-0.7441	4162400000	464	0.0620855	4.21162	2.28834	0.613429	-1.28458	-0.538348	0.297549	1.92198	1.16236	AT1G42550.1	464
AT1G42550	Encodes a plant-specific protein of unknown function that appears to be conserved among angiosperms. The mRNA is cell-to-cell mobile.	PLASTID MOVEMENT IMPAIRED1 (PMI1)	PLASTID MOVEMENT IMPAIRED1 (PMI1)	S	407	2.29299	0.623531	0.429382	0.409935	2.39246	3.08874	1.20665	2.36226	1.50128	1.33931	1.498	0.905655	2.44641	0.950405	1.13473	0.774904	1.01382	2	___1							0.999908	1.57519e-112	322.95	302	297.05	0.019012	3194100000	407	0.0689625	-1.32357	-2.2119	0.24323	0.828369	1.32261	0.95049	-0.0355256	-0.0652673	AT1G42550.1	407
AT1G42550	Encodes a plant-specific protein of unknown function that appears to be conserved among angiosperms. The mRNA is cell-to-cell mobile.	PLASTID MOVEMENT IMPAIRED1 (PMI1)	PLASTID MOVEMENT IMPAIRED1 (PMI1)	S	323	-0.102903	-2.25696	-3.31453	-1.49859	-1.15568	-0.723846	-0.57538	0.16461	-0.29905	-3.08156	0.187641	-2.74548	-1.56526	-0.2677	-1.19822	-1.2731	-0.841434	2	___1							0.866969	1.51831e-12	147.49	127.03	61.212	0.42425	1216900000	323	0.14513	-1.22067	-1.67412	0.220493	0.953573	1.39968	0.432133	-0.688994	-0.853948	AT1G42550.1	323
AT1G42550	Encodes a plant-specific protein of unknown function that appears to be conserved among angiosperms. The mRNA is cell-to-cell mobile.	PLASTID MOVEMENT IMPAIRED1 (PMI1)	PLASTID MOVEMENT IMPAIRED1 (PMI1)	S	328	3.52231	2.69489	2.46632	2.78288	1.32016	1.99495	2.31199	2.96395	3.25748	4.1295	3.05991	1.79009	2.42063	2.66597	2.84975	2.8043	2.31513	2	___1							1	1.51831e-12	154.66	97.928	123.02	1.0119	3973500000	328	0.130955	0.718832	1.74854	0.765912	-0.144465	-0.314401	0.522626	0.210204	0.687028	AT1G42550.1	328
AT1G42550	Encodes a plant-specific protein of unknown function that appears to be conserved among angiosperms. The mRNA is cell-to-cell mobile.	PLASTID MOVEMENT IMPAIRED1 (PMI1)	PLASTID MOVEMENT IMPAIRED1 (PMI1)	S	439	-0.615389	-1.52516	-0.789566	-1.62347	0.851496	1.25362	-1.38017	-1.17023	-1.03326	-1.29063	-1.51088	-2.89874	-0.267166	-3.02961	-1.36338	-0.94393	-3.93545	2	___1							1	4.20432e-05	147.91	121.79	147.91	0.42691	319580000	439	0.206158	-1.02708	-1.41734	0.135968	1.95385	1.77557	0.312059	0.942525	1.12401	AT1G42550.1	439
AT1G42550	Encodes a plant-specific protein of unknown function that appears to be conserved among angiosperms. The mRNA is cell-to-cell mobile.	PLASTID MOVEMENT IMPAIRED1 (PMI1)	PLASTID MOVEMENT IMPAIRED1 (PMI1)	S	314	2.40597	2.32723	2.39232	1.85978	1.48087	1.77068	1.67616	1.82607	2.5138	3.16993	2.12805	0.0304356	0.634647	1.31235	1.34192	1.68883	1.21008	2	___1	+	Col-0_W_Col-0_D	+	Col-0_D_ost1_D	+	Col-0_W_5A-1_W	1	0.000136537	154.01	143.2	106.62	-1.0818	1891400000	314	0.00999852	0.557883	3.70755	0.0242215	1.0293	3.1916	0.00789389	0.832713	4.27595	AT1G42550.1	314
AT1G42550	Encodes a plant-specific protein of unknown function that appears to be conserved among angiosperms. The mRNA is cell-to-cell mobile.	PLASTID MOVEMENT IMPAIRED1 (PMI1)	PLASTID MOVEMENT IMPAIRED1 (PMI1)	S	78	1.54966	-2.56832	-2.87402	1.38881	0.837046	0.726431	0.972336	2.12823	1.48754	1.8387	1.60458	0.19651	0.454	0.458385	-2.97923	0.806412	0.410551	2	___1							1	0.0045994	91.658	47.455	42.718	0.48513	1247900000	78	0.203075	-1.79198	-1.42849	0.0972082	0.796378	2.03725	0.983288	-0.0385452	-0.0220138	AT1G42550.1	78
AT1G42550	Encodes a plant-specific protein of unknown function that appears to be conserved among angiosperms. The mRNA is cell-to-cell mobile.	PLASTID MOVEMENT IMPAIRED1 (PMI1)	PLASTID MOVEMENT IMPAIRED1 (PMI1)	S	41	1.96324	1.48022	1.22743	0.807837	0.986952	1.27151	-3.85294	1.14879	1.62078	2.59932	1.31063	2.19404	2.23691	2.00424	1.30211	0.849588	0.496611	2	___1							0.999052	0.00116762	121.8	85.35	93.096	0.7064	1294600000	41	0.28836	1.48111	1.16467	0.187483	-2.25649	-1.5262	0.218437	0.486915	1.40702	AT1G42550.1	41
AT1G42550	Encodes a plant-specific protein of unknown function that appears to be conserved among angiosperms. The mRNA is cell-to-cell mobile.	PLASTID MOVEMENT IMPAIRED1 (PMI1)	PLASTID MOVEMENT IMPAIRED1 (PMI1)	S	507	4.04828	3.46021	3.66141	3.78792	-0.0692444	-0.346064	2.85311	3.75268	4.38781	4.01862	4.62941	2.13524	1.49755	3.40901	4.64974	3.54466	3.87359	2	___1							0.999962	3.49675e-172	396.29	384.2	396.29	-0.67977	4899300000	507	0.0793705	2.19184	2.11002	0.567647	-0.79965	-0.611425	0.403377	-0.283209	-0.91246	AT1G42550.1	507
AT1G42550	Encodes a plant-specific protein of unknown function that appears to be conserved among angiosperms. The mRNA is cell-to-cell mobile.	PLASTID MOVEMENT IMPAIRED1 (PMI1)	PLASTID MOVEMENT IMPAIRED1 (PMI1)	S	48	-3.27388	-3.59985	-3.01179	-4.5789	0.285192	-0.066391	-1.67311	-3.28912	-2.36231	-3.56404	-3.29261	-2.30018	-2.33206	-3.09955	-4.58458	-3.39925	-4.14423	2	___1	+	Col-0_W_Col-0_D					0.89668	1.86597e-09	133.45	103.12	133.45	1.6693	98782000	48	0.0340453	-2.43025	-2.73311	0.220904	1.39141	1.39823	NaN	0	NaN	AT1G42550.1	48
AT1G42970	Encodes chloroplast localized glyceraldehyde-3-phosphate dehydrogenase that can use both NADH and NADPH to reduce 1,3-diphosphate glycerate. It forms A2B2 heterotetramers with GapA forms of the GADPH enzyme. These complexes are active in the light under reducing conditions, but show reduced NADPH-dependent activity in response to oxidized thioredoxins and increased NAD(H)/NADP(H) ratios due to th…	GLYCERALDEHYDE-3-PHOSPHATE DEHYDROGENASE B SUBUNIT (GAPB)	GLYCERALDEHYDE-3-PHOSPHATE DEHYDROGENASE B SUBUNIT (GAPB)	S	116	-2.0364	-3.55354	-3.24099	-3.05863	-3.9528	-2.1801	-2.80857	-1.39774	-1.38077	-1.44068	-0.963861	-2.87397	-1.78806	-2.94158	-3.41287	0.0552139	-2.8191	2	___1							0.999997	0.033632	59.606	37.95	59.606	-2.5898	74668000	116	0.561995	-0.38759	-0.613616	0.946378	-0.0502642	-0.0706995	0.392517	-0.91347	-0.935412	AT1G42970.1	116
AT1G42970	Encodes chloroplast localized glyceraldehyde-3-phosphate dehydrogenase that can use both NADH and NADPH to reduce 1,3-diphosphate glycerate. It forms A2B2 heterotetramers with GapA forms of the GADPH enzyme. These complexes are active in the light under reducing conditions, but show reduced NADPH-dependent activity in response to oxidized thioredoxins and increased NAD(H)/NADP(H) ratios due to th…	GLYCERALDEHYDE-3-PHOSPHATE DEHYDROGENASE B SUBUNIT (GAPB)	GLYCERALDEHYDE-3-PHOSPHATE DEHYDROGENASE B SUBUNIT (GAPB)	S	426	-2.9977	-3.21946	-2.09309	-3.40334	-0.25115	0.591795	-0.641678	-3.67324	-3.25798	-3.26261	-3.3422	-3.28878	-2.55676	-2.8814	-4.32193	-2.95808	-2.78374	2	___1							1	9.94307e-29	182.09	167.06	182.09	-0.70058	123740000	426	0.0941492	-1.93483	-1.98667	0.14619	1.91541	1.71932	0.459936	0.426185	0.800149	AT1G42970.1	426
AT1G43130	like COV 2;(source:Araport11)	LIKE COV 2 (LCV2)	LIKE COV 2 (LCV2)	S	28	-0.161362	-0.337599	-2.7596	-0.974556	0.00534821	-0.219133	0.00404739	-2.59186	-0.750745	-0.455704	-0.781048	-0.148554	0.148052	-2.24508	-0.968948	-0.658623	-0.620996	3	___1							0.999965	2.52616e-72	235.17	217.44	150.89	0.36917	2797000000	28	0.694251	-0.357879	-0.412581	0.962678	0.0481262	0.0491829	0.681013	-0.308756	-0.436009	AT1G43130.1	28
AT1G43620	Encodes a UDP-glucose:sterol-glucosyltransferase. Mutants produce pale greenish-brown seeds whose dormancy was slightly reduced	(UGT80B1)	TRANSPARENT TESTA 15 (TT15);TRANSPARENT TESTA GLABROUS 15 (TTG15); (UGT80B1)	S	33	-2.18397	-3.24577	-2.49479	-3.64531	0.19524	-0.0922718	-1.95851	-1.79379	-2.23823	-2.13146	-2.39406	-2.70952	-0.217398	-2.66267	-3.88871	-3.39372	-3.22463	2	___1	+	Col-0_W_Col-0_D					0.998272	9.06569e-40	208.13	192.59	208.13	-0.22876	181920000	33	0.0230762	-1.98013	-3.03073	0.365613	0.950864	0.994563	0.215916	0.609895	1.4161	AT1G43620.7;AT1G43620.6;AT1G43620.5;AT1G43620.4;AT1G43620.3;AT1G43620.2;AT1G43620.1	33;33;33;33;33;33;33
AT1G43620	Encodes a UDP-glucose:sterol-glucosyltransferase. Mutants produce pale greenish-brown seeds whose dormancy was slightly reduced	(UGT80B1)	TRANSPARENT TESTA 15 (TT15);TRANSPARENT TESTA GLABROUS 15 (TTG15); (UGT80B1)	S	22	-3.75136	-2.67629	-3.27469	-3.49886	-0.402781	-0.301338	-2.67909	-2.5923	-2.66422	-2.68998	-3.11792	-3.09697	-3.4764	-2.18756	-3.07403	-3.20236	-3.15396	3	___1	+	Col-0_W_Col-0_D					1	2.56172e-05	84.962	70.587	84.962	-1.0523	67377000	22	0.0414505	-1.80642	-2.5857	0.151684	1.42643	1.6907	NaN	0	NaN	AT1G43620.7;AT1G43620.6;AT1G43620.5;AT1G43620.4;AT1G43620.3;AT1G43620.2;AT1G43620.1	22;22;22;22;22;22;22
AT1G43630	plant/protein (DUF793);(source:Araport11)	0	0	S	227	0.703907	-0.148556	-0.143393	-0.287888	-1.39481	-0.858767	-0.650909	0.587408	0.519332	0.595198	0.418531	-0.460743	-0.144829	-0.125969	0.195309	0.180946	-0.0031147	2	___1							0.999928	0.00267718	105.98	49.717	103.26	0.54747	436550000	227	0.247707	0.610288	1.2803	0.535449	-0.335423	-0.66507	0.746798	-0.0933623	-0.341236	AT1G43630.1;AT1G18740.1;AT1G74450.1	227;205;213
AT1G43690	ubiquitin interaction motif-containing protein;(source:Araport11)	0	0	S	46	0.349285	0.597832	0.474567	-0.642162	0.798298	-0.344439	-0.781458	-0.851408	0.250428	0.78875	-4.08158	-0.192226	0.276115	0.348118	-0.488007	0.14839	-1.02155	3	___1							0.999997	1.21964e-17	148.6	132.71	99.494	-0.64492	779860000	46	0.342509	0.489632	1.03051	0.396013	-0.438754	-0.92797	0.19952	0.648601	1.47776	AT1G43690.1	46
AT1G43700	Encodes a VirE2-interacting protein. VIP1 mediates nuclear translocation of VirE2 via its amino half, and interacts with histone H2A via it carboxyl half. Involved in osmosensory response. The mRNA is cell-to-cell mobile.	VIRE2-INTERACTING PROTEIN 1 (VIP1)	VIRE2-INTERACTING PROTEIN 1 (VIP1);SULPHATE UTILIZATION EFFICIENCY 3 (SUE3); (ATVIP1)	S	115	1.17926	-0.214695	-0.0803356	-0.0164833	1.49844	1.26592	2.10334	2.48303	1.95685	1.09962	1.84719	2.54039	2.65121	2.10119	0.454268	0.482145	1.47483	2	___1	+	Col-0_W_Col-0_D					0.999973	1.05537e-116	344.16	315.95	321.81	-0.72057	1264500000	115	0.00897987	-1.62075	-3.79885	0.158355	-0.593248	-1.65732	0.271259	-0.586811	-1.23628	AT1G43700.1	115
AT1G43700	Encodes a VirE2-interacting protein. VIP1 mediates nuclear translocation of VirE2 via its amino half, and interacts with histone H2A via it carboxyl half. Involved in osmosensory response. The mRNA is cell-to-cell mobile.	VIRE2-INTERACTING PROTEIN 1 (VIP1)	VIRE2-INTERACTING PROTEIN 1 (VIP1);SULPHATE UTILIZATION EFFICIENCY 3 (SUE3); (ATVIP1)	S	151	-2.87126	-2.45288	-2.34904	-3.90259	-1.76069	-2.68732	-0.337072	-1.68011	-3.30718	-2.95484	-3.87984	0.210709	-3.70768	-2.81293	-2.98592	-0.903212	-4.30404	2	___1							0.857925	5.60968e-28	167.57	152.87	160.69	-1.7024	78913000	151	0.0772128	-1.27765	-2.12997	0.688321	0.487007	0.425271	0.867625	-0.162887	-0.17543	AT1G43700.1	151
AT1G44910	Binds the carboxyl-terminal domain (CTD) of the largest subunit of RNA polymerase II and functions as a scaffold for RNA processing machineries.	PRE-MRNA-PROCESSING PROTEIN 40A (PRP40A)	PRE-MRNA-PROCESSING PROTEIN 40A (PRP40A);PRE-MRNA-PROCESSING PROTEIN 40A (ATPRP40A)	S	858	-2.83135	-2.32292	-0.84322	-3.69928	-3.03355	-3.30681	-1.68892	-3.00907	-2.67926	-3.24295	-3.19897	-1.36892	-4.11494	-2.62936	-3.52443	-3.89526	-2.65446	3	___1							0.994183	2.87048e-05	92.412	71.473	69.72	-0.94297	126740000	858	0.648924	0.335396	0.478957	0.947084	-0.0551794	-0.0697666	0.280653	0.933858	1.20916	AT1G44910.2;AT1G44910.1	858;858
AT1G45249	Leucine zipper transcription factor that binds to the abscisic acid (ABA)?responsive element (ABRE) motif in the promoter region of ABA-inducible genes. Enhances drought tolerance in vegetative tissues. Required for normal glucose response. Localized in the nucleus. Expressed constitutively in roots, leaf vascular tissues, and hydathodes or in all tissues under stress conditions. It Primes phosph…	0	0	S	55	-2.027	-3.05933	-2.76982	-2.36036	1.59797	0.579863	1.43567	-0.565218	-1.88193	-3.42715	-3.37332	0.399324	0.822903	0.531618	-2.21117	-2.08835	-2.46272	2	___1	+	Col-0_W_Col-0_D					1	8.42148e-16	184.21	158.74	65.295	1.0988	398630000	55	0.000896119	-3.3162	-6.08458	0.777751	0.177457	0.297914	0.338665	-0.300046	-1.05753	AT1G45249.5;AT1G45249.10;AT1G45249.9;AT1G45249.8;AT1G45249.4;AT1G45249.2;AT1G45249.1;AT1G45249.3;AT1G45249.7;AT1G45249.6;AT1G49720.3;AT1G49720.1;AT1G49720.2;AT3G19290.5;AT3G19290.1;AT3G19290.3;AT3G19290.4;AT3G19290.2;AT4G34000.4;AT4G34000.2;AT4G34000.1;AT4G34000.3	45;45;45;45;45;45;45;45;60;60;50;50;50;61;61;61;61;61;55;55;55;55
AT1G45249	Leucine zipper transcription factor that binds to the abscisic acid (ABA)?responsive element (ABRE) motif in the promoter region of ABA-inducible genes. Enhances drought tolerance in vegetative tissues. Required for normal glucose response. Localized in the nucleus. Expressed constitutively in roots, leaf vascular tissues, and hydathodes or in all tissues under stress conditions. It Primes phosph…	0	0	S	188	-1.80627	-2.73825	-3.84123	-3.65544	0.00983429	-0.349419	-0.118744	-1.18526	-0.760352	-1.26163	-1.06463	-0.0145645	0.762575	-0.306862	-2.60094	-2.22442	-3.2018	3	___1	+	Col-0_W_Col-0_D					1	1.75936e-05	86.732	81.754	86.732	-1.0198	226160000	188	0.00295264	-2.5994	-4.81582	0.236655	-0.557948	-1.34418	0.602883	-0.334577	-0.55488	AT1G45249.5;AT1G45249.10;AT1G45249.9;AT1G45249.8;AT1G45249.4;AT1G45249.2;AT1G45249.1;AT1G45249.3;AT1G45249.7;AT1G45249.6	188;188;188;188;188;188;188;188;203;203
AT1G45249	Leucine zipper transcription factor that binds to the abscisic acid (ABA)?responsive element (ABRE) motif in the promoter region of ABA-inducible genes. Enhances drought tolerance in vegetative tissues. Required for normal glucose response. Localized in the nucleus. Expressed constitutively in roots, leaf vascular tissues, and hydathodes or in all tissues under stress conditions. It Primes phosph…	0	0	S	26	-2.57177	-3.68963	-2.43096	-3.33628	0.274292	-1.40602	0.251377	-0.0686588	-2.26262	-3.43506	-3.6836	0.347115	0.717709	0.360567	-2.98699	-3.40379	-2.54784	2	___1	+	Col-0_W_Col-0_D					1	7.97428e-39	208.49	190.83	208.49	0.7189	239740000	26	0.00144802	-2.76991	-5.54856	0.198694	-0.712383	-1.48099	NaN	0	NaN	AT1G45249.5;AT1G45249.10;AT1G45249.9;AT1G45249.8;AT1G45249.4;AT1G45249.2;AT1G45249.1;AT1G45249.3;AT1G45249.7;AT1G45249.6	26;26;26;26;26;26;26;26;41;41
AT1G45688	CC1 is a plant specific gene that interacts with with the cellulose synthase complex and microtubules. It appears to play a role in localizing CESA to the membrane, microtuble dynamics , particularly during salt stress.	COMPANION OF CELLULOSE SYNTHASE 1 (CC1)	COMPANION OF CELLULOSE SYNTHASE 1 (CC1)	S	30	2.08042	1.09655	0.562851	1.03342	-0.73229	-2.41722	-0.589813	1.08184	1.71332	2.28281	1.28587	-1.09713	-0.49025	0.529913	1.07871	1.54818	0.625229	2	___1							0.997184	1.14425e-09	132.83	107.81	53.08	0.98783	1499600000	30	0.0552596	1.85768	2.37345	0.752095	-0.311882	-0.333772	0.812966	0.109273	0.24941	AT1G45688.2;AT1G45688.1	30;30
AT1G45688	CC1 is a plant specific gene that interacts with with the cellulose synthase complex and microtubules. It appears to play a role in localizing CESA to the membrane, microtuble dynamics , particularly during salt stress.	COMPANION OF CELLULOSE SYNTHASE 1 (CC1)	COMPANION OF CELLULOSE SYNTHASE 1 (CC1)	S	15	-0.728136	-3.6673	-3.36977	-3.572	-2.943	-2.63338	-3.24343	-0.969181	-0.252435	0.281733	-0.405365	-2.83628	-1.41671	-3.28115	-2.77895	-4.32585	-3.50514	3	___1							0.8044	6.52613e-10	138.09	115.72	108.17	-0.28495	587020000	15	0.671612	-0.387055	-0.445456	0.936313	0.0641296	0.0840039	0.476884	0.702345	0.768529	AT1G45688.2;AT1G45688.1	15;15
AT1G45688	CC1 is a plant specific gene that interacts with with the cellulose synthase complex and microtubules. It appears to play a role in localizing CESA to the membrane, microtuble dynamics , particularly during salt stress.	COMPANION OF CELLULOSE SYNTHASE 1 (CC1)	COMPANION OF CELLULOSE SYNTHASE 1 (CC1)	S	20	0.934618	1.63616	1.14214	1.5419	-2.61574	-2.73511	1.29112	-2.71264	1.69721	1.40882	1.08087	-1.83258	-3.99869	-2.79069	1.78568	1.67255	1.19145	2	___1	+	Col-0_W_Col-0_D					0.999967	2.75063e-38	202.94	171.76	133.21	0.22704	2352900000	20	0.0246154	3.0068	2.98067	0.401575	1.1809	0.916234	0.38511	-0.236191	-0.951361	AT1G45688.2;AT1G45688.1	20;20
AT1G47200	WPP family members contains an NE targeting domain. This domain, called the WPP domain after a highly conserved Trp-Pro-Pro motif, is necessary for NE targeting of WPP1. RNAi suppression of WPP2 resulted in reduced mitotic activity.	WPP DOMAIN PROTEIN 2 (WPP2)	WPP DOMAIN PROTEIN 2 (WPP2)	S	173	2.48627	1.38991	1.74892	2.04374	3.449	3.38955	3.08696	2.96962	2.4076	1.75993	2.44992	-3.14136	3.18683	2.6949	2.25012	-2.97636	-2.80697	3	___1	+	Col-0_W_Col-0_D					0.999999	4.10089e-85	247.01	234.95	247.01	-0.2214	2467500000	173	0.002366	-1.30657	-5.03609	0.233633	2.31032	1.35428	0.0876212	3.09495	2.11896	AT1G47200.1	173
AT1G47330	methyltransferase, putative (DUF21);(source:Araport11)	0	0	S	234	-2.59693	-2.34874	-2.99991	-2.85308	-1.52333	-1.41364	-2.06719	-1.55882	-1.92693	-2.12029	-4.62143	-1.65211	-1.38109	-1.99331	-3.13484	-2.70555	-3.24358	2	___1	+	Col-0_W_Col-0_D					0.997448	3.75449e-05	101.96	87.08	101.96	-1.4166	71170000	234	0.00205272	-1.05892	-5.18081	0.884356	0.0347576	0.153034	0.193265	0.328324	1.50257	AT1G47330.2;AT1G47330.1	234;315
AT1G47820	hypothetical protein;(source:Araport11)	0	0	S	71	3.0288	2.8591	3.16815	3.12541	2.18146	1.29384	2.65938	2.94525	3.01981	1.54616	3.11089	2.62649	2.39481	3.19481	2.60502	3.21316	3.07745	4	___1							1	1.74883e-68	217.28	207.21	191.43	-0.59464	5963400000	71	0.0796775	0.775381	2.10723	0.366008	-0.468718	-0.993669	0.664833	0.0801555	0.459992	AT1G47820.2;AT1G47820.1	71;71
AT1G47970	nucleolin;(source:Araport11)	0	0	S	187	-2.68429	-3.663	-3.085	-5.36435	-4.34678	-2.44066	-4.40789	-4.02777	-4.86681	-3.08715	-4.76678	-3.17953	-5.72271	-3.46292	-2.91742	-5.14988	-3.39687	3	___1							1	0.00129703	69.361	62.168	69.361	-0.28609	15254000	187	0.891605	0.106617	0.142162	0.730648	0.315948	0.364136	0.897275	0.122229	0.135803	AT1G47970.1	187
AT1G48030	Encodes a mitochondrial lipoamide dehydrogenase whose expression is induced by light.	MITOCHONDRIAL LIPOAMIDE DEHYDROGENASE 1 (mtLPD1)	MITOCHONDRIAL LIPOAMIDE DEHYDROGENASE 1 (mtLPD1)	S	319	-0.538435	-0.81946	-0.688091	-0.803024	-1.27863	-1.19342	-1.86072	-0.430357	-0.369029	-3.30087	-0.442505	-0.681999	-0.422657	-0.389446	-0.864298	-1.13618	-0.655169	2	___1							0.998097	5.05295e-10	177.1	130.26	167.44	0.24796	250300000	319	0.162672	0.478529	1.59119	0.109213	-0.692747	-1.94611	0.270122	0.172964	1.23962	AT1G48030.5;AT1G48030.4;AT1G48030.3;AT1G48030.2;AT1G48030.1;AT3G17240.3;AT3G17240.1	319;319;319;319;319;319;319
AT1G48090	calcium-dependent lipid-binding family protein;(source:Araport11)	0	0	S	440	-2.72919	-1.32626	-1.36246	-1.11114	-1.32103	-1.48032	-0.370277	-2.64396	-1.09858	-3.43813	-1.22876	-2.05555	-1.33109	-2.84742	-1.09536	-0.757126	-0.993134	2	___1							1	0.000736349	109.66	94.984	71.349	-0.39984	173260000	440	0.774509	-0.178365	-0.299711	0.389244	0.624124	0.942429	0.185467	-0.683721	-1.53461	AT1G48090.5;AT1G48090.6;AT1G48090.4;AT1G48090.1;AT1G48090.3;AT1G48090.2	440;440;440;481;462;481
AT1G48090	calcium-dependent lipid-binding family protein;(source:Araport11)	0	0	S	1070	-0.732075	-3.0718	-2.72551	-4.3379	1.36348	1.06354	-3.38422	-0.338789	-3.516	-3.26057	-2.71677	-1.09437	1.19825	-4.12516	-5.15609	-1.58253	-3.47746	2	___1							0.999997	3.83669e-90	323.98	303.93	323.98	-0.63197	291870000	1070	0.11926	-2.39283	-1.81612	0.600641	1.01643	0.558417	0.601382	0.688538	0.557247	AT1G48090.5;AT1G48090.6;AT1G48090.4;AT1G48090.1;AT1G48090.3;AT1G48090.2	1070;1070;1070;1111;1092;1111
AT1G48090	calcium-dependent lipid-binding family protein;(source:Araport11)	0	0	S	1225	-0.78376	-2.71004	-2.69141	-3.89533	-0.251966	-3.39189	-3.74356	-3.59475	-0.571271	-0.61725	-0.57143	-1.40202	-0.885857	-0.752462	-3.2079	-1.56774	-4.16391	3	___1							0.86679	0.0143214	48.097	40.736	48.097	0.50937	118720000	1225	0.837701	0.225406	0.21391	0.144118	-1.7321	-1.7304	0.662256	0.459713	0.463839	AT1G48090.5;AT1G48090.6;AT1G48090.4;AT1G48090.1;AT1G48090.3;AT1G48090.2	1225;1225;1225;1266;1247;1266
AT1G48110	evolutionarily conserved C-terminal region 7;(source:Araport11)	EVOLUTIONARILY CONSERVED C-TERMINAL REGION 7 (ECT7)	EVOLUTIONARILY CONSERVED C-TERMINAL REGION 7 (ECT7)	S	537	-1.80708	-2.07197	-2.07881	-1.73101	-3.09114	-2.86214	-1.94012	-2.05566	-1.52033	-0.989779	-2.0144	-3.34677	-3.41857	-1.666	-3.15804	-1.5544	-1.84127	2	___1							0.834449	0.00406299	71.08	37.992	62.378	0.026929	97088000	537	0.109624	0.565051	1.87691	0.605901	0.323179	0.550131	0.565409	0.262353	0.615089	AT1G48110.2;AT1G48110.1	537;537
AT1G48120	Encodes a nuclear localized aminotransferase-like protein containing a plant mobile domain.	MAIN-LIKE 3 (MAIL3)	MAIN-LIKE 3 (MAIL3)	S	992	-2.71269	-2.50794	-1.00574	-2.45925	-1.15546	-3.09881	0.0322647	0.280436	-3.61794	-1.01239	-2.64756	-2.76139	-2.27991	-2.51368	-3.75576	-3.24156	0.220951	3	___1							0.860738	7.95668e-22	156.89	139.91	60.348	0.17593	129740000	992	0.219468	-1.18601	-1.37092	0.156418	1.53293	1.66686	0.94204	0.0873835	0.0764319	AT1G48120.1	992
AT1G48210	Plays role in abscisic acid (ABA)-dependent pathway in response to dehydration; forms homo- or heterodimers in a kinase active dependent manner.	CYTOSOLIC ABA RECEPTOR KINASE 11 (CARK11)	CYTOSOLIC ABA RECEPTOR KINASE 11 (CARK11)	S	353	1.5451	1.44344	1.0786	1.07292	-0.823778	-1.47126	0.173468	0.495054	0.921014	0.56934	0.481108	0.20212	-1.05499	-3.00321	1.07924	0.791273	-3.35507	3	___1	+	Col-0_W_Col-0_D					1	9.10614e-22	165.47	153.62	165.47	-0.69928	3746100000	353	0.0112523	1.69165	3.60842	0.395663	0.878732	0.928712	0.200413	1.77987	1.47428	AT1G48210.7;AT1G48210.3;AT1G48210.2;AT1G48210.1;AT3G17410.2;AT3G17410.1	353;353;353;353;354;354
AT1G48240	member of NPSN Gene Family, TGN/PM localization.	NOVEL PLANT SNARE 12 (NPSN12)	NOVEL PLANT SNARE 12 (NPSN12); (ATNPSN12)	S	8	-0.344074	-0.571886	-1.17429	-0.303923	-1.24339	-1.18062	-0.283396	-0.568501	-1.18002	-3.69248	-4.38198	-1.18369	-3.09093	-0.901718	-0.890579	-0.345697	-0.742697	3	___1							1	1.85974e-07	124.86	111.27	117.31	-0.31342	258410000	8	0.502129	0.220435	0.713853	0.215078	0.906467	1.41914	0.832203	0.0611142	0.223212	AT1G48240.1	8
AT1G48370	Arabidopsis thaliana metal-nicotianamine transporter YSL4	YELLOW STRIPE LIKE 8 (YSL8)	YELLOW STRIPE LIKE 8 (YSL8)	S	398	-3.18304	-2.91762	-2.89277	-3.10363	-3.22892	-1.29068	-1.80697	-1.87318	-2.68957	-2.93971	-3.06612	-2.46152	-2.0572	-2.37084	-3.10489	-3.55626	-2.57176	3	___1							0.999907	4.98256e-07	109.25	93.135	109.25	0.33496	229630000	398	0.0594687	-0.974328	-2.31976	0.643084	0.246585	0.492719	0.840856	0.0533724	0.211488	AT1G48370.1;AT1G48370.2	398;235
AT1G48370	Arabidopsis thaliana metal-nicotianamine transporter YSL4	YELLOW STRIPE LIKE 8 (YSL8)	YELLOW STRIPE LIKE 8 (YSL8)	S	25	-0.727999	-1.41219	-2.41132	-2.87282	-3.87605	-3.61347	-2.20093	0.250677	-1.09641	-1.43128	-0.983755	-0.086916	-1.4842	-0.359358	-3.01936	-2.38547	-3.59919	3	___1							0.965183	0.000409111	79.177	72.146	79.177	1.1622	123410000	25	0.651816	0.503861	0.474654	0.203483	-1.71645	-1.46242	0.135213	1.14526	1.7799	AT1G48370.1	25
AT1G48600	Encodes a phosphoethanolamine N-methyltransferase that catalyses the last two methylation steps of the three sequential methylations of phosphoethanolamine (PEA) that are required for the synthesis of phosphocholine (PCho) in plants.	PHOSPHOETHANOLAMINE N-METHYLTRANSFERASE (PMEAMT)	PHOSPHOETHANOLAMINE N-METHYLTRANSFERASE (PMEAMT);PHOSPHOETHANOLAMINE METHYLTRANSFERASE2 (ATPMT2); (AtPMEAMT)	S	19	-3.18128	-2.74011	-3.29367	-3.16054	0.134888	-0.230003	-2.48309	-3.0231	-2.48863	-3.15338	-3.33204	-2.96079	-2.49251	-2.93902	-3.81863	-2.28131	-3.36021	3	___1							0.991935	2.63701e-32	182.97	160.44	182.97	-1.0327	85594000	19	0.079054	-1.69357	-2.11291	0.199783	1.39711	1.47673	NaN	0	NaN	AT1G48600.1;AT1G48600.2	19;35
AT1G48620	This gene is predicted to encodes a histone H1/H5 family member. A plant line expressing an RNAi construct targeted against HON5 shows a reduced level of agrobacterium-mediated root transformation.	HIGH MOBILITY GROUP A5 (HON5)	HIGH MOBILITY GROUP A5 (HON5)	S	253	-0.36618	-2.40731	-2.05014	-4.31096	0.69809	-1.31314	-3.6213	-1.81417	-0.991635	-0.873299	-1.87827	0.167982	-3.27419	0.327808	-1.19456	-0.878359	-3.92454	3	___1							0.810878	1.36614e-21	166.29	154.02	55.839	0.070566	506850000	253	0.544754	-0.77102	-0.641756	0.700439	-0.586496	-0.407591	0.829438	-0.284493	-0.226966	AT1G48620.1	253
AT1G48620	This gene is predicted to encodes a histone H1/H5 family member. A plant line expressing an RNAi construct targeted against HON5 shows a reduced level of agrobacterium-mediated root transformation.	HIGH MOBILITY GROUP A5 (HON5)	HIGH MOBILITY GROUP A5 (HON5)	S	263	-2.95559	-2.47672	-2.98223	-2.39101	-1.64008	-0.72084	-3.6347	-3.01162	-2.1951	-3.0366	-2.85496	-3.52663	-3.29687	-2.98581	-3.14231	-2.3375	-3.54507	2	___1							0.957952	1.35565e-06	122.64	84.005	85.45	0.24698	39574000	263	0.531253	-0.449576	-0.664183	0.254171	1.01796	1.28787	NaN	0	NaN	AT1G48620.1	263
AT1G48620	This gene is predicted to encodes a histone H1/H5 family member. A plant line expressing an RNAi construct targeted against HON5 shows a reduced level of agrobacterium-mediated root transformation.	HIGH MOBILITY GROUP A5 (HON5)	HIGH MOBILITY GROUP A5 (HON5)	S	334	-3.76964	2.81184	2.69853	-2.93834	2.03996	0.145586	4.14668	4.56818	3.61643	3.4208	3.69894	3.94346	3.87728	4.14499	2.78861	2.77001	-3.42506	4	___1							0.946749	3.89396e-20	131.94	111.68	75.047	0.18787	4312700000	334	0.189749	-3.0245	-1.47852	0.344762	-1.26347	-1.04292	0.7253	-1.01059	-0.371769	AT1G48620.1	334
AT1G48840	Plant protein of unknown function (DUF639);(source:TAIR10)	0	0	S	438	-0.778036	-2.14071	-3.21081	-3.00531	0.33997	0.00479889	-0.441349	-3.65654	-3.76047	-3.82003	-4.57469	-3.48712	0.0983543	-2.14456	-3.32907	-2.76884	-3.48833	3	___1							0.918809	2.29856e-16	138.9	121.48	138.9	1.2425	156220000	438	0.256687	-1.34544	-1.2534	0.545106	0.906162	0.648764	0.23718	0.911696	1.34244	AT1G48840.1	438
AT1G48920	Encodes ATNUC-L1 (NUCLEOLIN LIKE 1), the predominant form of the two nucleolin proteins found in Arabidopsis. This protein is involved in rRNA processing, ribosome biosynthesis, and vascular pattern formation. PARL1 localizes to the nucleolus and parl1 mutants accumulate elevated levels of the unspliced 35S pre-rRNA. parl1 mutants also have defects in cotyledon, leaf, sepal, and petal vein patter…	NUCLEOLIN LIKE 1 (NUC-L1)	NUCLEOLIN LIKE 1 (ATNUC-L1);PARALLEL 1 (PARL1);NUCLEOLIN LIKE 1 (NUC-L1);NUCLEOLIN 1 (NUC1)	S	413	1.0758	0.345142	0.382116	0.323914	-0.288977	-0.176764	0.229134	1.46057	1.05726	1.36665	1.4444	0.813189	0.858809	1.49814	0.441004	1.02188	1.23892	2	___1							0.999964	2.7003e-15	180.09	163.42	180.09	0.13554	721150000	413	0.626178	0.225753	0.513163	0.200137	-0.750723	-1.47535	0.263915	-0.368856	-1.25808	AT1G48920.1	413
AT1G49040	Encodes soluble protein containing N-terminal DENN domain and eight C-terminal WD-40 repeats. Involved in cytokinesis of guard mother cells and leaf epidermal cells. The overall growth and development of mutant plants is severely affected, they are smaller than wt, with defects in seedling development, leaf expansion and flower morphology which renders the mutant conditionally sterile.	STOMATAL CYTOKINESIS-DEFECTIVE 1 (SCD1)	STOMATAL CYTOKINESIS-DEFECTIVE 1 (SCD1)	S	770	-0.204617	-0.734909	-1.02835	-0.131214	-1.42406	-1.10214	-0.174305	-0.828739	0.0510759	0.145515	-0.190046	-0.262201	-1.17499	-0.547771	-0.25416	-1.33516	-0.639881	2	___1							0.999997	2.11393e-08	127.71	102.33	125.28	1.3501	290860000	770	0.335704	0.357541	1.04636	0.592984	-0.220657	-0.570557	0.578009	0.218295	0.594577	AT1G49040.4;AT1G49040.2;AT1G49040.3;AT1G49040.1	770;770;770;770
AT1G49340	Encodes a phosphatidylinositol 4-kinase that is expressed in inflorescences and shoots.	(ATPI4K ALPHA)	(ATPI4K ALPHA)	S	1104	1.72782	1.3415	0.815937	1.42073	1.95469	1.5606	1.52554	2.12007	1.45731	-4.28575	1.64463	-2.79243	0.846245	-3.27754	1.35252	1.95282	-2.39137	3	___1			+	Col-0_D_ost1_D			0.988458	2.31782e-13	133.61	119.76	100.06	1.429	1579700000	1104	0.101192	-0.463729	-1.93463	0.0239123	3.53147	3.2031	0.418324	1.02184	0.881655	AT1G49340.4;AT1G49340.3;AT1G49340.2;AT1G49340.1	1104;1104;1111;1111
AT1G49340	Encodes a phosphatidylinositol 4-kinase that is expressed in inflorescences and shoots.	(ATPI4K ALPHA)	(ATPI4K ALPHA)	S	265	-3.64111	-3.61432	-3.33098	-2.95845	0.0377979	-0.056118	-1.95685	-3.21533	-0.882392	-1.95892	-0.910488	-1.96759	-3.20679	-1.50293	-3.34958	-2.49184	-1.65012	2	___1	+	Col-0_W_Col-0_D					0.9082	1.20508e-53	218.25	189.92	218.25	-1.1714	153110000	265	0.040629	-2.08859	-2.60061	0.406305	0.928141	0.906355	0.10604	-0.889035	-1.96915	AT1G49340.4;AT1G49340.3;AT1G49340.2;AT1G49340.1	265;265;265;265
AT1G49340	Encodes a phosphatidylinositol 4-kinase that is expressed in inflorescences and shoots.	(ATPI4K ALPHA)	(ATPI4K ALPHA)	S	224	-2.58969	-2.46658	-2.67999	-2.65245	-3.56853	-1.19227	-3.68744	-2.35978	-2.9741	-3.24529	-3.89814	-3.7491	-3.42416	-4.13927	-3.36785	-3.53694	-3.80084	3	___1					+	Col-0_W_5A-1_W	0.999864	0.000135586	85.573	74.273	85.573	-0.77825	28777000	224	0.864315	0.104827	0.178353	0.194877	1.06884	1.4961	0.000456182	0.971363	8.13307	AT1G49340.4;AT1G49340.3;AT1G49340.2;AT1G49340.1	224;224;224;224
AT1G49380	cytochrome c biogenesis protein family;(source:Araport11)	0	0	S	60	0.879141	0.141426	0.222424	0.776678	-2.4601	-3.71738	0.0230446	1.58652	1.04901	0.0272217	1.95193	-2.77807	-2.5251	-3.1575	0.674112	0.850142	0.795481	2	___1							0.999531	2.75538e-30	189.77	151.16	182.34	0.92641	637720000	60	0.222722	1.6469	1.35996	0.291531	1.67825	1.17875	0.290515	-0.268328	-1.18155	AT1G49380.1	60
AT1G49710	Encodes a protein with core &alpha;1,3-fucosyltransferase activity.	FUCOSYLTRANSFERASE 12 (FUT12)	FUCOSYLTRANSFERASE 12 (FUT12); (ATFUT12); (FUCTB); (FUCT2)	S	25	0.607113	-0.0971298	-0.312771	-0.148773	-3.71988	-1.3968	-0.0800667	0.0564346	0.251849	0.155745	0.0633888	-2.45312	-0.722155	-0.00890732	-0.391022	-0.319784	-0.292509	3	___1							0.989456	8.77656e-12	115.05	105.85	115.05	-0.95099	346530000	25	0.198971	1.29719	1.44356	0.859506	-0.223687	-0.186335	0.211792	0.346548	1.43118	AT1G49710.1	25
AT1G49730	Protein kinase superfamily protein;(source:Araport11)	0	0	S	475	-0.840199	-3.3403	-2.56496	-3.28672	-3.46589	-3.25578	-2.59877	-1.10776	-1.30422	-0.398212	-1.25	-2.92663	-3.33986	-3.64016	-3.63667	-3.71058	-3.87649	2	___1							0.945105	0.00013019	97.631	47.277	97.631	0.32799	49063000	475	0.904368	0.0990055	0.125314	0.336243	0.695165	1.06339	0.135193	1.2332	1.78001	AT1G49730.4;AT1G49730.1	475;505
AT1G50120	Encodes a Golgi-localized protein which regulates pollen tube growth. Required for TGN formation and Golgi structure maintenance.	LOSS OF TGN (LOT)	LOSS OF TGN (LOT)	S	264	-3.20019	-1.36893	-1.55728	-1.83142	-2.80378	-2.3606	-1.67343	-1.80662	-1.56945	-1.14067	-4.11049	-2.90218	-0.962656	-1.55439	-1.69479	-1.24268	-1.9523	2	___1							0.987601	0.000658242	87.18	47.263	87.18	-0.055658	195270000	264	0.737981	0.171651	0.350443	0.561548	-0.354698	-0.621431	0.520356	-0.359532	-0.690952	AT1G50120.1;AT1G50120.2	264;264
AT1G50120	Encodes a Golgi-localized protein which regulates pollen tube growth. Required for TGN formation and Golgi structure maintenance.	LOSS OF TGN (LOT)	LOSS OF TGN (LOT)	S	267	0.534908	-3.04519	0.0116615	-2.85667	-3.26865	-3.97193	0.719257	-2.74886	0.750171	0.970728	0.847433	0.265867	-2.98163	0.310825	0.186974	-0.477709	-2.71837	2	___1							0.990111	5.17266e-15	164.2	139.94	146.96	-0.33537	392710000	267	0.511364	0.978725	0.697903	0.368535	-1.5159	-0.98797	0.810864	-0.335788	-0.252284	AT1G50120.1;AT1G50120.2	267;267
AT1G50480	10-formyltetrahydrofolate synthetase (THFS) mRNA, complete The mRNA is cell-to-cell mobile.	10-FORMYLTETRAHYDROFOLATE SYNTHETASE (THFS)	10-FORMYLTETRAHYDROFOLATE SYNTHETASE (THFS)	S	12	0.613142	0.476645	0.196278	0.641775	0.847071	0.0558453	1.04175	1.53281	0.414317	-0.0443592	0.509081	-1.55914	1.18201	-3.06226	0.0315723	0.354542	0.248335	3	___1							1	4.01961e-48	215.86	209.28	215.86	0.30804	978010000	12	0.27638	-0.387409	-1.1972	0.12668	2.01583	1.83054	0.119819	0.270477	1.87385	AT1G50480.1	12
AT1G50600	Encodes a scarecrow-like protein (SCL5). Member of GRAS gene family.	0	0	S	85	0.825491	0.0654297	-0.231894	0.451944	-0.0460167	-0.422602	1.20438	1.51602	0.13873	-3.37665	-0.440329	-0.189587	-2.75648	0.835922	0.10783	0.127165	0.511206	3	___1							0.99949	1.57595e-24	143.01	137.95	111.52	-0.52762	543580000	85	0.605987	-0.285202	-0.544097	0.283118	1.26633	1.20218	0.925123	0.0290093	0.0988164	AT1G50600.3;AT1G50600.1;AT1G50600.2	85;156;160
AT1G50620	A specific subunit of MINU1/2-associated SWI/SNF (MAS) complexes (PMID:36189880 and PMID:36471048).	ONE PHD FINGERS 1 (OPF1)	PHD DOMAIN-CONTAINING MAS SUBUNIT 1A (PMS1A);ONE PHD FINGERS 1 (OPF1)	S	613	-0.915648	-0.484556	-0.662729	-0.641375	-1.13946	-1.38441	-0.728464	-1.4778	-1.49936	-1.34126	-1.74169	-0.218695	-1.36399	-0.138594	-0.667906	-1.10454	-0.99029	3	___1	+	Col-0_W_Col-0_D					0.970951	4.47957e-07	90.974	81.004	90.974	0.36614	1763400000	613	0.0369757	0.506455	2.67103	0.175421	-0.608771	-1.57789	0.168119	0.244836	1.61089	AT1G50620.1	613
AT1G51140	Encodes a basic helix-loop-helix-type transcription factor involved in photoperiodism flowering. Binds to the E-box cis-element in the CONSTANS (CO) promoter to regulate flowering. Interacts with CFL1 and along with CFLAP2 negatively regulates cuticle development. Binds to the potassium channel gene KAT1 as a dimer. The DNA-binding capacity is inhibited in response to ABA through phosphorylation-…	FLOWERING BHLH 3 (FBH3)	FLOWERING BHLH 3 (FBH3);ABA-RESPONSIVE KINASE SUBSTRATE 1 (AKS1);ATCFL1 ASSOCIATED PROTEIN 1 (CFLAP1)	S	213	-0.925579	-1.35012	-1.14339	-1.15359	0.588964	1.19777	2.69373	-0.02034	-2.64561	-2.7907	-3.98325	0.552774	-0.44348	0.0672512	-1.20448	-2.37211	-0.727573	2	___1	+	Col-0_W_Col-0_D					1	1.08917e-40	225.7	205.5	225.7	0.40497	1608400000	213	0.00858317	-2.2582	-3.83757	0.207321	1.05618	1.44784	0.519828	0.29155	0.691868	AT1G51140.1	213
AT1G51140	Encodes a basic helix-loop-helix-type transcription factor involved in photoperiodism flowering. Binds to the E-box cis-element in the CONSTANS (CO) promoter to regulate flowering. Interacts with CFL1 and along with CFLAP2 negatively regulates cuticle development. Binds to the potassium channel gene KAT1 as a dimer. The DNA-binding capacity is inhibited in response to ABA through phosphorylation-…	FLOWERING BHLH 3 (FBH3)	FLOWERING BHLH 3 (FBH3);ABA-RESPONSIVE KINASE SUBSTRATE 1 (AKS1);ATCFL1 ASSOCIATED PROTEIN 1 (CFLAP1)	S	157	-2.63075	-2.41039	-2.69556	-3.24311	0.678705	0.446306	1.45868	-0.207977	-1.83922	-4.1242	-2.42162	-2.73382	0.689482	-3.32516	-3.92982	-2.68537	-3.48556	2	___1	+	Col-0_W_Col-0_D					0.989465	1.54065e-17	147.64	133.62	144.58	0.6277	258950000	157	0.000133128	-3.33888	-8.63196	0.0872693	2.38376	2.12213	NaN	0	NaN	AT1G51140.1	157
AT1G51140	Encodes a basic helix-loop-helix-type transcription factor involved in photoperiodism flowering. Binds to the E-box cis-element in the CONSTANS (CO) promoter to regulate flowering. Interacts with CFL1 and along with CFLAP2 negatively regulates cuticle development. Binds to the potassium channel gene KAT1 as a dimer. The DNA-binding capacity is inhibited in response to ABA through phosphorylation-…	FLOWERING BHLH 3 (FBH3)	FLOWERING BHLH 3 (FBH3);ABA-RESPONSIVE KINASE SUBSTRATE 1 (AKS1);ATCFL1 ASSOCIATED PROTEIN 1 (CFLAP1)	S	284	-3.22763	-2.93923	-2.62346	-2.71965	-1.39121	0.371399	-1.34966	-1.12368	-3.61326	-4.29765	-4.04225	-3.0966	-2.8146	-3.48148	-2.53914	-2.64279	-2.02086	3	___1	+	Col-0_W_Col-0_D	+	Col-0_D_ost1_D			1	4.19694e-05	101.2	77.722	79.81	-0.70805	291060000	284	0.00387033	-2.00421	-4.55524	0.00750698	2.2576	4.32893	NaN	0	NaN	AT1G51140.1	284
AT1G51140	Encodes a basic helix-loop-helix-type transcription factor involved in photoperiodism flowering. Binds to the E-box cis-element in the CONSTANS (CO) promoter to regulate flowering. Interacts with CFL1 and along with CFLAP2 negatively regulates cuticle development. Binds to the potassium channel gene KAT1 as a dimer. The DNA-binding capacity is inhibited in response to ABA through phosphorylation-…	FLOWERING BHLH 3 (FBH3)	FLOWERING BHLH 3 (FBH3);ABA-RESPONSIVE KINASE SUBSTRATE 1 (AKS1);ATCFL1 ASSOCIATED PROTEIN 1 (CFLAP1)	S	290	1.65709	1.13457	0.901411	1.37131	5.10798	5.21871	5.46011	4.62266	2.69786	1.02086	2.02118	4.87484	5.7741	4.75175	1.34532	1.64745	2.23025	2	___1	+	Col-0_W_Col-0_D					0.999765	2.95169e-140	370.7	343.93	333.77	-0.2412	8156300000	290	3.72246e-06	-3.83627	-16.046	0.93058	-0.0312004	-0.09159	0.161964	-0.474911	-1.63984	AT1G51140.1	290
AT1G51140	Encodes a basic helix-loop-helix-type transcription factor involved in photoperiodism flowering. Binds to the E-box cis-element in the CONSTANS (CO) promoter to regulate flowering. Interacts with CFL1 and along with CFLAP2 negatively regulates cuticle development. Binds to the potassium channel gene KAT1 as a dimer. The DNA-binding capacity is inhibited in response to ABA through phosphorylation-…	FLOWERING BHLH 3 (FBH3)	FLOWERING BHLH 3 (FBH3);ABA-RESPONSIVE KINASE SUBSTRATE 1 (AKS1);ATCFL1 ASSOCIATED PROTEIN 1 (CFLAP1)	S	234	-1.91035	-3.12744	-2.44168	-2.8056	-0.151966	0.517273	0.754299	-0.24494	-1.35677	-1.4641	-3.09953	1.03874	0.787556	0.528513	-2.60148	-2.58598	-2.76414	2	___1	+	Col-0_W_Col-0_D					0.999996	4.57358e-10	136.49	118.12	116.37	0.1909	1121800000	234	0.00023874	-2.78993	-7.7723	0.133596	-0.566269	-1.78924	0.809888	0.0792689	0.253619	AT1G51140.1	234
AT1G51140	Encodes a basic helix-loop-helix-type transcription factor involved in photoperiodism flowering. Binds to the E-box cis-element in the CONSTANS (CO) promoter to regulate flowering. Interacts with CFL1 and along with CFLAP2 negatively regulates cuticle development. Binds to the potassium channel gene KAT1 as a dimer. The DNA-binding capacity is inhibited in response to ABA through phosphorylation-…	FLOWERING BHLH 3 (FBH3)	FLOWERING BHLH 3 (FBH3);ABA-RESPONSIVE KINASE SUBSTRATE 1 (AKS1);ATCFL1 ASSOCIATED PROTEIN 1 (CFLAP1)	S	30	-3.69224	-1.68641	-2.78306	-2.62856	1.71397	1.99145	1.56521	-3.8161	-2.87719	-3.60255	-2.77086	0.302082	-3.55981	0.408451	-2.34375	-3.42567	-3.67183	3	___1							1	2.27863e-53	216.7	208.56	174.53	-0.17394	6815800000	30	0.0800739	-3.0612	-2.10364	0.53652	1.31339	0.663251	NaN	0	NaN	AT1G51140.1	30
AT1G51450	Nuclear protein required for early embryogenesis. Encodes a structural core component of a COMPASS-like H3K4 histone methylation complex that is also involved in the timing of the floral transition and in leaf morphogenesis. Mutants are decreased in H3K4 histone trimethylation.	TRAUCO (TRO)	ARABIDOPSIS ASH2 RELATIVE (ASH2R);TRAUCO (TRO); (TRAUCO)	S	144	-0.438097	-1.08032	-1.1321	-1.13786	-2.97741	-3.12515	-2.56359	-4.04954	-0.919814	-3.14326	-1.41936	-1.68007	-3.37806	-0.689882	-0.893103	-0.918272	-3.0756	3	___1	+	Col-0_W_Col-0_D					0.884813	0.00756011	50.593	37.138	50.593	0.38187	137230000	144	0.000774212	2.23183	6.25536	0.154924	-1.26292	-1.67431	0.333881	0.681899	1.06914	AT1G51450.1	144
AT1G51500	Encodes an ABC transporter involved in cuticular wax biosynthesis. Lines carrying recessive mutations in this locus have weakly glaucous stem surface, and relative elevated secondary alcohols and ketones.	ATP-BINDING CASSETTE G12 (ABCG12)	WHITE-BROWN COMPLEX 12 (WBC12);ECERIFERUM 5 (CER5); (D3);ATP-BINDING CASSETTE G12 (ABCG12); (AtABCG12);ARABIDOPSIS THALIANA WHITE-BROWN COMPLEX 12 (ATWBC12)	S	677	0.56004	-0.361359	-0.146214	-2.28507	-0.784523	-0.202982	-1.16934	-3.34234	-2.55408	-2.53309	0.0455894	-1.11529	-3.23687	-1.05921	-0.742098	-0.279697	-2.49681	2	___1							0.902896	2.95046e-14	148.19	125.31	103.88	-2.3972	370760000	677	0.407133	0.816645	0.891209	0.688237	0.428995	0.425394	0.531509	0.614718	0.671779	AT1G51500.1	677
AT1G51500	Encodes an ABC transporter involved in cuticular wax biosynthesis. Lines carrying recessive mutations in this locus have weakly glaucous stem surface, and relative elevated secondary alcohols and ketones.	ATP-BINDING CASSETTE G12 (ABCG12)	WHITE-BROWN COMPLEX 12 (WBC12);ECERIFERUM 5 (CER5); (D3);ATP-BINDING CASSETTE G12 (ABCG12); (AtABCG12);ARABIDOPSIS THALIANA WHITE-BROWN COMPLEX 12 (ATWBC12)	S	684	-0.215551	-0.060564	-0.399601	-0.276604	-0.820601	0.33	-0.50395	0.144817	0.408557	0.30723	0.178513	-0.358112	-1.14384	-3.24482	-0.222502	0.183439	-0.701481	2	___1							0.999508	5.27189e-16	163.35	144.73	151.39	-0.54072	1249100000	684	0.929834	-0.0256467	-0.091815	0.142923	1.36982	1.73686	0.971022	0.00876776	0.0381799	AT1G51500.1	684
AT1G51500	Encodes an ABC transporter involved in cuticular wax biosynthesis. Lines carrying recessive mutations in this locus have weakly glaucous stem surface, and relative elevated secondary alcohols and ketones.	ATP-BINDING CASSETTE G12 (ABCG12)	WHITE-BROWN COMPLEX 12 (WBC12);ECERIFERUM 5 (CER5); (D3);ATP-BINDING CASSETTE G12 (ABCG12); (AtABCG12);ARABIDOPSIS THALIANA WHITE-BROWN COMPLEX 12 (ATWBC12)	S	661	1.75163	1.17476	1.07889	-3.26836	0.491436	0.776731	-2.85416	1.57836	2.04081	2.32699	1.86789	0.542435	0.43125	1.48379	0.820778	-3.29162	1.0386	2	___1							0.999999	3.87728e-05	110.66	85.103	93.011	-0.24551	1550700000	661	0.906393	0.186139	0.122646	0.521137	-0.821065	-0.6896	0.729571	0.661644	0.365672	AT1G51500.1	661
AT1G51510	This gene is predicted to encode a protein involved in the exon junction complex. Though there is a predicted RNA binding motif, in the Drosophila ortholog (33% identity), this motif mediates interactions with Mago and is not available for RNA binding. The Arabidopsis Y14 protein appears to be predominantly nucleolar, but there is also some evidence for its presence in the cytoplasm.	(Y14)	(Y14)	S	32	0.633364	0.183449	0.00778389	-2.83938	-2.66882	-3.70545	1.09099	0.93479	0.563697	-2.49889	-3.71122	-3.65458	-1.01019	-2.93201	-3.22433	-3.79288	-2.73865	3	___1					+	Col-0_W_5A-1_W	0.999984	2.34783e-12	103.35	92.838	103.35	0.2581	803030000	32	0.703788	0.583424	0.398884	0.40765	1.44514	0.903564	0.0363396	2.74826	2.83781	AT1G51510.1	32
AT1G51510	This gene is predicted to encode a protein involved in the exon junction complex. Though there is a predicted RNA binding motif, in the Drosophila ortholog (33% identity), this motif mediates interactions with Mago and is not available for RNA binding. The Arabidopsis Y14 protein appears to be predominantly nucleolar, but there is also some evidence for its presence in the cytoplasm.	(Y14)	(Y14)	S	74	-2.75751	-3.18517	-2.9589	-3.28769	0.925947	1.15562	0.632849	0.553211	-0.222291	-0.470449	-0.581116	-3.42245	1.1406	0.786009	-0.656214	-0.903212	-0.71426	3	___1	+	Col-0_W_Col-0_D			+	Col-0_W_5A-1_W	0.997725	0.000346976	81.574	69.267	81.144	-0.6996	385010000	74	7.17713e-07	-3.86423	-21.2018	0.336213	1.31552	1.06346	2.45165e-05	-2.28942	-14.9153	AT1G51510.1	74
AT1G51600	member of a novel family of plant-specific GATA-type transcription factors.	ZIM-LIKE 2 (ZML2)	ZIM-LIKE 2 (ZML2); (TIFY2A);GATA TRANSCRIPTION FACTOR 28 (GATA28)	S	267	-1.76206	-2.99487	-2.37852	-2.09485	-1.5641	-1.43068	-1.54652	-1.93583	-1.98964	-1.37161	-2.72525	-2.64458	-1.12397	-0.839918	-1.13324	-1.57717	-1.67905	2	___1							0.996532	0.000174166	89.613	67.868	89.613	1.1263	112070000	267	0.051304	-0.688291	-2.42797	0.870985	-0.0831269	-0.170924	0.0554127	-0.844418	-2.48628	AT1G51600.2;AT1G51600.1	267;267
AT1G51600	member of a novel family of plant-specific GATA-type transcription factors.	ZIM-LIKE 2 (ZML2)	ZIM-LIKE 2 (ZML2); (TIFY2A);GATA TRANSCRIPTION FACTOR 28 (GATA28)	S	125	0	-0.571737	-0.444281	-1.2699	-0.898928	-0.68438	-0.88249	0.0128593	-0.225429	-0.431683	-1.06438	-3.27587	-1.75269	-0.0745144	-2.88453	-3.15985	-2.06829	3	___1					+	Col-0_W_5A-1_W	1	0.00031345	82.477	68.116	52.483	-0.099589	250080000	125	0.906084	0.0417552	0.123052	0.239026	1.08779	1.33634	0.0036419	2.13274	5.14112	AT1G51600.2;AT1G51600.1	125;125
AT1G51690	55 kDa B regulatory subunit of phosphatase 2A mRNA,	0	0	S	469	2.85338	-3.37171	-3.30385	-3.45259	2.27746	1.52454	2.28263	-3.47937	2.90362	-2.73687	-3.15751	-2.83046	-2.74065	2.22276	-3.74741	-4.01537	-2.25829	2	___1							0.886189	1.47978e-32	190.24	166.4	164.01	0.92807	1144500000	469	0.281278	-2.47001	-1.18376	0.449717	1.76743	0.81963	0.459309	1.52167	0.801334	AT1G51690.2;AT1G51690.4;AT1G51690.1;AT1G51690.3;AT1G51690.5	469;470;470;560;567
AT1G51690	55 kDa B regulatory subunit of phosphatase 2A mRNA,	0	0	S	471	0.637947	-0.0462132	-0.234364	-0.193113	-2.83285	1.32194	-0.546453	0.278505	0.667325	0.970423	0.592794	-0.172363	0.0722446	-3.30122	0.281487	0.362871	-3.00175	2	___1							0.997187	4.83266e-57	236.27	213.13	214.46	2.2113	546820000	471	0.61116	0.485777	0.536118	0.639849	0.689068	0.497637	0.427445	0.826861	0.863276	AT1G51690.2;AT1G51690.4;AT1G51690.1;AT1G51690.3;AT1G51690.5	471;472;472;562;569
AT1G51690	55 kDa B regulatory subunit of phosphatase 2A mRNA,	0	0	S	466	0.295433	0.570889	-2.26884	-0.00353432	0.0714626	-1.83354	-3.1912	-3.88627	0.466161	-0.279394	-0.246092	0.580704	-2.97408	0.190018	0.300091	-2.64603	-0.168947	3	___1							0.815523	1.31896e-32	187.89	160.99	149.84	0.096223	1160300000	466	0.138272	1.85837	1.7092	0.339127	-1.47543	-1.05641	0.672281	0.486781	0.448914	AT1G51690.2;AT1G51690.4;AT1G51690.1;AT1G51690.3;AT1G51690.5	466;467;467;557;564
AT1G51805	Leucine-rich repeat protein kinase family protein;(source:Araport11)	STRESS INDUCED FACTOR 3 (SIF3)	STRESS INDUCED FACTOR 3 (SIF3)	S	528	3.31755	2.81302	3.23178	2.37942	1.54184	0.465662	1.95506	0.383286	-0.446504	-2.31713	-1.31774	0.793934	-3.30475	1.09809	3.04696	3.11547	1.2886	2	___1	+	Col-0_W_Col-0_D					0.99978	1.13776e-28	190.55	140.4	159.54	1.0213	4880900000	528	0.00611442	1.84898	4.13475	0.276355	1.55737	1.22147	0.457618	0.451766	0.804538	AT1G51805.2;AT1G51805.1	528;552
AT1G52040	Encodes myrosinase-binding protein expressed in flowers.	MYROSINASE-BINDING PROTEIN 1 (MBP1)	MYROSINASE-BINDING PROTEIN 1 (MBP1); (ATMBP)	S	323	-3.33998	-3.07104	-2.75403	-2.67617	-2.26538	-2.43028	-3.48549	-1.29791	-3.10727	-3.31943	-3.1926	-1.03647	-1.24551	-1.61984	-2.84478	-3.57488	-2.91109	2	___1							1	0.000613306	81.144	65.572	81.144	-1.6854	47340000	323	0.258611	-0.59054	-1.24775	0.109	-1.06916	-1.94763	NaN	0	NaN	AT1G52040.1;AT1G52030.3;AT1G52030.2;AT1G52030.1	323;503;503;503
AT1G52190	Encodes a low affinity nitrate transporter that is expressed in the plasma membrane and found in the phloem of the major veins of leaves. It is responsible for nitrate redistribution to young leaves.	NRT1/ PTR FAMILY 1.2 (NPF1.2)	NITRATE TRANSPORTER 1.11 (NRT1.11);NRT1/ PTR FAMILY 1.2 (NPF1.2); (ATNPF1.2)	S	601	-1.57923	-3.54061	-1.61193	-3.16074	-3.1608	-2.76005	-4.06862	-2.45457	-1.08233	-0.428322	-1.90956	-2.40204	-3.11461	-1.32008	-1.88478	-1.19347	-2.53374	2	___1							1	0.0113897	68.657	38.914	59.067	0.58343	73114000	601	0.343896	0.637885	1.02731	0.225472	-0.8321	-1.38219	0.42097	-0.602463	-0.876292	AT1G52190.1	601
AT1G52220	Thylakoid membrane localized protein that interacts with other CURT family proteins. Oligomerization is associated with grana thylakoid curavature.	CURVATURE THYLAKOID 1C (CURT1C)	CURVATURE THYLAKOID 1C (CURT1C)	S	57	0.993362	-0.5172	0.0941525	-3.5063	1.26372	1.25253	-0.216578	0.630131	0.85081	-3.43509	1.42312	-0.587524	1.41705	-0.467409	-0.280771	-0.650381	0.0944347	2	___1							0.98241	7.03192e-113	291.08	265.88	291.08	-0.38439	1395900000	57	0.206469	-1.46645	-1.41623	0.411106	0.611745	0.89642	0.712693	-0.455091	-0.389861	AT1G52220.4;AT1G52220.1	57;57
AT1G52320	kinesin-like protein;(source:Araport11)	0	0	S	290	1.46716	1.75181	1.43375	0.704147	0.37047	0.277689	1.23475	1.35386	1.00284	1.56611	0.966928	1.55735	0.520073	1.45544	1.52735	1.18146	0.918087	3	___1							0.998552	1.09062e-12	148.66	123.27	53.169	0.49586	1390900000	290	0.190918	0.530024	1.474	0.433609	-0.36843	-0.851026	0.684935	0.130251	0.430239	AT1G52320.4;AT1G52320.3;AT1G52320.1;AT1G52320.5;AT1G52320.2	290;290;593;616;616
AT1G52380	NUP50 (Nucleoporin 50 kDa) protein;(source:Araport11)	0	0	S	33	-0.841988	-1.32974	-1.53736	-1.8119	-1.16466	-1.9372	-0.853006	-1.05761	-1.36083	-1.56229	-1.3312	0.320185	0.018486	-0.542383	-1.24762	-1.33635	-1.9055	3	___1			+	Col-0_D_ost1_D			0.999959	4.22324e-30	193.85	164.57	172.74	-0.4363	746750000	33	0.698922	-0.12713	-0.405861	0.0197902	-1.18521	-3.3746	0.712011	0.116241	0.390844	AT1G52380.4;AT1G52380.3;AT1G52380.2;AT1G52380.1	33;33;33;33
AT1G52380	NUP50 (Nucleoporin 50 kDa) protein;(source:Araport11)	0	0	S	114	0.132406	0.157642	0.0475693	0.00463295	0.410652	-0.11128	0.624599	0.0349045	-0.721295	-0.750572	-0.745073	0.693655	0.047102	0.167805	-0.212946	-0.333838	-0.0435581	3	___1					+	Col-0_W_5A-1_W	1	1.30354e-58	226.65	203.26	213.41	-0.28196	7015100000	114	0.40642	-0.154156	-0.892649	0.817701	-0.063135	-0.242943	0.0185327	0.282343	3.43512	AT1G52380.4;AT1G52380.3;AT1G52380.2;AT1G52380.1	114;114;114;114
AT1G52690	Intrinsically disordered protein that stabilizes lactate dehydrogenase (LDH) during drying and freezing.	LATE EMBRYOGENESIS ABUNDANT 7 (LEA7)	LATE EMBRYOGENESIS ABUNDANT 7 (LEA7)	S	114	-2.65799	-2.32588	-3.00358	-1.92268	2.83766	4.24472	0.740248	-4.30373	-3.09723	-2.93309	-3.13279	-2.67442	1.99873	-3.95455	-2.04261	-3.5273	-4.40554	2	___1							0.996566	1.45789e-26	203.99	169.3	143.67	0.88098	4867300000	114	0.125362	-3.35726	-1.78008	0.407789	2.42314	0.903274	0.241646	0.847619	1.32775	AT1G52690.2;AT1G52690.1	114;114
AT1G52780	Putative regeneration determinant regulated by TCSA.	0	0	S	1041	-1.64426	-0.453987	0.154921	-0.209465	-0.234255	-2.30556	-0.760838	-3.4315	-2.76734	-2.78244	-2.7031	-2.2099	-3.22973	-2.94657	-0.580978	-0.0297298	-2.45182	2	___1							0.999895	5.77571e-06	109.15	96.861	109.15	-0.78414	246710000	1041	0.215688	1.14484	1.38383	0.271537	1.11236	1.23547	0.556801	0.482647	0.629269	AT1G52780.1	1041
AT1G53050	Protein kinase superfamily protein;(source:Araport11)	0	0	S	599	-0.833206	-0.0917397	-0.893862	-0.656479	-3.77583	-2.98398	-2.71114	-2.23763	-0.71279	-0.784821	-1.17738	-1.84381	-4.42933	-1.0457	-0.526573	-0.842239	-1.92562	2	___1	+	Col-0_W_Col-0_D					0.999477	0.0113106	59.872	43.566	59.872	-1.3373	173100000	599	0.000789808	2.30832	6.23186	0.62454	-0.487534	-0.521107	0.300511	0.479324	1.1544	AT1G53050.2;AT1G53050.1	599;599
AT1G53165	Protein kinase superfamily protein;(source:Araport11)	(ATMAP4K ALPHA1)	(ATMAP4K ALPHA1)	S	653	-3.31372	1.04403	-3.14631	-2.53087	0.26923	0.471405	-2.83686	-3.66558	-3.57437	1.63994	1.53132	-3.35199	0.297106	-3.42031	1.15319	1.11947	1.2444	2	___1					+	Col-0_W_5A-1_W	0.918927	4.25267e-06	112.43	80.367	86.772	0.79571	434950000	653	0.723638	-0.546265	-0.370641	0.676362	0.717948	0.442871	0.0478991	-3.15907	-2.60603	AT1G53165.1;AT1G53165.2;AT1G53165.3	653;657;661
AT1G53165	Protein kinase superfamily protein;(source:Araport11)	(ATMAP4K ALPHA1)	(ATMAP4K ALPHA1)	S	420	1.39059	0.774271	0.855993	0.769241	-3.51211	-4.26206	1.53197	0.953089	1.31887	1.20483	1.31939	0.597282	1.19053	1.1642	1.26893	0.751677	1.49093	3	___1							0.999947	5.78566e-16	132.96	109.99	123.75	0.32034	779590000	420	0.181189	2.2698	1.51241	0.250374	-2.30628	-1.29977	0.420669	-0.222989	-0.876899	AT1G53165.1;AT1G53165.2;AT1G53165.3	420;424;428
AT1G53165	Protein kinase superfamily protein;(source:Araport11)	(ATMAP4K ALPHA1)	(ATMAP4K ALPHA1)	S	479	-2.93022	-3.87807	-2.71714	-2.76047	0.905508	0.763481	-0.242096	-0.64485	-0.44447	-2.68229	-3.17087	0.340673	2.21213	-0.77338	-2.93666	-1.44377	-1.41112	2	___1	+	Col-0_W_Col-0_D					0.993751	1.17064e-14	160.8	124.17	145.69	0.19305	334150000	479	0.000424965	-3.26699	-6.99549	0.661701	-0.397631	-0.464668	0.0841477	-1.14096	-2.15091	AT1G53165.1;AT1G53165.2;AT1G53165.3	479;483;487
AT1G53240	mMDH1 encodes a mitochrondrial malate dehydrogenase. It is expressed at higher levels than the other mitochrondrial isoform mMDH2 (At3G15020) according to transcript and proteomic analyses.	MITOCHONDRIAL MALATE DEHYDROGENASE 1 (mMDH1)	MITOCHONDRIAL MALATE DEHYDROGENASE 1 (mMDH1)	S	23	-3.84928	-3.46178	-2.77376	-2.89069	-2.44801	-4.11864	-3.0911	-3.92348	-3.59009	-3.63574	-4.24072	-2.28476	-3.57368	-1.81413	-3.09247	-3.38735	-3.44379	2	___1							0.973811	0.0155134	57.348	48.134	57.348	0.35451	11742000	23	0.753783	0.15143	0.328379	0.243971	-0.837784	-1.32021	0.845257	0.0639955	0.205539	AT1G53240.1	23
AT1G53300	Encodes one of the 36 carboxylate clamp (CC)-tetratricopeptide repeat (TPR) proteins (Prasad 2010, Pubmed ID: 20856808) with potential to interact with Hsp90/Hsp70 as co-chaperones. The TTL family is required for osmotic stress tolerance and male sporogenesis. The mRNA is cell-to-cell mobile.	TETRATRICOPEPTIDE-REPEAT THIOREDOXIN-LIKE 1 (TTL1)	TETRATRICOPEPTIDE-REPEAT THIOREDOXIN-LIKE 1 (TTL1)	S	39	-1.88975	-3.02079	-2.74788	-3.44574	-3.10735	-2.56049	-2.50922	-2.82755	-1.40352	-1.97908	-2.35134	-1.4115	-1.37014	-1.88787	-1.92321	-1.78549	-2.07437	2	___1			+	Col-0_D_ost1_D			0.999322	3.97061e-12	146.5	113.28	146.5	1.0645	64760000	39	0.946564	-0.0248871	-0.0698743	0.0025519	-1.19465	-5.57809	0.0844101	-0.848349	-2.14845	AT1G53300.1	39
AT1G53300	Encodes one of the 36 carboxylate clamp (CC)-tetratricopeptide repeat (TPR) proteins (Prasad 2010, Pubmed ID: 20856808) with potential to interact with Hsp90/Hsp70 as co-chaperones. The TTL family is required for osmotic stress tolerance and male sporogenesis. The mRNA is cell-to-cell mobile.	TETRATRICOPEPTIDE-REPEAT THIOREDOXIN-LIKE 1 (TTL1)	TETRATRICOPEPTIDE-REPEAT THIOREDOXIN-LIKE 1 (TTL1)	S	42	-0.952002	-2.7024	-2.89156	-2.69111	-2.72063	-2.64192	-3.85224	-1.51684	-1.28951	-1.11502	-0.964237	-3.19991	-1.03106	-2.92812	-3.50491	-3.5561	-3.7325	2	___1							0.999889	1.42947e-09	143.98	101.69	136.3	-0.16765	64151000	42	0.591306	0.373639	0.566958	0.726926	-0.296542	-0.369445	0.0630744	1.28857	2.38116	AT1G53300.1	42
AT1G53300	Encodes one of the 36 carboxylate clamp (CC)-tetratricopeptide repeat (TPR) proteins (Prasad 2010, Pubmed ID: 20856808) with potential to interact with Hsp90/Hsp70 as co-chaperones. The TTL family is required for osmotic stress tolerance and male sporogenesis. The mRNA is cell-to-cell mobile.	TETRATRICOPEPTIDE-REPEAT THIOREDOXIN-LIKE 1 (TTL1)	TETRATRICOPEPTIDE-REPEAT THIOREDOXIN-LIKE 1 (TTL1)	S	196	-1.28408	-2.06422	-2.27703	-2.07727	-2.33368	-1.85689	-2.59418	-3.3683	-1.76508	-1.7109	-2.55503	-3.79302	-3.49725	-2.87057	-1.9753	-1.60793	-2.6792	3	___1							0.951587	0.00239551	53.1	40.797	53.1	1.1092	65391000	196	0.162349	0.612612	1.59264	NaN	0	NaN	0.679646	0.161829	0.438023	AT1G53300.1	196
AT1G53310	Encodes one of four Arabidopsis phosphoenolpyruvate carboxylase proteins.Plays an important role in carbon and nitrogen metabolism.	PHOSPHOENOLPYRUVATE CARBOXYLASE 1 (PPC1)	PHOSPHOENOLPYRUVATE CARBOXYLASE 1 (ATPPC1);PEP(PHOSPHOENOLPYRUVATE) CARBOXYLASE 1 (PEPC1); (ATPEPC1);PHOSPHOENOLPYRUVATE CARBOXYLASE 1 (PPC1)	S	11	0.572107	0.399025	0.916662	1.14527	2.5842	1.77261	2.88558	-1.32407	-1.67416	-2.26211	-3.79791	2.97352	0.562059	0.673979	1.49076	1.57394	0.942852	2	___1							1	0.00038847	121.6	109.39	68.893	0.28213	2902400000	11	0.488695	-0.721316	-0.737411	0.955962	0.0763957	0.0580435	0.0759221	-0.577585	-2.23254	AT1G53310.3;AT1G53310.2;AT1G53310.1	11;11;11
AT1G53310	Encodes one of four Arabidopsis phosphoenolpyruvate carboxylase proteins.Plays an important role in carbon and nitrogen metabolism.	PHOSPHOENOLPYRUVATE CARBOXYLASE 1 (PPC1)	PHOSPHOENOLPYRUVATE CARBOXYLASE 1 (ATPPC1);PEP(PHOSPHOENOLPYRUVATE) CARBOXYLASE 1 (PEPC1); (ATPEPC1);PHOSPHOENOLPYRUVATE CARBOXYLASE 1 (PPC1)	S	759	-5.74005	-1.45363	-2.56586	-3.04419	-1.58141	-1.61536	-3.27749	-4.53434	-2.68103	-2.28085	-2.76173	-0.0570583	-1.66107	-1.14047	-2.56132	-2.43616	-3.21198	2	___1							0.999756	0.0217175	74.76	54.431	74.76	-0.33854	100250000	759	0.711314	-0.448784	-0.388135	0.111577	-1.79928	-1.92939	0.689053	-0.464446	-0.4242	AT1G53310.3;AT1G53310.2;AT1G53310.1;AT2G42600.3;AT2G42600.2;AT2G42600.1	762;762;762;759;759;759
AT1G53430	Probable LRR receptor-like ser/thr-protein kinase; Commonly-enriched candidate LPS-interacting PM-associated proteins for both LPS chemotypes subsequent to the polymyxin B affinity chromatography strategy.	NEMATODE-INDUCED LRR-RLK 2 (NILR2)	NEMATODE-INDUCED LRR-RLK 2 (NILR2)	S	934	-2.33431	-3.23793	-2.14632	-3.08482	0.25878	0.545618	-1.1631	-1.8164	-3.47766	-3.17182	-3.17041	-2.87074	0.192627	-3.68258	-2.98729	-3.19949	-3.17151	2	___1	+	Col-0_W_Col-0_D					0.997148	7.50208e-31	199.76	160.76	199.76	0.6861	162160000	934	0.0137601	-2.15707	-3.44242	0.243398	1.57646	1.32206	0.253911	0.418585	1.28868	AT1G53430.2;AT1G53430.1	934;975
AT1G53430	Probable LRR receptor-like ser/thr-protein kinase; Commonly-enriched candidate LPS-interacting PM-associated proteins for both LPS chemotypes subsequent to the polymyxin B affinity chromatography strategy.	NEMATODE-INDUCED LRR-RLK 2 (NILR2)	NEMATODE-INDUCED LRR-RLK 2 (NILR2)	S	787	-0.410271	-0.676825	-0.445669	-1.86687	0.0216961	-0.189304	-1.04038	-1.23629	-0.718608	-0.337292	-2.31266	-2.62681	-3.54473	-3.48275	-1.10144	-1.2949	-1.79663	2	___1			+	Col-0_D_ost1_D			0.982346	3.8281e-12	147.12	108.49	68.034	1.0141	248430000	787	0.624534	-0.23884	-0.515661	0.00200676	2.60703	5.88897	0.270726	0.547747	1.23784	AT1G53430.2;AT1G53430.1	787;828
AT1G53440	Leucine-rich repeat transmembrane protein kinase;(source:Araport11)	0	0	S	831	0.920782	0.311335	0.658058	0.462267	0.28747	-2.79859	-0.0333443	0.544468	0.704007	0.360134	-0.317261	-1.10625	-0.764645	-0.131834	0.435507	0.832403	0.308065	2	___1							0.983286	3.89478e-16	192.65	154.97	188.25	0.21373	535440000	831	0.215718	1.08811	1.38373	0.86661	0.167577	0.176792	0.770931	0.0627853	0.3074	AT1G53440.1;AT3G14840.2	826;831
AT1G53570	Encodes a member of the MEKK subfamily that functions redundantly with MAPKKK5 to activate MPK3/6 downstream of multiple pattern recognition receptors and confer resistance to both bacterial and fungal pathogens.	MITOGEN-ACTIVATED PROTEIN KINASE KINASE KINASE 3 (MAP3KA)	MITOGEN-ACTIVATED PROTEIN KINASE KINASE KINASE 3 (MAP3KA);MAP KINASE KINASE KINASE 3 (MAPKKK3)	S	512	-3.08258	-2.82469	-1.81802	-2.67348	-3.06472	-2.68143	-2.73096	-1.85399	-3.0034	-2.68566	-1.6849	-1.50087	-2.3992	-1.82768	-1.8997	-2.91344	-1.20108	2	___1							0.987333	5.00301e-05	97.551	79.456	97.551	-0.7078	148330000	512	0.965565	-0.0169154	-0.0450034	0.132834	-0.673526	-1.79368	0.310374	-0.59495	-1.12838	AT1G53570.5;AT1G53570.4;AT1G53570.3;AT1G53570.2;AT1G53570.1	512;537;537;537;538
AT1G53570	Encodes a member of the MEKK subfamily that functions redundantly with MAPKKK5 to activate MPK3/6 downstream of multiple pattern recognition receptors and confer resistance to both bacterial and fungal pathogens.	MITOGEN-ACTIVATED PROTEIN KINASE KINASE KINASE 3 (MAP3KA)	MITOGEN-ACTIVATED PROTEIN KINASE KINASE KINASE 3 (MAP3KA);MAP KINASE KINASE KINASE 3 (MAPKKK3)	S	134	-0.043972	0.185104	0.113539	-0.117088	-0.651947	-0.476915	0.780411	0.286989	-2.75771	-3.96889	-0.354618	0.277563	-4.8268	0.540771	-1.1152	-0.494282	-0.67733	3	___1					+	Col-0_W_5A-1_W	1	3.42429e-06	121.92	102.82	70.897	0.24644	1147600000	134	0.88898	0.0497613	0.145634	0.422984	1.32079	0.872227	0.00605861	0.796667	4.55969	AT1G53570.5;AT1G53570.4;AT1G53570.3;AT1G53570.2;AT1G53570.1;AT1G53570.6;AT1G53570.7	134;134;134;134;134;134;134
AT1G53580	Mononuclear Fe(II)-containing member of the b-lactamase fold superfamily. ETHE1 is homodimeric in solution, exhibits low-level esterase activity, and specifically binds a single Fe(II) atom in the active site.	GLYOXALASE II 3 (GLY3)	GLYOXALASE 2-3 (GLX2-3);ETHE1-LIKE (ETHE1);GLYOXALASE II 3 (GLY3);ETHYLMALONIC ENCEPHALOPATHY PROTEIN1 (ETHE1)	S	269	-3.10032	-2.71684	-2.78522	-3.35045	-0.793331	-0.883652	-2.47542	-2.49251	-2.99253	-3.04999	-3.43256	-2.28698	-1.75196	-2.16441	-2.73524	-3.05702	-3.17114	2	___1	+	Col-0_W_Col-0_D					0.999992	2.83921e-06	117.48	103.24	117.48	-0.2054	64489000	269	0.0371686	-1.32698	-2.66713	0.513588	0.406555	0.702724	NaN	0	NaN	AT1G53580.1;AT1G53580.2	269;269
AT1G53590	Calcium-dependent lipid-binding (CaLB domain) family protein;(source:Araport11)	(NTMC2T6.1)	(NTMC2TYPE6.1); (NTMC2T6.1)	S	572	-1.67504	-3.16475	-3.23424	-2.82471	1.07418	1.04696	0.747091	-0.411201	-0.714456	-1.47266	0.424116	0.808104	0.975117	-0.249609	-2.77322	-3.37877	-3.47948	2	___1	+	Col-0_W_Col-0_D					0.999514	4.08674e-58	252.77	222.71	223.36	0.58464	398760000	572	0.000562477	-3.33894	-6.64143	0.851727	0.103055	0.196808	0.344419	0.485807	1.04374	AT1G53590.1	572
AT1G53590	Calcium-dependent lipid-binding (CaLB domain) family protein;(source:Araport11)	(NTMC2T6.1)	(NTMC2TYPE6.1); (NTMC2T6.1)	S	432	-2.87695	-2.8048	-3.68762	-3.43492	-0.756872	-1.08955	-0.663536	-1.31713	-1.02619	-3.20465	-3.86152	-1.52869	-0.573925	-1.46782	-1.94996	-3.69056	-2.74431	2	___1	+	Col-0_W_Col-0_D					0.968524	4.91116e-11	139	122.65	139	0.33246	103810000	432	0.000140495	-2.2443	-8.5494	0.49071	0.233374	0.743334	NaN	0	NaN	AT1G53590.1	432
AT1G53590	Calcium-dependent lipid-binding (CaLB domain) family protein;(source:Araport11)	(NTMC2T6.1)	(NTMC2TYPE6.1); (NTMC2T6.1)	S	548	1.79512	1.6886	1.35613	1.09358	0.617062	0.363075	2.03292	2.62363	2.25164	1.63481	2.00376	2.66123	2.4087	2.30634	1.90301	1.91389	1.75328	3	___1							0.999999	1.39547e-65	270.32	252.13	231.25	0.52682	2517600000	548	0.90063	0.0741858	0.130245	0.168776	-1.04958	-1.60787	0.112677	-0.373368	-1.92174	AT1G53590.1	548
AT1G53590	Calcium-dependent lipid-binding (CaLB domain) family protein;(source:Araport11)	(NTMC2T6.1)	(NTMC2TYPE6.1); (NTMC2T6.1)	S	483	-2.27323	-3.8528	-1.86228	-2.866	-3.01227	-2.88929	-1.68868	-2.22255	-2.87814	-1.51784	-2.67784	-1.24147	-2.36648	-1.68033	-2.90503	-4.6378	-3.07784	2	___1							1	0.00239063	117.52	71.353	91.584	0.45164	49654000	483	0.641129	-0.26038	-0.490607	0.190538	-0.690434	-1.51363	0.283581	0.826646	1.20087	AT1G53590.1	483
AT1G53590	Calcium-dependent lipid-binding (CaLB domain) family protein;(source:Araport11)	(NTMC2T6.1)	(NTMC2TYPE6.1); (NTMC2T6.1)	S	579	-2.17868	-2.1871	-2.06581	-2.39098	-1.61094	-1.60118	-0.482424	-0.844002	-1.97474	-1.49809	-1.99583	-1.43857	-1.95564	-1.19756	-2.53477	-2.40982	-2.36713	2	___1	+	Col-0_W_Col-0_D					1	6.06237e-27	205.3	181.9	205.3	-1.9419	136060000	579	0.0101744	-1.07101	-3.69284	0.348097	0.395955	1.03502	0.0506475	0.231599	2.55998	AT1G53590.1	579
AT1G53720	Encodes a cyclophilin, member of a family modular proteins consisting of a peptidyl-prolyl cis? trans isomerase (PPIase) domain, followed by an RNA recognition motif (RRM), and a C-terminal domain enriched in charged amino acids. Interacts with with SCL33/SR33 and with a majority of Arabidopsis SR proteins and the largest subunit of RNA polymerase II. Localizes to the nucleus, but it does not sig…	CYCLOPHILIN 59 (CYP59)	CYCLOPHILIN 59 (ATCYP59);CYCLOPHILIN 59 (CYP59)	S	180	-2.87692	-0.541592	0.026886	0.697041	-0.00507355	-0.272398	0.780272	-3.09221	-3.42726	-3.37087	-3.22542	-3.65799	-4.0561	-0.165754	-0.688049	-0.295418	0.358152	3	___1							1	3.43593e-20	134.42	115.31	134.42	-0.99647	385120000	180	0.982467	-0.0262936	-0.0229074	0.227223	1.97926	1.37612	0.646414	-0.465207	-0.48767	AT1G53720.2;AT1G53720.1	180;180
AT1G53730	STRUBBELIG-receptor family 6;(source:Araport11)	STRUBBELIG-RECEPTOR FAMILY 6 (SRF6)	STRUBBELIG-RECEPTOR FAMILY 6 (SRF6)	S	364	1.69925	2.90543	2.24881	2.80909	-3.15608	-1.57519	1.68418	1.56027	2.76263	1.9565	2.46202	-3.50505	0.376936	1.94361	1.92695	2.57679	2.69393	3	___1							0.995589	6.81889e-21	176.1	153.86	147.9	-0.01376	2028100000	364	0.0636841	2.78735	2.26981	0.991037	0.0231296	0.0118062	0.96771	0.0164234	0.0425466	AT1G53730.1;AT1G53730.2	364;364
AT1G53730	STRUBBELIG-receptor family 6;(source:Araport11)	STRUBBELIG-RECEPTOR FAMILY 6 (SRF6)	STRUBBELIG-RECEPTOR FAMILY 6 (SRF6)	S	377	0.946356	0.99777	0.585592	0.648996	-1.71567	-2.58476	-3.46288	0.602583	0.839067	0.789328	0.676334	-1.46989	-2.85258	-0.110415	0.0545235	0.492975	0.630075	2	___1	+	Col-0_W_Col-0_D					1	1.82375e-08	138.19	109.64	138.19	0.83772	1010100000	377	0.026019	2.58486	2.93789	0.809189	-0.312553	-0.254577	0.0880852	0.402154	2.11479	AT1G53730.1;AT1G53730.2	377;377
AT1G53840	encodes a pectin methylesterase	PECTIN METHYLESTERASE 1 (PME1)	PECTIN METHYLESTERASE 1 (PME1);PECTIN METHYLESTERASE 1 (ATPME1)	S	6	-0.979328	-0.839638	-0.501778	-1.12394	-2.46254	-3.29456	-2.92094	-3.5379	-3.0576	-2.51067	-3.6407	-3.25888	-2.39084	-2.41213	-2.55219	-0.358261	-3.15282	2	___1	+	Col-0_W_Col-0_D					1	7.9748e-05	146.11	124.64	146.11	-0.49131	146770000	6	0.000185571	2.19281	8.13366	0.362697	-0.366702	-1.00119	0.171888	1.15992	1.59368	AT1G53840.1	6
AT1G54270	member of eIF4A - eukaryotic initiation factor 4A	EIF4A-2 (EIF4A-2)	EIF4A-2 (EIF4A-2)	S	4	-1.77725	-2.26998	-3.28358	-3.02697	0.335367	-2.95636	-1.46604	-2.62661	-0.92051	-2.42697	-3.8835	-0.240381	-0.6222	-0.770258	-1.3382	-2.03277	-1.12663	2	___1							0.999889	0.00264723	69.352	63.87	58.487	-0.78391	181460000	4	0.309056	-0.911035	-1.1111	0.258344	-1.13413	-1.27499	0.0676122	-1.09024	-2.32522	AT1G54270.1;AT1G54270.2	4;4
AT1G54270	member of eIF4A - eukaryotic initiation factor 4A	EIF4A-2 (EIF4A-2)	EIF4A-2 (EIF4A-2)	S	146	-3.48247	-1.35476	-2.44196	-2.99375	-1.4101	-1.12099	-3.16084	2.6265	-2.75431	2.30563	-2.94638	-3.28458	-3.46685	-1.93456	-2.12475	-1.806	1.74004	2	___1							1	2.89036e-09	137.68	112.21	75.462	-1.4967	467020000	146	0.215148	-1.80188	-1.3857	0.214024	2.12897	1.42298	0.176632	-1.838	-1.57254	AT1G54270.1;AT1G54270.2;AT3G13920.1;AT3G13920.4;AT3G13920.3;AT3G13920.2;AT3G13920.5	146;141;146;141;136;146;150
AT1G54610	Protein kinase superfamily protein;(source:Araport11)	0	0	S	543	0.0955048	-1.93666	-3.27015	-3.07592	-0.580427	-3.3768	-1.10007	-0.0820007	0.175845	-3.08007	0.539318	-2.96774	-3.33274	-3.15594	-2.28511	-3.55916	0.405859	3	___1							0.993723	8.90284e-18	150.48	138.35	150.48	1.0947	160830000	543	0.49968	-0.761981	-0.718116	0.0834387	1.86731	2.15761	0.868059	-0.234004	-0.174848	AT1G54610.3;AT1G54610.2;AT1G54610.1	543;543;543
AT1G54610	Protein kinase superfamily protein;(source:Araport11)	0	0	S	527	-0.526388	-2.18539	-3.5185	-2.97818	-2.76827	-2.55071	-3.74961	-3.83487	-0.537993	-2.33378	-0.0746059	-2.84786	-3.39941	-1.32063	-1.28171	-0.866568	-0.572271	2	___1							0.936101	1.04359e-09	139.34	119.74	139.34	-0.3427	90113000	527	0.253274	0.923751	1.26353	0.329196	-0.703232	-1.08066	0.137865	-1.39527	-1.76482	AT1G54610.3;AT1G54610.2;AT1G54610.1	527;527;527
AT1G54920	hypothetical protein;(source:Araport11)	0	0	S	325	-0.851124	-1.04693	-0.786869	-0.366394	-2.90317	-0.471264	-2.51635	-0.381041	-0.269126	-0.814978	-4.16677	-1.09547	-0.121185	-1.29845	-0.184587	-0.527634	-0.0433846	2	___1							0.995881	4.46433e-09	140.1	86.137	123.38	-1.1578	240680000	325	0.280839	0.805127	1.18495	0.426157	-0.729589	-0.865852	0.0573442	-0.51096	-2.45836	AT1G54920.4;AT1G54920.1;AT1G54920.2;AT1G54920.3	325;325;325;326
AT1G55040	SED1 is a protein of unknown function that is located in the mitochondrion. sed1 mutants are embryo lethal.	SLOW EMBRYO DEVELOPMENT1 (SED1)	SLOW EMBRYO DEVELOPMENT1 (SED1);ORGANELLE ZINC FINGER 2 (OZ2)	S	566	-1.07373	-2.22145	-3.08496	-3.88014	-3.40548	-3.65864	-0.487186	-0.0325279	-1.99181	-0.699545	-0.373594	-0.629192	-0.692087	0.20451	-1.50957	-1.20561	-0.641979	2	___1							0.999995	5.06136e-14	151.48	127.74	151.48	-1.8184	185590000	566	0.573695	-0.66911	-0.594821	0.242648	-1.5237	-1.32449	0.109135	-1.44601	-1.94667	AT1G55040.1	566
AT1G55150	DEA(D/H)-box RNA helicase family protein;(source:Araport11)	0	0	S	47	1.16746	0.934212	0.567091	-2.70616	-1.89514	-2.92997	-1.31215	-0.0198269	1.49433	0.994061	0.804766	2.36593	2.09974	2.52442	1.03573	1.98214	-0.79063	3	___1			+	Col-0_D_ost1_D			1	2.1406e-30	191.44	176.79	172.74	0.21393	866590000	47	0.210633	1.52992	1.40144	0.00310852	-3.8693	-5.33239	0.58002	-0.751763	-0.591328	AT1G55150.1;AT1G55150.2	47;72
AT1G55250	Encodes one of two orthologous E3 ubiquitin ligases in Arabidopsis that are involved in monoubiquitination of histone H2B.	HISTONE MONO-UBIQUITINATION 2 (HUB2)	HISTONE MONO-UBIQUITINATION 2 (HUB2)	S	542	-2.78544	-3.60186	-2.57204	-4.18431	-2.57592	-3.03557	-2.22994	-2.31385	-2.83745	-2.82527	-2.4929	-1.96876	-3.24047	-3.12088	-3.00182	-3.60959	-1.92911	2	___1							0.887575	0.000949889	78.486	57.235	69.602	-0.38265	24021000	542	0.121508	-0.747094	-1.80263	0.579133	0.237884	0.592759	0.499075	-0.439073	-0.728335	AT1G55250.5;AT1G55250.3;AT1G55250.1;AT1G55250.2;AT1G55250.4	542;546;561;44;44
AT1G55490	encodes the beta subunit of the chloroplast chaperonin 60, a homologue of bacterial GroEL. Mutants in this gene develops lesions on its leaves, expresses systemic acquired resistance (SAR) and develops accelerated cell death to heat shock stress. The protein has molecular chaperone activity for suppressing protein aggregation in vitro.	CHAPERONIN 60 BETA (CPN60B)	CHAPERONIN 60 BETA (CPN60B); (CPNB1);CHAPERONIN-60BETA1 (CPN60BETA1);LESION INITIATION 1 (LEN1)	S	262	-3.18439	-2.88385	-2.63365	-3.09565	-0.745268	-0.946581	-1.52636	-1.29519	-1.83791	-2.70943	-4.15667	-2.58889	-0.578836	-2.42006	-3.57053	-2.9591	-3.8313	2	___1	+	Col-0_W_Col-0_D					0.995453	2.14222e-06	119.87	99.76	119.87	-0.74389	82338000	262	0.000142091	-1.82103	-8.53217	0.259052	0.734247	1.27282	NaN	0	NaN	AT1G55490.5;AT1G55490.4;AT1G55490.3;AT1G55490.2;AT1G55490.1;AT3G13470.1;AT5G56500.2;AT5G56500.1	262;262;262;262;262;258;258;258
AT1G55490	encodes the beta subunit of the chloroplast chaperonin 60, a homologue of bacterial GroEL. Mutants in this gene develops lesions on its leaves, expresses systemic acquired resistance (SAR) and develops accelerated cell death to heat shock stress. The protein has molecular chaperone activity for suppressing protein aggregation in vitro.	CHAPERONIN 60 BETA (CPN60B)	CHAPERONIN 60 BETA (CPN60B); (CPNB1);CHAPERONIN-60BETA1 (CPN60BETA1);LESION INITIATION 1 (LEN1)	S	478	-3.07578	-3.89531	-2.98157	-3.2504	-3.00677	-3.09033	-3.83262	-2.20039	-2.34747	-2.06791	-4.29976	-0.623201	-1.44425	-1.10964	-3.24714	-2.68824	-3.44558	2	___1			+	Col-0_D_ost1_D			1	0.0251199	63.624	25.321	47.556	0.69498	37716000	478	0.519463	-0.268239	-0.684071	0.00663434	-1.9735	-4.461	0.597806	-0.173783	-0.5629	AT1G55490.5;AT1G55490.4;AT1G55490.3;AT1G55490.2;AT1G55490.1;AT3G13470.1;AT5G56500.2;AT5G56500.1	478;478;478;478;478;474;474;474
AT1G55860	encodes a ubiquitin-protein ligase containing a HECT domain. There are six other HECT-domain UPLs in Arabidopsis.	UBIQUITIN-PROTEIN LIGASE 1 (UPL1)	UBIQUITIN-PROTEIN LIGASE 1 (UPL1)	S	906	0.171274	-0.0800037	-0.142565	-0.326069	0.0217609	-2.82921	0.901211	0.470863	0.316556	0.360212	0.896814	1.64374	-2.45072	0.726519	0.15929	0.188915	0.326298	3	___1							0.942819	4.97338e-42	188.4	171.68	188.4	1.1887	493710000	906	0.765938	0.264503	0.311531	0.826707	-0.332022	-0.230677	0.0562523	-0.319175	-2.47402	AT1G55860.1	906
AT1G55860	encodes a ubiquitin-protein ligase containing a HECT domain. There are six other HECT-domain UPLs in Arabidopsis.	UBIQUITIN-PROTEIN LIGASE 1 (UPL1)	UBIQUITIN-PROTEIN LIGASE 1 (UPL1)	S	1509	-0.591724	-3.03551	-3.02016	-2.89599	0.65597	0.374781	-2.73672	-3.65258	-0.314063	-0.879784	0.195499	-2.91005	-3.28836	0.00079155	-2.55632	-0.525446	-0.0925026	3	___1							0.787797	8.89128e-07	73.805	60.063	73.805	1.431	223510000	1509	0.432064	-1.04621	-0.841996	0.659935	0.726239	0.467311	0.221798	-1.32776	-1.39506	AT1G55860.1	1509
AT1G55860	encodes a ubiquitin-protein ligase containing a HECT domain. There are six other HECT-domain UPLs in Arabidopsis.	UBIQUITIN-PROTEIN LIGASE 1 (UPL1)	UBIQUITIN-PROTEIN LIGASE 1 (UPL1)	S	2265	-2.06597	-2.3238	-2.85836	-2.56045	0.721346	1.20399	-0.594439	-1.61394	-2.72693	-2.22576	-2.54826	-2.37713	0.0499249	-3.59449	-3.18565	-2.27336	-3.83617	3	___1	+	Col-0_W_Col-0_D					0.952227	0.000164111	85.166	76.07	75.358	-0.082598	231700000	2265	0.0113641	-2.38139	-3.60018	0.165621	1.90314	1.62251	0.192018	0.646243	1.50761	AT1G55860.1;AT1G70320.1	2265;2285
AT1G55860	encodes a ubiquitin-protein ligase containing a HECT domain. There are six other HECT-domain UPLs in Arabidopsis.	UBIQUITIN-PROTEIN LIGASE 1 (UPL1)	UBIQUITIN-PROTEIN LIGASE 1 (UPL1)	S	1701	-3.01438	-2.13698	-2.30761	0.810543	-3.29192	-3.87499	-2.99923	-4.01239	0.505172	0.417397	0.537701	0.53573	-0.0645771	1.21022	-1.60596	-3.65948	1.00864	2	___1			+	Col-0_D_ost1_D			0.855738	1.17865e-15	159.77	143.97	74.519	0.17817	216230000	1701	0.0760044	1.88253	2.14139	0.000187945	-4.10509	-9.80412	0.878331	-0.243175	-0.161088	AT1G55860.1;AT1G70320.1	1701;1703
AT1G55860	encodes a ubiquitin-protein ligase containing a HECT domain. There are six other HECT-domain UPLs in Arabidopsis.	UBIQUITIN-PROTEIN LIGASE 1 (UPL1)	UBIQUITIN-PROTEIN LIGASE 1 (UPL1)	S	1703	0.476217	0.580036	0.463745	0.810543	0.952515	0.926449	0.859779	-4.26953	0.505172	-4.55131	0.537701	0.53573	-0.0645771	1.21022	0.328709	0.66745	1.00864	2	___1							0.999968	5.17504e-87	280.47	254.65	280.47	0.15101	1431400000	1703	0.485226	0.965331	0.743567	0.572743	-0.943154	-0.603115	0.670659	-0.0856309	-0.451321	AT1G55860.1;AT1G70320.1	1703;1705
AT1G56070	encodes a translation elongation factor 2-like protein that is involved in cold-induced translation. Mutations in this gene specifically blocks low temperature-induced transcription of cold-responsive genes but induces the expression of CBF genes and mutants carrying the recessive mutations fail to acclimate to cold and is freezing sensitive.	LOW EXPRESSION OF OSMOTICALLY RESPONSIVE GENES 1 (LOS1)	LOW EXPRESSION OF OSMOTICALLY RESPONSIVE GENES 1 (LOS1);LOW EXPRESSION OF OSMOTICALLY RESPONSIVE GENES 1 (AT1G56075.1)	S	486	-2.36805	-2.86282	-3.00457	-2.8297	-3.10407	-4.19238	-3.77432	-3.03002	-2.66271	-1.9552	-2.33707	-4.00049	-4.48979	-2.88423	-2.69803	-2.34138	-2.7298	2	___1							0.999567	0.0176117	61.65	24.459	61.65	0.075828	43656000	486	0.0502975	0.758914	2.44254	0.627937	0.266305	0.515871	0.403954	-0.176548	-0.911254	AT1G56070.3;AT1G56070.2;AT1G56070.1;AT3G12915.1	486;486;486;464
AT1G56190	One of a pair of plastid localized phosphoglycerate kinases involved in galactolipid biosynthesis. Functions redundantly with AT3g12780 (PGK1) in the chloroplast in the biosynthesis of thylakoid membrane galactolipids. Double mutants are photosynthetically incompetent, plants are albino and seedling lethal.	(CPGK2)	(CPGK2); (PGKP2); (PGK2)	S	263	-1.99362	-0.42951	-0.162853	0.174406	-2.67758	-2.07714	-2.83035	-1.50303	-2.87348	-2.17288	-2.88203	-4.20891	-3.00487	-3.40332	-3.39082	-2.58833	-3.6776	2	___1	+	Col-0_W_Col-0_D	+	Col-0_D_ost1_D	+	Col-0_W_5A-1_W	1	5.71536e-05	98.592	75.217	98.592	-3.2452	126010000	263	0.0259442	1.66913	2.9401	0.0417083	1.26701	2.72134	0.00887655	2.61602	4.15389	AT1G56190.2;AT1G56190.1;AT3G12780.1	187;260;263
AT1G56190	One of a pair of plastid localized phosphoglycerate kinases involved in galactolipid biosynthesis. Functions redundantly with AT3g12780 (PGK1) in the chloroplast in the biosynthesis of thylakoid membrane galactolipids. Double mutants are photosynthetically incompetent, plants are albino and seedling lethal.	(CPGK2)	(CPGK2); (PGKP2); (PGK2)	S	276	0.97053	-3.07128	-2.76715	-3.93713	-4.00967	-3.59597	-3.02477	0.445236	1.0562	0.758871	0.50178	-2.96188	-3.854	-2.54061	-3.43919	-3.17524	-3.85936	2	___1							1	1.50194e-05	111.94	78.046	99.5	0.33151	161750000	276	0.824346	0.345036	0.231868	0.665321	0.572536	0.459264	0.365133	1.29	0.99565	AT1G56190.2;AT1G56190.1;AT3G12780.1	200;273;276
AT1G56220	Dormancy/auxin associated family protein;(source:Araport11)	0	0	S	48	-2.23025	-2.53329	-2.82149	-2.64367	-3.04768	-2.63459	-2.71108	-1.07752	-2.75926	-3.59799	-3.43502	-0.635078	1.00037	-1.52525	-2.02954	-2.69212	-3.60056	2	___1							0.999519	4.68035e-06	110.92	94.59	110.92	-0.64724	88500000	48	0.692569	-0.189457	-0.415005	0.0578395	-1.98107	-2.45136	0.618004	0.2169	0.531227	AT1G56220.1;AT1G56220.5;AT1G56220.3;AT1G56220.2;AT1G56220.4	48;73;73;48;73
AT1G56230	enolase (DUF1399);(source:Araport11)	0	0	S	18	-1.75249	-2.50776	-2.67836	-3.09476	-4.5767	-0.822327	-2.61366	-0.968561	-1.5663	-1.60003	-1.31057	-2.30285	-0.533808	-0.688465	-2.73372	-3.82	-3.28185	2	___1							0.999973	3.09152e-12	157.33	124.9	123.28	-2.3839	328340000	18	0.784704	-0.263029	-0.285714	0.391046	-1.07027	-0.938561	0.128327	0.770183	1.8205	AT1G56230.3;AT1G56230.4;AT1G56230.2;AT1G56230.1	18;18;18;18
AT1G56290	CwfJ-like family protein;(source:Araport11)	0	0	S	96	0.132292	0.15921	0.490465	1.01715	-0.56744	-0.652714	0.1437	0.429903	0.531775	0.619951	1.77367	-2.43215	0.314911	0.683535	0.364506	0.734848	0.703569	3	___1							1	6.94536e-09	112.11	99.262	111.79	-0.5847	563370000	96	0.119004	0.611416	1.81767	0.734132	0.316263	0.359178	0.590348	-0.151196	-0.574757	AT1G56290.1	96
AT1G56340	Encodes one of three Arabidopsis calreticulins. In CRT-deficient mouse fibroblasts, this protein restores ER Ca2+ levels. Post-transcriptionally regulates together with CRT2 VAMP721/722 levels under ER stress. Loss-of-function results in activation of the ethylene signaling pathway, reduced susceptibility to Verticillium longisporum.	CALRETICULIN 1A (CRT1a)	CALRETICULIN 1 (CRT1);CALRETICULIN 1A (CRT1a); (AtCRT1a)	S	381	0.78232	0.100145	0.698576	0.419958	2.12482	2.33166	0.352701	0.818043	-3.34914	-0.187828	0.00037384	-3.27925	-3.33826	0.525156	0.469248	0.437067	0.530554	3	___1			+	Col-0_D_ost1_D			1	1.16476e-23	162.58	156.36	162.58	-0.31384	1333800000	381	0.125449	-0.906558	-1.77958	0.036591	3.43759	2.83194	0.912335	0.0212936	0.115777	AT1G56340.1	381
AT1G56450	20S proteasome beta subunit PBG1 (PBG1) mRNA, complete cds	20S PROTEASOME BETA SUBUNIT G1 (PBG1)	20S PROTEASOME BETA SUBUNIT G1 (PBG1); (MUD1)	S	245	-1.57104	-3.01436	-1.35638	-3.12987	-3.79206	-1.26539	-0.895096	-0.963614	-1.33816	-1.75595	-0.752722	-1.62779	-2.85061	-1.47695	-2.85306	-1.59775	-1.05466	2	___1							1	3.11666e-16	163.18	150.69	161.19	-2.4838	118570000	245	0.542629	-0.538869	-0.645261	0.786587	0.256074	0.28567	0.568709	-0.432752	-0.609689	AT1G56450.1	245
AT1G56460	HIT zinc finger and PAPA-1-like domain-containing protein;(source:Araport11)	(IES2C)	(IES2C)	S	303	-0.114714	-1.70113	-2.07819	-3.95349	-4.78565	-4.63953	-4.00563	-3.92972	-0.237813	-0.729277	0.248987	1.03958	0.140736	0.465725	-2.64751	-0.201996	0.0897789	3	___1	+	Col-0_W_Col-0_D	+	Col-0_D_ost1_D			1	5.55338e-17	141.65	131.94	129.48	-0.13146	186720000	303	0.0270657	2.37825	2.90758	2.87529e-05	-4.88881	-14.4381	0.41846	-1.04197	-0.881377	AT1G56460.1;AT1G56460.2;AT1G56460.3	303;333;303
AT1G56540	Disease resistance protein (TIR-NBS-LRR class) family;(source:Araport11)	0	0	S	854	0.533875	-0.888536	-3.73998	3.59425	1.41524	0.644148	2.69061	-3.20284	0.602223	-1.006	-2.45538	-4.48864	-0.186481	-2.16435	4.04886	-3.29953	2.65238	2	___1							1	0.0253224	73.26	25.411	67.169	-2.0812	1346200000	854	0.805022	-0.51189	-0.258009	0.204101	2.66661	1.46006	0.649878	-1.259	-0.482431	AT1G56540.2;AT1G56540.1	854;1018
AT1G57870	SK3-like kinase, subgroup IV	SHAGGY-LIKE KINASE 42 (SK42)	SHAGGY-LIKE KINASE 42 (SK42); (ASK&#948;)	S	49	-2.9702	-3.44113	-2.76352	-3.32191	-3.18647	-0.36087	-2.55133	-0.584646	-1.59583	-1.05952	-0.608517	-3.45143	-0.820007	-2.77822	-3.01234	-3.77855	-3.16565	3	___1							0.960522	7.27521e-05	62.284	56.565	62.284	0.7769	72213000	49	0.0909055	-1.45336	-2.01197	0.551457	0.679054	0.638144	NaN	0	NaN	AT1G57870.4;AT1G57870.2;AT1G57870.1;AT1G57870.3	49;49;49;49
AT1G57990	Member of a family of proteins related to PUP1, a purine transporter. May be involved in the transport of purine and purine derivatives such as cytokinins, across the plasma membrane.	PURINE PERMEASE 18 (PUP18)	PURINE PERMEASE 18 (ATPUP18);PURINE PERMEASE 18 (PUP18)	S	25	3.74708	3.39095	2.71499	2.61027	1.77626	2.23395	1.94824	2.86653	2.83374	2.60133	2.79247	0.979332	1.35907	2.10072	2.53565	2.78323	2.53628	2	___1	+	Col-0_W_Col-0_D					1	1.57585e-172	391.06	376.37	391.06	-0.71089	8303600000	25	0.0460401	0.90958	2.5078	0.125413	0.726536	1.83835	0.191628	0.497434	1.50919	AT1G57990.1	25
AT1G58025	A specific subunit of MINU1/2-associated SWI/SNF (MAS) complexes (PMID:36189880 and PMID:36471048).	BROMODOMAIN-CONTAINING PROTEIN 5 (BRD5)	BROMODOMAIN-CONTAINING PROTEIN 5 (BRD5)	S	59	-0.319286	0.172392	0.234083	-0.248293	-0.513826	-0.974184	0.668549	0.50285	0.233092	-1.70803	0.294825	-0.114721	-3.4984	0.418814	0.0127125	0.233242	-0.454958	2	___1							0.999994	1.63085e-09	124.35	108.76	120.4	0.82152	831680000	59	0.929472	0.038877	0.0922895	0.422372	0.985616	0.87346	0.90682	0.0293918	0.123104	AT1G58025.6;AT1G58025.1;AT1G58025.5;AT1G58025.4;AT1G58025.3;AT1G58025.2	59;59;59;59;59;59
AT1G58025	A specific subunit of MINU1/2-associated SWI/SNF (MAS) complexes (PMID:36189880 and PMID:36471048).	BROMODOMAIN-CONTAINING PROTEIN 5 (BRD5)	BROMODOMAIN-CONTAINING PROTEIN 5 (BRD5)	S	415	0.9995	-2.55473	1.09387	0.649769	0.925707	0.941544	1.05762	1.51745	-3.15272	1.60743	0.947226	1.51632	1.68546	1.83511	0.821815	0.976988	1.13139	2	___1			+	Col-0_D_ost1_D			1	2.86179e-15	179.93	157.46	89.624	0.054436	893530000	415	0.274027	-1.06348	-1.20372	0.0258491	-0.568383	-3.13371	0.410283	-0.929627	-0.898117	AT1G58025.6;AT1G58025.1;AT1G58025.5;AT1G58025.4;AT1G58025.3;AT1G58025.2	415;415;416;416;416;416
AT1G58250	SABRE, putative gene of unknown function, homologous to maize apt1 gene. Required for normal cell expansion in the root cortex. The sabre mutation results in abnormal cell expansion. Encodes a rare message; very low level of expression was detected in roots and shoots.	SABRE (SAB)	SABRE (SAB);HYPERSENSITIVE TO PI STARVATION 4 (HPS4)	S	2473	1.06121	0.749611	0.640564	0.635069	-3.24142	-1.42609	0.877815	1.59987	1.06279	0.900303	1.53036	0.957983	-0.186226	1.37009	0.644997	1.09375	0.796982	3	___1							0.999936	3.35268e-29	176.87	164.52	176.87	-1.4995	706180000	2473	0.279695	1.31907	1.18808	0.397861	-1.26141	-0.924056	0.668113	-0.0736292	-0.455105	AT1G58250.1;AT1G58250.2	2473;2521
AT1G58250	SABRE, putative gene of unknown function, homologous to maize apt1 gene. Required for normal cell expansion in the root cortex. The sabre mutation results in abnormal cell expansion. Encodes a rare message; very low level of expression was detected in roots and shoots.	SABRE (SAB)	SABRE (SAB);HYPERSENSITIVE TO PI STARVATION 4 (HPS4)	S	1605	0.979364	0.527218	0.500919	0.867434	-0.352642	-0.166807	0.184055	1.03265	1.06098	0.822432	0.580271	1.1317	0.745974	0.609749	0.803236	0.868153	-0.0741405	2	___1							1	9.51035e-19	171.78	149.71	171.78	0.8161	668060000	1605	0.149855	0.544421	1.65087	0.150611	-0.654828	-1.69621	0.550789	0.186318	0.639256	AT1G58250.1;AT1G58250.2	1605;1605
AT1G58360	Encodes AAP1 (amino acid permease 1), a neutral amino acid transporter expressed in seeds. Functions in amino acid uptake into embryos. The transporter also functions in acquisition of glutamate and neutral amino acids by the root.	AMINO ACID PERMEASE 1 (AAP1)	AMINO ACID PERMEASE 1 (AAP1);NEUTRAL AMINO ACID TRANSPORTER 2 (NAT2); (ATAAP1)	S	3	0.468594	0.477592	0.358124	0.144514	3.78482	2.85238	2.50611	1.66369	0.90665	0.634422	1.24055	2.23308	3.01057	0.925858	0.267216	-0.0771084	0.214005	3	___1	+	Col-0_W_Col-0_D					0.999991	9.94669e-104	282.06	267.84	202.9	-0.85646	1932300000	3	0.00192102	-2.33955	-5.24934	0.415485	0.645247	0.887438	0.136006	0.227502	1.77536	AT1G58360.1	3
AT1G58360	Encodes AAP1 (amino acid permease 1), a neutral amino acid transporter expressed in seeds. Functions in amino acid uptake into embryos. The transporter also functions in acquisition of glutamate and neutral amino acids by the root.	AMINO ACID PERMEASE 1 (AAP1)	AMINO ACID PERMEASE 1 (AAP1);NEUTRAL AMINO ACID TRANSPORTER 2 (NAT2); (ATAAP1)	S	23	-3.79121	-3.33943	-3.49822	-4.33705	0.56809	1.21039	-1.49305	-3.74256	-3.08255	-2.57506	-2.09962	-2.94618	-3.63521	-3.40986	-3.49087	-3.22838	-4.05961	3	___1	+	Col-0_W_Col-0_D					0.988458	5.27453e-47	212.17	202.88	116.94	-2.4494	259910000	23	0.0451434	-2.8772	-2.52235	0.124041	2.46614	1.8469	NaN	0	NaN	AT1G58360.1	23
AT1G59600	ZCW7;(source:Araport11)	(ZCW7)	(ZCW7)	S	309	-2.72323	-2.46777	-2.72424	-2.53575	0.884829	0.868481	-1.91988	-3.03121	-3.16265	-2.88847	-2.76406	-2.05071	-0.0287724	-2.44578	-2.89419	-3.74893	-3.25218	2	___1					+	Col-0_W_5A-1_W	1	7.9912e-07	125.28	104.54	125.28	-0.50759	301030000	309	0.118553	-1.8133	-1.82041	0.617441	0.708976	0.532101	0.0269362	0.685683	3.09728	AT1G59600.1	309
AT1G59610	A high molecular weight GTPase whose GTP-binding domain shows a low homology to those of other plant dynamin-like proteins.Contains a pleckstrin homologous domain. DRP2B and DRP1A participate together in clathrin-coated vesicle formation during endocytosis. The mRNA is cell-to-cell mobile.	DYNAMIN-LIKE 3 (DL3)	DYNAMIN-LIKE 3 (ADL3);DYNAMIN-LIKE 3 (DL3);DYNAMIN RELATED PROTEIN 2B (DRP2B)	S	843	-1.42144	-1.58074	-3.39664	-2.8316	-3.83674	-0.626266	-4.03629	-3.95403	-3.13651	-1.86136	-3.29187	-2.28114	-1.62425	-2.77428	-2.31992	-2.34064	-2.69719	2	___1							0.873077	2.16661e-132	347.33	315.45	288.82	-0.77177	655620000	843	0.433117	0.805725	0.839964	0.424771	-0.886774	-0.868632	0.811951	0.144976	0.250797	AT1G59610.1	843
AT1G59610	A high molecular weight GTPase whose GTP-binding domain shows a low homology to those of other plant dynamin-like proteins.Contains a pleckstrin homologous domain. DRP2B and DRP1A participate together in clathrin-coated vesicle formation during endocytosis. The mRNA is cell-to-cell mobile.	DYNAMIN-LIKE 3 (DL3)	DYNAMIN-LIKE 3 (ADL3);DYNAMIN-LIKE 3 (DL3);DYNAMIN RELATED PROTEIN 2B (DRP2B)	S	844	-3.53663	1.212	0.932446	0.656118	-3.9259	-2.63729	0.117775	-0.275805	-3.72793	1.09093	-4.68274	0.494886	-3.37583	-0.290855	-3.91299	-4.08827	-3.81244	2	___1					+	Col-0_W_5A-1_W	0.814078	9.06514e-116	338.14	305.87	258.8	-0.72601	389560000	844	0.351208	1.49629	1.01061	0.696937	-0.62304	-0.412685	0.0370746	3.75388	2.82078	AT1G59610.1	844
AT1G59610	A high molecular weight GTPase whose GTP-binding domain shows a low homology to those of other plant dynamin-like proteins.Contains a pleckstrin homologous domain. DRP2B and DRP1A participate together in clathrin-coated vesicle formation during endocytosis. The mRNA is cell-to-cell mobile.	DYNAMIN-LIKE 3 (DL3)	DYNAMIN-LIKE 3 (ADL3);DYNAMIN-LIKE 3 (DL3);DYNAMIN RELATED PROTEIN 2B (DRP2B)	S	533	1.01856	1.0735	1.05232	0.20207	-0.033823	0.371428	0.193438	0.800119	1.72553	2.29123	-0.143511	1.71363	-0.613697	1.53557	-3.05317	0.505165	0.52898	2	___1							0.997709	9.71392e-07	121.82	107.15	121.03	-0.35739	739840000	533	0.117403	0.503821	1.82745	0.445743	-0.54571	-0.827295	0.201447	1.50962	1.47027	AT1G59610.1	533
AT1G59610	A high molecular weight GTPase whose GTP-binding domain shows a low homology to those of other plant dynamin-like proteins.Contains a pleckstrin homologous domain. DRP2B and DRP1A participate together in clathrin-coated vesicle formation during endocytosis. The mRNA is cell-to-cell mobile.	DYNAMIN-LIKE 3 (DL3)	DYNAMIN-LIKE 3 (ADL3);DYNAMIN-LIKE 3 (DL3);DYNAMIN RELATED PROTEIN 2B (DRP2B)	S	719	-0.664114	-0.86046	-0.445261	-1.1393	-0.0265808	0.549782	-1.83562	-3.53988	-0.389737	-0.232288	-1.98171	-2.48057	-3.35161	-2.96122	-0.443836	0.206129	0.133844	2	___1					+	Col-0_W_5A-1_W	0.999753	3.91669e-05	110.44	84.376	110.44	-0.89426	348940000	719	0.658898	0.435791	0.464159	0.184692	1.71806	1.53787	0.0290702	-0.742663	-3.03034	AT1G59610.1	719
AT1G59710	actin cross-linking protein (DUF569);(source:Araport11)	0	0	S	204	-0.326736	0.817743	-3.2781	0.437233	-2.60279	-0.0287342	0.419609	-0.0182877	-0.467261	0.476866	-0.0288696	0.374317	-2.22354	-0.61998	-0.00456047	-4.00204	-0.320393	2	___1							0.999999	4.78792e-13	149.3	102.11	131.24	0.88418	1018600000	204	0.980196	-0.0299158	-0.0258752	0.807374	0.265517	0.257062	0.601714	0.854865	0.556723	AT1G59710.1;AT1G59710.2	204;204
AT1G59820	Encodes a phospholipid translocase. Involved in secretory vesicle formation from trans-Golgi in peripheral columella cells at the root tip and pollen tube. Mutants have slow growth,m short primary roots and slow growing pollen tubes.The mRNA is cell-to-cell mobile.ALA3 genetically and physically interacts with ARF GEFs GNOM (At1g13980) and BIG3 (At1g01960) in regulating PIN trafficking and polari…	AMINOPHOSPHOLIPID ATPASE 3 (ALA3)	AMINOPHOSPHOLIPID ATPASE 3 (ALA3)	S	6	-3.02332	0.043499	-0.137669	-0.985998	-1.34449	-1.55957	-0.644375	-0.85564	-1.27141	-1.30431	-1.82699	-1.11853	-1.31795	-1.58582	-1.32147	-0.800056	-1.67499	2	___1							0.996074	2.34384e-23	196.11	161.1	128.76	-0.1216	275180000	6	0.921776	0.0751443	0.1024	0.423194	0.239751	0.871805	0.791226	0.239633	0.279263	AT1G59820.1	6
AT1G59870	ATP binding cassette transporter. Localized to the plasma membrane in uninfected cells. In infected leaves, the protein concentrated at infection sites. Contributes to nonhost resistance to inappropriate pathogens that enter by direct penetration in a salicylic acid?dependent manner. Required for mlo resistance. Has Cd transporter activity (Cd2+ extrusion pump) and contributes to heavy metal resi…	PENETRATION 3 (PEN3)	PLEIOTROPIC DRUG RESISTANCE 8 (PDR8);ARABIDOPSIS THALIANA ATP-BINDING CASSETTE G36 (ATABCG36);ATP-BINDING CASSETTE G36 (ABCG36);ARABIDOPSIS PLEIOTROPIC DRUG RESISTANCE 8 (ATPDR8);PENETRATION 3 (PEN3)	S	40	-3.22033	-2.13208	-3.05124	-1.9724	-3.06332	1.22236	0.249685	0.33094	2.24012	1.7726	1.67101	3.63675	-4.00519	-0.130005	-4.1393	-3.40968	-3.42293	2	___1							0.95419	1.36654e-14	173.44	148.32	164.2	-0.013172	544850000	40	0.0616962	-2.27893	-2.29292	0.947612	-0.148933	-0.0690686	NaN	0	NaN	AT1G59870.1	40
AT1G60140	Encodes an enzyme putatively involved in trehalose biosynthesis. The protein has a trehalose synthase (TPS)-like domain that may or may not be active as well as a trehalose phosphatase (TPP)-like domain.	TREHALOSE PHOSPHATE SYNTHASE (TPS10)	TREHALOSE PHOSPHATE SYNTHASE (ATTPS10);TREHALOSE PHOSPHATE SYNTHASE (TPS10);TREHALOSE PHOSPHATE SYNTHASE 10 (TPS10)	S	5	-0.443466	0.252401	-0.20635	0.596865	1.44267	1.91447	1.80932	-2.5913	0.262919	-2.73839	0.835926	1.21704	1.06493	1.03651	0.0522442	0.184454	0.483431	2	___1							1	2.10463e-87	279.97	256.3	279.97	0.27183	1327100000	5	0.611148	-0.593926	-0.536137	0.733165	-0.462371	-0.360554	0.54778	-0.190181	-0.644283	AT1G60140.3;AT1G60140.6;AT1G60140.5;AT1G60140.4;AT1G60140.2;AT1G60140.1	5;5;5;5;5;5
AT1G60160	Member of the KT/KUP/HAK family of proton-coupled potassium transporters which have potential effect on cellular expansion.	K TRANSPORTER12 (KT12)	K TRANSPORTER12 (KT12)	S	47	1.10645	-0.573849	-0.0962276	-0.592421	-0.534361	0.106157	-0.361628	1.14671	0.979257	1.68712	0.94334	-0.80385	0.219946	0.538353	-0.193752	-0.510525	-0.281321	2	___1							1	2.58707e-05	125.82	103.5	117.09	-1.1821	597460000	47	0.823121	-0.12823	-0.23352	0.859597	0.104402	0.186213	0.57142	0.289522	0.605268	AT1G60160.1	47
AT1G60160	Member of the KT/KUP/HAK family of proton-coupled potassium transporters which have potential effect on cellular expansion.	K TRANSPORTER12 (KT12)	K TRANSPORTER12 (KT12)	S	187	-2.47391	-2.65513	-1.91161	-3.64348	-2.1611	-3.3394	-1.53009	-0.522665	-2.6509	-3.02292	-2.54879	-3.5263	-2.86998	-4.06478	-2.86502	-2.56769	-2.38456	3	___1							1	0.000625629	73.386	53.548	43.164	1.0413	61135000	187	0.300751	-0.782716	-1.13222	0.0878698	1.59871	2.11672	0.888513	-0.0652764	-0.147484	AT1G60160.1	187
AT1G60200	RBM25 is an alternative splicing factor involved in mediation of abiotic stress response and ABA response. Its expression is modulated by a variety of stressors and it in turn appears to affect the ratio of splice variants of stress responsive genes such as HAB1.2/HAB1.1.	RNA-BINDING PROTEIN 25 (RBM25)	RNA-BINDING PROTEIN 25 (RBM25)	S	448	3.63416	2.77311	2.79541	3.134	2.02494	2.2924	3.28623	3.80158	3.38591	3.2003	3.67145	3.62963	3.4299	3.81621	3.46359	3.14968	3.71272	3	___1							0.996821	1.06585e-42	208.58	165.41	202.98	0.15895	4496100000	448	0.632907	0.232882	0.502975	0.183945	-0.773956	-1.54102	0.248686	-0.357826	-1.30511	AT1G60200.4;AT1G60200.3;AT1G60200.2;AT1G60200.1	448;448;448;597
AT1G60440	The gene AT1G60440 encodes pantothenate kinase 1. Its molecular function was shown to phosphorylate pantothenate to form 4?-phosphopantothenate.	PANTOTHENATE KINASE 1 (PANK1)	(ATCOAA);PANTOTHENATE KINASE 1 (PANK1);PANTOTHENATE KINASE 1 (ATPANK1)	S	119	-2.20426	-2.82789	-2.76641	-2.54496	-3.91849	-2.66008	-2.00037	-1.53443	-1.81389	-2.43808	-1.94768	-4.37386	-2.81218	-2.62613	-1.67148	-2.53997	-2.01795	3	___1							1	1.00361e-06	111.92	100.82	111.92	-0.47058	59786000	119	0.918098	-0.0575396	-0.107235	0.378272	0.74238	0.966304	0.116916	-0.509415	-1.89295	AT1G60440.2;AT1G60440.3;AT1G60440.1	119;157;196
AT1G60890	Phosphatidylinositol 4-phosphate 5-kinase	(PIP5K8)	(PIP5K8)	S	241	-0.0816841	-2.41877	-3.27704	-3.51416	-2.23874	-1.66415	-0.256914	0.35866	0.0436621	-3.45406	-3.66777	-2.30533	-2.96029	0.352945	-0.296295	-0.289518	-0.527805	2	___1							0.999991	5.52256e-17	196.11	160.37	147.18	0.34637	200920000	241	0.21431	-1.37262	-1.3886	0.562222	0.687273	0.620322	0.089671	-1.95171	-2.10072	AT1G60890.1;AT1G60890.2	241;253
AT1G60950	encodes a major leaf ferredoxin	(FED A)	(FED A); (FD2);FERREDOXIN 2 (ATFD2)	S	14	-1.35911	-1.13632	-2.6985	-0.295792	-3.16885	-2.6626	-2.72314	-3.96463	-0.583833	0.217705	-0.159771	-2.37545	-3.81643	-3.22624	-3.9878	-0.961971	-3.4711	2	___1	+	Col-0_W_Col-0_D					0.956807	4.01588e-15	162.29	141.87	146.3	1.9709	101010000	14	0.0233097	1.75738	3.02291	NaN	0	NaN	0.202681	1.43453	1.4655	AT1G60950.1	14
AT1G61210	DWA3 encodes a DWD(DDB1 binding WD40) protein. Invitro analyses suggest its involvement in the negative regulation of ABA responses.One of four katanin p80 subunits. Involved in targeting of katanin complex to crossover and branch points to properly sever microtubules.	DWD HYPERSENSITIVE TO ABA 3 (DWA3)	KATANIN P80 SUBUNIT 2 (KTN80.2);DWD HYPERSENSITIVE TO ABA 3 (DWA3)	S	490	0.137941	-0.193178	-0.080843	-2.29834	-1.20146	-2.36715	-3.16011	-0.110563	-0.0643454	0.444691	-0.068655	-3.46325	-4.17112	-3.05446	-3.62359	-2.51321	-2.85519	2	___1					+	Col-0_W_5A-1_W	0.899101	5.97434e-07	120.92	91.966	117	0.5296	204490000	490	0.255591	1.10121	1.25664	0.0774414	1.85312	2.21678	0.0216435	2.38872	3.29293	AT1G61210.3;AT1G61210.2;AT1G61210.1	490;490;492
AT1G61350	ARM repeat superfamily protein;(source:Araport11)	0	0	S	432	-3.41696	0.77668	0.562851	-0.258995	-2.45453	-2.91434	-3.98936	-3.47201	-1.17765	-3.37009	-3.83862	0.406195	-3.69884	0.232244	0.53241	-0.300955	-0.650934	3	___1	+	Col-0_W_Col-0_D					1	0.0389606	43.497	14.379	43.497	1.7345	287210000	432	0.0430844	2.62346	2.55697	0.12513	-2.18743	-1.84011	0.723107	-0.44428	-0.374906	AT1G61350.1	432
AT1G61690	phosphoinositide binding protein;(source:Araport11)	(FYVE4)	(FYVE4)	S	251	0.901985	1.55199	1.38216	1.93028	1.02764	0.15303	0.613049	0.0510063	1.89118	-2.1773	1.39881	2.29979	1.47777	1.67772	1.83828	1.7076	1.38742	2	___1	+	Col-0_W_Col-0_D	+	Col-0_D_ost1_D			1	1.91258e-28	173.03	151.08	59.57	-0.78659	1234000000	251	0.0194875	0.980424	3.16313	0.0100722	-1.35724	-4.02486	0.495538	-0.202826	-0.734655	AT1G61690.1	251
AT1G61730	DNA-binding storekeeper protein-related transcriptional regulator;(source:Araport11)	0	0	S	49	0.24439	0.558683	0.012495	-0.872143	-1.40187	-3.69112	-1.25978	-1.43668	-0.0283842	0.421663	-1.34332	1.29692	-0.637959	0.777573	-0.442953	0.324711	-2.03798	2	___1	+	Col-0_W_Col-0_D	+	Col-0_D_ost1_D			0.999886	2.18745e-09	139.58	91.055	139.58	0.59004	376520000	49	0.0260915	1.93322	2.93575	0.0345349	-2.42621	-2.88132	0.351652	0.704599	1.02668	AT1G61730.1	49
AT1G62020	Member of the Coat Protein I (COPI) complex is a seven-subunit coatomer complex consisting of the &#945;, &#946;, &#946;&#8242;, &#947;, &#948;, &#949;, and &#950; proteins. COPI is required for retrograde transport from the Golgi to the endoplasmic reticulum, Golgi maintenance, and cell plate formation. Required for the acceptance of compatible pollen.	ALPHA1 COAT PROTEIN (alpha1-COP)	ALPHA1 COAT PROTEIN (alpha1-COP)	S	987	-3.10425	-2.37457	-2.22975	-1.9926	-1.95199	-1.76251	-2.54596	-3.63166	-2.64306	-3.50756	-3.00832	-2.43196	-2.75692	-2.38892	-3.07829	-2.83555	-3.46083	2	___1							0.899148	0.000122309	98.406	66.247	98.406	-0.4511	52457000	987	0.924662	0.047743	0.0986073	0.920987	0.0528999	0.104298	0.0817452	0.6996	2.17385	AT1G62020.1;AT2G21390.1	986;987
AT1G62020	Member of the Coat Protein I (COPI) complex is a seven-subunit coatomer complex consisting of the &#945;, &#946;, &#946;&#8242;, &#947;, &#948;, &#949;, and &#950; proteins. COPI is required for retrograde transport from the Golgi to the endoplasmic reticulum, Golgi maintenance, and cell plate formation. Required for the acceptance of compatible pollen.	ALPHA1 COAT PROTEIN (alpha1-COP)	ALPHA1 COAT PROTEIN (alpha1-COP)	S	186	-2.57291	-3.60775	-2.99491	-2.65256	1.40059	-0.114424	-1.02879	-3.19366	-3.83987	-3.64674	-3.56719	-3.52863	-2.21526	-3.59612	-3.03936	-2.66665	-3.67952	2	___1							1	9.66922e-30	198.96	171.62	198.96	-0.62954	249810000	186	0.0656912	-2.22296	-2.24723	0.103641	2.37926	1.98704	NaN	0	NaN	AT1G62020.1	186
AT1G62310	Encodes a probable H3K9me2 demethylase. Functions in trichome morphogenesis via regulation of GL3.	(JMJ29)	(JMJ29)	S	467	-2.64847	-2.86319	-3.34316	-3.04256	-3.45157	-1.01128	-0.715887	-1.90776	-2.99036	-3.53502	-3.87664	-0.993746	-0.0241966	-1.20152	-1.84057	-3.41568	-2.66116	2	___1							0.99998	1.47186e-08	127.71	89.409	127.71	1.0903	77715000	467	0.105712	-1.20272	-1.90311	0.247371	-1.03181	-1.30929	NaN	0	NaN	AT1G62310.1	467
AT1G62330	O-fucosyltransferase family protein;(source:Araport11)	0	0	S	30	-0.325222	-3.03279	-0.214375	-1.6748	-0.775209	-0.0164108	-0.96797	-1.07993	-1.89405	-1.53642	-2.09363	-3.38309	-3.09079	-1.87627	-4.84036	-2.29818	-2.53605	3	___1			+	Col-0_D_ost1_D			1	1.5336e-21	173.86	158.44	173.86	0.84314	624000000	30	0.425833	-0.601917	-0.854094	0.00750055	2.07351	4.32983	0.124326	1.91307	1.84512	AT1G62330.1	30
AT1G62390	Encodes one of the 36 carboxylate clamp (CC)-tetratricopeptide repeat (TPR) proteins (Prasad 2010, Pubmed ID: 20856808) with potential to interact with Hsp90/Hsp70 as co-chaperones.	PHOX2 (Phox2)	PHOX2 (Phox2);CLUMPED CHLOROPLASTS 1 (CLMP1)	S	274	-2.75309	-3.19769	-2.86193	-2.64582	0.556761	0.456369	-1.65302	-2.4844	-2.98053	-3.48177	-2.5285	-2.62023	-0.776138	-2.92931	-3.7934	-2.48031	-2.41298	2	___1	+	Col-0_W_Col-0_D					0.77817	3.63687e-19	173.44	102.36	173.44	-0.34736	136830000	274	0.0356465	-2.08356	-2.69851	0.267188	1.32749	1.2483	NaN	0	NaN	AT1G62390.1	274
AT1G62390	Encodes one of the 36 carboxylate clamp (CC)-tetratricopeptide repeat (TPR) proteins (Prasad 2010, Pubmed ID: 20856808) with potential to interact with Hsp90/Hsp70 as co-chaperones.	PHOX2 (Phox2)	PHOX2 (Phox2);CLUMPED CHLOROPLASTS 1 (CLMP1)	S	263	-1.78312	-0.905376	-1.31591	-2.52467	-1.3949	-3.79384	-4.51475	-3.44296	-1.83894	-1.01412	-3.58703	-0.628937	-1.23759	-1.39205	-2.35999	-2.6377	-4.50054	2	___1			+	Col-0_D_ost1_D			0.997174	3.74637e-07	132.5	113.52	132.5	-0.81045	203470000	263	0.0705819	1.65434	2.19505	0.0427992	-2.20042	-2.6997	0.0788582	1.53381	2.20237	AT1G62390.1	263
AT1G62630	Disease resistance protein (CC-NBS-LRR class) family;(source:Araport11)	0	0	S	704	1.20067	2.03212	1.65263	2.34787	-0.639065	-1.23078	1.65948	0.239994	2.71317	-3.82846	2.54694	1.51279	-3.5738	1.14985	2.19283	2.39512	2.17474	3	___1	+	Col-0_W_Col-0_D					0.999985	2.67193e-58	224.56	196.69	224.56	1.1998	1575900000	704	0.0371447	1.80091	2.66761	0.849707	0.311131	0.199533	0.195661	-0.44591	-1.49297	AT1G62630.1	704
AT1G62960	Encodes an aminotransferase with broad specificity for aspartate and aromatic amino aids such as tyrosine and phenylalanine. It does not act on branched chain amino acids and does not have ACC synthase activity.	ACC SYNTHASE 10 (ACS10)	ACC SYNTHASE 10 (ACS10)	S	102	-0.334801	-1.14643	-0.801601	-1.68023	-2.27003	-1.96783	-2.50971	-0.720869	-1.00118	-1.76671	-0.830219	-2.35226	-1.37436	-1.8956	-0.850803	-0.722847	-1.33414	2	___1							0.999839	1.02501e-19	168.32	126.68	168.32	-2.1911	698320000	102	0.123052	0.876345	1.79352	0.989965	0.0069623	0.0132178	0.955903	-0.0215062	-0.0581215	AT1G62960.1	102
AT1G63010	Encodes an SPX domain protein that transports Pi into the vacuole and is essential for phosphate homeostasis.	VACUOLAR PHOSPHATE TRANSPORTER 1 (VPT1)	VACUOLAR PHOSPHATE TRANSPORTER 1 (VPT1); (PHT5;1)	S	484	2.84842	2.40588	1.93542	-2.92832	2.55013	-1.309	1.81696	2.41841	2.67217	2.16937	2.46869	-3.35551	2.31678	2.37997	1.98862	2.20347	-3.39074	4	___1							0.999945	1.43678e-165	314.31	307.02	264.24	-0.10397	2076700000	484	0.857568	-0.303776	-0.187341	0.651146	0.922047	0.480518	0.73245	0.798232	0.361571	AT1G63010.2;AT1G63010.7;AT1G63010.6;AT1G63010.4;AT1G63010.3;AT1G63010.1;AT1G63010.5	484;486;486;486;486;486;495
AT1G63500	kinase with tetratricopeptide repeat domain-containing protein;(source:Araport11)	BRASSINOSTEROID-SIGNALING KINASE 7 (BSK7)	BRASSINOSTEROID-SIGNALING KINASE 7 (BSK7)	S	20	-1.02436	-3.32422	-1.34932	-1.22264	-1.45356	-2.84471	-1.06886	-0.166527	-0.926114	-1.17329	-1.20064	-1.0377	-2.76311	-0.11517	-1.09776	-0.929296	-1.63154	3	___1							0.979839	1.05361e-13	140.09	126.08	140.09	-0.54132	170700000	20	0.669326	-0.346721	-0.448805	0.935996	-0.0780875	-0.0844225	0.472814	-0.510602	-0.776046	AT1G63500.1	20
AT1G63500	kinase with tetratricopeptide repeat domain-containing protein;(source:Araport11)	BRASSINOSTEROID-SIGNALING KINASE 7 (BSK7)	BRASSINOSTEROID-SIGNALING KINASE 7 (BSK7)	S	209	-2.08774	2.32861	1.70457	-2.37966	-4.00933	2.43175	-3.34602	-3.99429	2.93688	2.76323	2.83669	-3.35589	-2.96791	-3.41478	-2.68425	-3.2537	-2.54841	2	___1							0.995609	1.1507e-31	222.45	73.875	220.46	0.22142	833600000	209	0.327691	2.12092	1.06537	0.606481	1.01672	0.549221	0.123948	2.72023	1.84749	AT1G63500.1;AT3G54030.1;AT4G00710.2;AT4G00710.1;AT5G41260.1;AT5G59010.1;AT5G59010.2;AT1G01740.4;AT1G01740.3;AT1G01740.5;AT1G01740.2;AT1G01740.1	213;210;212;212;213;209;79;132;132;210;210;210
AT1G63680	Encodes AtMurE, a homolog of the bacterial MurE that catalyze the ATP-dependent formation of UDP-N-acetylmuramic acid-tripeptide in bacterial peptidoglycan biosynthesis. Localized to plastids. AtMurE is involved in chloroplast biogenesis.	(MURE)	(ATMURE);PIGMENT DEFECTIVE EMBRYO 316 (PDE316); (MURE);ALBINO OR PALE-GREEN 13 (APG13)	S	194	0.469978	-0.0112648	0.317509	0.23321	1.08028	0.737959	1.17225	1.59577	0.81087	0.333757	2.11205	-3.29075	-3.8444	-0.337641	-0.0944786	-0.562933	1.28277	2	___1	+	Col-0_W_Col-0_D	+	Col-0_D_ost1_D			1	3.1723e-99	296.73	273.85	268.23	-1.0572	996890000	194	0.00456047	-0.894208	-4.4016	0.0114865	3.6375	3.89331	0.930452	0.0439057	0.0917596	AT1G63680.3;AT1G63680.2;AT1G63680.1	194;194;194
AT1G63700	Member of MEKK subfamily, a component of the stomatal development regulatory pathway. Mutations in this locus result in embryo lethality.	YODA (YDA)	EMBRYO DEFECTIVE 71 (EMB71);YODA (YDA);MAP KINASE KINASE KINASE 4 (MAPKKK4)	S	692	-3.26361	-2.96975	-2.54688	-2.56347	-1.29137	-3.69015	-3.54609	-1.82629	-2.86886	-4.12945	-0.22234	-1.20451	0.0544739	-2.28748	-1.68321	-2.96556	-3.39334	2	___1							0.999973	1.93691e-05	105.14	89.982	105.14	-0.84238	70598000	692	0.70776	-0.247455	-0.393203	0.17484	-1.44264	-1.58046	0.757582	-0.155226	-0.326062	AT1G63700.2;AT1G63700.1	692;692
AT1G63850	BTB/POZ domain-containing protein;(source:Araport11)	0	0	S	130	1.64782	-3.14409	-3.32038	-3.29327	-2.67089	-4.07917	-3.48308	1.96721	1.89018	1.59981	2.03731	-2.42326	-2.34616	1.93515	-4.14639	-4.13554	-2.76332	3	___1							1	1.03511e-32	190.48	162.84	190.48	0.39344	395280000	130	0.983795	0.0390028	0.0211725	0.603428	-1.12172	-0.554022	0.320414	1.65427	1.10262	AT1G63850.1	130
AT1G64110	Target promoter of the male germline-specific transcription factor DUO1.	DUO1-ACTIVATED ATPASE 1 (DAA1)	DUO1-ACTIVATED ATPASE 1 (DAA1)	S	343	-2.63374	-2.53014	-2.61686	-2.65623	3.50918	2.77974	1.27831	-3.15533	-2.56769	-3.84132	-3.27907	1.95724	3.13902	0.322824	-2.73399	-3.04945	-2.97399	3	___1	+	Col-0_W_Col-0_D					0.999877	5.04393e-64	219.07	198.16	217.86	0.67917	1787000000	343	0.0474688	-3.71222	-2.48522	0.725647	-0.703387	-0.371272	NaN	0	NaN	AT1G64110.1;AT1G64110.4;AT1G64110.2;AT1G64110.5;AT1G64110.3	343;348;348;346;346
AT1G64110	Target promoter of the male germline-specific transcription factor DUO1.	DUO1-ACTIVATED ATPASE 1 (DAA1)	DUO1-ACTIVATED ATPASE 1 (DAA1)	S	216	-2.8273	-0.716244	-1.50924	-3.4293	2.33901	1.77057	4.2779	2.96314	-3.04032	-2.00008	-3.97081	5.70669	5.55886	4.45118	-2.69361	-3.32557	-2.99163	2	___1	+	Col-0_W_Col-0_D	+	Col-0_D_ost1_D			1	4.29434e-99	273.26	249.07	157.31	0.75682	6921600000	216	0.000916143	-4.95817	-6.05908	0.0204569	-2.40125	-3.34426	0.289169	0.883085	1.18527	AT1G64110.1;AT1G64110.4;AT1G64110.2	216;221;221
AT1G64110	Target promoter of the male germline-specific transcription factor DUO1.	DUO1-ACTIVATED ATPASE 1 (DAA1)	DUO1-ACTIVATED ATPASE 1 (DAA1)	S	159	-3.25731	-2.33895	-2.97531	-2.593	2.05537	2.91097	3.45993	-3.87837	-3.24805	-2.87644	-2.64968	4.3761	2.93015	1.77742	-3.61316	-2.08768	-2.99677	3	___1							0.991546	5.25629e-43	201.92	186.64	195.42	0.013302	2818000000	159	0.0611919	-3.92812	-2.29891	0.409915	-1.89091	-0.898876	NaN	0	NaN	AT1G64110.1;AT1G64110.4;AT1G64110.2;AT1G64110.5;AT1G64110.3	159;164;164;164;164
AT1G64110	Target promoter of the male germline-specific transcription factor DUO1.	DUO1-ACTIVATED ATPASE 1 (DAA1)	DUO1-ACTIVATED ATPASE 1 (DAA1)	S	240	-4.50407	-2.93735	-3.28104	-3.0782	-0.62418	0.25844	0.553661	-1.44239	-3.24579	-3.2011	-2.65993	0.583021	1.15855	-0.945747	-2.80249	-2.89902	-3.74858	2	___1	+	Col-0_W_Col-0_D					0.999951	2.47089e-06	165.7	122.95	125.66	0.05779	2017400000	240	0.00160385	-3.13655	-5.43901	0.474821	-0.578892	-0.772333	NaN	0	NaN	AT1G64110.1;AT1G64110.4;AT1G64110.2;AT1G64110.5;AT1G64110.3	240;245;245;243;243
AT1G64110	Target promoter of the male germline-specific transcription factor DUO1.	DUO1-ACTIVATED ATPASE 1 (DAA1)	DUO1-ACTIVATED ATPASE 1 (DAA1)	S	221	-3.14062	-2.77535	-2.65355	-2.16837	1.14923	0.593594	3.18052	2.11307	-3.53198	-2.39265	-4.16915	4.01037	3.70525	3.05349	-3.38122	-4.56021	-3.46959	2	___1	+	Col-0_W_Col-0_D					1	4.17034e-99	292.97	263.48	130.09	0.68833	2280300000	221	0.000319298	-4.44358	-7.37216	0.0501264	-1.8306	-2.5685	NaN	0	NaN	AT1G64110.5;AT1G64110.3	221;221
AT1G64370	Encodes an intrinsically disordered plant protein that appears in condensates in the cytosol, in nuclei and nucleoli, binds RNA and can act as an RNA chaperone.	PHLOEM ASSOCIATED RNA CHAPERONE-LIKE (PARCL)	PHLOEM ASSOCIATED RNA CHAPERONE-LIKE (PARCL); (ATPARCL)	S	59	-3.46477	-2.28426	-2.74361	-3.56908	1.83157	2.82601	-0.589741	-3.40789	-2.82836	-3.38475	-4.03508	-3.49286	-3.84367	-2.29956	-3.28384	-3.21926	-2.94761	3	___1							1	1.56122e-87	281.24	261.69	223.76	-0.47708	854100000	59	0.0668521	-3.18041	-2.23449	0.102293	3.37702	1.99729	NaN	0	NaN	AT1G64370.1	59
AT1G64370	Encodes an intrinsically disordered plant protein that appears in condensates in the cytosol, in nuclei and nucleoli, binds RNA and can act as an RNA chaperone.	PHLOEM ASSOCIATED RNA CHAPERONE-LIKE (PARCL)	PHLOEM ASSOCIATED RNA CHAPERONE-LIKE (PARCL); (ATPARCL)	S	70	-4.92791	-2.16439	-2.50024	-3.28721	-1.19098	-0.719372	-2.59842	-2.9855	-2.55516	-3.39967	-4.54979	-3.3408	-1.53019	-3.4504	-2.60223	-2.92632	-2.86614	3	___1							0.999956	3.10287e-113	321.73	301.83	321.73	0.55228	1085300000	70	0.152669	-1.34637	-1.63736	0.32689	0.90023	1.08637	0.590306	-0.421709	-0.574825	AT1G64370.1	70
AT1G64370	Encodes an intrinsically disordered plant protein that appears in condensates in the cytosol, in nuclei and nucleoli, binds RNA and can act as an RNA chaperone.	PHLOEM ASSOCIATED RNA CHAPERONE-LIKE (PARCL)	PHLOEM ASSOCIATED RNA CHAPERONE-LIKE (PARCL); (ATPARCL)	S	96	-2.78015	-2.48905	-2.60192	-2.73402	1.81587	3.1467	0.358732	-2.94872	-2.84426	-2.84888	-2.82445	-3.26746	-2.33969	-3.55498	-3.24877	-3.3399	-1.79949	2	___1	+	Col-0_W_Col-0_D					1	9.07205e-16	179.46	164.83	179.46	0.31079	523650000	96	0.0483135	-3.24443	-2.4722	0.0691633	3.64719	2.30703	NaN	0	NaN	AT1G64370.1	96
AT1G64370	Encodes an intrinsically disordered plant protein that appears in condensates in the cytosol, in nuclei and nucleoli, binds RNA and can act as an RNA chaperone.	PHLOEM ASSOCIATED RNA CHAPERONE-LIKE (PARCL)	PHLOEM ASSOCIATED RNA CHAPERONE-LIKE (PARCL); (ATPARCL)	S	77	-3.03924	-2.96276	-2.97666	-3.1271	0.629873	2.02097	-1.77542	-3.9616	-3.87418	-2.94324	-3.01788	-3.26217	-1.93757	-2.77032	-3.94968	-3.06203	-3.45569	2	___1							1	1.22184e-07	136.27	111.93	136.27	-0.067206	233200000	77	0.138877	-2.2549	-1.70604	0.290748	1.88514	1.18091	NaN	0	NaN	AT1G64370.1	77
AT1G64500	A member of a protein family found in plants and animals that contain conserved C-terminal glutaredoxin-like and putative zinc-binding cysteine-rich domains. It is involved in light stimulated actin bundling and chloroplast movement. The mRNA is cell-to-cell mobile.	(THRUMIN1)	(THRUMIN1)	S	115	3.8672	3.03651	3.0144	3.71943	1.91096	1.59872	2.84652	3.8352	4.34552	4.2315	3.93078	2.64178	2.71942	3.53337	3.51315	3.35751	4.01289	3	___1							0.999924	3.59396e-24	225.13	201.06	191.89	-0.21423	4918600000	115	0.169466	0.861538	1.56134	0.545076	-0.417005	-0.648813	0.51525	-0.218462	-0.699824	AT1G64500.1	115
AT1G64790	ILITHYIA (ILA) is a HEAT repeat protein involved in plant immunity. The gene is also involved in systemic acquired resistance induced by P. syringae expressing avrRps4. Loss-of-function mutants of ILA caused pleiotropic defects in the mutant plants. The mutant plants are smaller in size and the leaves are serrated and yellow to light green in color. Required for bacterium-triggered stomatal closu…	ILITHYIA (ILA)	GENERAL CONTROL NON-DEREPRESSIBLE 1 (GCN1);NON-RESPONDING TO OXYLIPINS 7 (NOXY7);ILITHYIA (ILA)	S	1801	4.85701	4.48132	4.24973	4.61722	3.92473	3.76735	4.44054	5.21425	5.08833	5.24509	5.12434	4.73574	4.30782	4.84983	4.30919	4.48515	4.60943	2	___1							1	1.42868e-75	273.82	260.39	273.82	-0.054004	12900000000	1801	0.562085	0.214598	0.61347	0.504459	-0.294411	-0.718774	0.638787	0.0833958	0.499255	AT1G64790.1;AT1G64790.3;AT1G64790.2	1801;1872;1887
AT1G65010	Encodes a microtubule-associated protein. Putative role in flower development. Comparison of SALK_061426C to Columbia wild type in normal lighting and under low light of 33 micromoles per meter-squared per second resulted in a trend toward earlier bolting in the mutant under low light (P=0.055) (Ann Stapleton and Patrick Pridgen, 2009, personal communication).	0	0	S	50	-0.0476704	-2.56243	-1.90657	-2.67313	-0.188702	-0.158089	-0.878342	-0.150274	0.201079	0.246571	-0.408482	-2.8549	-1.89407	-3.76861	-2.24054	-3.69582	-0.10087	3	___1			+	Col-0_D_ost1_D			0.94797	1.79298e-06	110.75	95.819	110.75	-0.79279	199100000	50	0.0613878	-1.4536	-2.29658	0.0041219	2.49534	4.99512	0.856745	0.214959	0.19005	AT1G65010.1	50
AT1G65010	Encodes a microtubule-associated protein. Putative role in flower development. Comparison of SALK_061426C to Columbia wild type in normal lighting and under low light of 33 micromoles per meter-squared per second resulted in a trend toward earlier bolting in the mutant under low light (P=0.055) (Ann Stapleton and Patrick Pridgen, 2009, personal communication).	0	0	S	1270	2.22389	2.04377	2.33641	2.3859	0.927925	0.927794	0.950026	1.96452	2.79312	2.52002	3.30899	-1.86483	-3.43154	1.57544	2.20621	1.96266	2.98144	3	___1	+	Col-0_W_Col-0_D					0.999968	4.89984e-65	240.75	227.96	188.39	-0.21122	3063700000	1270	0.00769967	1.05493	3.93148	0.114467	2.43288	1.90945	0.638706	-0.135942	-0.49938	AT1G65010.1	1270
AT1G65320	Cystathionine beta-synthase (CBS) family protein;(source:Araport11)	CBS DOMAIN CONTAINING PROTEIN 6 (CBSX6)	CBS DOMAIN CONTAINING PROTEIN 6 (CBSX6)	S	337	1.76566	1.11767	1.19423	0.821486	0.177753	0.58033	0.605883	1.52174	1.51509	2.55756	1.88295	0.978117	1.44743	1.26103	0.871256	1.09328	0.793394	2	___1							0.931183	7.97561e-11	186.76	186.76	170.95	1.11	1265900000	337	0.196029	0.503335	1.45455	0.212421	-0.507433	-1.42886	0.268341	0.30545	1.24488	AT1G65320.1	337
AT1G65580	Endonuclease/exonuclease/phosphatase family protein;(source:Araport11)	FRAGILE FIBER3 (FRA3)	FRAGILE FIBER3 (FRA3)	S	68	0.472801	0.0172577	0.033823	-0.0677853	1.22132	1.04745	-1.04819	0.457554	0.79404	0.246941	0.160557	-3.61673	1.08575	-2.32807	-2.47196	-3.47893	-2.82711	3	___1					+	Col-0_W_5A-1_W	1	9.22138e-47	200.66	176.68	200.66	1.261	484230000	68	0.585259	-0.305509	-0.576469	0.183857	2.03922	1.54139	0.000126654	3.04003	10.6437	AT1G65580.1	68
AT1G65580	Endonuclease/exonuclease/phosphatase family protein;(source:Araport11)	FRAGILE FIBER3 (FRA3)	FRAGILE FIBER3 (FRA3)	S	355	-0.582403	-0.999174	-1.82609	-3.79628	-3.80689	-2.76179	-2.85356	0.276937	-0.720214	-1.1849	-0.221842	-3.26904	-3.30754	-4.51546	-3.26458	-3.22995	-3.23397	3	___1							0.999999	1.76648e-09	104.98	94.175	104.98	-0.16529	109730000	355	0.684627	0.485339	0.426492	0.257092	1.41102	1.27884	0.148397	1.44185	1.7077	AT1G65580.1;AT1G65580.2	355;89
AT1G65660	Encodes a CCHC zinc finger protein that may function as a step II splicing factor. In an epigenetic allele of SMP1 (in which SMP1 and SMP2 mRNA is reduced) organs are smaller and contain fewer cells.	SWELLMAP 1 (SMP1)	SWELLMAP 1 (SMP1)	S	193	-0.301472	-0.927492	-0.622614	-0.776865	-0.529165	-3.31081	0.518883	0.267921	-0.599259	-0.625755	-0.508686	-0.413786	-0.361645	-0.280565	-1.03961	-1.15915	-0.640535	3	___1							1	2.31022e-22	174.99	170.23	116.94	-0.07345	851460000	193	0.908746	0.106182	0.119545	0.708657	-0.411294	-0.395684	0.218542	0.289324	1.40664	AT1G65660.1	193
AT1G66090	Disease resistance protein (TIR-NBS class);(source:Araport11)	TIR-NBS3 (TN3)	TIR-NBS3 (TN3)	S	418	-1.86114	-2.97092	-2.5476	-2.53645	-1.98066	-2.85196	-2.7928	-3.43709	-2.35092	-3.1084	-2.08007	-1.95288	-2.52425	-2.96297	-2.23434	-2.95516	-4.15446	2	___1							0.999642	0.0463123	47.037	27.795	47.037	0.066873	30042000	418	0.476099	0.286604	0.759906	0.536402	-0.285595	-0.663453	0.293327	0.635628	1.17383	AT1G66090.1	418
AT5G37780	encodes a calmodulin that is involved in thigmomorphogenesis. Gene expression is rapidly induced upon a variety of abiotic stimuli, including water spray, subirrigation, wind, touch, wounding, or darkness.	CALMODULIN 1 (CAM1)	TOUCH 1 (TCH1);CALMODULIN 1 (CAM1); (ACAM-1)	S	102	-2.53782	-2.96691	-2.72419	-3.2523	-1.5391	-1.98816	-3.77581	-2.87581	-2.99205	-2.96769	-1.9299	-3.2448	-2.08089	-2.96663	-3.05437	-2.62105	-2.49504	2	___1							1	0.00555815	74.475	52.147	74.475	0.43592	34075000	102	0.553609	-0.325587	-0.627235	0.751514	0.219386	0.334589	NaN	0	NaN	AT5G37780.1;AT1G66410.1;AT1G66410.2;AT5G37780.2;AT5G37780.3;AT5G37780.4;AT3G43810.4;AT3G43810.3;AT1G66410.4;AT1G66410.3;AT5G21274.1;AT3G56800.1;AT3G43810.1;AT2G41110.1;AT2G27030.1;AT2G41110.2;AT2G27030.3;AT3G43810.2	102;102;112;117;128;89;66;66;66;66;102;102;102;102;102;114;102;102
AT1G66840	Encodes a coiled-coil protein WEB2 (weak chloroplast movement under blue light 2, also named PMI2/plastid movement impaired 2). Involved in chloroplast avoidance movement under intermediate and high light intensities. WEB2, together with another coiled-coil protein WEB1 (AT2G26570), maintains the chloroplast photorelocation movement velocity.	PLASTID MOVEMENT IMPAIRED 2 (PMI2)	PLASTID MOVEMENT IMPAIRED 2 (PMI2);WEAK CHLOROPLAST MOVEMENT UNDER BLUE LIGHT 2 (WEB2)	S	545	0.792645	0.497274	0.254333	0.510468	-1.61294	-1.69432	0.330757	-0.0522194	0.0177526	1.14409	-0.12184	-1.25216	-0.712799	0.25091	-0.09865	-0.231014	0.164043	3	___1					+	Col-0_W_5A-1_W	1	1.33701e-34	204.29	182.46	204.29	-0.69524	986650000	545	0.0551566	1.27086	2.37482	0.806771	-0.185833	-0.257888	0.0172529	0.568887	3.50171	AT1G66840.2;AT1G66840.1	545;545
AT1G66940	kinase-like protein;(source:Araport11)	0	0	S	321	1.84686	1.72969	1.23191	1.50221	-0.682247	-0.7349	0.807756	1.82808	1.7771	1.93589	2.09689	-0.507519	0.628218	1.52421	1.45812	1.5319	1.68545	3	___1							0.991164	4.69147e-54	223.12	206.68	183.47	0.0095473	1437300000	321	0.0921063	1.27299	2.0025	0.793942	-0.24363	-0.275518	0.914581	0.0191752	0.112796	AT1G66940.1;AT1G66940.4	321;350
AT1G67090	Encodes a member of the Rubisco small subunit (RBCS) multigene family: RBCS1A (At1g67090), RBCS1B (At5g38430), RBCS2B (At5g38420), and RBCS3B (At5g38410). Functions to yield sufficient Rubisco content for leaf photosynthetic capacity.	RIBULOSE BISPHOSPHATE CARBOXYLASE SMALL CHAIN 1A (RBCS1A)	RIBULOSE BISPHOSPHATE CARBOXYLASE SMALL CHAIN 1A (RBCS1A)	S	79	0.742426	0.14996	-0.0928307	0.464388	1.49682	1.9618	2.46615	2.08102	0.232924	0.706635	1.22071	0.851171	1.57098	1.09855	-0.363914	-0.102236	1.02175	2	___1	+	Col-0_W_Col-0_D	+	Col-0_D_ost1_D			0.999873	2.04993e-115	334.18	310.47	279.54	-0.11386	16538000000	79	0.000788127	-1.68546	-6.23437	0.0377154	0.827881	2.80623	0.765862	0.130785	0.314471	AT1G67090.1;AT1G67090.2	79;79
AT1G67090	Encodes a member of the Rubisco small subunit (RBCS) multigene family: RBCS1A (At1g67090), RBCS1B (At5g38430), RBCS2B (At5g38420), and RBCS3B (At5g38410). Functions to yield sufficient Rubisco content for leaf photosynthetic capacity.	RIBULOSE BISPHOSPHATE CARBOXYLASE SMALL CHAIN 1A (RBCS1A)	RIBULOSE BISPHOSPHATE CARBOXYLASE SMALL CHAIN 1A (RBCS1A)	S	135	-3.19308	-2.60596	-2.66938	-2.60366	-3.85333	-1.80821	-1.35199	-3.01813	-3.06546	-0.250002	-0.159412	-1.51156	-0.962467	-0.555632	-1.75313	-2.61507	-0.786606	2	___1							0.960368	5.79818e-19	168.5	110.69	168.5	1.5298	77706000	135	0.6734	-0.260106	-0.44284	0.0896111	-1.49803	-2.10125	0.077161	-1.04975	-2.21966	AT1G67090.1;AT5G38420.1;AT5G38410.1;AT5G38410.3;AT5G38410.2;AT5G38430.2;AT5G38430.1	135;135;135;140;128;135;135
AT1G67090	Encodes a member of the Rubisco small subunit (RBCS) multigene family: RBCS1A (At1g67090), RBCS1B (At5g38430), RBCS2B (At5g38420), and RBCS3B (At5g38410). Functions to yield sufficient Rubisco content for leaf photosynthetic capacity.	RIBULOSE BISPHOSPHATE CARBOXYLASE SMALL CHAIN 1A (RBCS1A)	RIBULOSE BISPHOSPHATE CARBOXYLASE SMALL CHAIN 1A (RBCS1A)	S	177	-1.91987	-2.25216	-2.28744	-3.2823	2.26215	2.91019	1.00287	-2.59964	-3.74215	-0.546028	-0.510374	-3.06618	-4.1687	-2.9575	-3.47885	-4.19626	-3.25784	3	___1	+	Col-0_W_Col-0_D	+	Col-0_D_ost1_D			0.867858	8.95109e-29	195.92	184.64	95.666	1.4345	597290000	177	0.0389253	-3.32934	-2.63257	0.034654	4.29135	2.87837	NaN	0	NaN	AT1G67090.1	177
AT1G67120	Represents a homolog of the yeast MDN gene, which encodes a non-ribosomal protein involved in the maturation and assembly of the 60S ribosomal subunit. In Arabidopsis, it is essential for female gametogenesis progression.	0	0	S	4797	0.341944	-2.92789	0.0202999	-0.388603	-2.57281	-1.1423	-0.817337	0.398161	0.420873	1.32902	0.731688	-3.43244	-3.01652	-2.96374	0.563902	-0.404917	0.125538	3	___1			+	Col-0_D_ost1_D			0.999998	0.000309296	62.193	56.112	62.193	0.24833	314060000	4797	0.769776	0.29501	0.306231	0.0350319	2.10399	2.86909	0.402742	-0.833402	-0.913789	AT1G67120.1;AT1G67120.2	4797;4804
AT1G67140	HEAT repeat-containing protein;(source:Araport11)	SWEETIE (SWEETIE)	SWEETIE (SWEETIE)	S	2065	0.940727	0.273525	0.352751	0.431709	-3.42212	-1.45459	1.03522	1.19579	0.640065	-3.451	0.860319	1.00289	0.678623	1.23239	0.703705	0.446512	0.916128	3	___1							0.999878	3.08848e-42	191.34	167.77	151.23	-0.22983	607910000	2065	0.33682	1.16111	1.04375	0.268182	-1.63273	-1.24535	0.411697	-0.189104	-0.895204	AT1G67140.1;AT1G67140.3;AT1G67140.2	2065;2066;2066
AT1G67140	HEAT repeat-containing protein;(source:Araport11)	SWEETIE (SWEETIE)	SWEETIE (SWEETIE)	S	2088	-3.16768	-2.4439	-3.37048	-3.86977	-3.38536	1.67183	-0.977568	-1.50604	-2.39295	-3.00804	-3.1041	-3.47513	0.464401	-3.26291	-3.23873	-3.10409	-3.68768	3	___1							0.98145	5.22192e-49	185.16	169.77	112.14	-0.51884	347030000	2088	0.0931627	-2.16367	-1.99427	0.551829	1.04193	0.637524	NaN	0	NaN	AT1G67140.1;AT1G67140.3;AT1G67140.2	2088;2089;2089
AT1G67140	HEAT repeat-containing protein;(source:Araport11)	SWEETIE (SWEETIE)	SWEETIE (SWEETIE)	S	2046	-0.648951	-2.58193	-1.55349	-3.12256	-2.54441	-3.46858	-3.56683	-0.426437	-1.24775	-0.785749	-1.04858	-3.35074	-2.90468	-1.5055	-2.80297	-1.87967	-0.748339	2	___1							0.999906	1.19958e-14	163.27	149.92	163.27	-0.97832	98298000	2046	0.586223	0.524834	0.574948	0.933933	0.085408	0.0871522	0.846869	-0.166407	-0.203362	AT1G67140.1;AT1G67140.3;AT1G67140.2	2046;2047;2047
AT1G67140	HEAT repeat-containing protein;(source:Araport11)	SWEETIE (SWEETIE)	SWEETIE (SWEETIE)	S	2141	-2.32194	-3.55728	-2.61739	-2.99065	1.33966	1.34369	-1.19787	-3.69176	-3.33219	-3.08584	-2.83138	-2.50309	-0.964291	-2.94069	-3.14207	-3.1004	-3.17913	2	___1							0.910307	1.4623e-29	197.28	174.8	197.28	0.50582	229200000	2141	0.109312	-2.32024	-1.87896	0.342743	1.58445	1.04773	NaN	0	NaN	AT1G67140.1;AT1G67140.3;AT1G67140.2	2141;2142;2142
AT1G67230	Encodes a nuclear coiled-coil protein related to the carrot peripheral nuclear protein NMCP1 that is involved in the determination of plant nuclear structure. Member of a small gene family in Arabidopsis containing 4 proteins (LNC1-4 or CRWN 1-4) with redundant functions in protection from oxidative damage, control of nuclear morphology and degradation of ABI5.	LITTLE NUCLEI1 (LINC1)	LITTLE NUCLEI1 (LINC1);CROWDED NUCLEI 1 (CRWN1);(JAPANESE FOR NUCLEUS) 2 (KAKU2); (ATLINC1)	S	932	2.32766	1.49575	1.44636	1.75566	2.16967	1.94871	2.28125	2.77144	2.67741	2.04035	2.61825	2.03761	2.54464	2.35805	1.34325	1.85126	2.19101	2	___1							0.888935	7.07536e-113	290.98	272.68	135.73	0.24281	2575500000	932	0.0909394	-0.53641	-2.01171	0.934766	-0.0206645	-0.0860505	0.906946	-0.0388153	-0.122937	AT1G67230.1	932
AT1G67230	Encodes a nuclear coiled-coil protein related to the carrot peripheral nuclear protein NMCP1 that is involved in the determination of plant nuclear structure. Member of a small gene family in Arabidopsis containing 4 proteins (LNC1-4 or CRWN 1-4) with redundant functions in protection from oxidative damage, control of nuclear morphology and degradation of ABI5.	LITTLE NUCLEI1 (LINC1)	LITTLE NUCLEI1 (LINC1);CROWDED NUCLEI 1 (CRWN1);(JAPANESE FOR NUCLEUS) 2 (KAKU2); (ATLINC1)	S	883	1.45529	0.951895	0.547384	0.884552	-0.592941	-0.432194	0.706974	1.58496	1.33954	1.31913	1.56915	0.434822	-0.243839	1.36105	1.30383	0.704935	1.38353	2	___1							1	2.18183e-57	246.16	223.55	139.9	-2.048	1138100000	883	0.283046	0.64308	1.17895	0.79174	-0.200642	-0.278554	0.574771	-0.170983	-0.599821	AT1G67230.1	883
AT1G67230	Encodes a nuclear coiled-coil protein related to the carrot peripheral nuclear protein NMCP1 that is involved in the determination of plant nuclear structure. Member of a small gene family in Arabidopsis containing 4 proteins (LNC1-4 or CRWN 1-4) with redundant functions in protection from oxidative damage, control of nuclear morphology and degradation of ABI5.	LITTLE NUCLEI1 (LINC1)	LITTLE NUCLEI1 (LINC1);CROWDED NUCLEI 1 (CRWN1);(JAPANESE FOR NUCLEUS) 2 (KAKU2); (ATLINC1)	S	885	1.33913	-2.85416	-2.82714	0.619068	-3.19439	-3.38154	1.01488	1.4417	1.49278	0.965832	1.27341	0.987768	-0.109022	1.66846	1.12224	0.957546	1.17127	2	___1							1	3.57192e-88	305.87	287.24	139.9	-2.048	898300000	885	0.955852	0.0990618	0.0577125	0.294815	-1.8789	-1.16977	0.186771	-2.01446	-1.52917	AT1G67230.1	885
AT1G67230	Encodes a nuclear coiled-coil protein related to the carrot peripheral nuclear protein NMCP1 that is involved in the determination of plant nuclear structure. Member of a small gene family in Arabidopsis containing 4 proteins (LNC1-4 or CRWN 1-4) with redundant functions in protection from oxidative damage, control of nuclear morphology and degradation of ABI5.	LITTLE NUCLEI1 (LINC1)	LITTLE NUCLEI1 (LINC1);CROWDED NUCLEI 1 (CRWN1);(JAPANESE FOR NUCLEUS) 2 (KAKU2); (ATLINC1)	S	774	-0.0244007	0.00174904	-0.0561333	0.61726	1.93705	2.05626	-3.2294	0.548067	0.657769	1.25302	1.20011	-3.10892	2.28971	1.38871	-3.89372	-2.60408	-3.571	2	___1					+	Col-0_W_5A-1_W	0.999972	5.48883e-29	194.58	180.5	194.58	0.3557	733420000	774	0.881635	-0.193375	-0.155357	0.948147	0.138158	0.0683628	0.000244389	3.49089	9.27961	AT1G67230.1	774
AT1G67230	Encodes a nuclear coiled-coil protein related to the carrot peripheral nuclear protein NMCP1 that is involved in the determination of plant nuclear structure. Member of a small gene family in Arabidopsis containing 4 proteins (LNC1-4 or CRWN 1-4) with redundant functions in protection from oxidative damage, control of nuclear morphology and degradation of ABI5.	LITTLE NUCLEI1 (LINC1)	LITTLE NUCLEI1 (LINC1);CROWDED NUCLEI 1 (CRWN1);(JAPANESE FOR NUCLEUS) 2 (KAKU2); (ATLINC1)	S	865	-0.22974	-0.866705	-0.94623	-0.764305	0.93442	0.90081	0.235624	0.199766	-0.625392	-0.691658	-0.686089	-0.0943909	1.38412	-0.525326	-1.38919	-0.8398	-0.685291	2	___1	+	Col-0_W_Col-0_D					0.999998	1.18002e-133	357.93	326.51	357.93	-0.050068	495270000	865	0.00270614	-1.2694	-4.90174	0.587294	0.312852	0.579638	0.350162	0.269684	1.03017	AT1G67230.1	865
AT1G67230	Encodes a nuclear coiled-coil protein related to the carrot peripheral nuclear protein NMCP1 that is involved in the determination of plant nuclear structure. Member of a small gene family in Arabidopsis containing 4 proteins (LNC1-4 or CRWN 1-4) with redundant functions in protection from oxidative damage, control of nuclear morphology and degradation of ABI5.	LITTLE NUCLEI1 (LINC1)	LITTLE NUCLEI1 (LINC1);CROWDED NUCLEI 1 (CRWN1);(JAPANESE FOR NUCLEUS) 2 (KAKU2); (ATLINC1)	S	979	-3.60453	-3.31062	-2.3686	-4.25439	-0.877518	-2.57493	-3.35923	-4.10681	-2.49835	-1.70575	-3.10818	-2.81446	-3.10044	-4.00029	-2.76376	-1.52988	-4.55074	3	___1							0.998501	3.70771e-29	180.65	168.16	180.65	0.12298	45265000	979	0.441726	-0.654914	-0.823487	0.538361	0.575441	0.660133	0.636441	-0.43641	-0.502835	AT1G67230.1	979
AT1G67230	Encodes a nuclear coiled-coil protein related to the carrot peripheral nuclear protein NMCP1 that is involved in the determination of plant nuclear structure. Member of a small gene family in Arabidopsis containing 4 proteins (LNC1-4 or CRWN 1-4) with redundant functions in protection from oxidative damage, control of nuclear morphology and degradation of ABI5.	LITTLE NUCLEI1 (LINC1)	LITTLE NUCLEI1 (LINC1);CROWDED NUCLEI 1 (CRWN1);(JAPANESE FOR NUCLEUS) 2 (KAKU2); (ATLINC1)	S	1105	-2.39584	-1.02756	-0.505991	-0.997833	-3.74032	2.64029	0.374573	0.143787	-0.215806	-3.04402	-3.42868	-2.09792	-0.437687	-2.27028	-2.63992	-3.53173	-0.445303	3	___1							0.994042	1.39372e-07	114.71	106.88	98.225	-1.1092	675900000	1105	0.462615	-1.08639	-0.784446	0.415444	1.45654	0.887523	0.331176	0.973847	1.07577	AT1G67230.1	1105
AT1G67310	Calmodulin-binding transcription activator protein with CG-1 and Ankyrin domain;(source:Araport11)	0	0	S	935	-0.527168	-1.60353	-0.580347	-1.03435	-1.72568	-1.42671	-1.23666	-0.53821	-0.857388	-1.34673	-0.811384	0.767693	-1.26023	-0.0714607	-0.742889	-0.739796	-1.72221	2	___1							1	1.42711e-34	205.68	177.5	205.68	0.10604	837010000	935	0.437046	0.295468	0.832415	0.129484	-1.04382	-1.81352	0.756468	0.131949	0.327626	AT1G67310.1	935
AT1G67580	Cyclin dependent kinase. Regulates stress responses and FLOWERING LOCUS M mRNA splicing. Acts downstream of UBP14/DA3-CDKB1;1 in control of endoreduplication and cell growth pathway.	CYCLIN-DEPENDENT KINASE G2 (CDKG2)	CYCLIN-DEPENDENT KINASE G2 (CDKG2)	S	728	-2.61106	-0.695625	-0.539021	-1.9602	-3.91711	-3.12209	-2.81021	-4.26241	-2.57258	-3.81342	-4.3178	-1.52942	-2.41453	-3.19754	-3.94111	-1.95857	-3.18741	2	___1	+	Col-0_W_Col-0_D					1	4.6959e-06	119.88	97.406	66.498	0.5998	102620000	728	0.0138386	2.07648	3.43778	0.0992765	-1.14746	-2.02074	0.094025	1.57755	2.0634	AT1G67580.2;AT1G67580.1	728;728
AT1G67680	SRP72 RNA-binding domain-containing protein;(source:Araport11)	0	0	S	14	-3.52324	-3.18329	-2.43258	-3.35729	-0.68272	-0.153986	-0.384165	-2.101	-3.38278	-3.60999	-3.26367	-3.13286	-3.72898	-2.43124	-2.63891	-2.4487	-3.65574	3	___1	+	Col-0_W_Col-0_D	+	Col-0_D_ost1_D			0.9156	0.00796133	50.144	42.106	50.144	-1.8445	84012000	14	0.00370663	-2.29363	-4.59624	0.0133239	2.26723	3.7478	NaN	0	NaN	AT1G67680.1	14
AT1G67900	Encodes a gene homologous to the NPY family based on deep phylogeny.	(NPY8)	(NPY8)	S	384	-0.942366	-3.19135	-2.42263	-1.81572	-2.06298	-1.62633	-2.14244	-1.02865	-1.01821	-0.842627	-3.70457	-3.23184	-1.33719	-3.54183	-1.35356	-1.55995	-1.67252	2	___1							1	1.06907e-12	152.88	116.53	152.88	-2.9557	364610000	384	0.5102	-0.377916	-0.699903	0.189302	0.988522	1.51869	0.366287	-0.564338	-0.993039	AT1G67900.6;AT1G67900.5;AT1G67900.4;AT1G67900.3;AT1G67900.2;AT1G67900.1	384;384;384;384;384;384
AT1G67900	Encodes a gene homologous to the NPY family based on deep phylogeny.	(NPY8)	(NPY8)	S	382	-0.942366	-3.57321	-3.14173	-1.81572	-2.06298	-1.62633	-2.14244	-1.02865	-1.01821	-0.842627	-0.710691	-2.27149	-1.33719	-2.84765	-1.35356	-1.55995	-1.67252	2	___1							0.999999	0.000449453	76.151	61.719	66.246	-1.6807	154000000	382	0.358173	-0.653157	-0.994958	0.401003	0.437011	0.917434	0.296054	-0.839579	-1.1664	AT1G67900.6;AT1G67900.5;AT1G67900.4;AT1G67900.3;AT1G67900.2;AT1G67900.1	382;382;382;382;382;382
AT1G67900	Encodes a gene homologous to the NPY family based on deep phylogeny.	(NPY8)	(NPY8)	S	567	-0.204857	0.419874	-2.40009	-2.64804	-2.05308	-4.05373	-3.85593	-3.27853	-0.0483103	0.398762	-2.04586	-3.81842	-1.84564	-0.16152	-3.4487	-3.7357	-3.02884	2	___1							0.999972	0.000241775	102.73	65.014	102.73	1.1991	135390000	567	0.0568849	2.10204	2.35223	0.242255	-1.36846	-1.32577	0.064513	2.19613	2.36297	AT1G67900.6;AT1G67900.5;AT1G67900.4;AT1G67900.3;AT1G67900.2;AT1G67900.1	567;567;567;567;567;567
AT1G67910	hypothetical protein;(source:Araport11)	0	0	S	70	-0.967878	-2.06453	-3.13783	-2.72152	-3.27949	-3.442	-3.39822	-3.2678	-0.326735	-0.335629	-2.921	-3.24804	-2.58477	-1.34374	-0.90147	-0.118685	-1.78687	2	___1							1	7.02798e-24	173.98	150.3	134.21	0.15318	148500000	70	0.0558396	1.12394	2.3658	0.0978103	-0.954692	-2.03241	0.121032	-1.28727	-1.86601	AT1G67910.2;AT1G67910.1	70;70
AT1G67950	ACD11 binding partner, negatively regulates ROS-mediated defense response.	BPA1-LIKE 2 (BPL2)	BPA1-LIKE 2 (BPL2)	S	207	1.31684	-3.12469	-3.34208	1.13295	-3.67603	-0.15041	0.0808983	0.597025	1.41413	1.23057	1.26544	-3.56769	0.96011	-0.0766449	1.75753	0.599583	1.13085	2	___1							0.965636	2.28504e-11	196.15	161.43	196.15	-1.2472	551810000	207	0.897515	-0.217118	-0.134356	0.949812	0.107612	0.0661629	0.220928	-2.1669	-1.39814	AT1G67950.4;AT1G67950.1;AT1G67950.3;AT1G67950.2	207;266;267;267
AT1G68010	Encodes hydroxypyruvate reductase.	HYDROXYPYRUVATE REDUCTASE (HPR)	HYDROXYPYRUVATE REDUCTASE (HPR)	S	365	-1.33254	-2.8025	-3.37251	-3.22952	-2.34798	-3.33003	-3.2015	0.7983	1.01387	0.649132	0.84856	-0.86109	-0.606155	0.274725	-3.49892	0.627947	1.00667	4	___1							0.999976	1.96855e-18	126.56	109.11	97.446	1.308	383930000	365	0.558225	-0.663968	-0.619723	0.226437	-1.62279	-1.37884	0.1809	-2.06284	-1.554	AT1G68010.1;AT1G68010.2	365;366
AT1G68020	Encodes an enzyme putatively involved in trehalose biosynthesis. The protein has a trehalose synthase (TPS)-like domain and a trehalose phosphatase (TPP)-like domain. It can complement a yeast mutant lacking both of these activities suggesting that this is a bifunctional enzyme.	(ATTPS6)	TREHALOSE -6-PHOSPHATASE SYNTHASE S6 (TPS6); (ATTPS6)	S	5	1.30827	1.24677	0.26339	0.930073	0.584984	0.831472	1.8781	2.37903	1.65604	1.29754	2.20097	1.49395	1.50155	2.31571	0.927631	1.44193	1.73699	2	___1							0.99913	3.9919e-65	266.39	251.83	266.39	-0.20413	1271500000	5	0.362352	-0.481273	-0.985685	0.552281	-0.352004	-0.636772	0.266753	-0.431727	-1.24959	AT1G68020.1;AT1G68020.3;AT1G68020.2	5;5;5
AT1G68020	Encodes an enzyme putatively involved in trehalose biosynthesis. The protein has a trehalose synthase (TPS)-like domain and a trehalose phosphatase (TPP)-like domain. It can complement a yeast mutant lacking both of these activities suggesting that this is a bifunctional enzyme.	(ATTPS6)	TREHALOSE -6-PHOSPHATASE SYNTHASE S6 (TPS6); (ATTPS6)	S	17	-2.0443	-3.06892	-2.70567	-3.20974	-1.42424	-0.754644	-3.42885	-1.59766	-3.26049	-3.01231	-3.55155	-4.52676	-1.20455	-3.04122	-3.38735	-2.93068	-4.43594	2	___1							0.903484	1.02165e-50	235.68	214.59	235.68	-0.99141	161520000	17	0.17916	-0.955811	-1.52066	0.334186	1.12283	1.0684	0.147707	0.827499	1.71131	AT1G68020.1;AT1G68020.3;AT1G68020.2	17;17;17
AT1G68060	Encodes a microtubule associated protein (MAP70-1). Expressed in all tissues.	MICROTUBULE-ASSOCIATED PROTEINS 70-1 (MAP70-1)	MICROTUBULE-ASSOCIATED PROTEINS 70-1 (MAP70-1);MICROTUBULE-ASSOCIATED PROTEINS 70-1 (ATMAP70-1)	S	475	-1.08658	-0.834095	-0.509108	-3.38697	-1.15371	-1.76186	-1.59227	-1.59494	-0.363385	-0.459871	-2.05654	-1.43542	-1.65328	-1.10562	-1.07666	-0.80179	-1.60491	2	___1							1	0.000203899	131.82	103.6	131.82	-0.062957	196830000	475	0.918222	0.0715051	0.107072	0.55844	-0.127587	-0.626557	0.729012	-0.293066	-0.366468	AT1G68060.1	475
AT1G68070	Zinc finger, C3HC4 type (RING finger) family protein;(source:Araport11)	0	0	S	143	2.24135	1.4644	-1.93089	-3.68458	0.807066	0.754272	1.08504	1.72913	-3.37878	-2.37924	-3.22006	0.423107	0.691895	-3.8945	1.02674	-2.96816	-2.44694	3	___1							1	1.79417e-25	178.7	170.3	178.7	-0.70622	879180000	143	0.310549	-1.57131	-1.10735	0.17285	2.02038	1.58935	0.636833	0.985358	0.502237	AT1G68070.1	143
AT1G68410	Protein phosphatase 2C family protein;(source:Araport11)	0	0	S	314	-0.404472	-2.25079	-3.19155	-2.62122	0.554203	0.327993	-0.290062	0.0448818	1.03475	-2.15331	-3.84803	-2.6805	-3.23117	-2.59885	0.538282	0.706957	0.689293	3	___1	+	Col-0_W_Col-0_D	+	Col-0_D_ost1_D	+	Col-0_W_5A-1_W	1	2.24959e-06	82.508	72.791	82.508	1.1398	325240000	314	0.0111696	-2.27626	-3.61457	0.000108101	2.99609	10.999	0.0118197	-2.76185	-3.86502	AT1G68410.4;AT1G68410.3;AT1G68410.2;AT1G68410.1	314;314;314;314
AT1G68790	Member of small gene family in Arabidopsis containing 4 members (LNC1-4 or CRWN 1-4) with redundant functions in protection from oxidative damage, control of nuclear morphology and degradation of ABI5.	LITTLE NUCLEI3 (LINC3)	LITTLE NUCLEI3 (LINC3);CROWDED NUCLEI 3 (CRWN3)	S	910	0.186579	-3.31755	-2.83245	-2.87777	1.14348	0.766493	0.541887	0.883547	0.0240278	0.0110531	0.284685	0.453455	1.06364	0.403275	0.126417	-0.293941	0.0246086	2	___1	+	Col-0_W_Col-0_D					0.999986	1.00677e-42	211.75	195.45	199.58	0.58751	870090000	910	0.00973399	-3.04415	-3.73023	0.440393	0.193729	0.837698	0.0740243	-2.16266	-2.25272	AT1G68790.1	910
AT1G68790	Member of small gene family in Arabidopsis containing 4 members (LNC1-4 or CRWN 1-4) with redundant functions in protection from oxidative damage, control of nuclear morphology and degradation of ABI5.	LITTLE NUCLEI3 (LINC3)	LITTLE NUCLEI3 (LINC3);CROWDED NUCLEI 3 (CRWN3)	S	818	-2.29019	-3.76518	-4.1501	-3.80174	1.8206	1.61007	-1.07238	-2.18201	-2.9335	-3.61451	-2.59056	-1.75911	0.825693	-3.22359	-2.14964	-3.53751	-4.00379	3	___1	+	Col-0_W_Col-0_D					0.994785	1.60634e-48	186.24	173.56	186.24	-0.23939	337540000	818	0.0164156	-3.54587	-3.29962	0.394621	1.42974	0.930926	0.704247	-0.27149	-0.402066	AT1G68790.1	818
AT1G68830	STN7 protein kinase; required for state transitions, phosphorylation of the major antenna complex (LHCII) between PSII and PSI, and light adaptation. STN7 is involved in state transitions.	STT7 HOMOLOG STN7 (STN7)	STT7 HOMOLOG STN7 (STN7)	S	526	-1.85276	-2.73226	-2.73947	-2.53101	0.0838165	-0.554035	-2.47321	-2.74403	-2.59532	-1.07563	-3.436	-3.37535	-0.0800037	-2.74625	-2.19874	-3.97551	-2.49549	2	___1							1	0.00283694	104.22	29.065	104.22	-0.42782	114140000	526	0.203517	-1.04201	-1.42688	0.608838	0.645338	0.545525	0.45172	0.426039	0.815785	AT1G68830.1	526
AT1G69040	ACT-domain containing protein involved in feedback regulation of amino acid metabolism	ACT DOMAIN REPEAT 4 (ACR4)	ACT DOMAIN REPEAT 4 (ACR4)	S	440	-0.89374	-1.35392	-2.25188	-1.31361	-2.47362	-3.27023	-1.75515	-0.386906	-0.688052	-0.432411	-0.425457	-1.90772	-1.56136	-0.120798	-1.117	-1.17941	-0.465025	2	___1							1	0.000304179	125.71	104.34	107.79	-0.4558	174070000	440	0.472153	0.51819	0.767037	0.40728	-0.77485	-0.90433	0.228521	-0.532809	-1.37165	AT1G69040.1;AT1G69040.2	440;444
AT1G69160	suppressor;(source:Araport11)	BIG GRAIN LIKE 1 (BGL1)	BIG GRAIN LIKE 1 (BGL1)	S	264	0.0148315	-0.747599	-0.554987	-0.798632	-2.4608	-2.20929	-2.84006	-0.893482	-0.240867	-0.697569	-0.719761	-3.17715	-4.41889	-1.68634	-0.382288	-0.0826969	-0.429354	2	___1	+	Col-0_W_Col-0_D					1	2.9925e-15	175.21	155.12	71.548	-1.3889	209960000	264	0.0141811	1.57931	3.41785	0.28452	0.993218	1.19823	0.391688	-0.223484	-0.937185	AT1G69160.1	264
AT1G69220	Encodes serine/threonine kinase 1 (SIK1), a Hippo homolog. Regulates cell proliferation and cell expansion.	(SIK1)	(SIK1)	S	235	-1.06421	-1.8518	-1.20649	-1.22264	-3.01585	-1.98773	-0.956202	-1.47389	-2.17576	-2.63251	-2.25558	-1.6842	-3.55399	-1.4323	-0.785866	-1.86041	-1.8967	2	___1							0.788445	2.70971e-06	117.93	83.68	117.93	0.59826	129370000	235	0.312188	0.522134	1.10326	0.652985	0.365078	0.477747	0.649707	0.178043	0.482691	AT1G69220.1	235
AT1G69260	ABI five binding protein;(source:Araport11)	ABI FIVE BINDING PROTEIN (AFP1)	ABI FIVE BINDING PROTEIN (AFP1)	S	194	-2.82951	-2.67523	-2.49291	-3.7098	1.54285	1.43849	1.35726	1.09322	-2.99202	-2.91087	-1.88801	-2.61013	2.42636	-2.72857	-2.55571	-3.59376	-3.27979	2	___1	+	Col-0_W_Col-0_D					1	4.51011e-65	250.2	237.93	250.2	-0.62685	859950000	194	5.62488e-06	-4.28482	-14.9566	0.163374	2.32874	1.63311	NaN	0	NaN	AT1G69260.1	194
AT1G69260	ABI five binding protein;(source:Araport11)	ABI FIVE BINDING PROTEIN (AFP1)	ABI FIVE BINDING PROTEIN (AFP1)	S	16	-3.71774	-2.45514	-2.4548	-3.03922	-1.02166	-1.2903	-2.72588	-2.92545	-3.7924	-4.96319	-3.94309	-3.31689	-1.17589	-1.21699	-3.18946	-2.51207	-2.67911	2	___1							0.999839	0.00317808	100.48	71.75	100.48	-0.092853	55783000	16	0.156669	-0.925901	-1.61856	0.919652	-0.0875682	-0.106068	NaN	0	NaN	AT1G69260.1	16
AT1G69260	ABI five binding protein;(source:Araport11)	ABI FIVE BINDING PROTEIN (AFP1)	ABI FIVE BINDING PROTEIN (AFP1)	S	71	-2.91547	-2.91134	-2.9397	-2.59734	0.873869	0.622004	1.21679	-0.448128	-3.0777	-4.25972	-3.39495	1.30419	1.46909	1.21995	-3.27125	-3.56589	-2.83303	2	___1	+	Col-0_W_Col-0_D					0.996546	1.89937e-12	155.48	137.66	155.48	-0.11235	418350000	71	9.04121e-05	-3.40709	-9.24584	0.135102	-0.764943	-1.78053	0.117621	0.382429	1.88827	AT1G69260.1	71
AT1G69260	ABI five binding protein;(source:Araport11)	ABI FIVE BINDING PROTEIN (AFP1)	ABI FIVE BINDING PROTEIN (AFP1)	S	115	-2.65374	-3.00381	-2.621	-2.01054	2.40182	-3.10294	2.83494	1.93164	-1.72664	-2.22316	-3.41839	3.21958	2.73175	-3.63864	-3.02998	-2.78354	-3.33548	2	___1	+	Col-0_W_Col-0_D					0.999817	6.62981e-09	136.99	123.08	136.99	-1.6997	1156200000	115	0.0427927	-3.58864	-2.56201	0.924716	0.245467	0.0993559	0.146885	0.477397	1.71564	AT1G69260.1	115
AT1G69340	appr-1-p processing enzyme family protein;(source:Araport11)	0	0	S	318	0.640488	0.518581	0.566666	1.32992	1.31374	1.13549	1.65392	1.50111	0.345115	-3.99413	0.808552	-0.0200806	-0.278109	0.786163	0.539707	0.70426	1.07464	3	___1	+	Col-0_W_Col-0_D	+	Col-0_D_ost1_D			1	2.52741e-21	167.51	151.03	167.51	-0.52892	915060000	318	0.0280099	-0.637149	-2.8813	0.00903377	1.23841	4.13581	0.973981	-0.00895389	-0.0342786	AT1G69340.2;AT1G69340.1	318;318
AT1G69410	Encodes eIF5A-2, a putative eukaryotic translation initiation factor. There are three eIF5A coding genes in Arabidopsis: eIF5A-1/At1g13950, eIF5A-2/At1g26630 and eIF5A-3/At1g69410.	EUKARYOTIC ELONGATION FACTOR 5A-3 (ELF5A-3)	EUKARYOTIC ELONGATION FACTOR 5A-3 (ATELF5A-3);EUKARYOTIC ELONGATION FACTOR 5A-3 (ELF5A-3)	S	2	0.552479	1.14036	0.629875	-0.091177	0.984625	0.316242	-1.13282	0.281425	1.77826	3.24154	-3.73008	2.72706	0.0859222	1.86395	-0.620785	-0.0956745	0.652781	2	___1							1	3.39863e-46	243.69	225.67	222.27	0.064711	933990000	2	0.417772	0.445516	0.86994	0.144608	-1.44661	-1.72776	0.235903	0.579111	1.34668	AT1G69410.1	2
AT1G69510	cAMP-regulated phosphoprotein 19-related protein;(source:Araport11)	0	0	S	56	-0.526089	-0.420824	-1.11016	-0.797403	-1.02299	-1.86892	-0.738909	-0.143894	-0.528806	-0.289946	-0.0492878	-2.59135	-0.479248	-0.94656	-0.982317	-0.216158	0.061758	2	___1							1	9.43309e-07	124.12	101	102.66	0.13873	271320000	56	0.57718	0.230061	0.589267	0.588088	0.395373	0.578368	0.341527	-0.334713	-1.05064	AT1G69510.3;AT1G69510.2;AT1G69510.1	56;56;56
AT1G69800	Cystathionine beta-synthase (CBS) protein;(source:Araport11)	0	0	S	17	-2.71757	-2.1095	-3.466	-2.81621	0.930515	0.955061	-2.33111	-2.49624	-2.98966	-2.2754	-3.93077	-2.94698	0.0535374	-3.40869	-2.66013	-3.26043	-3.03272	2	___1							0.980149	1.85726e-12	155.66	134.82	143.98	-0.15617	182280000	17	0.0893236	-2.04188	-2.02465	0.393572	1.36527	0.93316	NaN	0	NaN	AT1G69800.3;AT1G69800.1;AT1G69800.2	17;17;46
AT1G70100	neurofilament heavy protein;(source:Araport11)	0	0	S	99	1.94735	2.19487	1.74919	1.90465	-2.82787	-2.54673	1.03142	1.42569	2.06401	2.31893	1.36416	-0.19894	-1.50713	1.94644	1.36815	1.43782	1.11249	2	___1					+	Col-0_W_5A-1_W	1	0.000306635	96.604	80.512	52.247	0.69136	1122800000	99	0.0568552	2.67839	2.35261	0.631274	-0.809496	-0.510744	0.00538428	0.642863	4.69017	AT1G70100.5;AT1G70100.2;AT1G70100.1;AT1G70100.4;AT1G70100.6;AT1G70100.3	99;99;99;99;99;99
AT1G70180	Sterile alpha motif (SAM) domain-containing protein;(source:Araport11)	0	0	S	26	-1.89889	-2.93044	-2.9596	-3.7348	0.250481	-0.0684624	-3.75406	-0.609161	-3.65412	-3.20581	-1.21682	-3.89465	-2.2515	-2.61364	-2.65514	-3.19044	-2.65371	2	___1							0.999998	0.000581093	82.102	67.844	82.102	-0.82555	118050000	26	0.114391	-1.83563	-1.8462	0.168776	1.87463	1.60787	0.922896	-0.0478341	-0.101768	AT1G70180.6;AT1G70180.5;AT1G70180.3;AT1G70180.4;AT1G70180.1;AT1G70180.2	26;26;26;26;26;26
AT1G70180	Sterile alpha motif (SAM) domain-containing protein;(source:Araport11)	0	0	S	242	-0.432522	0.0298233	-0.135094	-0.727682	-1.47884	-2.58389	-0.831261	-1.09838	-0.446639	-0.431629	-1.35875	-0.332308	-1.21114	-0.132797	-2.67226	-0.624641	-1.69618	2	___1	+	Col-0_W_Col-0_D					1	0.0127563	68.069	53.402	47.288	-0.26931	256320000	242	0.0306725	1.18173	2.81207	0.138754	-0.939345	-1.75983	0.0525305	1.34799	2.52999	AT1G70180.6;AT1G70180.5;AT1G70180.3;AT1G70180.4;AT1G70180.1;AT1G70180.2	242;242;226;242;242;242
AT1G70180	Sterile alpha motif (SAM) domain-containing protein;(source:Araport11)	0	0	S	321	0.0931244	-0.199076	0.00844193	-0.327019	-2.88553	-3.05389	-0.468092	-0.221939	-0.0986681	0.00728607	-0.270372	-2.54192	-1.1629	0.473978	-0.951008	-0.205915	-1.62592	3	___1							0.999364	0.000407767	81.428	57.14	81.428	0.46043	295930000	321	0.0893145	1.55123	2.02472	0.637476	-0.580413	-0.501255	0.0721415	0.821483	2.27329	AT1G70180.6;AT1G70180.5;AT1G70180.3;AT1G70180.4;AT1G70180.1;AT1G70180.2	321;321;305;321;321;321
AT1G70320	encodes a ubiquitin-protein ligase-like protein containing a HECT domain. There are six other HECT-domain UPLs in Arabidopsis.	UBIQUITIN-PROTEIN LIGASE 2 (UPL2)	UBIQUITIN-PROTEIN LIGASE 2 (UPL2)	S	2582	2.0418	0.429268	0.45661	1.39971	0.221991	0.312658	1.93149	2.76595	2.01387	1.70259	2.4244	1.4291	1.5033	2.08163	-2.31077	1.02445	2.10241	3	___1							1	8.22315e-49	189.3	180.53	189.3	1.051	1301100000	2582	0.769399	-0.226177	-0.306753	0.652427	-0.363319	-0.478588	0.531046	0.809816	0.672568	AT1G70320.1	2582
AT1G70410	Encodes a putative beta-carbonic anhydrase betaCA4. Together with betaCA1 (At3g01500) regulates CO2-controlled stomatal movements in guard cells, as well as attenuates immunity. Differential CA gene expression in response to changing atmospheric CO2 conditions contribute to altered disease resistance levels.	BETA CARBONIC ANHYDRASE 4 (BCA4)	BETA CARBONIC ANHYDRASE 4 (BCA4);BETA CARBONIC ANHYDRASE 4 (ATBCA4)	S	68	-1.35826	-2.48342	-2.56501	-3.27776	-0.331682	-0.318251	-2.90673	-1.7917	-2.01874	-2.93215	-2.83597	-1.10739	-1.48268	-3.5877	-3.78268	-2.44767	-3.61483	2	___1							0.975139	2.12551e-05	120.53	101.26	120.53	0.69614	103610000	68	0.194353	-1.08402	-1.46087	0.495822	0.722165	0.734146	0.202016	0.860615	1.46806	AT1G70410.3;AT1G70410.1;AT1G70410.2	68;68;90
AT1G70770	Involved in cell wall modifications resulting in resistance to the biotroph Hpa.	0	0	S	87	1.55874	1.49341	1.11148	-0.488365	-0.262865	1.09598	-3.5699	3.19196	2.46983	3.37258	2.71364	1.34214	1.4488	2.79496	1.30993	1.3982	2.28514	2	___1							1	7.87143e-17	194.12	180.12	170.79	-0.49899	6054500000	87	0.610199	0.805023	0.537597	0.356987	-1.74817	-1.01428	0.285797	-0.745603	-1.19465	AT1G70770.2;AT1G70770.1	87;87
AT1G70770	Involved in cell wall modifications resulting in resistance to the biotroph Hpa.	0	0	S	112	2.09492	1.37853	1.49115	1.54886	0.956308	0.982531	1.81109	2.53552	2.35082	1.32297	2.64878	2.34776	1.78167	2.23082	1.48907	1.88313	2.08881	2	___1							0.999999	1.08002e-102	290.56	275.08	242.9	-1.605	2351700000	112	0.893981	0.0570011	0.139023	0.295346	-0.54872	-1.16833	0.458901	-0.191975	-0.802106	AT1G70770.2;AT1G70770.1	112;112
AT1G70940	A regulator of auxin efflux and involved in differential growth. PIN3 is expressed in gravity-sensing tissues, with PIN3 protein accumulating predominantly at the lateral cell surface. PIN3 localizes to the plasma membrane and to vesicles. In roots, PIN3 is expressed without pronounced polarity in tiers two and three of the columella cells, at the basal side of vascular cells, and to the lateral …	PIN-FORMED 3 (PIN3)	PIN-FORMED 3 (PIN3);ARABIDOPSIS PIN-FORMED 3 (ATPIN3)	S	389	0.117666	-0.275278	-0.556221	-2.80342	-2.83226	-1.00762	-3.64482	0.755173	0.344253	-2.99046	0.314117	-3.21141	-2.21475	-2.8907	-3.04522	-3.19686	-3.68428	3	___1					+	Col-0_W_5A-1_W	1	1.66533e-09	121.02	106.09	72.755	0.26962	202710000	389	0.521851	0.803069	0.680018	0.400839	1.08991	0.917779	0.0279695	2.42947	3.06415	AT1G70940.1	389
AT1G70940	A regulator of auxin efflux and involved in differential growth. PIN3 is expressed in gravity-sensing tissues, with PIN3 protein accumulating predominantly at the lateral cell surface. PIN3 localizes to the plasma membrane and to vesicles. In roots, PIN3 is expressed without pronounced polarity in tiers two and three of the columella cells, at the basal side of vascular cells, and to the lateral …	PIN-FORMED 3 (PIN3)	PIN-FORMED 3 (PIN3);ARABIDOPSIS PIN-FORMED 3 (ATPIN3)	S	417	-3.04681	-3.13469	-2.63683	-3.32515	-0.289936	-0.463385	-1.04997	-1.73612	-2.99893	-2.99103	-3.48158	-3.15554	-3.35045	-2.91975	-2.74931	-2.68861	-1.03102	3	___1	+	Col-0_W_Col-0_D	+	Col-0_D_ost1_D			1	1.36138e-08	125.78	117.46	125.78	0.78258	156080000	417	0.000954716	-2.15102	-6.01171	0.00244555	2.25706	5.63221	0.139705	-0.879556	-1.75453	AT1G70940.1	417
AT1G70940	A regulator of auxin efflux and involved in differential growth. PIN3 is expressed in gravity-sensing tissues, with PIN3 protein accumulating predominantly at the lateral cell surface. PIN3 localizes to the plasma membrane and to vesicles. In roots, PIN3 is expressed without pronounced polarity in tiers two and three of the columella cells, at the basal side of vascular cells, and to the lateral …	PIN-FORMED 3 (PIN3)	PIN-FORMED 3 (PIN3);ARABIDOPSIS PIN-FORMED 3 (ATPIN3)	S	427	-0.103485	-3.48813	-2.39523	-2.141	-0.568604	-2.85243	-3.00442	-1.20752	0.3017	-0.165745	-0.0170364	-2.17124	-3.08646	-0.0492764	-0.085104	0.0672092	-3.33816	4	___1							1	1.73865e-14	110.9	99.794	110.9	0.049078	177280000	427	0.898439	-0.123717	-0.133136	0.898505	-0.139252	-0.134165	0.497659	-0.913274	-0.730861	AT1G70940.1	427
AT1G70940	A regulator of auxin efflux and involved in differential growth. PIN3 is expressed in gravity-sensing tissues, with PIN3 protein accumulating predominantly at the lateral cell surface. PIN3 localizes to the plasma membrane and to vesicles. In roots, PIN3 is expressed without pronounced polarity in tiers two and three of the columella cells, at the basal side of vascular cells, and to the lateral …	PIN-FORMED 3 (PIN3)	PIN-FORMED 3 (PIN3);ARABIDOPSIS PIN-FORMED 3 (ATPIN3)	S	294	-1.36114	-1.86869	-3.34804	-2.0933	-3.27048	-3.53407	-2.94318	-3.21659	-2.6979	-1.95296	-1.23388	-3.2559	-2.42299	-2.30454	-1.56	-3.88486	-1.53108	2	___1							0.952329	7.87737e-152	387.95	349.77	387.95	-1.0503	459370000	294	0.0502158	1.07328	2.44374	0.100669	-0.579938	-2.00983	0.855518	0.157521	0.191701	AT1G70940.1	294
AT1G71080	RNA polymerase II transcription elongation factor;(source:Araport11)	0	0	S	136	1.28559	1.34877	1.3663	1.00493	-0.818178	-0.899038	0.60137	1.15387	0.713565	0.851257	0.859083	-2.86803	0.757181	-3.19405	0.981047	0.740154	0.647097	3	___1					+	Col-0_W_5A-1_W	0.999994	2.07094e-43	212.78	199.26	212.78	-0.55366	733380000	136	0.0544311	1.2419	2.38453	0.205338	1.77781	1.45534	0.0161436	0.461968	3.56414	AT1G71080.1	136
AT1G71190	Senescence associated gene (SAG). Expression induced by ozone. Encodes a plant-specific protein of unknown function. Based on a personal communication from David Meinke (08/21/2007), this gene is not allelic to TTN4, even though this has been stated previously in a publication.	SENESCENCE ASSOCIATED GENE 18 (SAG18)	SENESCENCE ASSOCIATED GENE 18 (SAG18)	S	232	-2.54152	-1.17671	-0.797005	-1.78036	0.615484	-0.0827999	-3.18916	-3.33187	-3.27994	-3.18751	-3.09117	-2.57656	-4.09343	-3.43462	-0.561392	-0.311184	-3.63596	3	___1							0.99043	3.82051e-07	112.39	92.312	96.679	-4.1786	196860000	232	0.946438	-0.0768118	-0.0700392	0.201	1.87112	1.472	0.946189	-0.0710536	-0.0709487	AT1G71190.2;AT1G71190.1	232;273
AT1G71710	DNAse I-like superfamily protein;(source:Araport11)	0	0	S	282	1.52798	2.9445	3.18789	0.776972	0.351414	0.775736	0.605379	0.515129	1.29984	1.71863	1.01895	0.701141	0.576288	-0.139561	0.95838	0.68911	0.0313759	2	___1	+	Col-0_W_Col-0_D					1	0.0296825	61.962	25.567	47.574	0.1018	1636400000	282	0.0376394	1.54742	2.6577	0.486001	0.182625	0.751857	0.0836147	1.54971	2.15594	AT1G71710.2;AT1G71710.1	282;291
[truncated: 3,757 more rows]
[truncated: 7 more columns]

## Sheet: S4B
Extended Data Table 4B. List of identified TOT3 phosphosites from phosphoprofiling of Arabidopsis seedlings (Col-0, ost1-3 and tot3 TOT3-5A) exposed to well watered conditions (W) or progressing drought stress (D)
[truncated: 13 more rows]

## Sheet: S4C
Extended Data Table 4C. List of identified TOT3 phosphosites from phosphoprofiling of Arabidopsis seedlings exposed to Mannitol (data taken from Z. Lin et al., Nat. Commun. 11, 613 (2020))
[truncated: 11 more rows]
