# Supplementary material for: A conserved signaling axis integrates conflicting environmental drought and heat signals to control stomatal aperture in plants
Source: Research Square preprint supplement (doi:10.21203/rs.3.rs-3228667/v1), 2023-08-18
Supplement: Supplementary file 6 [file d7a80671e04b0ed360216e75.xlsx]

## Sheet: Plasmid list
Extended Data Table 6. List of plasmids generated in this study
Construct	Destination Vector	Entry vector	Cloning system	Note
pTOT3::GUS	pP-GA	pGGA000 (pTOT3)	Golden Gate system	For pTOT3::GUS transgenic line
		pGGB003(B-dummy)
		pGGC051(GUS)
		pGGD002(D-dummy)
		pGG-E-G7T-F
		pGGF008
pTOT3::GFP:TOT3-3E	pP-GA	pGGA000 (pTOT3)	Golden Gate system	For TOT3-3E transgenic line
		pGGB-GFP-C
		pGGC000(TOT3-3E)
		pGGD002(D-dummy)
		pGG-E-G7T-F
		pGGF008
pTOT3::GFP:TOT3-5A	pP-GA	pGGA000 (pTOT3)	Golden Gate system	For TOT3-5A transgenic line
		pGGB-GFP-C
		pGGC000(TOT3-5A)
		pGGD002(D-dummy)
		pGG-E-G7T-F
		pGGF008
35S::3xHA:OST1	pP-GA	pGGA004 (35S)	Golden Gate system	For tobacco infiltration
		pGG_B-N-3xHA-C
		pGGC000(OST1)
		pGGD002(D-dummy)
		pGG-E-35ST-F
		pGGF008
35S::GFP:TOT3	pB7WGF2	pDONR221(TOT3)	Gateway system	For tobacco infiltration/CO-IP/MS
35S::GFP:TOT3D157N	pB7WGF2	pDONR221(TOT3D157N)	Gateway system	For tobacco infiltration/CO-IP/MS
35S::GFP:TOT3-3E	pB7WGF2	pDONR221(TOT3-3E)	Gateway system	For tobacco infiltration/CO-IP/MS
35S::GFP:TOT3-5A	pB7WGF2	pDONR221(TOT3-5A)	Gateway system	For tobacco infiltration/CO-IP/MS
35S::RFP:OST1	pB7WGR2	pDONR221(OST1)	Gateway system	For tobacco infiltration/CO-IP/MS
35S::RFP:AHA1	pB7WGR2	pDONR221(AHA1)	Gateway system	For tobacco infiltration/CO-IP/MS
GST::TOT3365-465	pDEST15	pDONR221(TOT3(365-465))	Gateway system	For E.coli recombinant protein
GST::TOT3365-465-5A	pDEST15	pDONR221(TOT3(365-465)-5A)	Gateway system	For E.coli recombinant protein
HisMBP::OST1	pDEST-HisMBP	pDONR221(OST1)	Gateway system	For E.coli recombinant protein
nYFP::TOT3-AHA1::cYFP	pBiFCt-2in1-NC	pDONR-P3P2(TOT3)	Gateway system	For BiFC
		pDONR-P1P4(AHA1)
nYFP::GST-AHA1::cYFP	pBiFCt-2in1-NC	pDONR-P3P2(GST)	Gateway system	For BiFC
		pDONR-P1P4(AHA1)
nYFP::TOT3-OST1::cYFP	pBiFCt-2in1-NC	pDONR-P3P2(TOT3)	Gateway system	For BiFC
		pDONR-P1P4(OST1)
nYFP::GST-OST1::cYFP	pBiFCt-2in1-NC	pDONR-P3P2(GST)	Gateway system	For BiFC
		pDONR-P1P4(OST1)
AD-TOT3	pGADT7-GW	pENTR223(TOT3)	Gateway system	For Y2H
BD-OST1	pBRIDGE	OST1 coding sequence (EcoRI-SalI fragment)	Restriction enzyme	For Y2H
MBP-TOT3-His	pET	N.A.	Gibson	For E.coli recombinant protein
MBP-TOT3-3E-His	pET	N.A.	Gibson	For E.coli recombinant protein
MBP-TOT3-3E-His	pET	N.A.	Gibson	For E.coli recombinant protein
MBP-TOT3D157N-His	pET	N.A.	Gibson	For E.coli recombinant protein
MBP-AHA1905-949-His	pET	N.A.	Gibson	For E.coli recombinant protein
